# Supplementary material for: Reduced PRC2 function alters male germline epigenetic programming and paternal inheritance
Source: BMC Biol. 2018 Sep 20;16:104. doi: 10.1186/s12915-018-0569-5 (PMC6149058; doi:10.1186/s12915-018-0569-5)
Supplement: Supplementary file 2 — Table S1. Eedwt/wt germ cell H3K27me3 ChIP-seq peaks. (XLSX 6770 kb) [file 12915_2018_569_MOESM2_ESM.xlsx]

## Sheet: Sup table 1
Table S1: Eedwt/wt germ cell H3K27me3 ChIP-seq peaks.
PeakID	Chr	Start	End	Strand	Peak Score	Focus Ratio/ Region Size	Annotation	Detailed Annotation	Distance to TSS	Nearest PromoterID	Entrez ID	Nearest Unigene	Nearest Refseq	Nearest Ensembl	Gene Name	Gene Description	Gene Type
chr8-3385	chr8	65463576	65468284	+	40.3	4708	Intergenic	Lx|LINE|L1	-152110	NM_001166372	72925	Mm.380457	NM_175188	ENSMUSG00000036469	Mar-01	membrane-associated ring finger (C3HC4) 1	protein-coding
chr8-2803	chr8	65564450	65568692	+	36.4	4242	Intergenic	Intergenic	-51469	NM_001166372	72925	Mm.380457	NM_175188	ENSMUSG00000036469	Mar-01	membrane-associated ring finger (C3HC4) 1	protein-coding
chr8-6903	chr8	65920952	65924790	+	33.9	3838	intron (NM_001166372, intron 2 of 7)	Charlie24|DNA|hAT-Charlie	304346	NM_175188	72925	Mm.380457	NM_175188	ENSMUSG00000036469	Mar-01	membrane-associated ring finger (C3HC4) 1	protein-coding
chr1-9971	chr1	184807508	184811428	+	33.5	3920	intron (NM_001290273, intron 1 of 6)	intron (NM_001290273, intron 1 of 6)	1832	NM_001290273	66112	Mm.272457	NM_001081361	ENSMUSG00000026621	Mar-01	mitochondrial amidoxime reducing component 1	protein-coding
chr8-8272	chr8	65932297	65936092	+	30	3795	intron (NM_001166372, intron 2 of 7)	intron (NM_001166372, intron 2 of 7)	315669	NM_175188	72925	Mm.380457	NM_175188	ENSMUSG00000036469	Mar-01	membrane-associated ring finger (C3HC4) 1	protein-coding
chr8-4070	chr8	65862000	65865483	+	26.5	3483	intron (NM_175188, intron 1 of 7)	URR1A|DNA|hAT-Charlie	245216	NM_175188	72925	Mm.380457	NM_175188	ENSMUSG00000036469	Mar-01	membrane-associated ring finger (C3HC4) 1	protein-coding
chr8-8259	chr8	65477930	65481341	+	25.8	3411	Intergenic	ORR1D2|LTR|ERVL-MaLR	-138405	NM_001166372	72925	Mm.380457	NM_175188	ENSMUSG00000036469	Mar-01	membrane-associated ring finger (C3HC4) 1	protein-coding
chr8-1155	chr8	65712792	65715748	+	24.9	2956	intron (NM_175188, intron 1 of 7)	intron (NM_175188, intron 1 of 7)	95745	NM_175188	72925	Mm.380457	NM_175188	ENSMUSG00000036469	Mar-01	membrane-associated ring finger (C3HC4) 1	protein-coding
chr8-6890	chr8	65382825	65386307	+	22	3482	Intergenic	B4A|SINE|B4	-233474	NM_001166372	72925	Mm.380457	NM_175188	ENSMUSG00000036469	Mar-01	membrane-associated ring finger (C3HC4) 1	protein-coding
chr8-8263	chr8	65574212	65576981	+	19.4	2769	Intergenic	L1VL2|LINE|L1	-42444	NM_001166372	72925	Mm.380457	NM_175188	ENSMUSG00000036469	Mar-01	membrane-associated ring finger (C3HC4) 1	protein-coding
chr8-5806	chr8	65837906	65840261	+	18.7	2355	intron (NM_175188, intron 1 of 7)	intron (NM_175188, intron 1 of 7)	220558	NM_175188	72925	Mm.380457	NM_175188	ENSMUSG00000036469	Mar-01	membrane-associated ring finger (C3HC4) 1	protein-coding
chr8-6896	chr8	65657703	65660004	+	17.9	2301	intron (NM_175188, intron 1 of 7)	MTB-int|LTR|ERVL-MaLR	40328	NM_175188	72925	Mm.380457	NM_175188	ENSMUSG00000036469	Mar-01	membrane-associated ring finger (C3HC4) 1	protein-coding
chr8-6905	chr8	65975853	65977903	+	17	2050	intron (NM_175188, intron 3 of 7)	intron (NM_175188, intron 3 of 7)	358353	NM_175188	72925	Mm.380457	NM_175188	ENSMUSG00000036469	Mar-01	membrane-associated ring finger (C3HC4) 1	protein-coding
chr8-3389	chr8	65584577	65586382	+	15.6	1805	Intergenic	Intergenic	-32561	NM_001166372	72925	Mm.380457	NM_175188	ENSMUSG00000036469	Mar-01	membrane-associated ring finger (C3HC4) 1	protein-coding
chr8-4875	chr8	66378815	66380617	+	15.4	1802	intron (NM_001293784, intron 5 of 8)	L1Md_T|LINE|L1	-6585	NM_001166375	72925	Mm.380457	NM_175188	ENSMUSG00000036469	Mar-01	membrane-associated ring finger (C3HC4) 1	protein-coding
chr8-6891	chr8	65442927	65444714	+	14.8	1787	Intergenic	Intergenic	-174220	NM_001166372	72925	Mm.380457	NM_175188	ENSMUSG00000036469	Mar-01	membrane-associated ring finger (C3HC4) 1	protein-coding
chr8-6897	chr8	65686054	65687712	+	13.7	1658	intron (NM_175188, intron 1 of 7)	intron (NM_175188, intron 1 of 7)	68358	NM_175188	72925	Mm.380457	NM_175188	ENSMUSG00000036469	Mar-01	membrane-associated ring finger (C3HC4) 1	protein-coding
chr8-8267	chr8	65828579	65830197	+	12.6	1618	intron (NM_175188, intron 1 of 7)	LTR72_RN|LTR|ERV1	210863	NM_175188	72925	Mm.380457	NM_175188	ENSMUSG00000036469	Mar-01	membrane-associated ring finger (C3HC4) 1	protein-coding
chr8-4071	chr8	65946926	65948441	+	11.5	1515	intron (NM_001166372, intron 2 of 7)	RLTR17D_Mm|LTR|ERVK	329158	NM_175188	72925	Mm.380457	NM_175188	ENSMUSG00000036469	Mar-01	membrane-associated ring finger (C3HC4) 1	protein-coding
chr8-3392	chr8	66240380	66241687	+	10.8	1307	intron (NM_001293784, intron 4 of 8)	Lx2|LINE|L1	-145268	NM_001166375	72925	Mm.380457	NM_175188	ENSMUSG00000036469	Mar-01	membrane-associated ring finger (C3HC4) 1	protein-coding
chr8-4872	chr8	65875676	65876948	+	10.4	1272	intron (NM_175188, intron 1 of 7)	intron (NM_175188, intron 1 of 7)	257787	NM_175188	72925	Mm.380457	NM_175188	ENSMUSG00000036469	Mar-01	membrane-associated ring finger (C3HC4) 1	protein-coding
chr8-8262	chr8	65521627	65522931	+	9.88	1304	Intergenic	Intergenic	-95761	NM_001166372	72925	Mm.380457	NM_175188	ENSMUSG00000036469	Mar-01	membrane-associated ring finger (C3HC4) 1	protein-coding
chr8-2362	chr8	66357080	66358080	+	9.33	1000	intron (NM_001293784, intron 5 of 8)	MTE2b-int|LTR|ERVL-MaLR	-28721	NM_001166375	72925	Mm.380457	NM_175188	ENSMUSG00000036469	Mar-01	membrane-associated ring finger (C3HC4) 1	protein-coding
chr8-2805	chr8	65722345	65723345	+	8.97	1000	intron (NM_175188, intron 1 of 7)	intron (NM_175188, intron 1 of 7)	104320	NM_175188	72925	Mm.380457	NM_175188	ENSMUSG00000036469	Mar-01	membrane-associated ring finger (C3HC4) 1	protein-coding
chr8-4072	chr8	66011349	66012349	+	8.97	1000	intron (NM_175188, intron 3 of 7)	intron (NM_175188, intron 3 of 7)	-374452	NM_001166375	72925	Mm.380457	NM_175188	ENSMUSG00000036469	Mar-01	membrane-associated ring finger (C3HC4) 1	protein-coding
chr8-4874	chr8	66079142	66080142	+	8.79	1000	intron (NM_175188, intron 3 of 7)	RMER19A|LTR|ERVK	-306659	NM_001166375	72925	Mm.380457	NM_175188	ENSMUSG00000036469	Mar-01	membrane-associated ring finger (C3HC4) 1	protein-coding
chr8-4866	chr8	65450794	65451794	+	8.42	1000	Intergenic	Lx5|LINE|L1	-166746	NM_001166372	72925	Mm.380457	NM_175188	ENSMUSG00000036469	Mar-01	membrane-associated ring finger (C3HC4) 1	protein-coding
chr8-4870	chr8	65663960	65664960	+	8.24	1000	intron (NM_175188, intron 1 of 7)	intron (NM_175188, intron 1 of 7)	45935	NM_175188	72925	Mm.380457	NM_175188	ENSMUSG00000036469	Mar-01	membrane-associated ring finger (C3HC4) 1	protein-coding
chr8-8270	chr8	65906186	65907186	+	8.24	1000	intron (NM_001166372, intron 2 of 7)	intron (NM_001166372, intron 2 of 7)	288161	NM_175188	72925	Mm.380457	NM_175188	ENSMUSG00000036469	Mar-01	membrane-associated ring finger (C3HC4) 1	protein-coding
chr8-8279	chr8	66278645	66279645	+	8.24	1000	intron (NM_001293784, intron 5 of 8)	intron (NM_001293784, intron 5 of 8)	-107156	NM_001166375	72925	Mm.380457	NM_175188	ENSMUSG00000036469	Mar-01	membrane-associated ring finger (C3HC4) 1	protein-coding
chr8-5809	chr8	66256027	66257027	+	8.24	1000	intron (NM_001293784, intron 4 of 8)	Lx5b|LINE|L1	-129774	NM_001166375	72925	Mm.380457	NM_175188	ENSMUSG00000036469	Mar-01	membrane-associated ring finger (C3HC4) 1	protein-coding
chr8-6902	chr8	65873117	65874117	+	8.24	1000	intron (NM_175188, intron 1 of 7)	intron (NM_175188, intron 1 of 7)	255092	NM_175188	72925	Mm.380457	NM_175188	ENSMUSG00000036469	Mar-01	membrane-associated ring finger (C3HC4) 1	protein-coding
chr8-6909	chr8	65991851	65992851	+	8.24	1000	intron (NM_175188, intron 3 of 7)	intron (NM_175188, intron 3 of 7)	373826	NM_175188	72925	Mm.380457	NM_175188	ENSMUSG00000036469	Mar-01	membrane-associated ring finger (C3HC4) 1	protein-coding
chr8-6908	chr8	65981837	65982837	+	8.05	1000	intron (NM_175188, intron 3 of 7)	intron (NM_175188, intron 3 of 7)	363812	NM_175188	72925	Mm.380457	NM_175188	ENSMUSG00000036469	Mar-01	membrane-associated ring finger (C3HC4) 1	protein-coding
chr8-5808	chr8	66016978	66017978	+	8.05	1000	intron (NM_175188, intron 3 of 7)	intron (NM_175188, intron 3 of 7)	-368823	NM_001166375	72925	Mm.380457	NM_175188	ENSMUSG00000036469	Mar-01	membrane-associated ring finger (C3HC4) 1	protein-coding
chr8-8276	chr8	66076547	66077547	+	7.87	1000	intron (NM_175188, intron 3 of 7)	intron (NM_175188, intron 3 of 7)	-309254	NM_001166375	72925	Mm.380457	NM_175188	ENSMUSG00000036469	Mar-01	membrane-associated ring finger (C3HC4) 1	protein-coding
chr8-8268	chr8	65851915	65852915	+	7.87	1000	intron (NM_175188, intron 1 of 7)	intron (NM_175188, intron 1 of 7)	233890	NM_175188	72925	Mm.380457	NM_175188	ENSMUSG00000036469	Mar-01	membrane-associated ring finger (C3HC4) 1	protein-coding
chr8-8277	chr8	66214091	66215091	+	7.87	1000	intron (NM_001293784, intron 4 of 8)	MTD|LTR|ERVL-MaLR	-171710	NM_001166375	72925	Mm.380457	NM_175188	ENSMUSG00000036469	Mar-01	membrane-associated ring finger (C3HC4) 1	protein-coding
chr8-6910	chr8	66359907	66360907	+	7.87	1000	intron (NM_001293784, intron 5 of 8)	MTE-int|LTR|ERVL-MaLR	-25894	NM_001166375	72925	Mm.380457	NM_175188	ENSMUSG00000036469	Mar-01	membrane-associated ring finger (C3HC4) 1	protein-coding
chr8-8265	chr8	65650810	65651810	+	7.87	1000	intron (NM_175188, intron 1 of 7)	intron (NM_175188, intron 1 of 7)	32785	NM_175188	72925	Mm.380457	NM_175188	ENSMUSG00000036469	Mar-01	membrane-associated ring finger (C3HC4) 1	protein-coding
chr8-8275	chr8	66055433	66056433	+	7.69	1000	intron (NM_175188, intron 3 of 7)	Lx8b|LINE|L1	-330368	NM_001166375	72925	Mm.380457	NM_175188	ENSMUSG00000036469	Mar-01	membrane-associated ring finger (C3HC4) 1	protein-coding
chr8-8264	chr8	65635921	65636921	+	6.96	1000	intron (NM_175188, intron 1 of 7)	intron (NM_175188, intron 1 of 7)	17896	NM_175188	72925	Mm.380457	NM_175188	ENSMUSG00000036469	Mar-01	membrane-associated ring finger (C3HC4) 1	protein-coding
chr17-3922	chr17	33732774	33737911	+	39	5137	Intergenic	Lx2B|LINE|L1	-16665	NR_045523	224703	Mm.311439	NM_145486	ENSMUSG00000079557	Mar-02	membrane-associated ring finger (C3HC4) 2	protein-coding
chr17-5252	chr17	33729224	33730756	+	13.4	1532	Intergenic	L1VL4|LINE|L1	-11313	NR_045523	224703	Mm.311439	NM_145486	ENSMUSG00000079557	Mar-02	membrane-associated ring finger (C3HC4) 2	protein-coding
chr18-1658	chr18	56830243	56831243	+	9.33	1000	intron (NM_177115, intron 1 of 4)	intron (NM_177115, intron 1 of 4)	94805	NM_177115	320253	Mm.312623	NM_177115	ENSMUSG00000032656	Mar-03	membrane-associated ring finger (C3HC4) 3	protein-coding
chr15-3258	chr15	82271908	82273731	+	14.6	1823	Intergenic	Intergenic	-2116	NM_011889	24050	Mm.309707	NM_011889	ENSMUSG00000022456	Sep-03	septin 3	protein-coding
chr1-12602	chr1	72530445	72536870	+	52.9	6425	intron (NM_001045533, intron 1 of 3)	intron (NM_001045533, intron 1 of 3)	2907	NM_001045533	381270	Mm.337023	NM_001045533	ENSMUSG00000039372	Mar-04	membrane-associated ring finger (C3HC4) 4	protein-coding
chr9-2660	chr9	25347666	25349926	+	20.1	2260	Intergenic	Intergenic	96357	NM_009859	235072	Mm.270259	NM_009859	ENSMUSG00000001833	Sep-07	septin 7	protein-coding
chr9-7129	chr9	25223379	25224379	+	8.05	1000	Intergenic	Intergenic	-28560	NM_001205367	235072	Mm.270259	NM_009859	ENSMUSG00000001833	Sep-07	septin 7	protein-coding
chr11-4418	chr11	117196595	117202779	+	52.9	6184	promoter-TSS (NM_001113486)	promoter-TSS (NM_001113486)	26	NM_001113486	53860	Mm.38450	NM_017380	ENSMUSG00000059248	Sep-09	septin 9	protein-coding
chr11-7399	chr11	117233062	117235498	+	21	2436	intron (NM_001113486, intron 2 of 11)	intron (NM_001113486, intron 2 of 11)	-31966	NM_001113487	53860	Mm.38450	NM_017380	ENSMUSG00000059248	Sep-09	septin 9	protein-coding
chr11-9495	chr11	117371647	117372924	+	10.4	1277	Intergenic	MLT2B4|LTR|ERVL	39972	NM_001113488	53860	Mm.38450	NM_017380	ENSMUSG00000059248	Sep-09	septin 9	protein-coding
chr11-9496	chr11	117393811	117395107	+	9.15	1296	Intergenic	Intergenic	62146	NM_001113488	53860	Mm.38450	NM_017380	ENSMUSG00000059248	Sep-09	septin 9	protein-coding
chr10-5844	chr10	59036611	59037611	+	8.79	1000	intron (NM_172788, intron 3 of 9)	Lx2B|LINE|L1	184736	NM_001024910	103080	Mm.346842	NM_001024910	ENSMUSG00000019917	Sep-10	septin 10	protein-coding
chr15-3570	chr15	26166845	26168539	+	13.4	1694	Intergenic	Intergenic	-141380	NM_177597	211147	Mm.54257	NM_177597	ENSMUSG00000022269	Mar-11	membrane-associated ring finger (C3HC4) 11	protein-coding
chr15-3571	chr15	26485160	26486430	+	11	1270	Intergenic	Intergenic	176723	NM_177597	211147	Mm.54257	NM_177597	ENSMUSG00000022269	Mar-11	membrane-associated ring finger (C3HC4) 11	protein-coding
chr15-4158	chr15	26208498	26209498	+	8.6	1000	Intergenic	Intergenic	-100074	NM_177597	211147	Mm.54257	NM_177597	ENSMUSG00000022269	Mar-11	membrane-associated ring finger (C3HC4) 11	protein-coding
chr15-5759	chr15	26306370	26307370	+	8.24	1000	Intergenic	Intergenic	-2202	NM_177597	211147	Mm.54257	NM_177597	ENSMUSG00000022269	Mar-11	membrane-associated ring finger (C3HC4) 11	protein-coding
chr5-18429	chr5	129702064	129705467	+	25.1	3403	intron (NM_028826, intron 3 of 10)	intron (NM_028826, intron 3 of 10)	4746	NM_028826	74222	Mm.159143	NM_028826	ENSMUSG00000034219	Sep-14	septin 14	protein-coding
chr5-18428	chr5	129696428	129697428	+	8.05	1000	intron (NM_028826, intron 5 of 10)	MTD|LTR|ERVL-MaLR	11583	NM_028826	74222	Mm.159143	NM_028826	ENSMUSG00000034219	Sep-14	septin 14	protein-coding
chr3-15681	chr3	144614932	144617763	+	24.3	2831	Intergenic	Intergenic	45920	NM_053102	93684	Mm.29812	NM_053102	ENSMUSG00000037072	Sep-15	selenoprotein	protein-coding
chr3-9265	chr3	144628616	144629616	+	8.6	1000	Intergenic	ORR1F|LTR|ERVL-MaLR	58689	NM_053102	93684	Mm.29812	NM_053102	ENSMUSG00000037072	Sep-15	selenoprotein	protein-coding
chr5-6800	chr5	143337163	143338418	+	11	1255	Intergenic	B4A|SINE|B4	8482	NR_027874	67672	Mm.30983	NR_027874	ENSMUSG00000089889	0610040B10Rik	RIKEN cDNA 0610040B10 gene	ncRNA
chr6-7703	chr6	108662547	108671557	+	74.9	9010	TTS (NM_011498)	TTS (NM_011498)	-6118	NR_104577	75394	Mm.395061	NR_040757	ENSMUSG00000087341	0610040F04Rik	RIKEN cDNA 0610040F04 gene	ncRNA
chr6-12888	chr6	108588627	108589627	+	7.87	1000	intron (NR_104577, intron 3 of 6)	Lx8|LINE|L1	34040	NR_040757	75394	Mm.395061	NR_040757	ENSMUSG00000087341	0610040F04Rik	RIKEN cDNA 0610040F04 gene	ncRNA
chr5-6231	chr5	63805170	63810719	+	54.2	5549	exon (NM_177006, exon 7 of 7)	exon (NM_177006, exon 7 of 7)	-4551	NM_029554	76261	Mm.38143	NM_029554	ENSMUSG00000060512	0610040J01Rik	RIKEN cDNA 0610040J01 gene	protein-coding
chr5-8303	chr5	63734353	63738068	+	29.3	3715	intron (NM_177006, intron 2 of 6)	intron (NM_177006, intron 2 of 6)	-76285	NM_029554	76261	Mm.38143	NM_029554	ENSMUSG00000060512	0610040J01Rik	RIKEN cDNA 0610040J01 gene	protein-coding
chr5-5408	chr5	63878092	63881044	+	24	2952	intron (NM_029554, intron 2 of 3)	(TTTTG)n|Simple_repeat|Simple_repeat	67073	NM_029554	76261	Mm.38143	NM_029554	ENSMUSG00000060512	0610040J01Rik	RIKEN cDNA 0610040J01 gene	protein-coding
chr5-12896	chr5	63793126	63795919	+	23.4	2793	intron (NM_177006, intron 5 of 6)	intron (NM_177006, intron 5 of 6)	-17973	NM_029554	76261	Mm.38143	NM_029554	ENSMUSG00000060512	0610040J01Rik	RIKEN cDNA 0610040J01 gene	protein-coding
chr5-12897	chr5	63812838	63814741	+	17.2	1903	intron (NM_029554, intron 1 of 3)	intron (NM_029554, intron 1 of 3)	1294	NM_029554	76261	Mm.38143	NM_029554	ENSMUSG00000060512	0610040J01Rik	RIKEN cDNA 0610040J01 gene	protein-coding
chr5-11167	chr5	63799924	63801591	+	13.4	1667	intron (NM_177006, intron 6 of 6)	intron (NM_177006, intron 6 of 6)	-11738	NM_029554	76261	Mm.38143	NM_029554	ENSMUSG00000060512	0610040J01Rik	RIKEN cDNA 0610040J01 gene	protein-coding
chr5-8304	chr5	63767805	63768805	+	8.97	1000	intron (NM_177006, intron 3 of 6)	MTD|LTR|ERVL-MaLR	-44190	NM_029554	76261	Mm.38143	NM_029554	ENSMUSG00000060512	0610040J01Rik	RIKEN cDNA 0610040J01 gene	protein-coding
chr18-890	chr18	11287301	11288301	+	9.52	1000	Intergenic	(CATATA)n|Simple_repeat|Simple_repeat	-235234	NR_105022	68434	Mm.57626	NR_105022	ENSMUSG00000097222	1010001N08Rik	RIKEN cDNA 1010001N08 gene	ncRNA
chr18-2098	chr18	11298404	11299404	+	8.79	1000	Intergenic	Lx|LINE|L1	-246337	NR_105022	68434	Mm.57626	NR_105022	ENSMUSG00000097222	1010001N08Rik	RIKEN cDNA 1010001N08 gene	ncRNA
chr18-2449	chr18	11184579	11185579	+	8.6	1000	Intergenic	Intergenic	-132512	NR_105022	68434	Mm.57626	NR_105022	ENSMUSG00000097222	1010001N08Rik	RIKEN cDNA 1010001N08 gene	ncRNA
chr18-3429	chr18	11075912	11076912	+	8.05	1000	intron (NM_010258, intron 6 of 6)	intron (NM_010258, intron 6 of 6)	-23845	NR_105022	68434	Mm.57626	NR_105022	ENSMUSG00000097222	1010001N08Rik	RIKEN cDNA 1010001N08 gene	ncRNA
chr18-3428	chr18	11056317	11057317	+	8.05	1000	intron (NM_010258, intron 2 of 6)	intron (NM_010258, intron 2 of 6)	-4250	NR_105022	68434	Mm.57626	NR_105022	ENSMUSG00000097222	1010001N08Rik	RIKEN cDNA 1010001N08 gene	ncRNA
chr13-7036	chr13	49218105	49219554	+	12.3	1449	Intergenic	Intergenic	-2803	NM_026738	68480	Mm.3336	NM_026738	ENSMUSG00000037960	1110007C09Rik	RIKEN cDNA 1110007C09 gene	protein-coding
chr3-5558	chr3	4906170	4918385	+	92.8	12215	Intergenic	MuRRS4-int|LTR|ERV1	113569	NR_045272	100503859	Mm.75172	NR_045272	ENSMUSG00000098659	1110015O18Rik	RIKEN cDNA 1110015O18 gene	ncRNA
chr3-6678	chr3	4748772	4758558	+	77.4	9786	Intergenic	Lx3A|LINE|L1	-45043	NR_045272	100503859	Mm.75172	NR_045272	ENSMUSG00000098659	1110015O18Rik	RIKEN cDNA 1110015O18 gene	ncRNA
chr3-13481	chr3	4992500	5000728	+	71	8228	Intergenic	L1_Mus3|LINE|L1	197906	NR_045272	100503859	Mm.75172	NR_045272	ENSMUSG00000098659	1110015O18Rik	RIKEN cDNA 1110015O18 gene	ncRNA
chr3-3229	chr3	4771177	4778664	+	61.5	7487	Intergenic	Intergenic	-23788	NR_045272	100503859	Mm.75172	NR_045272	ENSMUSG00000098659	1110015O18Rik	RIKEN cDNA 1110015O18 gene	ncRNA
chr3-9428	chr3	4708411	4715064	+	61	6653	Intergenic	L1Md_F2|LINE|L1	-86971	NR_045272	100503859	Mm.75172	NR_045272	ENSMUSG00000098659	1110015O18Rik	RIKEN cDNA 1110015O18 gene	ncRNA
chr3-11265	chr3	4171781	4178342	+	57.3	6561	Intergenic	L1_Mus2|LINE|L1	-623647	NR_045272	100503859	Mm.75172	NR_045272	ENSMUSG00000098659	1110015O18Rik	RIKEN cDNA 1110015O18 gene	ncRNA
chr3-13439	chr3	4231292	4238346	+	56.7	7054	Intergenic	L1_Mus3|LINE|L1	-563889	NR_045272	100503859	Mm.75172	NR_045272	ENSMUSG00000098659	1110015O18Rik	RIKEN cDNA 1110015O18 gene	ncRNA
chr3-9438	chr3	4880862	4887674	+	56	6812	Intergenic	L1_Mus1|LINE|L1	85560	NR_045272	100503859	Mm.75172	NR_045272	ENSMUSG00000098659	1110015O18Rik	RIKEN cDNA 1110015O18 gene	ncRNA
chr3-5537	chr3	4181664	4188687	+	55.1	7023	Intergenic	Intergenic	-613533	NR_045272	100503859	Mm.75172	NR_045272	ENSMUSG00000098659	1110015O18Rik	RIKEN cDNA 1110015O18 gene	ncRNA
chr3-13457	chr3	4634033	4640806	+	53.1	6773	Intergenic	L1_Mus2|LINE|L1	-161289	NR_045272	100503859	Mm.75172	NR_045272	ENSMUSG00000098659	1110015O18Rik	RIKEN cDNA 1110015O18 gene	ncRNA
chr3-2716	chr3	4824995	4831373	+	52	6378	Intergenic	L1_Mus1|LINE|L1	29476	NR_045272	100503859	Mm.75172	NR_045272	ENSMUSG00000098659	1110015O18Rik	RIKEN cDNA 1110015O18 gene	ncRNA
chr3-11291	chr3	4552211	4558714	+	48.1	6503	Intergenic	RLTR44-int|LTR|ERVK	-243246	NR_045272	100503859	Mm.75172	NR_045272	ENSMUSG00000098659	1110015O18Rik	RIKEN cDNA 1110015O18 gene	ncRNA
chr3-11293	chr3	4570400	4576073	+	44.3	5673	Intergenic	L1_Mus2|LINE|L1	-225472	NR_045272	100503859	Mm.75172	NR_045272	ENSMUSG00000098659	1110015O18Rik	RIKEN cDNA 1110015O18 gene	ncRNA
chr3-13478	chr3	4956651	4962534	+	43.6	5883	Intergenic	L1_Mus1|LINE|L1	160884	NR_045272	100503859	Mm.75172	NR_045272	ENSMUSG00000098659	1110015O18Rik	RIKEN cDNA 1110015O18 gene	ncRNA
chr3-1963	chr3	5002326	5007648	+	41.9	5322	Intergenic	RMER17A2|LTR|ERVK	206279	NR_045272	100503859	Mm.75172	NR_045272	ENSMUSG00000098659	1110015O18Rik	RIKEN cDNA 1110015O18 gene	ncRNA
chr3-7972	chr3	4267658	4272204	+	34.2	4546	Intergenic	Intergenic	-528777	NR_045272	100503859	Mm.75172	NR_045272	ENSMUSG00000098659	1110015O18Rik	RIKEN cDNA 1110015O18 gene	ncRNA
chr3-11311	chr3	4922320	4926343	+	33.7	4023	Intergenic	L1_Mus3|LINE|L1	125623	NR_045272	100503859	Mm.75172	NR_045272	ENSMUSG00000098659	1110015O18Rik	RIKEN cDNA 1110015O18 gene	ncRNA
chr3-9417	chr3	4477372	4481917	+	32.2	4545	Intergenic	L1_Mus3|LINE|L1	-319064	NR_045272	100503859	Mm.75172	NR_045272	ENSMUSG00000098659	1110015O18Rik	RIKEN cDNA 1110015O18 gene	ncRNA
chr3-6674	chr3	4648403	4652924	+	30.9	4521	Intergenic	L1M3|LINE|L1	-148045	NR_045272	100503859	Mm.75172	NR_045272	ENSMUSG00000098659	1110015O18Rik	RIKEN cDNA 1110015O18 gene	ncRNA
chr3-4658	chr3	4762515	4765980	+	29.8	3465	Intergenic	MMVL30-int|LTR|ERV1	-34461	NR_045272	100503859	Mm.75172	NR_045272	ENSMUSG00000098659	1110015O18Rik	RIKEN cDNA 1110015O18 gene	ncRNA
chr3-6684	chr3	4807356	4811007	+	29.1	3651	intron (NR_045272, intron 3 of 3)	L1VL4|LINE|L1	10473	NR_045272	100503859	Mm.75172	NR_045272	ENSMUSG00000098659	1110015O18Rik	RIKEN cDNA 1110015O18 gene	ncRNA
chr3-11295	chr3	4580765	4583812	+	27.3	3047	Intergenic	Intergenic	-216420	NR_045272	100503859	Mm.75172	NR_045272	ENSMUSG00000098659	1110015O18Rik	RIKEN cDNA 1110015O18 gene	ncRNA
chr3-13465	chr3	4813648	4817109	+	25.6	3461	TTS (NR_045272)	TTS (NR_045272)	16670	NR_045272	100503859	Mm.75172	NR_045272	ENSMUSG00000098659	1110015O18Rik	RIKEN cDNA 1110015O18 gene	ncRNA
chr3-5556	chr3	4834858	4837900	+	23.2	3042	Intergenic	Intergenic	37671	NR_045272	100503859	Mm.75172	NR_045272	ENSMUSG00000098659	1110015O18Rik	RIKEN cDNA 1110015O18 gene	ncRNA
chr3-1261	chr3	4944175	4946655	+	23.2	2480	Intergenic	Lx3A|LINE|L1	146707	NR_045272	100503859	Mm.75172	NR_045272	ENSMUSG00000098659	1110015O18Rik	RIKEN cDNA 1110015O18 gene	ncRNA
chr3-5543	chr3	4345403	4348506	+	22.5	3103	Intergenic	Lx3A|LINE|L1	-451754	NR_045272	100503859	Mm.75172	NR_045272	ENSMUSG00000098659	1110015O18Rik	RIKEN cDNA 1110015O18 gene	ncRNA
chr3-4646	chr3	4491876	4494620	+	22.1	2744	Intergenic	Lx3_Mus|LINE|L1	-305460	NR_045272	100503859	Mm.75172	NR_045272	ENSMUSG00000098659	1110015O18Rik	RIKEN cDNA 1110015O18 gene	ncRNA
chr3-13447	chr3	4381454	4384342	+	22	2888	Intergenic	Intergenic	-415810	NR_045272	100503859	Mm.75172	NR_045272	ENSMUSG00000098659	1110015O18Rik	RIKEN cDNA 1110015O18 gene	ncRNA
chr3-13435	chr3	4217291	4220129	+	21	2838	Intergenic	Intergenic	-579998	NR_045272	100503859	Mm.75172	NR_045272	ENSMUSG00000098659	1110015O18Rik	RIKEN cDNA 1110015O18 gene	ncRNA
chr3-13445	chr3	4375334	4377907	+	21	2573	Intergenic	Intergenic	-422088	NR_045272	100503859	Mm.75172	NR_045272	ENSMUSG00000098659	1110015O18Rik	RIKEN cDNA 1110015O18 gene	ncRNA
chr3-9419	chr3	4524705	4526973	+	20.9	2268	Intergenic	Lx2|LINE|L1	-272869	NR_045272	100503859	Mm.75172	NR_045272	ENSMUSG00000098659	1110015O18Rik	RIKEN cDNA 1110015O18 gene	ncRNA
chr3-11312	chr3	4933272	4935747	+	20.3	2475	Intergenic	Intergenic	135801	NR_045272	100503859	Mm.75172	NR_045272	ENSMUSG00000098659	1110015O18Rik	RIKEN cDNA 1110015O18 gene	ncRNA
chr3-11279	chr3	4401104	4403785	+	20.1	2681	Intergenic	Intergenic	-396264	NR_045272	100503859	Mm.75172	NR_045272	ENSMUSG00000098659	1110015O18Rik	RIKEN cDNA 1110015O18 gene	ncRNA
chr3-2292	chr3	4865687	4867666	+	19.2	1979	Intergenic	Intergenic	67968	NR_045272	100503859	Mm.75172	NR_045272	ENSMUSG00000098659	1110015O18Rik	RIKEN cDNA 1110015O18 gene	ncRNA
chr3-4645	chr3	4444570	4446728	+	19.2	2158	Intergenic	Intergenic	-353059	NR_045272	100503859	Mm.75172	NR_045272	ENSMUSG00000098659	1110015O18Rik	RIKEN cDNA 1110015O18 gene	ncRNA
chr3-13448	chr3	4428280	4430362	+	17.6	2082	Intergenic	Intergenic	-369387	NR_045272	100503859	Mm.75172	NR_045272	ENSMUSG00000098659	1110015O18Rik	RIKEN cDNA 1110015O18 gene	ncRNA
chr3-13441	chr3	4260616	4262596	+	17.2	1980	Intergenic	L1_Mur3|LINE|L1	-537102	NR_045272	100503859	Mm.75172	NR_045272	ENSMUSG00000098659	1110015O18Rik	RIKEN cDNA 1110015O18 gene	ncRNA
chr3-3894	chr3	4303234	4304999	+	15.7	1765	Intergenic	Lx2|LINE|L1	-494592	NR_045272	100503859	Mm.75172	NR_045272	ENSMUSG00000098659	1110015O18Rik	RIKEN cDNA 1110015O18 gene	ncRNA
chr3-6667	chr3	4341347	4343155	+	15.6	1808	Intergenic	Intergenic	-456457	NR_045272	100503859	Mm.75172	NR_045272	ENSMUSG00000098659	1110015O18Rik	RIKEN cDNA 1110015O18 gene	ncRNA
chr3-13438	chr3	4221682	4223449	+	15.2	1767	Intergenic	Kanga1b|DNA|TcMar-Tc2	-576143	NR_045272	100503859	Mm.75172	NR_045272	ENSMUSG00000098659	1110015O18Rik	RIKEN cDNA 1110015O18 gene	ncRNA
chr3-11273	chr3	4312286	4314130	+	15	1844	Intergenic	Intergenic	-485500	NR_045272	100503859	Mm.75172	NR_045272	ENSMUSG00000098659	1110015O18Rik	RIKEN cDNA 1110015O18 gene	ncRNA
chr3-5562	chr3	4982925	4984727	+	14.6	1802	Intergenic	Intergenic	185118	NR_045272	100503859	Mm.75172	NR_045272	ENSMUSG00000098659	1110015O18Rik	RIKEN cDNA 1110015O18 gene	ncRNA
chr3-5539	chr3	4209771	4211356	+	14.5	1585	Intergenic	RLTR13D6|LTR|ERVK	-588145	NR_045272	100503859	Mm.75172	NR_045272	ENSMUSG00000098659	1110015O18Rik	RIKEN cDNA 1110015O18 gene	ncRNA
chr3-7974	chr3	4299652	4301369	+	14.3	1717	Intergenic	L1_Mus2|LINE|L1	-498198	NR_045272	100503859	Mm.75172	NR_045272	ENSMUSG00000098659	1110015O18Rik	RIKEN cDNA 1110015O18 gene	ncRNA
chr3-11271	chr3	4253316	4255009	+	13.5	1693	Intergenic	Intergenic	-544546	NR_045272	100503859	Mm.75172	NR_045272	ENSMUSG00000098659	1110015O18Rik	RIKEN cDNA 1110015O18 gene	ncRNA
chr3-7995	chr3	4877623	4879269	+	13.4	1646	Intergenic	L1_Mus2|LINE|L1	79738	NR_045272	100503859	Mm.75172	NR_045272	ENSMUSG00000098659	1110015O18Rik	RIKEN cDNA 1110015O18 gene	ncRNA
chr3-11287	chr3	4500937	4502539	+	13.2	1602	Intergenic	IMPB_01|Satellite|Satellite	-296970	NR_045272	100503859	Mm.75172	NR_045272	ENSMUSG00000098659	1110015O18Rik	RIKEN cDNA 1110015O18 gene	ncRNA
chr3-11282	chr3	4449025	4450629	+	13	1604	Intergenic	Intergenic	-348881	NR_045272	100503859	Mm.75172	NR_045272	ENSMUSG00000098659	1110015O18Rik	RIKEN cDNA 1110015O18 gene	ncRNA
chr3-9414	chr3	4422944	4424618	+	13	1674	Intergenic	L1_Mus1|LINE|L1	-374927	NR_045272	100503859	Mm.75172	NR_045272	ENSMUSG00000098659	1110015O18Rik	RIKEN cDNA 1110015O18 gene	ncRNA
chr3-9420	chr3	4531984	4533593	+	12.8	1609	Intergenic	Lx2A1|LINE|L1	-265920	NR_045272	100503859	Mm.75172	NR_045272	ENSMUSG00000098659	1110015O18Rik	RIKEN cDNA 1110015O18 gene	ncRNA
chr3-4644	chr3	4351467	4352919	+	12.8	1452	Intergenic	Intergenic	-446515	NR_045272	100503859	Mm.75172	NR_045272	ENSMUSG00000098659	1110015O18Rik	RIKEN cDNA 1110015O18 gene	ncRNA
chr3-11313	chr3	4940780	4942354	+	12.8	1574	Intergenic	L1_Mus4|LINE|L1	142859	NR_045272	100503859	Mm.75172	NR_045272	ENSMUSG00000098659	1110015O18Rik	RIKEN cDNA 1110015O18 gene	ncRNA
chr3-9405	chr3	4197216	4198854	+	12.6	1638	Intergenic	MTB_Mm|LTR|ERVL-MaLR	-600673	NR_045272	100503859	Mm.75172	NR_045272	ENSMUSG00000098659	1110015O18Rik	RIKEN cDNA 1110015O18 gene	ncRNA
chr3-6683	chr3	4790914	4792472	+	12.6	1558	Intergenic	RLTR10B2|LTR|ERVK	-7015	NR_045272	100503859	Mm.75172	NR_045272	ENSMUSG00000098659	1110015O18Rik	RIKEN cDNA 1110015O18 gene	ncRNA
chr3-6670	chr3	4535601	4537055	+	12.3	1454	Intergenic	Intergenic	-262380	NR_045272	100503859	Mm.75172	NR_045272	ENSMUSG00000098659	1110015O18Rik	RIKEN cDNA 1110015O18 gene	ncRNA
chr3-3225	chr3	4561665	4563046	+	11.7	1381	Intergenic	Intergenic	-236353	NR_045272	100503859	Mm.75172	NR_045272	ENSMUSG00000098659	1110015O18Rik	RIKEN cDNA 1110015O18 gene	ncRNA
chr3-6664	chr3	4282638	4284056	+	11.7	1418	Intergenic	Intergenic	-515361	NR_045272	100503859	Mm.75172	NR_045272	ENSMUSG00000098659	1110015O18Rik	RIKEN cDNA 1110015O18 gene	ncRNA
chr3-6675	chr3	4684461	4685768	+	11.2	1307	Intergenic	Lx|LINE|L1	-113594	NR_045272	100503859	Mm.75172	NR_045272	ENSMUSG00000098659	1110015O18Rik	RIKEN cDNA 1110015O18 gene	ncRNA
chr3-5561	chr3	4979279	4980573	+	11.2	1294	Intergenic	Lx|LINE|L1	181218	NR_045272	100503859	Mm.75172	NR_045272	ENSMUSG00000098659	1110015O18Rik	RIKEN cDNA 1110015O18 gene	ncRNA
chr3-9427	chr3	4704858	4706297	+	11.2	1439	Intergenic	L1_Mus3|LINE|L1	-93131	NR_045272	100503859	Mm.75172	NR_045272	ENSMUSG00000098659	1110015O18Rik	RIKEN cDNA 1110015O18 gene	ncRNA
chr3-3897	chr3	4701698	4702966	+	10.8	1268	Intergenic	Lx7|LINE|L1	-96376	NR_045272	100503859	Mm.75172	NR_045272	ENSMUSG00000098659	1110015O18Rik	RIKEN cDNA 1110015O18 gene	ncRNA
chr3-9439	chr3	4890135	4891472	+	10.8	1337	Intergenic	Intergenic	92095	NR_045272	100503859	Mm.75172	NR_045272	ENSMUSG00000098659	1110015O18Rik	RIKEN cDNA 1110015O18 gene	ncRNA
chr3-13434	chr3	4200431	4201734	+	10.4	1303	Intergenic	Intergenic	-597626	NR_045272	100503859	Mm.75172	NR_045272	ENSMUSG00000098659	1110015O18Rik	RIKEN cDNA 1110015O18 gene	ncRNA
chr3-6666	chr3	4328709	4329994	+	10.4	1285	Intergenic	Lx5c|LINE|L1	-469357	NR_045272	100503859	Mm.75172	NR_045272	ENSMUSG00000098659	1110015O18Rik	RIKEN cDNA 1110015O18 gene	ncRNA
chr3-11290	chr3	4545978	4547275	+	10.3	1297	Intergenic	Intergenic	-252082	NR_045272	100503859	Mm.75172	NR_045272	ENSMUSG00000098659	1110015O18Rik	RIKEN cDNA 1110015O18 gene	ncRNA
chr3-5546	chr3	4467449	4468449	+	8.97	1000	Intergenic	Lx2|LINE|L1	-330759	NR_045272	100503859	Mm.75172	NR_045272	ENSMUSG00000098659	1110015O18Rik	RIKEN cDNA 1110015O18 gene	ncRNA
chr3-6665	chr3	4287239	4288239	+	8.97	1000	Intergenic	Intergenic	-510969	NR_045272	100503859	Mm.75172	NR_045272	ENSMUSG00000098659	1110015O18Rik	RIKEN cDNA 1110015O18 gene	ncRNA
chr3-6676	chr3	4688695	4689695	+	8.79	1000	Intergenic	Lx5c|LINE|L1	-109513	NR_045272	100503859	Mm.75172	NR_045272	ENSMUSG00000098659	1110015O18Rik	RIKEN cDNA 1110015O18 gene	ncRNA
chr3-9429	chr3	4732354	4733354	+	8.6	1000	Intergenic	Intergenic	-65854	NR_045272	100503859	Mm.75172	NR_045272	ENSMUSG00000098659	1110015O18Rik	RIKEN cDNA 1110015O18 gene	ncRNA
chr3-11285	chr3	4474821	4475821	+	8.42	1000	Intergenic	Lx2|LINE|L1	-323387	NR_045272	100503859	Mm.75172	NR_045272	ENSMUSG00000098659	1110015O18Rik	RIKEN cDNA 1110015O18 gene	ncRNA
chr3-11296	chr3	4591720	4592720	+	8.42	1000	Intergenic	(CATA)n|Simple_repeat|Simple_repeat	-206488	NR_045272	100503859	Mm.75172	NR_045272	ENSMUSG00000098659	1110015O18Rik	RIKEN cDNA 1110015O18 gene	ncRNA
chr3-11297	chr3	4595043	4596043	+	8.42	1000	Intergenic	Intergenic	-203165	NR_045272	100503859	Mm.75172	NR_045272	ENSMUSG00000098659	1110015O18Rik	RIKEN cDNA 1110015O18 gene	ncRNA
chr3-13459	chr3	4665803	4666803	+	8.42	1000	Intergenic	L1_Mus3|LINE|L1	-132405	NR_045272	100503859	Mm.75172	NR_045272	ENSMUSG00000098659	1110015O18Rik	RIKEN cDNA 1110015O18 gene	ncRNA
chr3-11288	chr3	4520091	4521091	+	8.42	1000	Intergenic	Lx3_Mus|LINE|L1	-278117	NR_045272	100503859	Mm.75172	NR_045272	ENSMUSG00000098659	1110015O18Rik	RIKEN cDNA 1110015O18 gene	ncRNA
chr3-11303	chr3	4783264	4784264	+	8.24	1000	Intergenic	Intergenic	-14944	NR_045272	100503859	Mm.75172	NR_045272	ENSMUSG00000098659	1110015O18Rik	RIKEN cDNA 1110015O18 gene	ncRNA
chr3-11278	chr3	4393781	4394781	+	8.24	1000	Intergenic	Intergenic	-404427	NR_045272	100503859	Mm.75172	NR_045272	ENSMUSG00000098659	1110015O18Rik	RIKEN cDNA 1110015O18 gene	ncRNA
chr3-11306	chr3	4857369	4858369	+	8.24	1000	Intergenic	L1Md_F2|LINE|L1	59161	NR_045272	100503859	Mm.75172	NR_045272	ENSMUSG00000098659	1110015O18Rik	RIKEN cDNA 1110015O18 gene	ncRNA
chr3-13456	chr3	4604341	4605341	+	8.05	1000	Intergenic	Intergenic	-193867	NR_045272	100503859	Mm.75172	NR_045272	ENSMUSG00000098659	1110015O18Rik	RIKEN cDNA 1110015O18 gene	ncRNA
chr3-11286	chr3	4484713	4485713	+	8.05	1000	Intergenic	L1_Mur1|LINE|L1	-313495	NR_045272	100503859	Mm.75172	NR_045272	ENSMUSG00000098659	1110015O18Rik	RIKEN cDNA 1110015O18 gene	ncRNA
chr3-7976	chr3	4364013	4365013	+	7.87	1000	Intergenic	Intergenic	-434195	NR_045272	100503859	Mm.75172	NR_045272	ENSMUSG00000098659	1110015O18Rik	RIKEN cDNA 1110015O18 gene	ncRNA
chr3-11284	chr3	4456756	4457756	+	7.69	1000	Intergenic	Lx|LINE|L1	-341452	NR_045272	100503859	Mm.75172	NR_045272	ENSMUSG00000098659	1110015O18Rik	RIKEN cDNA 1110015O18 gene	ncRNA
chr3-13467	chr3	4847374	4848374	+	7.69	1000	Intergenic	L1_Mus3|LINE|L1	49166	NR_045272	100503859	Mm.75172	NR_045272	ENSMUSG00000098659	1110015O18Rik	RIKEN cDNA 1110015O18 gene	ncRNA
chr4-11936	chr4	41510941	41513007	+	16.8	2066	intron (NR_045549, intron 1 of 6)	intron (NR_045549, intron 1 of 6)	-4210	NR_045551	73721	Mm.45614	NM_028624	ENSMUSG00000028441	1110017D15Rik	RIKEN cDNA 1110017D15 gene	protein-coding
chr4-5660	chr4	41514684	41515684	+	8.97	1000	intron (NR_045549, intron 1 of 6)	B1_Mur2|SINE|Alu	2149	NR_045549	73721	Mm.45614	NM_028624	ENSMUSG00000028441	1110017D15Rik	RIKEN cDNA 1110017D15 gene	protein-coding
chr6-9820	chr6	14182346	14189670	+	58.8	7324	Intergenic	MLT1A1|LTR|ERVL-MaLR	314439	NR_045995	76311	Mm.367129	NR_045995	ENSMUSG00000097616	1110019D14Rik	RIKEN cDNA 1110019D14 gene	ncRNA
chr6-6926	chr6	14226446	14233460	+	53.3	7014	Intergenic	L1_Mus3|LINE|L1	358384	NR_045995	76311	Mm.367129	NR_045995	ENSMUSG00000097616	1110019D14Rik	RIKEN cDNA 1110019D14 gene	ncRNA
chr6-11648	chr6	14237252	14243034	+	40.8	5782	Intergenic	Intergenic	368574	NR_045995	76311	Mm.367129	NR_045995	ENSMUSG00000097616	1110019D14Rik	RIKEN cDNA 1110019D14 gene	ncRNA
chr6-4917	chr6	14296114	14299956	+	36.2	3842	Intergenic	Intergenic	426466	NR_045995	76311	Mm.367129	NR_045995	ENSMUSG00000097616	1110019D14Rik	RIKEN cDNA 1110019D14 gene	ncRNA
chr6-9822	chr6	14192584	14197033	+	33.5	4449	Intergenic	ORR1C1-int|LTR|ERVL-MaLR	323239	NR_045995	76311	Mm.367129	NR_045995	ENSMUSG00000097616	1110019D14Rik	RIKEN cDNA 1110019D14 gene	ncRNA
chr6-9826	chr6	14220527	14224894	+	33.1	4367	Intergenic	Intergenic	351141	NR_045995	76311	Mm.367129	NR_045995	ENSMUSG00000097616	1110019D14Rik	RIKEN cDNA 1110019D14 gene	ncRNA
chr6-4115	chr6	14280248	14283772	+	29.1	3524	Intergenic	L1_Mur3|LINE|L1	410441	NR_045995	76311	Mm.367129	NR_045995	ENSMUSG00000097616	1110019D14Rik	RIKEN cDNA 1110019D14 gene	ncRNA
chr6-9830	chr6	14265800	14269267	+	28.2	3467	Intergenic	Intergenic	395964	NR_045995	76311	Mm.367129	NR_045995	ENSMUSG00000097616	1110019D14Rik	RIKEN cDNA 1110019D14 gene	ncRNA
chr6-9831	chr6	14272876	14276170	+	27.6	3294	Intergenic	L1_Mus3|LINE|L1	402954	NR_045995	76311	Mm.367129	NR_045995	ENSMUSG00000097616	1110019D14Rik	RIKEN cDNA 1110019D14 gene	ncRNA
chr6-1221	chr6	14290721	14294077	+	26.9	3356	Intergenic	RLTR16|LTR|ERVK	420830	NR_045995	76311	Mm.367129	NR_045995	ENSMUSG00000097616	1110019D14Rik	RIKEN cDNA 1110019D14 gene	ncRNA
chr6-9819	chr6	14093066	14095897	+	26	2831	Intergenic	Intergenic	222912	NR_045995	76311	Mm.367129	NR_045995	ENSMUSG00000097616	1110019D14Rik	RIKEN cDNA 1110019D14 gene	ncRNA
chr6-5825	chr6	14081914	14084799	+	23.6	2885	Intergenic	Intergenic	211787	NR_045995	76311	Mm.367129	NR_045995	ENSMUSG00000097616	1110019D14Rik	RIKEN cDNA 1110019D14 gene	ncRNA
chr6-4111	chr6	14130584	14133360	+	22	2776	Intergenic	Intergenic	260403	NR_045995	76311	Mm.367129	NR_045995	ENSMUSG00000097616	1110019D14Rik	RIKEN cDNA 1110019D14 gene	ncRNA
chr6-8260	chr6	14260911	14263378	+	21.6	2467	Intergenic	Lx6|LINE|L1	390575	NR_045995	76311	Mm.367129	NR_045995	ENSMUSG00000097616	1110019D14Rik	RIKEN cDNA 1110019D14 gene	ncRNA
chr6-1714	chr6	14076320	14078700	+	21.2	2380	Intergenic	ORR1A2|LTR|ERVL-MaLR	205941	NR_045995	76311	Mm.367129	NR_045995	ENSMUSG00000097616	1110019D14Rik	RIKEN cDNA 1110019D14 gene	ncRNA
chr6-8253	chr6	14118780	14120921	+	17.8	2141	Intergenic	Intergenic	248281	NR_045995	76311	Mm.367129	NR_045995	ENSMUSG00000097616	1110019D14Rik	RIKEN cDNA 1110019D14 gene	ncRNA
chr6-4906	chr6	14035857	14037936	+	17.6	2079	Intergenic	Lx3_Mus|LINE|L1	165327	NR_045995	76311	Mm.367129	NR_045995	ENSMUSG00000097616	1110019D14Rik	RIKEN cDNA 1110019D14 gene	ncRNA
chr6-6920	chr6	14098912	14100505	+	13.9	1593	Intergenic	Intergenic	228139	NR_045995	76311	Mm.367129	NR_045995	ENSMUSG00000097616	1110019D14Rik	RIKEN cDNA 1110019D14 gene	ncRNA
chr6-1719	chr6	14287340	14288648	+	12.4	1308	Intergenic	Intergenic	416425	NR_045995	76311	Mm.367129	NR_045995	ENSMUSG00000097616	1110019D14Rik	RIKEN cDNA 1110019D14 gene	ncRNA
chr6-8255	chr6	14151662	14152988	+	11	1326	Intergenic	IAPEY3_LTR|LTR|ERVK	280756	NR_045995	76311	Mm.367129	NR_045995	ENSMUSG00000097616	1110019D14Rik	RIKEN cDNA 1110019D14 gene	ncRNA
chr6-11640	chr6	14141355	14142607	+	9.15	1252	Intergenic	Intergenic	270412	NR_045995	76311	Mm.367129	NR_045995	ENSMUSG00000097616	1110019D14Rik	RIKEN cDNA 1110019D14 gene	ncRNA
chr6-5824	chr6	13929437	13930437	+	8.79	1000	Intergenic	Lx|LINE|L1	58368	NR_045995	76311	Mm.367129	NR_045995	ENSMUSG00000097616	1110019D14Rik	RIKEN cDNA 1110019D14 gene	ncRNA
chr6-9825	chr6	14215638	14216638	+	8.42	1000	Intergenic	Intergenic	344569	NR_045995	76311	Mm.367129	NR_045995	ENSMUSG00000097616	1110019D14Rik	RIKEN cDNA 1110019D14 gene	ncRNA
chr6-8258	chr6	14207930	14208930	+	8.42	1000	Intergenic	Intergenic	336861	NR_045995	76311	Mm.367129	NR_045995	ENSMUSG00000097616	1110019D14Rik	RIKEN cDNA 1110019D14 gene	ncRNA
chr6-9818	chr6	14053085	14054085	+	8.05	1000	Intergenic	Lx7|LINE|L1	182016	NR_045995	76311	Mm.367129	NR_045995	ENSMUSG00000097616	1110019D14Rik	RIKEN cDNA 1110019D14 gene	ncRNA
chr6-11651	chr6	14306931	14307931	+	8.05	1000	Intergenic	Intergenic	435862	NR_045995	76311	Mm.367129	NR_045995	ENSMUSG00000097616	1110019D14Rik	RIKEN cDNA 1110019D14 gene	ncRNA
chr6-11643	chr6	14200960	14201960	+	7.87	1000	Intergenic	Lx3A|LINE|L1	329891	NR_045995	76311	Mm.367129	NR_045995	ENSMUSG00000097616	1110019D14Rik	RIKEN cDNA 1110019D14 gene	ncRNA
chr16-6317	chr16	89077517	89091906	+	110	14389	Intergenic	Intergenic	-20709	NM_001276278	68637	Mm.384089	NM_001276278	ENSMUSG00000068073	1110025L11Rik	RIKEN cDNA 1110025L11 gene	protein-coding
chr16-7588	chr16	89063944	89069432	+	42.8	5488	Intergenic	Lx9|LINE|L1	-2686	NM_001276278	68637	Mm.384089	NM_001276278	ENSMUSG00000068073	1110025L11Rik	RIKEN cDNA 1110025L11 gene	protein-coding
chr16-1659	chr16	89109996	89114140	+	34.2	4144	Intergenic	Intergenic	-48066	NM_001276278	68637	Mm.384089	NM_001276278	ENSMUSG00000068073	1110025L11Rik	RIKEN cDNA 1110025L11 gene	protein-coding
chr16-6315	chr16	89073036	89075864	+	22	2828	Intergenic	Intergenic	-10448	NM_001276278	68637	Mm.384089	NM_001276278	ENSMUSG00000068073	1110025L11Rik	RIKEN cDNA 1110025L11 gene	protein-coding
chr16-4316	chr16	89057044	89059419	+	20.7	2375	Intergenic	Intergenic	5771	NM_001276278	68637	Mm.384089	NM_001276278	ENSMUSG00000068073	1110025L11Rik	RIKEN cDNA 1110025L11 gene	protein-coding
chr16-2000	chr16	89096830	89099034	+	18.7	2204	Intergenic	L1MDa|LINE|L1	-33930	NM_001276278	68637	Mm.384089	NM_001276278	ENSMUSG00000068073	1110025L11Rik	RIKEN cDNA 1110025L11 gene	protein-coding
chr16-4320	chr16	89123362	89125462	+	18.5	2100	Intergenic	Intergenic	-60410	NM_001276278	68637	Mm.384089	NM_001276278	ENSMUSG00000068073	1110025L11Rik	RIKEN cDNA 1110025L11 gene	protein-coding
chr16-4321	chr16	89129463	89130852	+	10.8	1389	Intergenic	Intergenic	-66155	NM_001276278	68637	Mm.384089	NM_001276278	ENSMUSG00000068073	1110025L11Rik	RIKEN cDNA 1110025L11 gene	protein-coding
chr16-3569	chr16	89116366	89117620	+	10.4	1254	Intergenic	L1_Mus1|LINE|L1	-52991	NM_001276278	68637	Mm.384089	NM_001276278	ENSMUSG00000068073	1110025L11Rik	RIKEN cDNA 1110025L11 gene	protein-coding
chr16-2939	chr16	89119340	89120340	+	8.6	1000	Intergenic	L1_Mus1|LINE|L1	-55838	NM_001276278	68637	Mm.384089	NM_001276278	ENSMUSG00000068073	1110025L11Rik	RIKEN cDNA 1110025L11 gene	protein-coding
chr11-8016	chr11	87711755	87713228	+	12.6	1473	intron (NM_172448, intron 2 of 9)	intron (NM_172448, intron 2 of 9)	12967	NR_045139	68690	Mm.342009	NR_045139		1110028F11Rik	RIKEN cDNA 1110028F11 gene	ncRNA
chr17-8173	chr17	34954946	34956705	+	15.6	1759	TTS (NM_010478)	TTS (NM_010478)	-3354	NR_015536	68763	Mm.28895	NR_015536	ENSMUSG00000092203	1110038B12Rik	RIKEN cDNA 1110038B12 gene	ncRNA
chr15-2325	chr15	76958854	76962180	+	26.2	3326	Intergenic	RLTR13B1|LTR|ERVK	11973	NM_054099	117171	Mm.322968	NM_054099		1110038F14Rik	RIKEN cDNA 1110038F14 gene	protein-coding
chr16-3698	chr16	24397666	24399044	+	11.9	1378	intron (NM_178665, intron 1 of 12)	intron (NM_178665, intron 1 of 12)	-4700	NR_037954	68841	Mm.361995	NR_037954		1110054M08Rik	RIKEN cDNA 1110054M08 gene	ncRNA
chr12-4117	chr12	8189452	8194215	+	37.2	4763	Intergenic	Lx9|LINE|L1	-16274	NM_172401	68832	Mm.25608	NM_172401	ENSMUSG00000037669	1110057K04Rik	RIKEN cDNA 1110057K04 gene	protein-coding
chr12-5836	chr12	8170743	8171743	+	8.05	1000	Intergenic	ORR1F|LTR|ERVL-MaLR	-36864	NM_172401	68832	Mm.25608	NM_172401	ENSMUSG00000037669	1110057K04Rik	RIKEN cDNA 1110057K04 gene	protein-coding
chr9-2141	chr9	122938358	122939896	+	13.2	1538	Intergenic	MMSAT4|Satellite|Satellite	11873	NM_025419	66202	Mm.268307	NM_025419	ENSMUSG00000032551	1110059G10Rik	RIKEN cDNA 1110059G10 gene	protein-coding
chr9-6611	chr9	93833932	93842410	+	61.3	8478	Intergenic	ORR1A3-int|LTR|ERVL-MaLR	699910	NM_001033145	68861	Mm.258746	NM_001033145	ENSMUSG00000045414	1190002N15Rik	RIKEN cDNA 1190002N15 gene	protein-coding
chr9-9007	chr9	93802511	93806659	+	32.6	4148	Intergenic	MTB_Mm|LTR|ERVL-MaLR	733496	NM_001033145	68861	Mm.258746	NM_001033145	ENSMUSG00000045414	1190002N15Rik	RIKEN cDNA 1190002N15 gene	protein-coding
chr9-7783	chr9	93849388	93853336	+	28.2	3948	Intergenic	PB1D10|SINE|Alu	686719	NM_001033145	68861	Mm.258746	NM_001033145	ENSMUSG00000045414	1190002N15Rik	RIKEN cDNA 1190002N15 gene	protein-coding
chr9-9005	chr9	93792962	93796562	+	27.5	3600	Intergenic	Intergenic	743319	NM_001033145	68861	Mm.258746	NM_001033145	ENSMUSG00000045414	1190002N15Rik	RIKEN cDNA 1190002N15 gene	protein-coding
chr9-6609	chr9	93784790	93788010	+	24.2	3220	Intergenic	Intergenic	751681	NM_001033145	68861	Mm.258746	NM_001033145	ENSMUSG00000045414	1190002N15Rik	RIKEN cDNA 1190002N15 gene	protein-coding
chr9-7787	chr9	93930390	93933629	+	24.2	3239	Intergenic	RMER6C|LTR|ERVK	606072	NM_001033145	68861	Mm.258746	NM_001033145	ENSMUSG00000045414	1190002N15Rik	RIKEN cDNA 1190002N15 gene	protein-coding
chr9-6613	chr9	93954327	93957056	+	21.8	2729	Intergenic	Intergenic	582390	NM_001033145	68861	Mm.258746	NM_001033145	ENSMUSG00000045414	1190002N15Rik	RIKEN cDNA 1190002N15 gene	protein-coding
chr9-7785	chr9	93908174	93910828	+	20.9	2654	Intergenic	Intergenic	628580	NM_001033145	68861	Mm.258746	NM_001033145	ENSMUSG00000045414	1190002N15Rik	RIKEN cDNA 1190002N15 gene	protein-coding
chr9-4727	chr9	93819532	93821716	+	17.9	2184	Intergenic	Intergenic	717457	NM_001033145	68861	Mm.258746	NM_001033145	ENSMUSG00000045414	1190002N15Rik	RIKEN cDNA 1190002N15 gene	protein-coding
chr9-4732	chr9	93967682	93969266	+	14.1	1584	Intergenic	Intergenic	569607	NM_001033145	68861	Mm.258746	NM_001033145	ENSMUSG00000045414	1190002N15Rik	RIKEN cDNA 1190002N15 gene	protein-coding
chr9-7789	chr9	94041659	94043324	+	13.5	1665	Intergenic	L1VL4|LINE|L1	495590	NM_001033145	68861	Mm.258746	NM_001033145	ENSMUSG00000045414	1190002N15Rik	RIKEN cDNA 1190002N15 gene	protein-coding
chr9-9019	chr9	94082807	94084437	+	13.4	1630	Intergenic	Intergenic	454459	NM_001033145	68861	Mm.258746	NM_001033145	ENSMUSG00000045414	1190002N15Rik	RIKEN cDNA 1190002N15 gene	protein-coding
chr9-6615	chr9	94048080	94049546	+	11.9	1466	Intergenic	(GGAGAA)n|Simple_repeat|Simple_repeat	489268	NM_001033145	68861	Mm.258746	NM_001033145	ENSMUSG00000045414	1190002N15Rik	RIKEN cDNA 1190002N15 gene	protein-coding
chr9-9024	chr9	94306314	94307738	+	11.9	1424	Intergenic	Intergenic	231055	NM_001033145	68861	Mm.258746	NM_001033145	ENSMUSG00000045414	1190002N15Rik	RIKEN cDNA 1190002N15 gene	protein-coding
chr9-4736	chr9	94393746	94395262	+	11.7	1516	Intergenic	MLTR11B|LTR|ERVK	143577	NM_001033145	68861	Mm.258746	NM_001033145	ENSMUSG00000045414	1190002N15Rik	RIKEN cDNA 1190002N15 gene	protein-coding
chr9-4734	chr9	94147405	94148659	+	10.8	1254	Intergenic	Intergenic	390049	NM_001033145	68861	Mm.258746	NM_001033145	ENSMUSG00000045414	1190002N15Rik	RIKEN cDNA 1190002N15 gene	protein-coding
chr9-6608	chr9	93772235	93773507	+	10.3	1272	Intergenic	RMER2|LTR|ERV1	765210	NM_001033145	68861	Mm.258746	NM_001033145	ENSMUSG00000045414	1190002N15Rik	RIKEN cDNA 1190002N15 gene	protein-coding
chr9-4729	chr9	93897595	93898875	+	9.88	1280	Intergenic	Lx10|LINE|L1	639846	NM_001033145	68861	Mm.258746	NM_001033145	ENSMUSG00000045414	1190002N15Rik	RIKEN cDNA 1190002N15 gene	protein-coding
chr9-2445	chr9	93996285	93997285	+	9.15	1000	Intergenic	Intergenic	541296	NM_001033145	68861	Mm.258746	NM_001033145	ENSMUSG00000045414	1190002N15Rik	RIKEN cDNA 1190002N15 gene	protein-coding
chr9-4037	chr9	94318130	94319130	+	8.97	1000	Intergenic	Intergenic	219451	NM_001033145	68861	Mm.258746	NM_001033145	ENSMUSG00000045414	1190002N15Rik	RIKEN cDNA 1190002N15 gene	protein-coding
chr9-5619	chr9	93940040	93941040	+	8.79	1000	Intergenic	Intergenic	597541	NM_001033145	68861	Mm.258746	NM_001033145	ENSMUSG00000045414	1190002N15Rik	RIKEN cDNA 1190002N15 gene	protein-coding
chr9-5623	chr9	94290522	94291522	+	8.79	1000	Intergenic	Intergenic	247059	NM_001033145	68861	Mm.258746	NM_001033145	ENSMUSG00000045414	1190002N15Rik	RIKEN cDNA 1190002N15 gene	protein-coding
chr9-6616	chr9	94245087	94246087	+	8.6	1000	Intergenic	Intergenic	292494	NM_001033145	68861	Mm.258746	NM_001033145	ENSMUSG00000045414	1190002N15Rik	RIKEN cDNA 1190002N15 gene	protein-coding
chr9-4730	chr9	93918471	93919471	+	8.6	1000	Intergenic	Intergenic	619110	NM_001033145	68861	Mm.258746	NM_001033145	ENSMUSG00000045414	1190002N15Rik	RIKEN cDNA 1190002N15 gene	protein-coding
chr9-9016	chr9	93975224	93976224	+	8.42	1000	Intergenic	Intergenic	562357	NM_001033145	68861	Mm.258746	NM_001033145	ENSMUSG00000045414	1190002N15Rik	RIKEN cDNA 1190002N15 gene	protein-coding
chr9-7792	chr9	94094055	94095055	+	8.42	1000	Intergenic	Intergenic	443526	NM_001033145	68861	Mm.258746	NM_001033145	ENSMUSG00000045414	1190002N15Rik	RIKEN cDNA 1190002N15 gene	protein-coding
chr9-5618	chr9	93925194	93926194	+	8.42	1000	Intergenic	Intergenic	612387	NM_001033145	68861	Mm.258746	NM_001033145	ENSMUSG00000045414	1190002N15Rik	RIKEN cDNA 1190002N15 gene	protein-coding
chr9-9025	chr9	94350521	94351521	+	8.24	1000	Intergenic	Intergenic	187060	NM_001033145	68861	Mm.258746	NM_001033145	ENSMUSG00000045414	1190002N15Rik	RIKEN cDNA 1190002N15 gene	protein-coding
chr9-5621	chr9	93987772	93988772	+	8.24	1000	Intergenic	MTD|LTR|ERVL-MaLR	549809	NM_001033145	68861	Mm.258746	NM_001033145	ENSMUSG00000045414	1190002N15Rik	RIKEN cDNA 1190002N15 gene	protein-coding
chr9-7791	chr9	94087300	94088300	+	8.24	1000	Intergenic	Intergenic	450281	NM_001033145	68861	Mm.258746	NM_001033145	ENSMUSG00000045414	1190002N15Rik	RIKEN cDNA 1190002N15 gene	protein-coding
chr9-6618	chr9	94435364	94436364	+	8.24	1000	Intergenic	Intergenic	102217	NM_001033145	68861	Mm.258746	NM_001033145	ENSMUSG00000045414	1190002N15Rik	RIKEN cDNA 1190002N15 gene	protein-coding
chr9-9022	chr9	94179668	94180668	+	8.05	1000	Intergenic	MTD|LTR|ERVL-MaLR	357913	NM_001033145	68861	Mm.258746	NM_001033145	ENSMUSG00000045414	1190002N15Rik	RIKEN cDNA 1190002N15 gene	protein-coding
chr9-9014	chr9	93905633	93906633	+	8.05	1000	Intergenic	RLTR15|LTR|ERVK	631948	NM_001033145	68861	Mm.258746	NM_001033145	ENSMUSG00000045414	1190002N15Rik	RIKEN cDNA 1190002N15 gene	protein-coding
chr9-9027	chr9	94489068	94490068	+	8.05	1000	Intergenic	Intergenic	48513	NM_001033145	68861	Mm.258746	NM_001033145	ENSMUSG00000045414	1190002N15Rik	RIKEN cDNA 1190002N15 gene	protein-coding
chr9-9026	chr9	94461524	94462524	+	8.05	1000	Intergenic	ID_B1|SINE|B4	76057	NM_001033145	68861	Mm.258746	NM_001033145	ENSMUSG00000045414	1190002N15Rik	RIKEN cDNA 1190002N15 gene	protein-coding
chr9-9028	chr9	94573617	94574617	+	8.05	1000	Intergenic	L1M3|LINE|L1	-36036	NM_001033145	68861	Mm.258746	NM_001033145	ENSMUSG00000045414	1190002N15Rik	RIKEN cDNA 1190002N15 gene	protein-coding
chr9-9021	chr9	94170172	94171172	+	8.05	1000	Intergenic	Intergenic	367409	NM_001033145	68861	Mm.258746	NM_001033145	ENSMUSG00000045414	1190002N15Rik	RIKEN cDNA 1190002N15 gene	protein-coding
chr9-9017	chr9	94032140	94033140	+	7.87	1000	Intergenic	RMER13A|LTR|ERVK	505441	NM_001033145	68861	Mm.258746	NM_001033145	ENSMUSG00000045414	1190002N15Rik	RIKEN cDNA 1190002N15 gene	protein-coding
chr9-9023	chr9	94300734	94301734	+	7.87	1000	Intergenic	Intergenic	236847	NM_001033145	68861	Mm.258746	NM_001033145	ENSMUSG00000045414	1190002N15Rik	RIKEN cDNA 1190002N15 gene	protein-coding
chr13-8334	chr13	64560558	64561558	+	8.24	1000	Intergenic	Intergenic	-63266	NM_001195435	68880	Mm.390594	NM_001195435	ENSMUSG00000096537	1190003K10Rik	RIKEN cDNA 1190003K10 gene	protein-coding
chr13-8333	chr13	64510148	64511148	+	8.05	1000	Intergenic	Intergenic	-12856	NM_001195435	68880	Mm.390594	NM_001195435	ENSMUSG00000096537	1190003K10Rik	RIKEN cDNA 1190003K10 gene	protein-coding
chr8-3041	chr8	120608846	120615878	+	71.4	7032	intron (NM_197988, intron 2 of 3)	intron (NM_197988, intron 2 of 3)	22020	NM_197988	68918	Mm.473736	NM_197988	ENSMUSG00000043687	1190005I06Rik	RIKEN cDNA 1190005I06 gene	protein-coding
chr8-8868	chr8	120621608	120625386	+	26.4	3778	intron (NM_197988, intron 2 of 3)	IMPB_01|Satellite|Satellite	10885	NM_197988	68918	Mm.473736	NM_197988	ENSMUSG00000043687	1190005I06Rik	RIKEN cDNA 1190005I06 gene	protein-coding
chr8-8870	chr8	120630852	120633745	+	22.9	2893	intron (NM_197988, intron 1 of 3)	intron (NM_197988, intron 1 of 3)	2084	NM_197988	68918	Mm.473736	NM_197988	ENSMUSG00000043687	1190005I06Rik	RIKEN cDNA 1190005I06 gene	protein-coding
chr8-3634	chr8	120635646	120636646	+	8.97	1000	Intergenic	Intergenic	-1764	NM_197988	68918	Mm.473736	NM_197988	ENSMUSG00000043687	1190005I06Rik	RIKEN cDNA 1190005I06 gene	protein-coding
chr8-6194	chr8	120628258	120629258	+	8.42	1000	intron (NM_197988, intron 1 of 3)	intron (NM_197988, intron 1 of 3)	5624	NM_197988	68918	Mm.473736	NM_197988	ENSMUSG00000043687	1190005I06Rik	RIKEN cDNA 1190005I06 gene	protein-coding
chr10-8454	chr10	82577629	82580562	+	22.7	2933	Intergenic	Lx|LINE|L1	44133	NM_001135568	544717	Mm.334867	NM_001135567	ENSMUSG00000063320	1190007I07Rik	RIKEN cDNA 1190007I07 gene	protein-coding
chr9-1307	chr9	103266937	103269126	+	22.5	2189	intron (NM_027918, intron 9 of 16)	intron (NM_027918, intron 9 of 16)	20266	NM_027918	71775	Mm.18802	NM_027918	ENSMUSG00000033688	1300017J02Rik	RIKEN cDNA 1300017J02 gene	protein-coding
chr10-8467	chr10	83713229	83718929	+	32.6	5700	Intergenic	L1Md_T|LINE|L1	-6786	NM_001145198	69784	Mm.271188	NM_001145198	ENSMUSG00000087651	1500009L16Rik	RIKEN cDNA 1500009L16 gene	protein-coding
chr10-982	chr10	83804855	83806108	+	11.9	1253	Intergenic	Intergenic	82616	NM_001145198	69784	Mm.271188	NM_001145198	ENSMUSG00000087651	1500009L16Rik	RIKEN cDNA 1500009L16 gene	protein-coding
chr1-12380	chr1	43614978	43617559	+	20.9	2581	Intergenic	Intergenic	-114334	NM_024283	78896	Mm.50109	NM_024283	ENSMUSG00000026051	1500015O10Rik	RIKEN cDNA 1500015O10 gene	protein-coding
chr1-14590	chr1	43686474	43687474	+	8.05	1000	Intergenic	ORR1D1|LTR|ERVL-MaLR	-43628	NM_024283	78896	Mm.50109	NM_024283	ENSMUSG00000026051	1500015O10Rik	RIKEN cDNA 1500015O10 gene	protein-coding
chr16-2978	chr16	95817375	95818375	+	8.79	1000	Intergenic	Intergenic	80838	NR_040485	69776	Mm.120470	NR_040484	ENSMUSG00000086899	1600002D24Rik	RIKEN cDNA 1600002D24 gene	ncRNA
chr7-5736	chr7	38171581	38174819	+	22.9	3238	Intergenic	B3|SINE|B2	-10017	NM_001085385	72244	Mm.187554	NM_028166		1600014C10Rik	RIKEN cDNA 1600014C10 gene	protein-coding
chr7-13821	chr7	38150343	38151343	+	7.69	1000	Intergenic	Intergenic	-32374	NM_001085385	72244	Mm.187554	NM_028166		1600014C10Rik	RIKEN cDNA 1600014C10 gene	protein-coding
chr17-9658	chr17	45847195	45850911	+	27.1	3716	Intergenic	Intergenic	-115209	NM_028164	72240	Mm.482897	NM_028164	ENSMUSG00000094690	1600014C23Rik	RIKEN cDNA 1600014C23 gene	protein-coding
chr17-7272	chr17	45868692	45870560	+	16.5	1868	Intergenic	Intergenic	-135782	NM_028164	72240	Mm.482897	NM_028164	ENSMUSG00000094690	1600014C23Rik	RIKEN cDNA 1600014C23 gene	protein-coding
chr17-4714	chr17	45760248	45761843	+	13.5	1595	Intergenic	Intergenic	-27201	NM_028164	72240	Mm.482897	NM_028164	ENSMUSG00000094690	1600014C23Rik	RIKEN cDNA 1600014C23 gene	protein-coding
chr17-4715	chr17	45864666	45865957	+	10.6	1291	Intergenic	Intergenic	-131467	NM_028164	72240	Mm.482897	NM_028164	ENSMUSG00000094690	1600014C23Rik	RIKEN cDNA 1600014C23 gene	protein-coding
chr17-9657	chr17	45719893	45720893	+	7.87	1000	Intergenic	ORR1B1|LTR|ERVL-MaLR	13451	NM_028164	72240	Mm.482897	NM_028164	ENSMUSG00000094690	1600014C23Rik	RIKEN cDNA 1600014C23 gene	protein-coding
chr5-9434	chr5	45664110	45665110	+	8.97	1000	Intergenic	RLTR17D_Mm|LTR|ERVK	5098	NR_073433	69788	Mm.381492	NR_073433		1600023N17Rik	RIKEN cDNA 1600023N17 gene	ncRNA
chr8-5070	chr8	103120564	103121564	+	8.79	1000	Intergenic	Lx5c|LINE|L1	226470	NR_036588	69794	Mm.396139	NR_036588		1600027J07Rik	RIKEN cDNA 1600027J07 gene	ncRNA
chr8-5071	chr8	103288682	103289682	+	8.79	1000	Intergenic	Intergenic	58352	NR_036588	69794	Mm.396139	NR_036588		1600027J07Rik	RIKEN cDNA 1600027J07 gene	ncRNA
chr8-6070	chr8	103068237	103069237	+	8.6	1000	Intergenic	Intergenic	278797	NR_036588	69794	Mm.396139	NR_036588		1600027J07Rik	RIKEN cDNA 1600027J07 gene	ncRNA
chr8-6071	chr8	103341615	103342615	+	8.6	1000	Intergenic	Intergenic	5419	NR_036588	69794	Mm.396139	NR_036588		1600027J07Rik	RIKEN cDNA 1600027J07 gene	ncRNA
chr8-8664	chr8	103077832	103078832	+	8.05	1000	Intergenic	Intergenic	269202	NR_036588	69794	Mm.396139	NR_036588		1600027J07Rik	RIKEN cDNA 1600027J07 gene	ncRNA
chr8-7233	chr8	103247743	103248743	+	7.87	1000	Intergenic	Lx3_Mus|LINE|L1	99291	NR_036588	69794	Mm.396139	NR_036588		1600027J07Rik	RIKEN cDNA 1600027J07 gene	ncRNA
chr5-16539	chr5	30483736	30484736	+	8.42	1000	TTS (NM_029285)	TTS (NM_029285)	18159	NM_029285	75434	Mm.332291	NM_029285	ENSMUSG00000029182	1700001C02Rik	RIKEN cDNA 1700001C02 gene	protein-coding
chr17-9677	chr17	47415030	47416030	+	8.05	1000	promoter-TSS (NM_001172091)	promoter-TSS (NM_001172091)	-819	NM_001172091	75462	Mm.46129	NM_029296	ENSMUSG00000047150	1700001C19Rik	RIKEN cDNA 1700001C19 gene	protein-coding
chr14-489	chr14	43327915	43334416	+	66.3	6501	Intergenic	L1Md_F|LINE|L1	16646	NM_027940	71826	Mm.335855	NM_027940	ENSMUSG00000095384	1700001F09Rik	RIKEN cDNA 1700001F09 gene	protein-coding
chr14-233	chr14	43273954	43279763	+	61.3	5809	Intergenic	Intergenic	70953	NM_027940	71826	Mm.335855	NM_027940	ENSMUSG00000095384	1700001F09Rik	RIKEN cDNA 1700001F09 gene	protein-coding
chr14-59	chr14	43355289	43361322	+	56	6033	Intergenic	L1MA5A|LINE|L1	-10494	NM_027940	71826	Mm.335855	NM_027940	ENSMUSG00000095384	1700001F09Rik	RIKEN cDNA 1700001F09 gene	protein-coding
chr14-72	chr14	43318991	43321133	+	32.6	2142	Intergenic	Intergenic	27749	NM_027940	71826	Mm.335855	NM_027940	ENSMUSG00000095384	1700001F09Rik	RIKEN cDNA 1700001F09 gene	protein-coding
chr14-267	chr14	43261569	43264014	+	21.6	2445	Intergenic	Intergenic	85020	NM_027940	71826	Mm.335855	NM_027940	ENSMUSG00000095384	1700001F09Rik	RIKEN cDNA 1700001F09 gene	protein-coding
chr14-901	chr14	43339062	43341490	+	20.9	2428	Intergenic	L1_Mus3|LINE|L1	7535	NM_027940	71826	Mm.335855	NM_027940	ENSMUSG00000095384	1700001F09Rik	RIKEN cDNA 1700001F09 gene	protein-coding
chr14-1113	chr14	43255857	43257711	+	20.1	1854	Intergenic	Intergenic	91027	NM_027940	71826	Mm.335855	NM_027940	ENSMUSG00000095384	1700001F09Rik	RIKEN cDNA 1700001F09 gene	protein-coding
chr14-6489	chr14	43251697	43253722	+	16.3	2025	Intergenic	Intergenic	95102	NM_027940	71826	Mm.335855	NM_027940	ENSMUSG00000095384	1700001F09Rik	RIKEN cDNA 1700001F09 gene	protein-coding
chr14-73	chr14	43324235	43325535	+	12.8	1300	Intergenic	(TAGTG)n|Simple_repeat|Simple_repeat	22926	NM_027940	71826	Mm.335855	NM_027940	ENSMUSG00000095384	1700001F09Rik	RIKEN cDNA 1700001F09 gene	protein-coding
chr14-899	chr14	43292891	43293891	+	10.1	1000	Intergenic	Intergenic	54420	NM_027940	71826	Mm.335855	NM_027940	ENSMUSG00000095384	1700001F09Rik	RIKEN cDNA 1700001F09 gene	protein-coding
chr14-4452	chr14	43304520	43305520	+	8.79	1000	Intergenic	Intergenic	42791	NM_027940	71826	Mm.335855	NM_027940	ENSMUSG00000095384	1700001F09Rik	RIKEN cDNA 1700001F09 gene	protein-coding
chr14-5387	chr14	43364482	43365482	+	8.6	1000	Intergenic	L1Md_A|LINE|L1	-17171	NM_027940	71826	Mm.335855	NM_027940	ENSMUSG00000095384	1700001F09Rik	RIKEN cDNA 1700001F09 gene	protein-coding
chr14-3667	chr14	43348643	43349643	+	7.87	1000	Intergenic	RLTR14-int|LTR|ERV1	-1332	NM_027940	71826	Mm.335855	NM_027940	ENSMUSG00000095384	1700001F09Rik	RIKEN cDNA 1700001F09 gene	protein-coding
chr1-14513	chr1	33687134	33689873	+	20.7	2739	Intergenic	B4A|SINE|B4	18679	NR_033199	67503	Mm.87069	NM_026204	ENSMUSG00000044744	1700001G17Rik	RIKEN cDNA 1700001G17 gene	ncRNA
chr5-9133	chr5	146134996	146140390	+	40.8	5394	Intergenic	L1VL4|LINE|L1	47611	NM_001008547	69282	Mm.373573	NM_001008547	ENSMUSG00000095040	1700001J03Rik	RIKEN cDNA 1700001J03 gene	protein-coding
chr5-10617	chr5	146153831	146158134	+	32.4	4303	Intergenic	MTD|LTR|ERVL-MaLR	29322	NM_001008547	69282	Mm.373573	NM_001008547	ENSMUSG00000095040	1700001J03Rik	RIKEN cDNA 1700001J03 gene	protein-coding
chr5-9135	chr5	146181281	146184468	+	26.9	3187	intron (NM_001008547, intron 4 of 4)	intron (NM_001008547, intron 4 of 4)	2430	NM_001008547	69282	Mm.373573	NM_001008547	ENSMUSG00000095040	1700001J03Rik	RIKEN cDNA 1700001J03 gene	protein-coding
chr5-12180	chr5	146142000	146143514	+	12.4	1514	Intergenic	Intergenic	42547	NM_001008547	69282	Mm.373573	NM_001008547	ENSMUSG00000095040	1700001J03Rik	RIKEN cDNA 1700001J03 gene	protein-coding
chr9-7387	chr9	40058670	40059670	+	8.42	1000	Intergenic	Intergenic	8612	NR_033613	72224	Mm.235535	NR_033613		1700001J11Rik	ring finger protein 19A pseudogene	pseudo
chr13-6185	chr13	68706673	68707673	+	8.24	1000	intron (NM_153534, intron 14 of 24)	intron (NM_153534, intron 14 of 24)	109734	NM_027035	69315	Mm.272795	NM_027035	ENSMUSG00000021534	1700001L19Rik	RIKEN cDNA 1700001L19 gene	protein-coding
chr2-11409	chr2	30766025	30777613	+	95.5	11588	Intergenic	CpG	29918	NM_198000	73598	Mm.34166	NM_198000	ENSMUSG00000044320	1700001O22Rik	RIKEN cDNA 1700001O22 gene	protein-coding
chr2-11416	chr2	30796616	30800733	+	35	4117	intron (NM_198000, intron 3 of 6)	intron (NM_198000, intron 3 of 6)	3063	NM_198000	73598	Mm.34166	NM_198000	ENSMUSG00000044320	1700001O22Rik	RIKEN cDNA 1700001O22 gene	protein-coding
chr2-6005	chr2	30789992	30792485	+	20.5	2493	Intergenic	Intergenic	10499	NM_198000	73598	Mm.34166	NM_198000	ENSMUSG00000044320	1700001O22Rik	RIKEN cDNA 1700001O22 gene	protein-coding
chr2-3667	chr2	30802840	30805367	+	20.1	2527	promoter-TSS (NR_028487)	promoter-TSS (NR_028487)	-439	NR_028486	73598	Mm.34166	NM_198000	ENSMUSG00000044320	1700001O22Rik	RIKEN cDNA 1700001O22 gene	protein-coding
chr2-8319	chr2	30785810	30787974	+	17	2164	Intergenic	Intergenic	14845	NM_198000	73598	Mm.34166	NM_198000	ENSMUSG00000044320	1700001O22Rik	RIKEN cDNA 1700001O22 gene	protein-coding
chr6-7551	chr6	83157951	83160918	+	24	2967	intron (NM_027948, intron 1 of 3)	Lx7|LINE|L1	3030	NM_027948	71837	Mm.17621	NM_027948	ENSMUSG00000030030	1700003E16Rik	RIKEN cDNA 1700003E16 gene	protein-coding
chr3-6452	chr3	124890585	124898374	+	59.7	7789	Intergenic	Intergenic	-313388	NR_015460	384775	Mm.489851	NR_015460	ENSMUSG00000039174	1700003H04Rik	RIKEN cDNA 1700003H04 gene	ncRNA
chr3-15509	chr3	124745690	124749808	+	30.9	4118	Intergenic	Lx7|LINE|L1	-166658	NR_015460	384775	Mm.489851	NR_015460	ENSMUSG00000039174	1700003H04Rik	RIKEN cDNA 1700003H04 gene	ncRNA
chr3-4525	chr3	124766658	124769093	+	22.3	2435	Intergenic	L2|LINE|L2	-186784	NR_015460	384775	Mm.489851	NR_015460	ENSMUSG00000039174	1700003H04Rik	RIKEN cDNA 1700003H04 gene	ncRNA
chr3-3773	chr3	124511080	124513039	+	17.2	1959	Intergenic	L1M2|LINE|L1	69032	NR_015460	384775	Mm.489851	NR_015460	ENSMUSG00000039174	1700003H04Rik	RIKEN cDNA 1700003H04 gene	ncRNA
chr3-13074	chr3	124881992	124884085	+	15.9	2093	Intergenic	L1_Mus3|LINE|L1	-301947	NR_015460	384775	Mm.489851	NR_015460	ENSMUSG00000039174	1700003H04Rik	RIKEN cDNA 1700003H04 gene	ncRNA
chr3-13070	chr3	124761422	124763212	+	13.7	1790	Intergenic	ORR1B1-int|LTR|ERVL-MaLR	-181226	NR_015460	384775	Mm.489851	NR_015460	ENSMUSG00000039174	1700003H04Rik	RIKEN cDNA 1700003H04 gene	ncRNA
chr3-3774	chr3	124525189	124526487	+	12.3	1298	Intergenic	AT_rich|Low_complexity|Low_complexity	55253	NR_015460	384775	Mm.489851	NR_015460	ENSMUSG00000039174	1700003H04Rik	RIKEN cDNA 1700003H04 gene	ncRNA
chr3-13072	chr3	124844908	124846312	+	11.3	1404	Intergenic	Lx7|LINE|L1	-264519	NR_015460	384775	Mm.489851	NR_015460	ENSMUSG00000039174	1700003H04Rik	RIKEN cDNA 1700003H04 gene	ncRNA
chr3-6451	chr3	124879178	124880465	+	11	1287	Intergenic	L1_Mus3|LINE|L1	-298730	NR_015460	384775	Mm.489851	NR_015460	ENSMUSG00000039174	1700003H04Rik	RIKEN cDNA 1700003H04 gene	ncRNA
chr3-15513	chr3	124953187	124954691	+	11	1504	Intergenic	Intergenic	-372848	NR_015460	384775	Mm.489851	NR_015460	ENSMUSG00000039174	1700003H04Rik	RIKEN cDNA 1700003H04 gene	ncRNA
chr3-7769	chr3	124840619	124841920	+	10.4	1301	Intergenic	Intergenic	-260178	NR_015460	384775	Mm.489851	NR_015460	ENSMUSG00000039174	1700003H04Rik	RIKEN cDNA 1700003H04 gene	ncRNA
chr3-10987	chr3	124695802	124697092	+	9.33	1290	Intergenic	L1_Mus3|LINE|L1	-115356	NR_015460	384775	Mm.489851	NR_015460	ENSMUSG00000039174	1700003H04Rik	RIKEN cDNA 1700003H04 gene	ncRNA
chr3-7771	chr3	124947767	124948767	+	8.6	1000	Intergenic	ORR1F|LTR|ERVL-MaLR	-367176	NR_015460	384775	Mm.489851	NR_015460	ENSMUSG00000039174	1700003H04Rik	RIKEN cDNA 1700003H04 gene	ncRNA
chr3-10988	chr3	124869297	124870297	+	8.6	1000	Intergenic	L1_Mus4|LINE|L1	-288706	NR_015460	384775	Mm.489851	NR_015460	ENSMUSG00000039174	1700003H04Rik	RIKEN cDNA 1700003H04 gene	ncRNA
chr3-9181	chr3	124557674	124558674	+	8.42	1000	Intergenic	Intergenic	22917	NR_015460	384775	Mm.489851	NR_015460	ENSMUSG00000039174	1700003H04Rik	RIKEN cDNA 1700003H04 gene	ncRNA
chr3-15514	chr3	124963500	124964500	+	8.24	1000	Intergenic	RMER20C_Mm|LTR|ERVK	-382909	NR_015460	384775	Mm.489851	NR_015460	ENSMUSG00000039174	1700003H04Rik	RIKEN cDNA 1700003H04 gene	ncRNA
chr3-13079	chr3	124915716	124916716	+	8.05	1000	Intergenic	Intergenic	-335125	NR_015460	384775	Mm.489851	NR_015460	ENSMUSG00000039174	1700003H04Rik	RIKEN cDNA 1700003H04 gene	ncRNA
chr3-13080	chr3	124959586	124960586	+	8.05	1000	Intergenic	Lx6|LINE|L1	-378995	NR_015460	384775	Mm.489851	NR_015460	ENSMUSG00000039174	1700003H04Rik	RIKEN cDNA 1700003H04 gene	ncRNA
chr3-13065	chr3	124727841	124728841	+	7.87	1000	Intergenic	Intergenic	-147250	NR_015460	384775	Mm.489851	NR_015460	ENSMUSG00000039174	1700003H04Rik	RIKEN cDNA 1700003H04 gene	ncRNA
chr16-565	chr16	12531587	12533185	+	13.9	1598	Intergenic	MuLV-int|LTR|ERV1	-279004	NR_040507	75493	Mm.396146	NR_040507		1700003L19Rik	RIKEN cDNA 1700003L19 gene	ncRNA
chr16-4417	chr16	12415248	12416850	+	13.4	1602	Intergenic	Lx6|LINE|L1	-395341	NR_040507	75493	Mm.396146	NR_040507		1700003L19Rik	RIKEN cDNA 1700003L19 gene	ncRNA
chr4-11776	chr4	34714658	34720628	+	47	5970	intron (NM_027041, intron 8 of 10)	intron (NM_027041, intron 8 of 10)	12563	NM_027041	69329	Mm.389548	NM_027041	ENSMUSG00000028294	1700003M02Rik	RIKEN cDNA 1700003M02 gene	protein-coding
chr4-6461	chr4	34737643	34741956	+	36.2	4313	Intergenic	Intergenic	-9593	NM_027041	69329	Mm.389548	NM_027041	ENSMUSG00000028294	1700003M02Rik	RIKEN cDNA 1700003M02 gene	protein-coding
chr4-1629	chr4	34731626	34735816	+	34.8	4190	Intergenic	Intergenic	-3515	NM_027041	69329	Mm.389548	NM_027041	ENSMUSG00000028294	1700003M02Rik	RIKEN cDNA 1700003M02 gene	protein-coding
chr4-7499	chr4	34725701	34729160	+	28.4	3459	intron (NM_027041, intron 3 of 10)	Lx3_Mus|LINE|L1	2776	NM_027041	69329	Mm.389548	NM_027041	ENSMUSG00000028294	1700003M02Rik	RIKEN cDNA 1700003M02 gene	protein-coding
chr4-5224	chr4	129945900	129947496	+	13.5	1596	Intergenic	L2c|LINE|L2	-13676	NR_040647	72225	Mm.102193	NR_040647		1700003M07Rik	RIKEN cDNA 1700003M07 gene	ncRNA
chr4-12814	chr4	129955685	129957301	+	13.4	1616	Intergenic	Intergenic	-3881	NR_040647	72225	Mm.102193	NR_040647		1700003M07Rik	RIKEN cDNA 1700003M07 gene	ncRNA
chr13-7632	chr13	118530517	118531772	+	9.88	1255	Intergenic	RMER17A2|LTR|ERVK	-25024	NR_045982	75890	Mm.141235	NR_045982		1700003P14Rik	RIKEN cDNA 1700003P14 gene	ncRNA
chr13-5652	chr13	118518933	118519933	+	8.42	1000	Intergenic	L1_Mus3|LINE|L1	-36735	NR_045982	75890	Mm.141235	NR_045982		1700003P14Rik	RIKEN cDNA 1700003P14 gene	ncRNA
chr13-8887	chr13	118574539	118575539	+	7.87	1000	intron (NR_045982, intron 2 of 3)	L1MC1|LINE|L1	18871	NR_045982	75890	Mm.141235	NR_045982		1700003P14Rik	RIKEN cDNA 1700003P14 gene	ncRNA
chr3-15505	chr3	124487204	124492461	+	38.3	5257	Intergenic	LTR81C|LTR|Gypsy	-63804	NM_027939	71824	Mm.331353	NM_027939	ENSMUSG00000027973	1700006A11Rik	RIKEN cDNA 1700006A11 gene	protein-coding
chr3-15507	chr3	124498514	124500085	+	12.8	1571	Intergenic	Lx4A|LINE|L1	-73271	NM_027939	71824	Mm.331353	NM_027939	ENSMUSG00000027973	1700006A11Rik	RIKEN cDNA 1700006A11 gene	protein-coding
chr3-10985	chr3	124480176	124481543	+	11.2	1367	Intergenic	Intergenic	-54831	NM_027939	71824	Mm.331353	NM_027939	ENSMUSG00000027973	1700006A11Rik	RIKEN cDNA 1700006A11 gene	protein-coding
chr3-10983	chr3	124396122	124397503	+	10.6	1381	Intergenic	MER44B|DNA|TcMar-Tigger	29216	NM_027939	71824	Mm.331353	NM_027939	ENSMUSG00000027973	1700006A11Rik	RIKEN cDNA 1700006A11 gene	protein-coding
chr3-9178	chr3	124433184	124434451	+	9.52	1267	Intergenic	RLTR10E|LTR|ERVK	-7789	NM_027939	71824	Mm.331353	NM_027939	ENSMUSG00000027973	1700006A11Rik	RIKEN cDNA 1700006A11 gene	protein-coding
chr3-10984	chr3	124399765	124400765	+	8.42	1000	TTS (NM_027939)	TTS (NM_027939)	25763	NM_027939	71824	Mm.331353	NM_027939	ENSMUSG00000027973	1700006A11Rik	RIKEN cDNA 1700006A11 gene	protein-coding
chr11-9339	chr11	101985896	101992135	+	57.7	6239	intron (NM_029287, intron 3 of 5)	intron (NM_029287, intron 3 of 5)	1959	NM_029287	75437	Mm.108632	NM_029287	ENSMUSG00000010841	1700006E09Rik	RIKEN cDNA 1700006E09 gene	protein-coding
chr11-5583	chr11	102003848	102006595	+	22.3	2747	intron (NM_007863, intron 16 of 18)	intron (NM_007863, intron 16 of 18)	18165	NM_029287	75437	Mm.108632	NM_029287	ENSMUSG00000010841	1700006E09Rik	RIKEN cDNA 1700006E09 gene	protein-coding
chr11-4948	chr11	102000675	102002188	+	11	1513	intron (NM_007863, intron 18 of 18)	B4A|SINE|B4	14375	NM_029287	75437	Mm.108632	NM_029287	ENSMUSG00000010841	1700006E09Rik	RIKEN cDNA 1700006E09 gene	protein-coding
chr14-6201	chr14	119546601	119549946	+	29.5	3345	intron (NM_015820, intron 1 of 1)	intron (NM_015820, intron 1 of 1)	-200954	NR_045621	75432	Mm.443277	NR_045621		1700006F04Rik	RIKEN cDNA 1700006F04 gene	ncRNA
chr14-3470	chr14	119464038	119467048	+	24	3010	intron (NM_015820, intron 1 of 1)	intron (NM_015820, intron 1 of 1)	-283684	NR_045621	75432	Mm.443277	NR_045621		1700006F04Rik	RIKEN cDNA 1700006F04 gene	ncRNA
chr14-9131	chr14	119761387	119763562	+	17.8	2175	intron (NM_015820, intron 1 of 1)	intron (NM_015820, intron 1 of 1)	13247	NR_045621	75432	Mm.443277	NR_045621		1700006F04Rik	RIKEN cDNA 1700006F04 gene	ncRNA
chr14-5110	chr14	119476114	119478337	+	17.8	2223	intron (NM_015820, intron 1 of 1)	intron (NM_015820, intron 1 of 1)	-272002	NR_045621	75432	Mm.443277	NR_045621		1700006F04Rik	RIKEN cDNA 1700006F04 gene	ncRNA
chr14-7497	chr14	119765202	119766757	+	12.8	1555	intron (NM_015820, intron 1 of 1)	Lx2|LINE|L1	16752	NR_045621	75432	Mm.443277	NR_045621		1700006F04Rik	RIKEN cDNA 1700006F04 gene	ncRNA
chr14-4240	chr14	119800336	119801713	+	12.1	1377	intron (NM_015820, intron 1 of 1)	intron (NM_015820, intron 1 of 1)	51797	NR_045621	75432	Mm.443277	NR_045621		1700006F04Rik	RIKEN cDNA 1700006F04 gene	ncRNA
chr14-3472	chr14	119837979	119838979	+	9.15	1000	intron (NM_015820, intron 1 of 1)	intron (NM_015820, intron 1 of 1)	89252	NR_045621	75432	Mm.443277	NR_045621		1700006F04Rik	RIKEN cDNA 1700006F04 gene	ncRNA
chr14-5114	chr14	119857806	119858806	+	8.6	1000	intron (NM_015820, intron 1 of 1)	intron (NM_015820, intron 1 of 1)	109079	NR_045621	75432	Mm.443277	NR_045621		1700006F04Rik	RIKEN cDNA 1700006F04 gene	ncRNA
chr14-6204	chr14	119870535	119871535	+	8.42	1000	Intergenic	Intergenic	121808	NR_045621	75432	Mm.443277	NR_045621		1700006F04Rik	RIKEN cDNA 1700006F04 gene	ncRNA
chr14-9129	chr14	119590081	119591081	+	8.24	1000	intron (NM_015820, intron 1 of 1)	intron (NM_015820, intron 1 of 1)	-158646	NR_045621	75432	Mm.443277	NR_045621		1700006F04Rik	RIKEN cDNA 1700006F04 gene	ncRNA
chr14-9130	chr14	119738551	119739551	+	7.87	1000	intron (NM_015820, intron 1 of 1)	intron (NM_015820, intron 1 of 1)	-10176	NR_045621	75432	Mm.443277	NR_045621		1700006F04Rik	RIKEN cDNA 1700006F04 gene	ncRNA
chr14-9128	chr14	119447304	119448304	+	7.87	1000	intron (NM_015820, intron 1 of 1)	L1_Mur2|LINE|L1	-301423	NR_045621	75432	Mm.443277	NR_045621		1700006F04Rik	RIKEN cDNA 1700006F04 gene	ncRNA
chr14-7498	chr14	119847944	119848944	+	7.69	1000	intron (NM_015820, intron 1 of 1)	intron (NM_015820, intron 1 of 1)	99217	NR_045621	75432	Mm.443277	NR_045621		1700006F04Rik	RIKEN cDNA 1700006F04 gene	ncRNA
chr13-6480	chr13	107698194	107700809	+	20.7	2615	Intergenic	MLT1J|LTR|ERVL-MaLR	12104	NR_045900	72257	Mm.234155	NR_045900		1700006H21Rik	RIKEN cDNA 1700006H21 gene	ncRNA
chr13-3614	chr13	107643895	107645512	+	12.8	1617	Intergenic	Intergenic	-42694	NR_045900	72257	Mm.234155	NR_045900		1700006H21Rik	RIKEN cDNA 1700006H21 gene	ncRNA
chr13-8763	chr13	107589330	107590782	+	11.3	1452	Intergenic	Intergenic	-97341	NR_045900	72257	Mm.234155	NR_045900		1700006H21Rik	RIKEN cDNA 1700006H21 gene	ncRNA
chr13-7532	chr13	107635615	107636981	+	10.6	1366	Intergenic	MLT1D|LTR|ERVL-MaLR	-51099	NR_045900	72257	Mm.234155	NR_045900		1700006H21Rik	RIKEN cDNA 1700006H21 gene	ncRNA
chr13-7531	chr13	107617560	107618560	+	8.42	1000	Intergenic	Intergenic	-69337	NR_045900	72257	Mm.234155	NR_045900		1700006H21Rik	RIKEN cDNA 1700006H21 gene	ncRNA
chr13-7530	chr13	107586395	107587395	+	8.42	1000	Intergenic	Intergenic	-100502	NR_045900	72257	Mm.234155	NR_045900		1700006H21Rik	RIKEN cDNA 1700006H21 gene	ncRNA
chr8-1647	chr8	75698546	75707814	+	71.8	9268	intron (NM_027944, intron 7 of 12)	MYSERV16_I-int|LTR|ERVK	254486	NM_001164235	71831	Mm.443238	NM_027944	ENSMUSG00000031620	1700007B14Rik	RIKEN cDNA 1700007B14 gene	protein-coding
chr8-1170	chr8	75788240	75793581	+	45.2	5341	intron (NM_027944, intron 11 of 12)	L1MD3|LINE|L1	342216	NM_001164235	71831	Mm.443238	NM_027944	ENSMUSG00000031620	1700007B14Rik	RIKEN cDNA 1700007B14 gene	protein-coding
chr8-1168	chr8	75541478	75545077	+	26.9	3599	intron (NM_001164235, intron 2 of 13)	intron (NM_001164235, intron 2 of 13)	94583	NM_001164235	71831	Mm.443238	NM_027944	ENSMUSG00000031620	1700007B14Rik	RIKEN cDNA 1700007B14 gene	protein-coding
chr8-6971	chr8	75356730	75360025	+	26.4	3295	Intergenic	L1VL2|LINE|L1	-90317	NM_027944	71831	Mm.443238	NM_027944	ENSMUSG00000031620	1700007B14Rik	RIKEN cDNA 1700007B14 gene	protein-coding
chr8-5864	chr8	75529766	75533101	+	25.8	3335	intron (NM_001164235, intron 2 of 13)	intron (NM_001164235, intron 2 of 13)	82739	NM_001164235	71831	Mm.443238	NM_027944	ENSMUSG00000031620	1700007B14Rik	RIKEN cDNA 1700007B14 gene	protein-coding
chr8-4927	chr8	75817206	75820918	+	25.6	3712	intron (NM_027944, intron 11 of 12)	Tigger7|DNA|TcMar-Tigger	370368	NM_001164235	71831	Mm.443238	NM_027944	ENSMUSG00000031620	1700007B14Rik	RIKEN cDNA 1700007B14 gene	protein-coding
chr8-5867	chr8	75713607	75717131	+	24.5	3524	intron (NM_027944, intron 8 of 12)	L1MEa|LINE|L1	266675	NM_001164235	71831	Mm.443238	NM_027944	ENSMUSG00000031620	1700007B14Rik	RIKEN cDNA 1700007B14 gene	protein-coding
chr8-5871	chr8	75970469	75973513	+	23.4	3044	intron (NM_027944, intron 12 of 12)	intron (NM_027944, intron 12 of 12)	523297	NM_001164235	71831	Mm.443238	NM_027944	ENSMUSG00000031620	1700007B14Rik	RIKEN cDNA 1700007B14 gene	protein-coding
chr8-4928	chr8	75878143	75881005	+	21.6	2862	intron (NM_027944, intron 11 of 12)	MERV1_I-int|LTR|ERV1	430880	NM_001164235	71831	Mm.443238	NM_027944	ENSMUSG00000031620	1700007B14Rik	RIKEN cDNA 1700007B14 gene	protein-coding
chr8-6981	chr8	76113935	76116693	+	21.4	2758	Intergenic	Lx3_Mus|LINE|L1	666620	NM_001164235	71831	Mm.443238	NM_027944	ENSMUSG00000031620	1700007B14Rik	RIKEN cDNA 1700007B14 gene	protein-coding
chr8-5860	chr8	75412271	75415109	+	20.7	2838	Intergenic	RLTR45|LTR|ERVK	-35004	NM_027944	71831	Mm.443238	NM_027944	ENSMUSG00000031620	1700007B14Rik	RIKEN cDNA 1700007B14 gene	protein-coding
chr8-2388	chr8	76043583	76045720	+	18.9	2137	Intergenic	L1MD2|LINE|L1	595957	NM_001164235	71831	Mm.443238	NM_027944	ENSMUSG00000031620	1700007B14Rik	RIKEN cDNA 1700007B14 gene	protein-coding
chr8-5862	chr8	75456247	75458368	+	17.4	2121	intron (NM_027944, intron 1 of 12)	intron (NM_027944, intron 1 of 12)	8613	NM_001164235	71831	Mm.443238	NM_027944	ENSMUSG00000031620	1700007B14Rik	RIKEN cDNA 1700007B14 gene	protein-coding
chr8-2867	chr8	75999447	76001446	+	17	1999	Intergenic	MLT1C|LTR|ERVL-MaLR	551752	NM_001164235	71831	Mm.443238	NM_027944	ENSMUSG00000031620	1700007B14Rik	RIKEN cDNA 1700007B14 gene	protein-coding
chr8-1994	chr8	75869035	75870645	+	13.9	1610	intron (NM_027944, intron 11 of 12)	intron (NM_027944, intron 11 of 12)	421146	NM_001164235	71831	Mm.443238	NM_027944	ENSMUSG00000031620	1700007B14Rik	RIKEN cDNA 1700007B14 gene	protein-coding
chr8-2864	chr8	75830111	75831744	+	13.9	1633	intron (NM_027944, intron 11 of 12)	ORR1E|LTR|ERVL-MaLR	382233	NM_001164235	71831	Mm.443238	NM_027944	ENSMUSG00000031620	1700007B14Rik	RIKEN cDNA 1700007B14 gene	protein-coding
chr8-5861	chr8	75431049	75432581	+	12.3	1532	Intergenic	L1_Mur3|LINE|L1	-16879	NM_027944	71831	Mm.443238	NM_027944	ENSMUSG00000031620	1700007B14Rik	RIKEN cDNA 1700007B14 gene	protein-coding
chr8-3434	chr8	75521302	75522885	+	12.1	1583	intron (NM_001164235, intron 2 of 13)	Lx2|LINE|L1	73399	NM_001164235	71831	Mm.443238	NM_027944	ENSMUSG00000031620	1700007B14Rik	RIKEN cDNA 1700007B14 gene	protein-coding
chr8-2865	chr8	75904341	75905898	+	11.9	1557	intron (NM_027944, intron 12 of 12)	intron (NM_027944, intron 12 of 12)	456425	NM_001164235	71831	Mm.443238	NM_027944	ENSMUSG00000031620	1700007B14Rik	RIKEN cDNA 1700007B14 gene	protein-coding
chr8-6975	chr8	75603195	75604602	+	10.8	1407	intron (NM_027944, intron 4 of 12)	intron (NM_027944, intron 4 of 12)	155204	NM_001164235	71831	Mm.443238	NM_027944	ENSMUSG00000031620	1700007B14Rik	RIKEN cDNA 1700007B14 gene	protein-coding
chr8-2382	chr8	75367744	75369030	+	10.8	1286	Intergenic	Lx4B|LINE|L1	-80307	NM_027944	71831	Mm.443238	NM_027944	ENSMUSG00000031620	1700007B14Rik	RIKEN cDNA 1700007B14 gene	protein-coding
chr8-4925	chr8	75417827	75419145	+	9.52	1318	Intergenic	L1_Mus3|LINE|L1	-30208	NM_027944	71831	Mm.443238	NM_027944	ENSMUSG00000031620	1700007B14Rik	RIKEN cDNA 1700007B14 gene	protein-coding
chr8-3440	chr8	76048826	76049826	+	9.15	1000	Intergenic	(TC)n|Simple_repeat|Simple_repeat	600632	NM_001164235	71831	Mm.443238	NM_027944	ENSMUSG00000031620	1700007B14Rik	RIKEN cDNA 1700007B14 gene	protein-coding
chr8-2386	chr8	75926415	75927415	+	8.97	1000	intron (NM_027944, intron 12 of 12)	L1_Mus4|LINE|L1	478221	NM_001164235	71831	Mm.443238	NM_027944	ENSMUSG00000031620	1700007B14Rik	RIKEN cDNA 1700007B14 gene	protein-coding
chr8-8387	chr8	75966365	75967365	+	8.42	1000	intron (NM_027944, intron 12 of 12)	L1_Mus3|LINE|L1	518171	NM_001164235	71831	Mm.443238	NM_027944	ENSMUSG00000031620	1700007B14Rik	RIKEN cDNA 1700007B14 gene	protein-coding
chr8-5868	chr8	75865213	75866213	+	8.42	1000	intron (NM_027944, intron 11 of 12)	Lx2|LINE|L1	417019	NM_001164235	71831	Mm.443238	NM_027944	ENSMUSG00000031620	1700007B14Rik	RIKEN cDNA 1700007B14 gene	protein-coding
chr8-6978	chr8	75723521	75724521	+	8.24	1000	intron (NM_027944, intron 8 of 12)	MTA_Mm|LTR|ERVL-MaLR	275327	NM_001164235	71831	Mm.443238	NM_027944	ENSMUSG00000031620	1700007B14Rik	RIKEN cDNA 1700007B14 gene	protein-coding
chr8-8378	chr8	75513040	75514040	+	8.24	1000	intron (NM_001164235, intron 2 of 13)	RLTR25B|LTR|ERVK	64846	NM_001164235	71831	Mm.443238	NM_027944	ENSMUSG00000031620	1700007B14Rik	RIKEN cDNA 1700007B14 gene	protein-coding
chr8-5870	chr8	75882781	75883781	+	8.24	1000	intron (NM_027944, intron 11 of 12)	Lx9|LINE|L1	434587	NM_001164235	71831	Mm.443238	NM_027944	ENSMUSG00000031620	1700007B14Rik	RIKEN cDNA 1700007B14 gene	protein-coding
chr8-5863	chr8	75516948	75517948	+	8.24	1000	intron (NM_001164235, intron 2 of 13)	intron (NM_001164235, intron 2 of 13)	68754	NM_001164235	71831	Mm.443238	NM_027944	ENSMUSG00000031620	1700007B14Rik	RIKEN cDNA 1700007B14 gene	protein-coding
chr8-8374	chr8	75383650	75384650	+	8.24	1000	Intergenic	Intergenic	-64544	NM_027944	71831	Mm.443238	NM_027944	ENSMUSG00000031620	1700007B14Rik	RIKEN cDNA 1700007B14 gene	protein-coding
chr8-6974	chr8	75565998	75566998	+	7.87	1000	intron (NM_027944, intron 2 of 12)	L1_Mus3|LINE|L1	117804	NM_001164235	71831	Mm.443238	NM_027944	ENSMUSG00000031620	1700007B14Rik	RIKEN cDNA 1700007B14 gene	protein-coding
chr8-5869	chr8	75875013	75876013	+	7.87	1000	intron (NM_027944, intron 11 of 12)	intron (NM_027944, intron 11 of 12)	426819	NM_001164235	71831	Mm.443238	NM_027944	ENSMUSG00000031620	1700007B14Rik	RIKEN cDNA 1700007B14 gene	protein-coding
chr3-14454	chr3	58095358	58098673	+	25.6	3315	Intergenic	L1VL4|LINE|L1	66792	NR_040538	67850	Mm.416968	NR_040538		1700007F19Rik	RIKEN cDNA 1700007F19 gene	ncRNA
chr3-12189	chr3	58157087	58158354	+	9.88	1267	intron (NR_040538, intron 3 of 5)	Charlie17b|DNA|hAT-Charlie	6087	NR_040538	67850	Mm.416968	NR_040538		1700007F19Rik	RIKEN cDNA 1700007F19 gene	ncRNA
chr8-7454	chr8	129124333	129132648	+	67.9	8315	intron (NM_001168369, intron 5 of 14)	Lx2|LINE|L1	61356	NM_029292	75453	Mm.286964	NM_029292	ENSMUSG00000056018	1700008F21Rik	RIKEN cDNA 1700008F21 gene	protein-coding
chr8-5267	chr8	129111870	129117050	+	38.1	5180	intron (NM_001168369, intron 5 of 14)	L1Md_F2|LINE|L1	47326	NM_029292	75453	Mm.286964	NM_029292	ENSMUSG00000056018	1700008F21Rik	RIKEN cDNA 1700008F21 gene	protein-coding
chr8-2557	chr8	129106067	129108549	+	20.7	2482	intron (NM_029292, intron 2 of 10)	ORR1D1-int|LTR|ERVL-MaLR	40174	NM_029292	75453	Mm.286964	NM_029292	ENSMUSG00000056018	1700008F21Rik	RIKEN cDNA 1700008F21 gene	protein-coding
chr8-3681	chr8	129145653	129146914	+	11.5	1261	intron (NM_029292, intron 6 of 10)	L1_Mur3|LINE|L1	79149	NM_029292	75453	Mm.286964	NM_029292	ENSMUSG00000056018	1700008F21Rik	RIKEN cDNA 1700008F21 gene	protein-coding
chr8-3680	chr8	129137347	129138347	+	8.6	1000	intron (NM_029292, intron 4 of 10)	ORR1E-int|LTR|ERVL-MaLR	70713	NM_029292	75453	Mm.286964	NM_029292	ENSMUSG00000056018	1700008F21Rik	RIKEN cDNA 1700008F21 gene	protein-coding
chr8-7452	chr8	129087736	129088736	+	7.87	1000	intron (NM_029292, intron 2 of 10)	L1_Mus1|LINE|L1	21102	NM_029292	75453	Mm.286964	NM_029292	ENSMUSG00000056018	1700008F21Rik	RIKEN cDNA 1700008F21 gene	protein-coding
chr17-5435	chr17	49172821	49173821	+	8.6	1000	Intergenic	Intergenic	-59788	NR_038145	69311	Mm.46140	NR_038141		1700008K24Rik	RIKEN cDNA 1700008K24 gene	ncRNA
chr17-9689	chr17	49193440	49194440	+	7.87	1000	Intergenic	MLT1G1|LTR|ERVL-MaLR	-80407	NR_038145	69311	Mm.46140	NR_038141		1700008K24Rik	RIKEN cDNA 1700008K24 gene	ncRNA
chr7-9128	chr7	44362022	44363632	+	12.8	1610	intron (NM_027049, intron 3 of 5)	G-rich|Low_complexity|Low_complexity	12203	NM_027049	69349	Mm.358922	NM_027049	ENSMUSG00000008028	1700008O03Rik	RIKEN cDNA 1700008O03 gene	protein-coding
chr3-13540	chr3	6831658	6843858	+	91.5	12200	Intergenic	Intergenic	-217315	NM_027048	69347	Mm.45822	NM_027048	ENSMUSG00000069118	1700008P02Rik	RIKEN cDNA 1700008P02 gene	protein-coding
chr3-13519	chr3	6269031	6274827	+	46.5	5796	Intergenic	Lx|LINE|L1	348514	NM_027048	69347	Mm.45822	NM_027048	ENSMUSG00000069118	1700008P02Rik	RIKEN cDNA 1700008P02 gene	protein-coding
chr3-9491	chr3	6627283	6631016	+	34.8	3733	Intergenic	L1MCa|LINE|L1	-8706	NM_027048	69347	Mm.45822	NM_027048	ENSMUSG00000069118	1700008P02Rik	RIKEN cDNA 1700008P02 gene	protein-coding
chr3-11342	chr3	6291900	6295676	+	31.5	3776	Intergenic	L1_Mur1|LINE|L1	326655	NM_027048	69347	Mm.45822	NM_027048	ENSMUSG00000069118	1700008P02Rik	RIKEN cDNA 1700008P02 gene	protein-coding
chr3-9478	chr3	6360113	6363180	+	24.7	3067	Intergenic	Intergenic	258797	NM_027048	69347	Mm.45822	NM_027048	ENSMUSG00000069118	1700008P02Rik	RIKEN cDNA 1700008P02 gene	protein-coding
chr3-9493	chr3	6669314	6672602	+	22.7	3288	Intergenic	URR1A|DNA|hAT-Charlie	-50515	NM_027048	69347	Mm.45822	NM_027048	ENSMUSG00000069118	1700008P02Rik	RIKEN cDNA 1700008P02 gene	protein-coding
chr3-8024	chr3	6189786	6192605	+	21.6	2819	Intergenic	L1_Mus1|LINE|L1	429248	NM_027048	69347	Mm.45822	NM_027048	ENSMUSG00000069118	1700008P02Rik	RIKEN cDNA 1700008P02 gene	protein-coding
chr3-5584	chr3	6552061	6554662	+	20.9	2601	Intergenic	Intergenic	67082	NM_027048	69347	Mm.45822	NM_027048	ENSMUSG00000069118	1700008P02Rik	RIKEN cDNA 1700008P02 gene	protein-coding
chr3-13538	chr3	6824873	6827747	+	20.9	2874	Intergenic	Intergenic	-205867	NM_027048	69347	Mm.45822	NM_027048	ENSMUSG00000069118	1700008P02Rik	RIKEN cDNA 1700008P02 gene	protein-coding
chr3-13534	chr3	6747671	6750269	+	20	2598	Intergenic	Lx2B|LINE|L1	-128527	NM_027048	69347	Mm.45822	NM_027048	ENSMUSG00000069118	1700008P02Rik	RIKEN cDNA 1700008P02 gene	protein-coding
chr3-4682	chr3	6650577	6653258	+	19.4	2681	Intergenic	L1Md_F3|LINE|L1	-31474	NM_027048	69347	Mm.45822	NM_027048	ENSMUSG00000069118	1700008P02Rik	RIKEN cDNA 1700008P02 gene	protein-coding
chr3-8035	chr3	6693785	6695798	+	18.5	2013	Intergenic	Lx8b|LINE|L1	-74348	NM_027048	69347	Mm.45822	NM_027048	ENSMUSG00000069118	1700008P02Rik	RIKEN cDNA 1700008P02 gene	protein-coding
chr3-5583	chr3	6494430	6496700	+	17.9	2270	Intergenic	Lx6|LINE|L1	124878	NM_027048	69347	Mm.45822	NM_027048	ENSMUSG00000069118	1700008P02Rik	RIKEN cDNA 1700008P02 gene	protein-coding
chr3-13524	chr3	6430510	6432602	+	17	2092	Intergenic	Lx8|LINE|L1	188887	NM_027048	69347	Mm.45822	NM_027048	ENSMUSG00000069118	1700008P02Rik	RIKEN cDNA 1700008P02 gene	protein-coding
chr3-13533	chr3	6703513	6705535	+	16.3	2022	Intergenic	Lx2B2|LINE|L1	-84081	NM_027048	69347	Mm.45822	NM_027048	ENSMUSG00000069118	1700008P02Rik	RIKEN cDNA 1700008P02 gene	protein-coding
chr3-11350	chr3	6558393	6560346	+	16.3	1953	Intergenic	Lx9|LINE|L1	61074	NM_027048	69347	Mm.45822	NM_027048	ENSMUSG00000069118	1700008P02Rik	RIKEN cDNA 1700008P02 gene	protein-coding
chr3-9484	chr3	6449746	6451570	+	16.1	1824	Intergenic	Intergenic	169785	NM_027048	69347	Mm.45822	NM_027048	ENSMUSG00000069118	1700008P02Rik	RIKEN cDNA 1700008P02 gene	protein-coding
chr3-5577	chr3	6260764	6262571	+	15.7	1807	Intergenic	L1_Mus4|LINE|L1	358776	NM_027048	69347	Mm.45822	NM_027048	ENSMUSG00000069118	1700008P02Rik	RIKEN cDNA 1700008P02 gene	protein-coding
chr3-13523	chr3	6377635	6379351	+	14.1	1716	Intergenic	Intergenic	241950	NM_027048	69347	Mm.45822	NM_027048	ENSMUSG00000069118	1700008P02Rik	RIKEN cDNA 1700008P02 gene	protein-coding
chr3-6718	chr3	6286976	6288585	+	13.2	1609	Intergenic	Intergenic	332663	NM_027048	69347	Mm.45822	NM_027048	ENSMUSG00000069118	1700008P02Rik	RIKEN cDNA 1700008P02 gene	protein-coding
chr3-6723	chr3	6562529	6563946	+	12.4	1417	Intergenic	L1_Mus3|LINE|L1	57206	NM_027048	69347	Mm.45822	NM_027048	ENSMUSG00000069118	1700008P02Rik	RIKEN cDNA 1700008P02 gene	protein-coding
chr3-11360	chr3	6874869	6876381	+	12.3	1512	Intergenic	Intergenic	-255182	NM_027048	69347	Mm.45822	NM_027048	ENSMUSG00000069118	1700008P02Rik	RIKEN cDNA 1700008P02 gene	protein-coding
chr3-9469	chr3	6137777	6139144	+	11.7	1367	Intergenic	IAPLTR2b|LTR|ERVK	481983	NM_027048	69347	Mm.45822	NM_027048	ENSMUSG00000069118	1700008P02Rik	RIKEN cDNA 1700008P02 gene	protein-coding
chr3-9490	chr3	6619329	6620731	+	11.5	1402	exon (NM_027048, exon 1 of 4)	exon (NM_027048, exon 1 of 4)	413	NM_027048	69347	Mm.45822	NM_027048	ENSMUSG00000069118	1700008P02Rik	RIKEN cDNA 1700008P02 gene	protein-coding
chr3-9496	chr3	6797054	6798323	+	11.3	1269	Intergenic	Intergenic	-177245	NM_027048	69347	Mm.45822	NM_027048	ENSMUSG00000069118	1700008P02Rik	RIKEN cDNA 1700008P02 gene	protein-coding
chr3-8032	chr3	6609476	6610828	+	10.8	1352	Intergenic	Lx8|LINE|L1	10291	NM_027048	69347	Mm.45822	NM_027048	ENSMUSG00000069118	1700008P02Rik	RIKEN cDNA 1700008P02 gene	protein-coding
chr3-11352	chr3	6684935	6686315	+	10.6	1380	Intergenic	Intergenic	-65182	NM_027048	69347	Mm.45822	NM_027048	ENSMUSG00000069118	1700008P02Rik	RIKEN cDNA 1700008P02 gene	protein-coding
chr3-9470	chr3	6151014	6152405	+	10.4	1391	Intergenic	L1_Mur1|LINE|L1	468734	NM_027048	69347	Mm.45822	NM_027048	ENSMUSG00000069118	1700008P02Rik	RIKEN cDNA 1700008P02 gene	protein-coding
chr3-13536	chr3	6786292	6787680	+	10.3	1388	Intergenic	Lx|LINE|L1	-166543	NM_027048	69347	Mm.45822	NM_027048	ENSMUSG00000069118	1700008P02Rik	RIKEN cDNA 1700008P02 gene	protein-coding
chr3-11354	chr3	6734498	6735830	+	10.1	1332	Intergenic	Intergenic	-114721	NM_027048	69347	Mm.45822	NM_027048	ENSMUSG00000069118	1700008P02Rik	RIKEN cDNA 1700008P02 gene	protein-coding
chr3-11346	chr3	6445382	6446664	+	10.1	1282	Intergenic	Intergenic	174420	NM_027048	69347	Mm.45822	NM_027048	ENSMUSG00000069118	1700008P02Rik	RIKEN cDNA 1700008P02 gene	protein-coding
chr3-9482	chr3	6402868	6404135	+	9.52	1267	Intergenic	MERV1_I-int|LTR|ERV1	216942	NM_027048	69347	Mm.45822	NM_027048	ENSMUSG00000069118	1700008P02Rik	RIKEN cDNA 1700008P02 gene	protein-coding
chr3-9473	chr3	6243375	6244661	+	9.33	1286	Intergenic	L1VL4|LINE|L1	376425	NM_027048	69347	Mm.45822	NM_027048	ENSMUSG00000069118	1700008P02Rik	RIKEN cDNA 1700008P02 gene	protein-coding
chr3-5586	chr3	6820699	6821699	+	9.15	1000	Intergenic	Intergenic	-200756	NM_027048	69347	Mm.45822	NM_027048	ENSMUSG00000069118	1700008P02Rik	RIKEN cDNA 1700008P02 gene	protein-coding
chr3-5582	chr3	6490832	6491832	+	9.15	1000	Intergenic	L1_Mus3|LINE|L1	129111	NM_027048	69347	Mm.45822	NM_027048	ENSMUSG00000069118	1700008P02Rik	RIKEN cDNA 1700008P02 gene	protein-coding
chr3-4680	chr3	6279702	6280702	+	9.15	1000	Intergenic	Lx2B2|LINE|L1	340241	NM_027048	69347	Mm.45822	NM_027048	ENSMUSG00000069118	1700008P02Rik	RIKEN cDNA 1700008P02 gene	protein-coding
chr3-5587	chr3	6861381	6862381	+	8.97	1000	Intergenic	Intergenic	-241438	NM_027048	69347	Mm.45822	NM_027048	ENSMUSG00000069118	1700008P02Rik	RIKEN cDNA 1700008P02 gene	protein-coding
chr3-8034	chr3	6655076	6656076	+	8.79	1000	Intergenic	L1Md_F2|LINE|L1	-35133	NM_027048	69347	Mm.45822	NM_027048	ENSMUSG00000069118	1700008P02Rik	RIKEN cDNA 1700008P02 gene	protein-coding
chr3-6724	chr3	6566100	6567100	+	8.79	1000	Intergenic	Lx9|LINE|L1	53843	NM_027048	69347	Mm.45822	NM_027048	ENSMUSG00000069118	1700008P02Rik	RIKEN cDNA 1700008P02 gene	protein-coding
chr3-8037	chr3	6803734	6804734	+	8.6	1000	Intergenic	Lx2|LINE|L1	-183791	NM_027048	69347	Mm.45822	NM_027048	ENSMUSG00000069118	1700008P02Rik	RIKEN cDNA 1700008P02 gene	protein-coding
chr3-11348	chr3	6505029	6506029	+	8.6	1000	Intergenic	Intergenic	114914	NM_027048	69347	Mm.45822	NM_027048	ENSMUSG00000069118	1700008P02Rik	RIKEN cDNA 1700008P02 gene	protein-coding
chr3-9483	chr3	6413873	6414873	+	8.6	1000	Intergenic	L1_Mus3|LINE|L1	206070	NM_027048	69347	Mm.45822	NM_027048	ENSMUSG00000069118	1700008P02Rik	RIKEN cDNA 1700008P02 gene	protein-coding
chr3-9488	chr3	6534816	6535816	+	8.42	1000	Intergenic	L1_Mur3|LINE|L1	85127	NM_027048	69347	Mm.45822	NM_027048	ENSMUSG00000069118	1700008P02Rik	RIKEN cDNA 1700008P02 gene	protein-coding
chr3-9486	chr3	6483627	6484627	+	8.42	1000	Intergenic	MLTR31F_MM|LTR|ERVK	136316	NM_027048	69347	Mm.45822	NM_027048	ENSMUSG00000069118	1700008P02Rik	RIKEN cDNA 1700008P02 gene	protein-coding
chr3-11351	chr3	6575193	6576193	+	8.42	1000	Intergenic	L1_Mus4|LINE|L1	44750	NM_027048	69347	Mm.45822	NM_027048	ENSMUSG00000069118	1700008P02Rik	RIKEN cDNA 1700008P02 gene	protein-coding
chr3-9477	chr3	6332117	6333117	+	8.42	1000	Intergenic	Intergenic	287826	NM_027048	69347	Mm.45822	NM_027048	ENSMUSG00000069118	1700008P02Rik	RIKEN cDNA 1700008P02 gene	protein-coding
chr3-11349	chr3	6513694	6514694	+	8.42	1000	Intergenic	L1_Mus4|LINE|L1	106249	NM_027048	69347	Mm.45822	NM_027048	ENSMUSG00000069118	1700008P02Rik	RIKEN cDNA 1700008P02 gene	protein-coding
chr3-9476	chr3	6315709	6316709	+	8.24	1000	Intergenic	B1_Mm|SINE|Alu	304234	NM_027048	69347	Mm.45822	NM_027048	ENSMUSG00000069118	1700008P02Rik	RIKEN cDNA 1700008P02 gene	protein-coding
chr3-13527	chr3	6568709	6569709	+	8.24	1000	Intergenic	MER125|DNA|DNA	51234	NM_027048	69347	Mm.45822	NM_027048	ENSMUSG00000069118	1700008P02Rik	RIKEN cDNA 1700008P02 gene	protein-coding
chr3-9489	chr3	6600556	6601556	+	8.05	1000	Intergenic	L1_Mus2|LINE|L1	19387	NM_027048	69347	Mm.45822	NM_027048	ENSMUSG00000069118	1700008P02Rik	RIKEN cDNA 1700008P02 gene	protein-coding
chr3-13528	chr3	6578788	6579788	+	8.05	1000	Intergenic	Intergenic	41155	NM_027048	69347	Mm.45822	NM_027048	ENSMUSG00000069118	1700008P02Rik	RIKEN cDNA 1700008P02 gene	protein-coding
chr3-11353	chr3	6708733	6709733	+	7.87	1000	Intergenic	Lx3B|LINE|L1	-88790	NM_027048	69347	Mm.45822	NM_027048	ENSMUSG00000069118	1700008P02Rik	RIKEN cDNA 1700008P02 gene	protein-coding
chr6-8976	chr6	81906982	81907982	+	7.87	1000	intron (NR_046040, intron 4 of 5)	intron (NR_046040, intron 4 of 5)	3318	NR_046040	74220	Mm.490521	NR_046040		1700009C05Rik	RIKEN cDNA 1700009C05 gene	ncRNA
chr4-7558	chr4	39056603	39064935	+	67.9	8332	Intergenic	Lx5c|LINE|L1	-389524	NM_001081095	75471	Mm.23522	NM_001081095	ENSMUSG00000028287	1700009N14Rik	RIKEN cDNA 1700009N14 gene	protein-coding
chr4-7557	chr4	39003724	39009985	+	46.7	6261	Intergenic	MTEb-int|LTR|ERVL-MaLR	-443439	NM_001081095	75471	Mm.23522	NM_001081095	ENSMUSG00000028287	1700009N14Rik	RIKEN cDNA 1700009N14 gene	protein-coding
chr4-3632	chr4	38801325	38806805	+	45.2	5480	Intergenic	L1_Mus2|LINE|L1	-646228	NM_001081095	75471	Mm.23522	NM_001081095	ENSMUSG00000028287	1700009N14Rik	RIKEN cDNA 1700009N14 gene	protein-coding
chr4-8748	chr4	38900161	38905561	+	43.7	5400	Intergenic	Intergenic	-547432	NM_001081095	75471	Mm.23522	NM_001081095	ENSMUSG00000028287	1700009N14Rik	RIKEN cDNA 1700009N14 gene	protein-coding
chr4-3643	chr4	39143632	39149017	+	43.2	5385	Intergenic	Intergenic	-303969	NM_001081095	75471	Mm.23522	NM_001081095	ENSMUSG00000028287	1700009N14Rik	RIKEN cDNA 1700009N14 gene	protein-coding
chr4-11879	chr4	38557138	38562535	+	42.5	5397	Intergenic	MMERGLN-int|LTR|ERV1	-890457	NM_001081095	75471	Mm.23522	NM_001081095	ENSMUSG00000028287	1700009N14Rik	RIKEN cDNA 1700009N14 gene	protein-coding
chr4-3166	chr4	39223441	39228237	+	41	4796	Intergenic	Intergenic	-224454	NM_001081095	75471	Mm.23522	NM_001081095	ENSMUSG00000028287	1700009N14Rik	RIKEN cDNA 1700009N14 gene	protein-coding
chr4-11900	chr4	39034659	39039809	+	40.5	5150	Intergenic	MLTR18C_MM|LTR|ERVK	-413059	NM_001081095	75471	Mm.23522	NM_001081095	ENSMUSG00000028287	1700009N14Rik	RIKEN cDNA 1700009N14 gene	protein-coding
chr4-11905	chr4	39095926	39100006	+	34.2	4080	Intergenic	L1VL4|LINE|L1	-352327	NM_001081095	75471	Mm.23522	NM_001081095	ENSMUSG00000028287	1700009N14Rik	RIKEN cDNA 1700009N14 gene	protein-coding
chr4-7564	chr4	39392841	39397075	+	32.2	4234	Intergenic	LTRIS2|LTR|ERV1	-55335	NM_001081095	75471	Mm.23522	NM_001081095	ENSMUSG00000028287	1700009N14Rik	RIKEN cDNA 1700009N14 gene	protein-coding
chr4-816	chr4	38864109	38867624	+	30.2	3515	Intergenic	RMER6A|LTR|ERVK	-584427	NM_001081095	75471	Mm.23522	NM_001081095	ENSMUSG00000028287	1700009N14Rik	RIKEN cDNA 1700009N14 gene	protein-coding
chr4-8737	chr4	38545337	38548710	+	28.9	3373	Intergenic	RLTR1A2_MM|LTR|ERV1	-903270	NM_001081095	75471	Mm.23522	NM_001081095	ENSMUSG00000028287	1700009N14Rik	RIKEN cDNA 1700009N14 gene	protein-coding
chr4-11887	chr4	38814908	38818248	+	26.7	3340	Intergenic	Intergenic	-633715	NM_001081095	75471	Mm.23522	NM_001081095	ENSMUSG00000028287	1700009N14Rik	RIKEN cDNA 1700009N14 gene	protein-coding
chr4-5629	chr4	38501871	38505077	+	26.2	3206	Intergenic	Intergenic	-946819	NM_001081095	75471	Mm.23522	NM_001081095	ENSMUSG00000028287	1700009N14Rik	RIKEN cDNA 1700009N14 gene	protein-coding
chr4-8734	chr4	38410474	38413744	+	26	3270	Intergenic	Lx5b|LINE|L1	-1038184	NM_001081095	75471	Mm.23522	NM_001081095	ENSMUSG00000028287	1700009N14Rik	RIKEN cDNA 1700009N14 gene	protein-coding
chr4-5634	chr4	38592861	38595934	+	24.5	3073	Intergenic	Intergenic	-855896	NM_001081095	75471	Mm.23522	NM_001081095	ENSMUSG00000028287	1700009N14Rik	RIKEN cDNA 1700009N14 gene	protein-coding
chr4-10195	chr4	38821827	38824918	+	24.2	3091	Intergenic	Intergenic	-626921	NM_001081095	75471	Mm.23522	NM_001081095	ENSMUSG00000028287	1700009N14Rik	RIKEN cDNA 1700009N14 gene	protein-coding
chr4-10183	chr4	38324077	38327225	+	23.4	3148	Intergenic	Lx6|LINE|L1	-1124642	NM_001081095	75471	Mm.23522	NM_001081095	ENSMUSG00000028287	1700009N14Rik	RIKEN cDNA 1700009N14 gene	protein-coding
chr4-5639	chr4	38833953	38837011	+	22.7	3058	Intergenic	B1_Mus1|SINE|Alu	-614811	NM_001081095	75471	Mm.23522	NM_001081095	ENSMUSG00000028287	1700009N14Rik	RIKEN cDNA 1700009N14 gene	protein-coding
chr4-6514	chr4	38970675	38973291	+	22.3	2616	Intergenic	LTRIS2|LTR|ERV1	-478310	NM_001081095	75471	Mm.23522	NM_001081095	ENSMUSG00000028287	1700009N14Rik	RIKEN cDNA 1700009N14 gene	protein-coding
chr4-5645	chr4	39072242	39075103	+	22.1	2861	Intergenic	Lx2B|LINE|L1	-376621	NM_001081095	75471	Mm.23522	NM_001081095	ENSMUSG00000028287	1700009N14Rik	RIKEN cDNA 1700009N14 gene	protein-coding
chr4-3637	chr4	38884317	38886835	+	21.6	2518	Intergenic	Lx5|LINE|L1	-564717	NM_001081095	75471	Mm.23522	NM_001081095	ENSMUSG00000028287	1700009N14Rik	RIKEN cDNA 1700009N14 gene	protein-coding
chr4-5640	chr4	38890112	38892998	+	21.4	2886	Intergenic	MLT1F1|LTR|ERVL-MaLR	-558738	NM_001081095	75471	Mm.23522	NM_001081095	ENSMUSG00000028287	1700009N14Rik	RIKEN cDNA 1700009N14 gene	protein-coding
chr4-3635	chr4	38839668	38842618	+	20.1	2950	Intergenic	L1Md_F3|LINE|L1	-609150	NM_001081095	75471	Mm.23522	NM_001081095	ENSMUSG00000028287	1700009N14Rik	RIKEN cDNA 1700009N14 gene	protein-coding
chr4-10203	chr4	38987288	38989695	+	17.9	2407	Intergenic	Intergenic	-461802	NM_001081095	75471	Mm.23522	NM_001081095	ENSMUSG00000028287	1700009N14Rik	RIKEN cDNA 1700009N14 gene	protein-coding
chr4-10200	chr4	38941163	38943364	+	17	2201	Intergenic	Intergenic	-508030	NM_001081095	75471	Mm.23522	NM_001081095	ENSMUSG00000028287	1700009N14Rik	RIKEN cDNA 1700009N14 gene	protein-coding
chr4-3633	chr4	38826806	38828638	+	16.8	1832	Intergenic	Intergenic	-622571	NM_001081095	75471	Mm.23522	NM_001081095	ENSMUSG00000028287	1700009N14Rik	RIKEN cDNA 1700009N14 gene	protein-coding
chr4-10191	chr4	38648701	38650506	+	16.7	1805	Intergenic	B4A|SINE|B4	-800690	NM_001081095	75471	Mm.23522	NM_001081095	ENSMUSG00000028287	1700009N14Rik	RIKEN cDNA 1700009N14 gene	protein-coding
chr4-7552	chr4	38811092	38813009	+	16.3	1917	Intergenic	Intergenic	-638243	NM_001081095	75471	Mm.23522	NM_001081095	ENSMUSG00000028287	1700009N14Rik	RIKEN cDNA 1700009N14 gene	protein-coding
chr4-4892	chr4	39464777	39466660	+	16.1	1883	Intergenic	Intergenic	15425	NM_001081095	75471	Mm.23522	NM_001081095	ENSMUSG00000028287	1700009N14Rik	RIKEN cDNA 1700009N14 gene	protein-coding
chr4-10197	chr4	38879915	38881818	+	14.6	1903	Intergenic	RodERV21-int|LTR|ERV1	-569427	NM_001081095	75471	Mm.23522	NM_001081095	ENSMUSG00000028287	1700009N14Rik	RIKEN cDNA 1700009N14 gene	protein-coding
chr4-4893	chr4	39770219	39771769	+	14.6	1550	Intergenic	Lx9|LINE|L1	320701	NM_001081095	75471	Mm.23522	NM_001081095	ENSMUSG00000028287	1700009N14Rik	RIKEN cDNA 1700009N14 gene	protein-coding
chr4-11903	chr4	39076946	39078587	+	13.5	1641	Intergenic	Intergenic	-372527	NM_001081095	75471	Mm.23522	NM_001081095	ENSMUSG00000028287	1700009N14Rik	RIKEN cDNA 1700009N14 gene	protein-coding
chr4-3636	chr4	38850181	38851757	+	13.2	1576	Intergenic	Intergenic	-599324	NM_001081095	75471	Mm.23522	NM_001081095	ENSMUSG00000028287	1700009N14Rik	RIKEN cDNA 1700009N14 gene	protein-coding
chr4-3639	chr4	38929300	38930588	+	11.9	1288	Intergenic	Intergenic	-520349	NM_001081095	75471	Mm.23522	NM_001081095	ENSMUSG00000028287	1700009N14Rik	RIKEN cDNA 1700009N14 gene	protein-coding
chr4-11897	chr4	38974844	38976355	+	11.7	1511	Intergenic	Intergenic	-474694	NM_001081095	75471	Mm.23522	NM_001081095	ENSMUSG00000028287	1700009N14Rik	RIKEN cDNA 1700009N14 gene	protein-coding
chr4-6508	chr4	38700120	38701378	+	11.5	1258	Intergenic	Lx2A1|LINE|L1	-749544	NM_001081095	75471	Mm.23522	NM_001081095	ENSMUSG00000028287	1700009N14Rik	RIKEN cDNA 1700009N14 gene	protein-coding
chr4-5636	chr4	38620733	38622049	+	11.3	1316	Intergenic	L1Md_F2|LINE|L1	-828902	NM_001081095	75471	Mm.23522	NM_001081095	ENSMUSG00000028287	1700009N14Rik	RIKEN cDNA 1700009N14 gene	protein-coding
chr4-7543	chr4	38387580	38388978	+	11.2	1398	Intergenic	Intergenic	-1062014	NM_001081095	75471	Mm.23522	NM_001081095	ENSMUSG00000028287	1700009N14Rik	RIKEN cDNA 1700009N14 gene	protein-coding
chr4-7563	chr4	39138732	39140003	+	11.2	1271	Intergenic	Lx|LINE|L1	-310926	NM_001081095	75471	Mm.23522	NM_001081095	ENSMUSG00000028287	1700009N14Rik	RIKEN cDNA 1700009N14 gene	protein-coding
chr4-11883	chr4	38693234	38694532	+	11	1298	Intergenic	Intergenic	-756410	NM_001081095	75471	Mm.23522	NM_001081095	ENSMUSG00000028287	1700009N14Rik	RIKEN cDNA 1700009N14 gene	protein-coding
chr4-3630	chr4	38645041	38646316	+	11	1275	Intergenic	ORR1B2|LTR|ERVL-MaLR	-804615	NM_001081095	75471	Mm.23522	NM_001081095	ENSMUSG00000028287	1700009N14Rik	RIKEN cDNA 1700009N14 gene	protein-coding
chr4-5644	chr4	39068257	39069554	+	10.8	1297	Intergenic	Lx9|LINE|L1	-381388	NM_001081095	75471	Mm.23522	NM_001081095	ENSMUSG00000028287	1700009N14Rik	RIKEN cDNA 1700009N14 gene	protein-coding
chr4-4882	chr4	38528383	38529648	+	10.8	1265	Intergenic	Lx7|LINE|L1	-921278	NM_001081095	75471	Mm.23522	NM_001081095	ENSMUSG00000028287	1700009N14Rik	RIKEN cDNA 1700009N14 gene	protein-coding
chr4-11871	chr4	38302915	38304269	+	10.8	1354	Intergenic	Intergenic	-1146701	NM_001081095	75471	Mm.23522	NM_001081095	ENSMUSG00000028287	1700009N14Rik	RIKEN cDNA 1700009N14 gene	protein-coding
chr4-6515	chr4	38992793	38994165	+	10.6	1372	Intergenic	Intergenic	-456814	NM_001081095	75471	Mm.23522	NM_001081095	ENSMUSG00000028287	1700009N14Rik	RIKEN cDNA 1700009N14 gene	protein-coding
chr4-4881	chr4	38522835	38523835	+	9.15	1000	Intergenic	L1M4|LINE|L1	-926958	NM_001081095	75471	Mm.23522	NM_001081095	ENSMUSG00000028287	1700009N14Rik	RIKEN cDNA 1700009N14 gene	protein-coding
chr4-3646	chr4	39513612	39514612	+	8.97	1000	Intergenic	Intergenic	63819	NM_001081095	75471	Mm.23522	NM_001081095	ENSMUSG00000028287	1700009N14Rik	RIKEN cDNA 1700009N14 gene	protein-coding
chr4-7565	chr4	39676539	39677539	+	8.79	1000	Intergenic	Intergenic	226746	NM_001081095	75471	Mm.23522	NM_001081095	ENSMUSG00000028287	1700009N14Rik	RIKEN cDNA 1700009N14 gene	protein-coding
chr4-7546	chr4	38515124	38516124	+	8.79	1000	Intergenic	Lx7|LINE|L1	-934669	NM_001081095	75471	Mm.23522	NM_001081095	ENSMUSG00000028287	1700009N14Rik	RIKEN cDNA 1700009N14 gene	protein-coding
chr4-6520	chr4	39018067	39019067	+	8.6	1000	Intergenic	Lx7|LINE|L1	-431726	NM_001081095	75471	Mm.23522	NM_001081095	ENSMUSG00000028287	1700009N14Rik	RIKEN cDNA 1700009N14 gene	protein-coding
chr4-7547	chr4	38537907	38538907	+	8.6	1000	Intergenic	Intergenic	-911886	NM_001081095	75471	Mm.23522	NM_001081095	ENSMUSG00000028287	1700009N14Rik	RIKEN cDNA 1700009N14 gene	protein-coding
chr4-8743	chr4	38830960	38831960	+	8.6	1000	Intergenic	Intergenic	-618833	NM_001081095	75471	Mm.23522	NM_001081095	ENSMUSG00000028287	1700009N14Rik	RIKEN cDNA 1700009N14 gene	protein-coding
chr4-8731	chr4	38236362	38237362	+	8.6	1000	Intergenic	L1_Mus2|LINE|L1	-1213431	NM_001081095	75471	Mm.23522	NM_001081095	ENSMUSG00000028287	1700009N14Rik	RIKEN cDNA 1700009N14 gene	protein-coding
chr4-8740	chr4	38705652	38706652	+	8.6	1000	Intergenic	L1_Mur3|LINE|L1	-744141	NM_001081095	75471	Mm.23522	NM_001081095	ENSMUSG00000028287	1700009N14Rik	RIKEN cDNA 1700009N14 gene	protein-coding
chr4-8735	chr4	38438293	38439293	+	8.42	1000	Intergenic	Intergenic	-1011500	NM_001081095	75471	Mm.23522	NM_001081095	ENSMUSG00000028287	1700009N14Rik	RIKEN cDNA 1700009N14 gene	protein-coding
chr4-7549	chr4	38589861	38590861	+	8.42	1000	Intergenic	L1Md_F3|LINE|L1	-859932	NM_001081095	75471	Mm.23522	NM_001081095	ENSMUSG00000028287	1700009N14Rik	RIKEN cDNA 1700009N14 gene	protein-coding
chr4-10192	chr4	38686712	38687712	+	8.42	1000	Intergenic	L1_Mus3|LINE|L1	-763081	NM_001081095	75471	Mm.23522	NM_001081095	ENSMUSG00000028287	1700009N14Rik	RIKEN cDNA 1700009N14 gene	protein-coding
chr4-7566	chr4	39795117	39796117	+	8.24	1000	Intergenic	Intergenic	345324	NM_001081095	75471	Mm.23522	NM_001081095	ENSMUSG00000028287	1700009N14Rik	RIKEN cDNA 1700009N14 gene	protein-coding
chr4-11874	chr4	38383967	38384967	+	8.24	1000	Intergenic	MMERGLN-int|LTR|ERV1	-1065826	NM_001081095	75471	Mm.23522	NM_001081095	ENSMUSG00000028287	1700009N14Rik	RIKEN cDNA 1700009N14 gene	protein-coding
chr4-10199	chr4	38897218	38898218	+	8.24	1000	Intergenic	L1_Mus3|LINE|L1	-552575	NM_001081095	75471	Mm.23522	NM_001081095	ENSMUSG00000028287	1700009N14Rik	RIKEN cDNA 1700009N14 gene	protein-coding
chr4-11911	chr4	39644662	39645662	+	8.24	1000	Intergenic	Intergenic	194869	NM_001081095	75471	Mm.23522	NM_001081095	ENSMUSG00000028287	1700009N14Rik	RIKEN cDNA 1700009N14 gene	protein-coding
chr4-11885	chr4	38795083	38796083	+	8.24	1000	Intergenic	Lx3A|LINE|L1	-654710	NM_001081095	75471	Mm.23522	NM_001081095	ENSMUSG00000028287	1700009N14Rik	RIKEN cDNA 1700009N14 gene	protein-coding
chr4-11904	chr4	39082929	39083929	+	8.24	1000	Intergenic	Intergenic	-366864	NM_001081095	75471	Mm.23522	NM_001081095	ENSMUSG00000028287	1700009N14Rik	RIKEN cDNA 1700009N14 gene	protein-coding
chr4-10210	chr4	39519289	39520289	+	8.05	1000	Intergenic	Intergenic	69496	NM_001081095	75471	Mm.23522	NM_001081095	ENSMUSG00000028287	1700009N14Rik	RIKEN cDNA 1700009N14 gene	protein-coding
chr4-10196	chr4	38844132	38845132	+	8.05	1000	Intergenic	L1Md_F3|LINE|L1	-605661	NM_001081095	75471	Mm.23522	NM_001081095	ENSMUSG00000028287	1700009N14Rik	RIKEN cDNA 1700009N14 gene	protein-coding
chr4-11909	chr4	39258534	39259534	+	8.05	1000	Intergenic	L1_Mur2|LINE|L1	-191259	NM_001081095	75471	Mm.23522	NM_001081095	ENSMUSG00000028287	1700009N14Rik	RIKEN cDNA 1700009N14 gene	protein-coding
chr4-11908	chr4	39155160	39156160	+	8.05	1000	Intergenic	MLTR11B|LTR|ERVK	-294633	NM_001081095	75471	Mm.23522	NM_001081095	ENSMUSG00000028287	1700009N14Rik	RIKEN cDNA 1700009N14 gene	protein-coding
chr4-11884	chr4	38732811	38733811	+	8.05	1000	Intergenic	Intergenic	-716982	NM_001081095	75471	Mm.23522	NM_001081095	ENSMUSG00000028287	1700009N14Rik	RIKEN cDNA 1700009N14 gene	protein-coding
chr4-11894	chr4	38948703	38949703	+	8.05	1000	Intergenic	Lx8b|LINE|L1	-501090	NM_001081095	75471	Mm.23522	NM_001081095	ENSMUSG00000028287	1700009N14Rik	RIKEN cDNA 1700009N14 gene	protein-coding
chr4-10185	chr4	38362511	38363511	+	7.87	1000	Intergenic	Lx9|LINE|L1	-1087282	NM_001081095	75471	Mm.23522	NM_001081095	ENSMUSG00000028287	1700009N14Rik	RIKEN cDNA 1700009N14 gene	protein-coding
chr4-11877	chr4	38468202	38469202	+	7.87	1000	Intergenic	Intergenic	-981591	NM_001081095	75471	Mm.23522	NM_001081095	ENSMUSG00000028287	1700009N14Rik	RIKEN cDNA 1700009N14 gene	protein-coding
chr4-10182	chr4	38209150	38210150	+	7.87	1000	Intergenic	Lx2|LINE|L1	-1240643	NM_001081095	75471	Mm.23522	NM_001081095	ENSMUSG00000028287	1700009N14Rik	RIKEN cDNA 1700009N14 gene	protein-coding
chr4-11882	chr4	38633213	38634213	+	7.87	1000	Intergenic	Intergenic	-816580	NM_001081095	75471	Mm.23522	NM_001081095	ENSMUSG00000028287	1700009N14Rik	RIKEN cDNA 1700009N14 gene	protein-coding
chr4-11881	chr4	38567187	38568187	+	7.87	1000	Intergenic	Intergenic	-882606	NM_001081095	75471	Mm.23522	NM_001081095	ENSMUSG00000028287	1700009N14Rik	RIKEN cDNA 1700009N14 gene	protein-coding
chr4-11895	chr4	38952790	38953790	+	7.87	1000	Intergenic	Intergenic	-497003	NM_001081095	75471	Mm.23522	NM_001081095	ENSMUSG00000028287	1700009N14Rik	RIKEN cDNA 1700009N14 gene	protein-coding
chr4-8750	chr4	38922583	38923583	+	7.69	1000	Intergenic	L1MB2|LINE|L1	-527210	NM_001081095	75471	Mm.23522	NM_001081095	ENSMUSG00000028287	1700009N14Rik	RIKEN cDNA 1700009N14 gene	protein-coding
chr4-11876	chr4	38441528	38442528	+	7.32	1000	Intergenic	Intergenic	-1008265	NM_001081095	75471	Mm.23522	NM_001081095	ENSMUSG00000028287	1700009N14Rik	RIKEN cDNA 1700009N14 gene	protein-coding
chr3-5603	chr3	8175641	8178981	+	28.4	3340	Intergenic	Intergenic	-222424	NR_040587	75476	Mm.491752	NR_040587		1700010I02Rik	RIKEN cDNA 1700010I02 gene	ncRNA
chr3-11392	chr3	7864333	7866450	+	16.8	2117	Intergenic	Intergenic	89496	NR_040587	75476	Mm.491752	NR_040587		1700010I02Rik	RIKEN cDNA 1700010I02 gene	ncRNA
chr3-11394	chr3	8169741	8171663	+	15.4	1922	Intergenic	RodERV21-int|LTR|ERV1	-215815	NR_040587	75476	Mm.491752	NR_040587		1700010I02Rik	RIKEN cDNA 1700010I02 gene	ncRNA
chr3-2741	chr3	7816823	7818422	+	14.8	1599	Intergenic	Lx5c|LINE|L1	137265	NR_040587	75476	Mm.491752	NR_040587		1700010I02Rik	RIKEN cDNA 1700010I02 gene	ncRNA
chr3-8052	chr3	8101704	8103530	+	14.8	1826	Intergenic	Lx5|LINE|L1	-147730	NR_040587	75476	Mm.491752	NR_040587		1700010I02Rik	RIKEN cDNA 1700010I02 gene	ncRNA
chr3-4691	chr3	7839214	7840728	+	13	1514	Intergenic	L1Md_F|LINE|L1	114916	NR_040587	75476	Mm.491752	NR_040587		1700010I02Rik	RIKEN cDNA 1700010I02 gene	ncRNA
chr3-4692	chr3	8183725	8184725	+	8.97	1000	Intergenic	L1_Mus3|LINE|L1	-229338	NR_040587	75476	Mm.491752	NR_040587		1700010I02Rik	RIKEN cDNA 1700010I02 gene	ncRNA
chr17-5005	chr17	8942517	8943778	+	10.1	1261	intron (NM_011866, intron 7 of 21)	intron (NM_011866, intron 7 of 21)	-45186	NM_025851	66931	Mm.67591	NM_025851	ENSMUSG00000023873	1700010I14Rik	RIKEN cDNA 1700010I14 gene	protein-coding
chr17-3730	chr17	8916685	8917685	+	8.97	1000	intron (NM_011866, intron 2 of 21)	MTA_Mm|LTR|ERVL-MaLR	-71148	NM_025851	66931	Mm.67591	NM_025851	ENSMUSG00000023873	1700010I14Rik	RIKEN cDNA 1700010I14 gene	protein-coding
chr17-6705	chr17	8982538	8983538	+	8.24	1000	3' UTR (NM_001290707, exon 23 of 23)	3' UTR (NM_001290707, exon 23 of 23)	-5295	NM_025851	66931	Mm.67591	NM_025851	ENSMUSG00000023873	1700010I14Rik	RIKEN cDNA 1700010I14 gene	protein-coding
chr10-8711	chr10	112691894	112698238	+	43.4	6344	Intergenic	Intergenic	-31860	NR_040579	69355	Mm.84337	NR_040579		1700010J16Rik	RIKEN cDNA 1700010J16 gene	ncRNA
chr10-5266	chr10	112625309	112630226	+	42.1	4917	Intergenic	Intergenic	-99159	NR_040579	69355	Mm.84337	NR_040579		1700010J16Rik	RIKEN cDNA 1700010J16 gene	ncRNA
chr10-7351	chr10	112593691	112598266	+	34.4	4575	Intergenic	RLTR1C|LTR|ERV1	-130948	NR_040579	69355	Mm.84337	NR_040579		1700010J16Rik	RIKEN cDNA 1700010J16 gene	ncRNA
chr10-4441	chr10	112518645	112520595	+	17.4	1950	Intergenic	Intergenic	-207306	NR_040579	69355	Mm.84337	NR_040579		1700010J16Rik	RIKEN cDNA 1700010J16 gene	ncRNA
chr10-6201	chr10	112672356	112674453	+	17	2097	Intergenic	Lx8b|LINE|L1	-53522	NR_040579	69355	Mm.84337	NR_040579		1700010J16Rik	RIKEN cDNA 1700010J16 gene	ncRNA
chr10-10281	chr10	112580737	112582555	+	15.2	1818	Intergenic	Intergenic	-145280	NR_040579	69355	Mm.84337	NR_040579		1700010J16Rik	RIKEN cDNA 1700010J16 gene	ncRNA
chr10-10288	chr10	112820916	112822340	+	12.3	1424	Intergenic	C-rich|Low_complexity|Low_complexity	94702	NR_040579	69355	Mm.84337	NR_040579		1700010J16Rik	RIKEN cDNA 1700010J16 gene	ncRNA
chr10-6208	chr10	112778557	112780121	+	12.1	1564	intron (NR_040579, intron 5 of 6)	intron (NR_040579, intron 5 of 6)	52413	NR_040579	69355	Mm.84337	NR_040579		1700010J16Rik	RIKEN cDNA 1700010J16 gene	ncRNA
chr10-6200	chr10	112639667	112641029	+	11.3	1362	Intergenic	L1_Mus1|LINE|L1	-86578	NR_040579	69355	Mm.84337	NR_040579		1700010J16Rik	RIKEN cDNA 1700010J16 gene	ncRNA
chr10-8708	chr10	112606643	112608045	+	11.2	1402	Intergenic	Intergenic	-119582	NR_040579	69355	Mm.84337	NR_040579		1700010J16Rik	RIKEN cDNA 1700010J16 gene	ncRNA
chr10-10289	chr10	112827190	112828599	+	11.2	1409	Intergenic	RLTR11A|LTR|ERVK	100968	NR_040579	69355	Mm.84337	NR_040579		1700010J16Rik	RIKEN cDNA 1700010J16 gene	ncRNA
chr10-6204	chr10	112685527	112686784	+	11	1257	Intergenic	Intergenic	-40771	NR_040579	69355	Mm.84337	NR_040579		1700010J16Rik	RIKEN cDNA 1700010J16 gene	ncRNA
chr10-4447	chr10	112721954	112723226	+	11	1272	Intergenic	Lx6|LINE|L1	-4336	NR_040579	69355	Mm.84337	NR_040579		1700010J16Rik	RIKEN cDNA 1700010J16 gene	ncRNA
chr10-5267	chr10	112677735	112679005	+	10.1	1270	Intergenic	RLTR17D_Mm|LTR|ERVK	-48556	NR_040579	69355	Mm.84337	NR_040579		1700010J16Rik	RIKEN cDNA 1700010J16 gene	ncRNA
chr10-3741	chr10	112548634	112549634	+	8.97	1000	Intergenic	Intergenic	-177792	NR_040579	69355	Mm.84337	NR_040579		1700010J16Rik	RIKEN cDNA 1700010J16 gene	ncRNA
chr10-6198	chr10	112615281	112616281	+	8.6	1000	Intergenic	Lx2|LINE|L1	-111145	NR_040579	69355	Mm.84337	NR_040579		1700010J16Rik	RIKEN cDNA 1700010J16 gene	ncRNA
chr10-6206	chr10	112706123	112707123	+	8.42	1000	Intergenic	MusHAL1|LINE|L1	-20303	NR_040579	69355	Mm.84337	NR_040579		1700010J16Rik	RIKEN cDNA 1700010J16 gene	ncRNA
chr10-10285	chr10	112739657	112740657	+	8.05	1000	intron (NR_040579, intron 2 of 6)	intron (NR_040579, intron 2 of 6)	13231	NR_040579	69355	Mm.84337	NR_040579		1700010J16Rik	RIKEN cDNA 1700010J16 gene	ncRNA
chr10-8705	chr10	112584497	112585497	+	8.05	1000	Intergenic	Lx7|LINE|L1	-141929	NR_040579	69355	Mm.84337	NR_040579		1700010J16Rik	RIKEN cDNA 1700010J16 gene	ncRNA
chr10-8709	chr10	112648969	112649969	+	8.05	1000	Intergenic	Intergenic	-77457	NR_040579	69355	Mm.84337	NR_040579		1700010J16Rik	RIKEN cDNA 1700010J16 gene	ncRNA
chr10-8704	chr10	112566053	112567053	+	8.05	1000	Intergenic	Intergenic	-160373	NR_040579	69355	Mm.84337	NR_040579		1700010J16Rik	RIKEN cDNA 1700010J16 gene	ncRNA
chr10-10279	chr10	112526835	112527835	+	8.05	1000	Intergenic	Intergenic	-199591	NR_040579	69355	Mm.84337	NR_040579		1700010J16Rik	RIKEN cDNA 1700010J16 gene	ncRNA
chr10-10286	chr10	112765387	112766387	+	7.87	1000	intron (NR_040579, intron 5 of 6)	intron (NR_040579, intron 5 of 6)	38961	NR_040579	69355	Mm.84337	NR_040579		1700010J16Rik	RIKEN cDNA 1700010J16 gene	ncRNA
chr10-10280	chr10	112542193	112543193	+	7.87	1000	Intergenic	Intergenic	-184233	NR_040579	69355	Mm.84337	NR_040579		1700010J16Rik	RIKEN cDNA 1700010J16 gene	ncRNA
chr16-5886	chr16	66251481	66257412	+	48.3	5931	Intergenic	Lx5b|LINE|L1	-402672	NR_040512	75501	Mm.394300	NR_040512	ENSMUSG00000092599	1700010K23Rik	RIKEN cDNA 1700010K23 gene	ncRNA
chr16-3339	chr16	66287399	66293916	+	47	6517	Intergenic	Intergenic	-366461	NR_040512	75501	Mm.394300	NR_040512	ENSMUSG00000092599	1700010K23Rik	RIKEN cDNA 1700010K23 gene	ncRNA
chr16-5889	chr16	66457468	66463164	+	45	5696	Intergenic	Intergenic	-196802	NR_040512	75501	Mm.394300	NR_040512	ENSMUSG00000092599	1700010K23Rik	RIKEN cDNA 1700010K23 gene	ncRNA
chr16-4897	chr16	66472268	66476874	+	36.2	4606	Intergenic	IAPEY3-int|LTR|ERVK	-182547	NR_040512	75501	Mm.394300	NR_040512	ENSMUSG00000092599	1700010K23Rik	RIKEN cDNA 1700010K23 gene	ncRNA
chr16-4902	chr16	66942833	66946836	+	31.3	4003	intron (NM_001145977, intron 1 of 8)	intron (NM_001145977, intron 1 of 8)	287716	NR_040512	75501	Mm.394300	NR_040512	ENSMUSG00000092599	1700010K23Rik	RIKEN cDNA 1700010K23 gene	ncRNA
chr16-7103	chr16	66303424	66306813	+	26.7	3389	Intergenic	Intergenic	-352000	NR_040512	75501	Mm.394300	NR_040512	ENSMUSG00000092599	1700010K23Rik	RIKEN cDNA 1700010K23 gene	ncRNA
chr16-7110	chr16	66479117	66481618	+	19	2501	Intergenic	Intergenic	-176751	NR_040512	75501	Mm.394300	NR_040512	ENSMUSG00000092599	1700010K23Rik	RIKEN cDNA 1700010K23 gene	ncRNA
chr16-7105	chr16	66359923	66362242	+	17.4	2319	Intergenic	Intergenic	-296036	NR_040512	75501	Mm.394300	NR_040512	ENSMUSG00000092599	1700010K23Rik	RIKEN cDNA 1700010K23 gene	ncRNA
chr16-4900	chr16	66791019	66793063	+	17.2	2044	intron (NM_178721, intron 5 of 9)	intron (NM_178721, intron 5 of 9)	134923	NR_040512	75501	Mm.394300	NR_040512	ENSMUSG00000092599	1700010K23Rik	RIKEN cDNA 1700010K23 gene	ncRNA
chr16-7114	chr16	66560481	66562425	+	16.3	1944	Intergenic	B3|SINE|B2	-95665	NR_040512	75501	Mm.394300	NR_040512	ENSMUSG00000092599	1700010K23Rik	RIKEN cDNA 1700010K23 gene	ncRNA
chr16-5898	chr16	66950482	66952518	+	16.1	2036	intron (NM_001145977, intron 1 of 8)	Lx|LINE|L1	294382	NR_040512	75501	Mm.394300	NR_040512	ENSMUSG00000092599	1700010K23Rik	RIKEN cDNA 1700010K23 gene	ncRNA
chr16-7107	chr16	66368644	66370626	+	15.7	1982	Intergenic	Intergenic	-287483	NR_040512	75501	Mm.394300	NR_040512	ENSMUSG00000092599	1700010K23Rik	RIKEN cDNA 1700010K23 gene	ncRNA
chr16-4020	chr16	66261521	66263344	+	15.4	1823	Intergenic	Intergenic	-394686	NR_040512	75501	Mm.394300	NR_040512	ENSMUSG00000092599	1700010K23Rik	RIKEN cDNA 1700010K23 gene	ncRNA
chr16-1886	chr16	66281708	66283295	+	13.4	1587	Intergenic	Intergenic	-374617	NR_040512	75501	Mm.394300	NR_040512	ENSMUSG00000092599	1700010K23Rik	RIKEN cDNA 1700010K23 gene	ncRNA
chr16-1887	chr16	66309347	66311026	+	13	1679	Intergenic	Intergenic	-346932	NR_040512	75501	Mm.394300	NR_040512	ENSMUSG00000092599	1700010K23Rik	RIKEN cDNA 1700010K23 gene	ncRNA
chr16-5894	chr16	66901896	66903442	+	12.4	1546	intron (NM_001145977, intron 1 of 8)	intron (NM_001145977, intron 1 of 8)	245551	NR_040512	75501	Mm.394300	NR_040512	ENSMUSG00000092599	1700010K23Rik	RIKEN cDNA 1700010K23 gene	ncRNA
chr16-2285	chr16	66500318	66501828	+	12.3	1510	Intergenic	Intergenic	-156045	NR_040512	75501	Mm.394300	NR_040512	ENSMUSG00000092599	1700010K23Rik	RIKEN cDNA 1700010K23 gene	ncRNA
chr16-1553	chr16	66374912	66376451	+	11.9	1539	Intergenic	Intergenic	-281437	NR_040512	75501	Mm.394300	NR_040512	ENSMUSG00000092599	1700010K23Rik	RIKEN cDNA 1700010K23 gene	ncRNA
chr16-2280	chr16	66239174	66240487	+	11.5	1313	Intergenic	Lx9|LINE|L1	-417288	NR_040512	75501	Mm.394300	NR_040512	ENSMUSG00000092599	1700010K23Rik	RIKEN cDNA 1700010K23 gene	ncRNA
chr16-4030	chr16	66751643	66753090	+	11	1447	intron (NM_178721, intron 7 of 9)	intron (NM_178721, intron 7 of 9)	95248	NR_040512	75501	Mm.394300	NR_040512	ENSMUSG00000092599	1700010K23Rik	RIKEN cDNA 1700010K23 gene	ncRNA
chr16-4023	chr16	66326840	66328167	+	10.8	1327	Intergenic	Intergenic	-329615	NR_040512	75501	Mm.394300	NR_040512	ENSMUSG00000092599	1700010K23Rik	RIKEN cDNA 1700010K23 gene	ncRNA
chr16-4028	chr16	66504046	66505340	+	10.4	1294	Intergenic	Intergenic	-152425	NR_040512	75501	Mm.394300	NR_040512	ENSMUSG00000092599	1700010K23Rik	RIKEN cDNA 1700010K23 gene	ncRNA
chr16-2760	chr16	66684899	66686223	+	10.4	1324	intron (NM_178721, intron 8 of 9)	intron (NM_178721, intron 8 of 9)	28443	NR_040512	75501	Mm.394300	NR_040512	ENSMUSG00000092599	1700010K23Rik	RIKEN cDNA 1700010K23 gene	ncRNA
chr16-2762	chr16	67124389	67125654	+	10.4	1265	intron (NM_178721, intron 1 of 9)	intron (NM_178721, intron 1 of 9)	467903	NR_040512	75501	Mm.394300	NR_040512	ENSMUSG00000092599	1700010K23Rik	RIKEN cDNA 1700010K23 gene	ncRNA
chr16-7108	chr16	66381872	66383325	+	10.4	1453	Intergenic	MTB_Mm-int|LTR|ERVL-MaLR	-274520	NR_040512	75501	Mm.394300	NR_040512	ENSMUSG00000092599	1700010K23Rik	RIKEN cDNA 1700010K23 gene	ncRNA
chr16-7122	chr16	67104768	67106025	+	9.52	1257	intron (NM_178721, intron 1 of 9)	intron (NM_178721, intron 1 of 9)	448278	NR_040512	75501	Mm.394300	NR_040512	ENSMUSG00000092599	1700010K23Rik	RIKEN cDNA 1700010K23 gene	ncRNA
chr16-4025	chr16	66378242	66379242	+	8.79	1000	Intergenic	Intergenic	-278376	NR_040512	75501	Mm.394300	NR_040512	ENSMUSG00000092599	1700010K23Rik	RIKEN cDNA 1700010K23 gene	ncRNA
chr16-5893	chr16	66681841	66682841	+	8.42	1000	intron (NM_178721, intron 8 of 9)	intron (NM_178721, intron 8 of 9)	25223	NR_040512	75501	Mm.394300	NR_040512	ENSMUSG00000092599	1700010K23Rik	RIKEN cDNA 1700010K23 gene	ncRNA
chr16-5900	chr16	67028312	67029312	+	8.42	1000	intron (NM_178721, intron 1 of 9)	intron (NM_178721, intron 1 of 9)	371694	NR_040512	75501	Mm.394300	NR_040512	ENSMUSG00000092599	1700010K23Rik	RIKEN cDNA 1700010K23 gene	ncRNA
chr16-4024	chr16	66341649	66342649	+	8.42	1000	Intergenic	ORR1C2-int|LTR|ERVL-MaLR	-314969	NR_040512	75501	Mm.394300	NR_040512	ENSMUSG00000092599	1700010K23Rik	RIKEN cDNA 1700010K23 gene	ncRNA
chr16-5892	chr16	66670721	66671721	+	8.42	1000	intron (NM_178721, intron 8 of 9)	intron (NM_178721, intron 8 of 9)	14103	NR_040512	75501	Mm.394300	NR_040512	ENSMUSG00000092599	1700010K23Rik	RIKEN cDNA 1700010K23 gene	ncRNA
chr16-5899	chr16	66967701	66968701	+	8.24	1000	intron (NM_178721, intron 1 of 9)	intron (NM_178721, intron 1 of 9)	311083	NR_040512	75501	Mm.394300	NR_040512	ENSMUSG00000092599	1700010K23Rik	RIKEN cDNA 1700010K23 gene	ncRNA
chr16-7121	chr16	66997410	66998410	+	8.24	1000	intron (NM_178721, intron 1 of 9)	intron (NM_178721, intron 1 of 9)	340792	NR_040512	75501	Mm.394300	NR_040512	ENSMUSG00000092599	1700010K23Rik	RIKEN cDNA 1700010K23 gene	ncRNA
chr16-4031	chr16	66776204	66777204	+	8.05	1000	intron (NM_178721, intron 6 of 9)	intron (NM_178721, intron 6 of 9)	119586	NR_040512	75501	Mm.394300	NR_040512	ENSMUSG00000092599	1700010K23Rik	RIKEN cDNA 1700010K23 gene	ncRNA
chr16-7102	chr16	66297004	66298004	+	8.05	1000	Intergenic	Intergenic	-359614	NR_040512	75501	Mm.394300	NR_040512	ENSMUSG00000092599	1700010K23Rik	RIKEN cDNA 1700010K23 gene	ncRNA
chr16-4901	chr16	66883306	66884306	+	8.05	1000	intron (NM_001145977, intron 1 of 8)	intron (NM_001145977, intron 1 of 8)	226688	NR_040512	75501	Mm.394300	NR_040512	ENSMUSG00000092599	1700010K23Rik	RIKEN cDNA 1700010K23 gene	ncRNA
chr16-5891	chr16	66635741	66636741	+	7.69	1000	Intergenic	Intergenic	-20877	NR_040512	75501	Mm.394300	NR_040512	ENSMUSG00000092599	1700010K23Rik	RIKEN cDNA 1700010K23 gene	ncRNA
chr16-7115	chr16	66619540	66620540	+	7.69	1000	Intergenic	Intergenic	-37078	NR_040512	75501	Mm.394300	NR_040512	ENSMUSG00000092599	1700010K23Rik	RIKEN cDNA 1700010K23 gene	ncRNA
chr16-7116	chr16	66698534	66699534	+	7.5	1000	intron (NM_178721, intron 8 of 9)	ORR1A4-int|LTR|ERVL-MaLR	41916	NR_040512	75501	Mm.394300	NR_040512	ENSMUSG00000092599	1700010K23Rik	RIKEN cDNA 1700010K23 gene	ncRNA
chr13-6956	chr13	35324876	35327281	+	20.5	2405	Intergenic	L1_Rod|LINE|L1	144455	NR_045616	100503727	Mm.32214	NR_045616		1700011B04Rik	RIKEN cDNA 1700011B04 gene	ncRNA
chr13-5119	chr13	35139683	35141975	+	18.5	2292	Intergenic	B1_Mur3|SINE|Alu	-40794	NR_045616	100503727	Mm.32214	NR_045616		1700011B04Rik	RIKEN cDNA 1700011B04 gene	ncRNA
chr13-8042	chr13	35268222	35270410	+	17.4	2188	Intergenic	Intergenic	87693	NR_045616	100503727	Mm.32214	NR_045616		1700011B04Rik	RIKEN cDNA 1700011B04 gene	ncRNA
chr13-6955	chr13	35157884	35158884	+	8.24	1000	Intergenic	RMER19B2|LTR|ERVK	-23239	NR_045616	100503727	Mm.32214	NR_045616		1700011B04Rik	RIKEN cDNA 1700011B04 gene	ncRNA
chr13-6954	chr13	35109126	35110126	+	8.05	1000	Intergenic	MurERV4-int|LTR|ERVK	-71997	NR_045616	100503727	Mm.32214	NR_045616		1700011B04Rik	RIKEN cDNA 1700011B04 gene	ncRNA
chr17-8843	chr17	87371897	87372897	+	8.24	1000	intron (NM_028639, intron 19 of 19)	intron (NM_028639, intron 19 of 19)	55344	NM_029298	75467	Mm.50108	NM_029298	ENSMUSG00000036557	1700011E24Rik	RIKEN cDNA 1700011E24 gene	protein-coding
chr6-7129	chr6	32190577	32207004	+	140.8	16427	intron (NM_175750, intron 16 of 31)	intron (NM_175750, intron 16 of 31)	148502	NM_029587	76382	Mm.23510	NM_029587	ENSMUSG00000029766	1700012A03Rik	RIKEN cDNA 1700012A03 gene	protein-coding
chr6-7127	chr6	31846395	31848931	+	22.1	2536	Intergenic	IMPB_01|Satellite|Satellite	-202625	NM_029587	76382	Mm.23510	NM_029587	ENSMUSG00000029766	1700012A03Rik	RIKEN cDNA 1700012A03 gene	protein-coding
chr6-10141	chr6	32209157	32211182	+	15.4	2025	intron (NM_175750, intron 13 of 31)	intron (NM_175750, intron 13 of 31)	159881	NM_029587	76382	Mm.23510	NM_029587	ENSMUSG00000029766	1700012A03Rik	RIKEN cDNA 1700012A03 gene	protein-coding
chr6-1485	chr6	32091268	32092268	+	10.3	1000	Intergenic	Intergenic	41480	NM_029587	76382	Mm.23510	NM_029587	ENSMUSG00000029766	1700012A03Rik	RIKEN cDNA 1700012A03 gene	protein-coding
chr6-10139	chr6	31854905	31856156	+	9.52	1251	Intergenic	Intergenic	-194758	NM_029587	76382	Mm.23510	NM_029587	ENSMUSG00000029766	1700012A03Rik	RIKEN cDNA 1700012A03 gene	protein-coding
chr6-3565	chr6	32214550	32215550	+	9.33	1000	intron (NM_175750, intron 12 of 31)	intron (NM_175750, intron 12 of 31)	164762	NM_029587	76382	Mm.23510	NM_029587	ENSMUSG00000029766	1700012A03Rik	RIKEN cDNA 1700012A03 gene	protein-coding
chr6-7128	chr6	31936930	31937930	+	8.6	1000	Intergenic	Intergenic	-112858	NM_029587	76382	Mm.23510	NM_029587	ENSMUSG00000029766	1700012A03Rik	RIKEN cDNA 1700012A03 gene	protein-coding
chr6-8517	chr6	32276138	32277138	+	8.42	1000	intron (NM_175750, intron 4 of 31)	MER2|DNA|TcMar-Tigger	226350	NM_029587	76382	Mm.23510	NM_029587	ENSMUSG00000029766	1700012A03Rik	RIKEN cDNA 1700012A03 gene	protein-coding
chr6-8516	chr6	32250838	32251838	+	8.42	1000	intron (NM_175750, intron 4 of 31)	intron (NM_175750, intron 4 of 31)	201050	NM_029587	76382	Mm.23510	NM_029587	ENSMUSG00000029766	1700012A03Rik	RIKEN cDNA 1700012A03 gene	protein-coding
chr6-11973	chr6	32174083	32175083	+	8.05	1000	intron (NM_175750, intron 25 of 31)	MLT2D|LTR|ERVL	124295	NM_029587	76382	Mm.23510	NM_029587	ENSMUSG00000029766	1700012A03Rik	RIKEN cDNA 1700012A03 gene	protein-coding
chr6-11977	chr6	32242142	32243142	+	8.05	1000	intron (NM_175750, intron 5 of 31)	intron (NM_175750, intron 5 of 31)	192354	NM_029587	76382	Mm.23510	NM_029587	ENSMUSG00000029766	1700012A03Rik	RIKEN cDNA 1700012A03 gene	protein-coding
chr6-11974	chr6	32183736	32184736	+	7.87	1000	intron (NM_175750, intron 22 of 31)	intron (NM_175750, intron 22 of 31)	133948	NM_029587	76382	Mm.23510	NM_029587	ENSMUSG00000029766	1700012A03Rik	RIKEN cDNA 1700012A03 gene	protein-coding
chr11-7315	chr11	109796126	109799797	+	29.7	3671	intron (NM_001162428, intron 2 of 5)	B2_Mm2|SINE|B2	30085	NM_027038	69324	Mm.31700	NM_027038	ENSMUSG00000020617	1700012B07Rik	RIKEN cDNA 1700012B07 gene	protein-coding
chr7-7190	chr7	111402362	111403362	+	8.97	1000	Intergenic	Lx2B2|LINE|L1	-280187	NR_015573	75479	Mm.381620	NR_015573		1700012D14Rik	RIKEN cDNA 1700012D14 gene	ncRNA
chr7-9698	chr7	111310911	111311911	+	8.79	1000	Intergenic	Intergenic	-188736	NR_015573	75479	Mm.381620	NR_015573		1700012D14Rik	RIKEN cDNA 1700012D14 gene	ncRNA
chr15-3726	chr15	67503038	67507058	+	32.9	4020	Intergenic	RMER15-int|LTR|ERVL	278279	NR_045140	69334	Mm.63770	NR_045140		1700012I11Rik	RIKEN cDNA 1700012I11 gene	ncRNA
chr15-5148	chr15	67601468	67604614	+	26.4	3146	Intergenic	Intergenic	376272	NR_045140	69334	Mm.63770	NR_045140		1700012I11Rik	RIKEN cDNA 1700012I11 gene	ncRNA
chr15-6090	chr15	67651238	67653540	+	17.4	2302	Intergenic	Intergenic	425620	NR_045140	69334	Mm.63770	NR_045140		1700012I11Rik	RIKEN cDNA 1700012I11 gene	ncRNA
chr15-5144	chr15	67272618	67274199	+	12.8	1581	intron (NR_045140, intron 4 of 8)	MTE2b|LTR|ERVL-MaLR	46639	NR_045140	69334	Mm.63770	NR_045140		1700012I11Rik	RIKEN cDNA 1700012I11 gene	ncRNA
chr15-6093	chr15	67691984	67693520	+	12.1	1536	Intergenic	Intergenic	465983	NR_045140	69334	Mm.63770	NR_045140		1700012I11Rik	RIKEN cDNA 1700012I11 gene	ncRNA
chr15-4366	chr15	67564253	67565253	+	8.6	1000	Intergenic	Intergenic	337984	NR_045140	69334	Mm.63770	NR_045140		1700012I11Rik	RIKEN cDNA 1700012I11 gene	ncRNA
chr15-3163	chr15	67349104	67350104	+	8.42	1000	intron (NR_045140, intron 7 of 8)	intron (NR_045140, intron 7 of 8)	122835	NR_045140	69334	Mm.63770	NR_045140		1700012I11Rik	RIKEN cDNA 1700012I11 gene	ncRNA
chr15-5150	chr15	67626012	67627012	+	8.42	1000	Intergenic	Intergenic	399743	NR_045140	69334	Mm.63770	NR_045140		1700012I11Rik	RIKEN cDNA 1700012I11 gene	ncRNA
chr15-5151	chr15	67700110	67701110	+	8.24	1000	Intergenic	Intergenic	473841	NR_045140	69334	Mm.63770	NR_045140		1700012I11Rik	RIKEN cDNA 1700012I11 gene	ncRNA
chr15-4367	chr15	67660675	67661675	+	8.24	1000	Intergenic	L1ME4b|LINE|L1	434406	NR_045140	69334	Mm.63770	NR_045140		1700012I11Rik	RIKEN cDNA 1700012I11 gene	ncRNA
chr15-6089	chr15	67628978	67629978	+	7.87	1000	Intergenic	Intergenic	402709	NR_045140	69334	Mm.63770	NR_045140		1700012I11Rik	RIKEN cDNA 1700012I11 gene	ncRNA
chr6-11096	chr6	124341151	124342545	+	11	1394	Intergenic	Intergenic	15238	NM_001177502	76921	Mm.425335	NM_001177502	ENSMUSG00000079346	1700013D24Rik	RIKEN cDNA 1700013D24 gene	protein-coding
chr1-16340	chr1	170415849	170416849	+	8.24	1000	intron (NM_001109985, intron 2 of 9)	intron (NM_001109985, intron 2 of 9)	107488	NM_001039593	76925	Mm.33631	NM_001039593	ENSMUSG00000042800	1700015E13Rik	RIKEN cDNA 1700015E13 gene	protein-coding
chr7-12322	chr7	52544373	52552641	+	66.4	8268	Intergenic	LTR68|LTR|ERV1	-532791	NM_001195601	100503036	Mm.279725	NM_001195601	ENSMUSG00000094445	1700015G11Rik	RIKEN cDNA 1700015G11 gene	protein-coding
chr7-10730	chr7	52400205	52404479	+	30.9	4274	Intergenic	Intergenic	-386626	NM_001195601	100503036	Mm.279725	NM_001195601	ENSMUSG00000094445	1700015G11Rik	RIKEN cDNA 1700015G11 gene	protein-coding
chr7-9271	chr7	52903671	52906860	+	25.1	3189	Intergenic	Intergenic	-889549	NM_001195601	100503036	Mm.279725	NM_001195601	ENSMUSG00000094445	1700015G11Rik	RIKEN cDNA 1700015G11 gene	protein-coding
chr7-12317	chr7	52130947	52134289	+	23.1	3342	Intergenic	RMER16-int|LTR|ERVK	-116902	NM_001195601	100503036	Mm.279725	NM_001195601	ENSMUSG00000094445	1700015G11Rik	RIKEN cDNA 1700015G11 gene	protein-coding
chr7-5898	chr7	52174785	52177271	+	20.3	2486	Intergenic	RMER17A2|LTR|ERVK	-160312	NM_001195601	100503036	Mm.279725	NM_001195601	ENSMUSG00000094445	1700015G11Rik	RIKEN cDNA 1700015G11 gene	protein-coding
chr7-10734	chr7	52891683	52894042	+	19.2	2359	Intergenic	Intergenic	-877146	NM_001195601	100503036	Mm.279725	NM_001195601	ENSMUSG00000094445	1700015G11Rik	RIKEN cDNA 1700015G11 gene	protein-coding
chr7-10732	chr7	52470553	52472824	+	18.7	2271	Intergenic	L1VL4|LINE|L1	-455972	NM_001195601	100503036	Mm.279725	NM_001195601	ENSMUSG00000094445	1700015G11Rik	RIKEN cDNA 1700015G11 gene	protein-coding
chr7-10727	chr7	52224679	52226918	+	16.8	2239	Intergenic	(TA)n|Simple_repeat|Simple_repeat	-210082	NM_001195601	100503036	Mm.279725	NM_001195601	ENSMUSG00000094445	1700015G11Rik	RIKEN cDNA 1700015G11 gene	protein-coding
chr7-5071	chr7	52932585	52934496	+	16.5	1911	Intergenic	Intergenic	-917824	NM_001195601	100503036	Mm.279725	NM_001195601	ENSMUSG00000094445	1700015G11Rik	RIKEN cDNA 1700015G11 gene	protein-coding
chr7-10725	chr7	52033110	52035031	+	15.7	1921	Intergenic	RMER3D-int|LTR|ERVK	-18354	NM_001195601	100503036	Mm.279725	NM_001195601	ENSMUSG00000094445	1700015G11Rik	RIKEN cDNA 1700015G11 gene	protein-coding
chr7-2387	chr7	52951765	52953081	+	11.7	1316	Intergenic	L1Md_F2|LINE|L1	-936707	NM_001195601	100503036	Mm.279725	NM_001195601	ENSMUSG00000094445	1700015G11Rik	RIKEN cDNA 1700015G11 gene	protein-coding
chr7-5068	chr7	52321084	52322395	+	11.5	1311	Intergenic	MERVK26-int|LTR|ERVK	-306023	NM_001195601	100503036	Mm.279725	NM_001195601	ENSMUSG00000094445	1700015G11Rik	RIKEN cDNA 1700015G11 gene	protein-coding
chr7-12319	chr7	52388499	52389750	+	10.3	1251	Intergenic	Intergenic	-373408	NM_001195601	100503036	Mm.279725	NM_001195601	ENSMUSG00000094445	1700015G11Rik	RIKEN cDNA 1700015G11 gene	protein-coding
chr7-4362	chr7	52377611	52378611	+	8.97	1000	Intergenic	L1_Mur2|LINE|L1	-362395	NM_001195601	100503036	Mm.279725	NM_001195601	ENSMUSG00000094445	1700015G11Rik	RIKEN cDNA 1700015G11 gene	protein-coding
chr7-7983	chr7	52408280	52409280	+	8.97	1000	Intergenic	(TCTCTG)n|Simple_repeat|Simple_repeat	-393064	NM_001195601	100503036	Mm.279725	NM_001195601	ENSMUSG00000094445	1700015G11Rik	RIKEN cDNA 1700015G11 gene	protein-coding
chr7-6883	chr7	52221507	52222507	+	8.79	1000	Intergenic	Intergenic	-206291	NM_001195601	100503036	Mm.279725	NM_001195601	ENSMUSG00000094445	1700015G11Rik	RIKEN cDNA 1700015G11 gene	protein-coding
chr7-12320	chr7	52420359	52421359	+	8.42	1000	Intergenic	Intergenic	-405143	NM_001195601	100503036	Mm.279725	NM_001195601	ENSMUSG00000094445	1700015G11Rik	RIKEN cDNA 1700015G11 gene	protein-coding
chr7-12324	chr7	52656116	52657116	+	8.42	1000	Intergenic	Intergenic	-640900	NM_001195601	100503036	Mm.279725	NM_001195601	ENSMUSG00000094445	1700015G11Rik	RIKEN cDNA 1700015G11 gene	protein-coding
chr7-14124	chr7	52162183	52163183	+	8.24	1000	Intergenic	Intergenic	-146967	NM_001195601	100503036	Mm.279725	NM_001195601	ENSMUSG00000094445	1700015G11Rik	RIKEN cDNA 1700015G11 gene	protein-coding
chr7-10733	chr7	52799122	52800122	+	8.24	1000	Intergenic	Intergenic	-783906	NM_001195601	100503036	Mm.279725	NM_001195601	ENSMUSG00000094445	1700015G11Rik	RIKEN cDNA 1700015G11 gene	protein-coding
chr7-12316	chr7	52024024	52025024	+	8.24	1000	Intergenic	SRV_MM-int|LTR|ERVK	-8808	NM_001195601	100503036	Mm.279725	NM_001195601	ENSMUSG00000094445	1700015G11Rik	RIKEN cDNA 1700015G11 gene	protein-coding
chr13-2389	chr13	5249106	5254902	+	46.3	5796	Intergenic	(TG)n|Simple_repeat|Simple_repeat	606088	NR_045891	71867	Mm.179181	NR_045891		1700016G22Rik	RIKEN cDNA 1700016G22 gene	ncRNA
chr13-4917	chr13	5239756	5243681	+	31.3	3925	Intergenic	Intergenic	616374	NR_045891	71867	Mm.179181	NR_045891		1700016G22Rik	RIKEN cDNA 1700016G22 gene	ncRNA
chr13-6644	chr13	5271254	5275331	+	31.1	4077	Intergenic	Intergenic	584800	NR_045891	71867	Mm.179181	NR_045891		1700016G22Rik	RIKEN cDNA 1700016G22 gene	ncRNA
chr13-7711	chr13	5462652	5465010	+	20.7	2358	Intergenic	Lx4A|LINE|L1	394261	NR_045891	71867	Mm.179181	NR_045891		1700016G22Rik	RIKEN cDNA 1700016G22 gene	ncRNA
chr13-2754	chr13	5818198	5820049	+	17	1851	Intergenic	Intergenic	38969	NR_045891	71867	Mm.179181	NR_045891		1700016G22Rik	RIKEN cDNA 1700016G22 gene	ncRNA
chr13-5706	chr13	5284068	5286165	+	17	2097	Intergenic	(CA)n|Simple_repeat|Simple_repeat	572976	NR_045891	71867	Mm.179181	NR_045891		1700016G22Rik	RIKEN cDNA 1700016G22 gene	ncRNA
chr13-5707	chr13	5295012	5296792	+	14.3	1780	Intergenic	B4|SINE|B4	562190	NR_045891	71867	Mm.179181	NR_045891		1700016G22Rik	RIKEN cDNA 1700016G22 gene	ncRNA
chr13-5710	chr13	5744126	5745745	+	12.6	1619	Intergenic	Intergenic	113157	NR_045891	71867	Mm.179181	NR_045891		1700016G22Rik	RIKEN cDNA 1700016G22 gene	ncRNA
chr13-7709	chr13	5443696	5445345	+	12.6	1649	Intergenic	Intergenic	413572	NR_045891	71867	Mm.179181	NR_045891		1700016G22Rik	RIKEN cDNA 1700016G22 gene	ncRNA
chr13-6647	chr13	5452572	5453850	+	9.7	1278	Intergenic	Intergenic	404881	NR_045891	71867	Mm.179181	NR_045891		1700016G22Rik	RIKEN cDNA 1700016G22 gene	ncRNA
chr13-4921	chr13	5639759	5640759	+	8.79	1000	Intergenic	B4|SINE|B4	217833	NR_045891	71867	Mm.179181	NR_045891		1700016G22Rik	RIKEN cDNA 1700016G22 gene	ncRNA
chr13-5708	chr13	5430954	5431954	+	8.42	1000	Intergenic	Intergenic	426638	NR_045891	71867	Mm.179181	NR_045891		1700016G22Rik	RIKEN cDNA 1700016G22 gene	ncRNA
chr13-4920	chr13	5320886	5321886	+	8.24	1000	Intergenic	Intergenic	536706	NR_045891	71867	Mm.179181	NR_045891		1700016G22Rik	RIKEN cDNA 1700016G22 gene	ncRNA
chr13-7708	chr13	5358012	5359012	+	8.24	1000	Intergenic	Lx9|LINE|L1	499580	NR_045891	71867	Mm.179181	NR_045891		1700016G22Rik	RIKEN cDNA 1700016G22 gene	ncRNA
chr13-7712	chr13	5649196	5650196	+	8.05	1000	Intergenic	L1Md_F|LINE|L1	208396	NR_045891	71867	Mm.179181	NR_045891		1700016G22Rik	RIKEN cDNA 1700016G22 gene	ncRNA
chr5-11539	chr5	103694766	103698874	+	32.8	4108	Intergenic	Intergenic	-41088	NM_001163550	74218	Mm.159141	NM_028824	ENSMUSG00000029320	1700016H13Rik	RIKEN cDNA 1700016H13 gene	protein-coding
chr5-17805	chr5	103683884	103686164	+	17.4	2280	Intergenic	B1_Mus2|SINE|Alu	-29292	NM_001163550	74218	Mm.159141	NM_028824	ENSMUSG00000029320	1700016H13Rik	RIKEN cDNA 1700016H13 gene	protein-coding
chr5-10008	chr5	103688988	103690627	+	13.9	1639	Intergenic	Intergenic	-34075	NM_001163550	74218	Mm.159141	NM_028824	ENSMUSG00000029320	1700016H13Rik	RIKEN cDNA 1700016H13 gene	protein-coding
chr5-17804	chr5	103660916	103661916	+	7.5	1000	Intergenic	Intergenic	-5684	NM_001163550	74218	Mm.159141	NM_028824	ENSMUSG00000029320	1700016H13Rik	RIKEN cDNA 1700016H13 gene	protein-coding
chr11-7944	chr11	75968555	75969829	+	10.1	1274	Intergenic	ID_B1|SINE|B4	-30720	NM_198637	74230	Mm.271247	NM_198637	ENSMUSG00000053783	1700016K19Rik	RIKEN cDNA 1700016K19 gene	protein-coding
chr11-4751	chr11	75964153	75965153	+	8.42	1000	Intergenic	MIRc|SINE|MIR	-35259	NM_198637	74230	Mm.271247	NM_198637	ENSMUSG00000053783	1700016K19Rik	RIKEN cDNA 1700016K19 gene	protein-coding
chr1-5478	chr1	80432304	80435113	+	23.2	2809	Intergenic	MLT1D|LTR|ERVL-MaLR	-12224	NR_040460	72208	Mm.396181	NR_040460		1700016L21Rik	RIKEN cDNA 1700016L21 gene	ncRNA
chr6-8244	chr6	13503522	13509121	+	42.8	5599	Intergenic	Intergenic	92984	NR_038149	69413	Mm.177847	NR_038149		1700016P04Rik	RIKEN cDNA 1700016P04 gene	ncRNA
chr6-2432	chr6	13415869	13418785	+	24.5	2916	Intergenic	Intergenic	3990	NR_038149	69413	Mm.177847	NR_038149		1700016P04Rik	RIKEN cDNA 1700016P04 gene	ncRNA
chr6-11624	chr6	13326346	13329215	+	21.4	2869	Intergenic	L1M4|LINE|L1	-85557	NR_038149	69413	Mm.177847	NR_038149		1700016P04Rik	RIKEN cDNA 1700016P04 gene	ncRNA
chr6-6913	chr6	13492245	13494996	+	21	2751	Intergenic	L1M2|LINE|L1	80283	NR_038149	69413	Mm.177847	NR_038149		1700016P04Rik	RIKEN cDNA 1700016P04 gene	ncRNA
chr6-11623	chr6	13321592	13323816	+	17.8	2224	Intergenic	Intergenic	-90633	NR_038149	69413	Mm.177847	NR_038149		1700016P04Rik	RIKEN cDNA 1700016P04 gene	ncRNA
chr6-9803	chr6	13462086	13463893	+	14.1	1807	Intergenic	Lx2|LINE|L1	49652	NR_038149	69413	Mm.177847	NR_038149		1700016P04Rik	RIKEN cDNA 1700016P04 gene	ncRNA
chr6-1218	chr6	13397744	13399176	+	13.9	1432	Intergenic	Intergenic	-14877	NR_038149	69413	Mm.177847	NR_038149		1700016P04Rik	RIKEN cDNA 1700016P04 gene	ncRNA
chr6-8243	chr6	13387786	13389487	+	13.7	1701	Intergenic	Intergenic	-24701	NR_038149	69413	Mm.177847	NR_038149		1700016P04Rik	RIKEN cDNA 1700016P04 gene	ncRNA
chr6-6910	chr6	13368499	13370060	+	13.7	1561	Intergenic	Intergenic	-44058	NR_038149	69413	Mm.177847	NR_038149		1700016P04Rik	RIKEN cDNA 1700016P04 gene	ncRNA
chr6-9797	chr6	13353375	13354980	+	13.2	1605	Intergenic	Intergenic	-59160	NR_038149	69413	Mm.177847	NR_038149		1700016P04Rik	RIKEN cDNA 1700016P04 gene	ncRNA
chr6-11627	chr6	13426480	13428049	+	13	1569	Intergenic	Intergenic	13927	NR_038149	69413	Mm.177847	NR_038149		1700016P04Rik	RIKEN cDNA 1700016P04 gene	ncRNA
chr6-11625	chr6	13348748	13350262	+	11.5	1514	Intergenic	L1MA7|LINE|L1	-63832	NR_038149	69413	Mm.177847	NR_038149		1700016P04Rik	RIKEN cDNA 1700016P04 gene	ncRNA
chr6-6912	chr6	13449411	13450689	+	11	1278	Intergenic	Intergenic	36713	NR_038149	69413	Mm.177847	NR_038149		1700016P04Rik	RIKEN cDNA 1700016P04 gene	ncRNA
chr6-6911	chr6	13436673	13437966	+	10.4	1293	Intergenic	Lx2|LINE|L1	23982	NR_038149	69413	Mm.177847	NR_038149		1700016P04Rik	RIKEN cDNA 1700016P04 gene	ncRNA
chr6-9804	chr6	13488587	13489888	+	9.88	1301	Intergenic	RMER17A|LTR|ERVK	75900	NR_038149	69413	Mm.177847	NR_038149		1700016P04Rik	RIKEN cDNA 1700016P04 gene	ncRNA
chr6-9800	chr6	13410632	13411632	+	8.24	1000	Intergenic	Lx6|LINE|L1	-2205	NR_038149	69413	Mm.177847	NR_038149		1700016P04Rik	RIKEN cDNA 1700016P04 gene	ncRNA
chr6-9799	chr6	13404396	13405396	+	8.05	1000	Intergenic	Lx4A|LINE|L1	-8441	NR_038149	69413	Mm.177847	NR_038149		1700016P04Rik	RIKEN cDNA 1700016P04 gene	ncRNA
chr6-11629	chr6	13439491	13440491	+	7.87	1000	Intergenic	MLT1F-int|LTR|ERVL-MaLR	26654	NR_038149	69413	Mm.177847	NR_038149		1700016P04Rik	RIKEN cDNA 1700016P04 gene	ncRNA
chr3-1128	chr3	40525978	40533561	+	65.2	7583	Intergenic	B3|SINE|B2	-6857	NR_040445	100040882	Mm.272869	NR_040445	ENSMUSG00000037884	1700017G19Rik	RIKEN cDNA 1700017G19 gene	ncRNA
chr3-4874	chr3	39916286	39918478	+	18.9	2192	Intergenic	L1M2|LINE|L1	605530	NR_040445	100040882	Mm.272869	NR_040445	ENSMUSG00000037884	1700017G19Rik	RIKEN cDNA 1700017G19 gene	ncRNA
chr3-14041	chr3	40234603	40236818	+	17.6	2215	Intergenic	L1_Mur2|LINE|L1	287202	NR_040445	100040882	Mm.272869	NR_040445	ENSMUSG00000037884	1700017G19Rik	RIKEN cDNA 1700017G19 gene	ncRNA
chr3-11817	chr3	39819058	39821151	+	17.2	2093	Intergenic	Intergenic	702808	NR_040445	100040882	Mm.272869	NR_040445	ENSMUSG00000037884	1700017G19Rik	RIKEN cDNA 1700017G19 gene	ncRNA
chr3-11820	chr3	40089709	40091649	+	16.7	1940	Intergenic	Intergenic	432233	NR_040445	100040882	Mm.272869	NR_040445	ENSMUSG00000037884	1700017G19Rik	RIKEN cDNA 1700017G19 gene	ncRNA
chr3-7016	chr3	40284745	40286443	+	13.5	1698	Intergenic	RMER19B2|LTR|ERVK	237318	NR_040445	100040882	Mm.272869	NR_040445	ENSMUSG00000037884	1700017G19Rik	RIKEN cDNA 1700017G19 gene	ncRNA
chr3-8376	chr3	40520241	40521492	+	10.1	1251	intron (NR_040445, intron 2 of 5)	B1F|SINE|Alu	2046	NR_040445	100040882	Mm.272869	NR_040445	ENSMUSG00000037884	1700017G19Rik	RIKEN cDNA 1700017G19 gene	ncRNA
chr3-8375	chr3	40270381	40271381	+	8.6	1000	Intergenic	MLT1G|LTR|ERVL-MaLR	252031	NR_040445	100040882	Mm.272869	NR_040445	ENSMUSG00000037884	1700017G19Rik	RIKEN cDNA 1700017G19 gene	ncRNA
chr3-11821	chr3	40188192	40189192	+	8.42	1000	Intergenic	B1F|SINE|Alu	334220	NR_040445	100040882	Mm.272869	NR_040445	ENSMUSG00000037884	1700017G19Rik	RIKEN cDNA 1700017G19 gene	ncRNA
chr3-11822	chr3	40214888	40215888	+	8.24	1000	Intergenic	Lx6|LINE|L1	307524	NR_040445	100040882	Mm.272869	NR_040445	ENSMUSG00000037884	1700017G19Rik	RIKEN cDNA 1700017G19 gene	ncRNA
chr3-7015	chr3	39973236	39974236	+	8.24	1000	Intergenic	L1VL2|LINE|L1	549176	NR_040445	100040882	Mm.272869	NR_040445	ENSMUSG00000037884	1700017G19Rik	RIKEN cDNA 1700017G19 gene	ncRNA
chr3-11819	chr3	40011425	40012425	+	8.24	1000	Intergenic	Intergenic	510987	NR_040445	100040882	Mm.272869	NR_040445	ENSMUSG00000037884	1700017G19Rik	RIKEN cDNA 1700017G19 gene	ncRNA
chr3-14045	chr3	40353783	40354783	+	7.87	1000	Intergenic	Arthur1|DNA|hAT-Tip100	168629	NR_040445	100040882	Mm.272869	NR_040445	ENSMUSG00000037884	1700017G19Rik	RIKEN cDNA 1700017G19 gene	ncRNA
chr3-14040	chr3	40014545	40015545	+	7.5	1000	Intergenic	MTEa|LTR|ERVL-MaLR	507867	NR_040445	100040882	Mm.272869	NR_040445	ENSMUSG00000037884	1700017G19Rik	RIKEN cDNA 1700017G19 gene	ncRNA
chr2-4891	chr2	169295235	169300807	+	49.6	5572	Intergenic	Intergenic	319752	NR_040326	75508	Mm.271256	NR_040326	ENSMUSG00000086348	1700017J07Rik	RIKEN cDNA 1700017J07 gene	ncRNA
chr2-9443	chr2	169176416	169180016	+	31.7	3600	Intergenic	Intergenic	199947	NR_040326	75508	Mm.271256	NR_040326	ENSMUSG00000086348	1700017J07Rik	RIKEN cDNA 1700017J07 gene	ncRNA
chr2-11080	chr2	169163857	169166267	+	21.6	2410	Intergenic	Intergenic	186793	NR_040326	75508	Mm.271256	NR_040326	ENSMUSG00000086348	1700017J07Rik	RIKEN cDNA 1700017J07 gene	ncRNA
chr2-11082	chr2	169204828	169205828	+	8.24	1000	Intergenic	Intergenic	227059	NR_040326	75508	Mm.271256	NR_040326	ENSMUSG00000086348	1700017J07Rik	RIKEN cDNA 1700017J07 gene	ncRNA
chr2-11081	chr2	169194180	169195180	+	8.05	1000	Intergenic	B1F|SINE|Alu	216411	NR_040326	75508	Mm.271256	NR_040326	ENSMUSG00000086348	1700017J07Rik	RIKEN cDNA 1700017J07 gene	ncRNA
chr2-13010	chr2	169209827	169210827	+	7.69	1000	Intergenic	RLTR44A|LTR|ERVK	232058	NR_040326	75508	Mm.271256	NR_040326	ENSMUSG00000086348	1700017J07Rik	RIKEN cDNA 1700017J07 gene	ncRNA
chr10-7218	chr10	101089654	101096725	+	51.1	7071	Intergenic	ORR1B1|LTR|ERVL-MaLR	500803	NM_001081246	66605	Mm.72646	NM_001081246	ENSMUSG00000056912	1700017N19Rik	RIKEN cDNA 1700017N19 gene	protein-coding
chr10-8554	chr10	100847061	100851144	+	26.5	4083	Intergenic	(TCTA)n|Simple_repeat|Simple_repeat	256716	NM_001081246	66605	Mm.72646	NM_001081246	ENSMUSG00000056912	1700017N19Rik	RIKEN cDNA 1700017N19 gene	protein-coding
chr10-10067	chr10	100857832	100860884	+	24	3052	Intergenic	Intergenic	266972	NM_001081246	66605	Mm.72646	NM_001081246	ENSMUSG00000056912	1700017N19Rik	RIKEN cDNA 1700017N19 gene	protein-coding
chr10-7217	chr10	101029004	101031934	+	20.1	2930	Intergenic	Intergenic	438083	NM_001081246	66605	Mm.72646	NM_001081246	ENSMUSG00000056912	1700017N19Rik	RIKEN cDNA 1700017N19 gene	protein-coding
chr10-7214	chr10	100754749	100757162	+	18.5	2413	Intergenic	Intergenic	163569	NM_001081246	66605	Mm.72646	NM_001081246	ENSMUSG00000056912	1700017N19Rik	RIKEN cDNA 1700017N19 gene	protein-coding
chr10-10071	chr10	100972622	100974415	+	15.2	1793	Intergenic	Intergenic	381132	NM_001081246	66605	Mm.72646	NM_001081246	ENSMUSG00000056912	1700017N19Rik	RIKEN cDNA 1700017N19 gene	protein-coding
chr10-7210	chr10	100602232	100603852	+	12.6	1620	intron (NM_001081246, intron 4 of 12)	intron (NM_001081246, intron 4 of 12)	10656	NM_001081246	66605	Mm.72646	NM_001081246	ENSMUSG00000056912	1700017N19Rik	RIKEN cDNA 1700017N19 gene	protein-coding
chr10-6087	chr10	100590533	100591911	+	12.3	1378	Intergenic	Intergenic	-1164	NM_001081246	66605	Mm.72646	NM_001081246	ENSMUSG00000056912	1700017N19Rik	RIKEN cDNA 1700017N19 gene	protein-coding
chr10-4366	chr10	101074585	101075962	+	11.2	1377	Intergenic	ERVL-int|LTR|ERVL	482887	NM_001081246	66605	Mm.72646	NM_001081246	ENSMUSG00000056912	1700017N19Rik	RIKEN cDNA 1700017N19 gene	protein-coding
chr10-8559	chr10	101101871	101103173	+	11.2	1302	Intergenic	Intergenic	510136	NM_001081246	66605	Mm.72646	NM_001081246	ENSMUSG00000056912	1700017N19Rik	RIKEN cDNA 1700017N19 gene	protein-coding
chr10-8552	chr10	100743025	100744357	+	11	1332	Intergenic	Intergenic	151305	NM_001081246	66605	Mm.72646	NM_001081246	ENSMUSG00000056912	1700017N19Rik	RIKEN cDNA 1700017N19 gene	protein-coding
chr10-3151	chr10	100598827	100599827	+	9.15	1000	intron (NM_001081246, intron 3 of 12)	L2a|LINE|L2	6941	NM_001081246	66605	Mm.72646	NM_001081246	ENSMUSG00000056912	1700017N19Rik	RIKEN cDNA 1700017N19 gene	protein-coding
chr10-8556	chr10	101025190	101026190	+	8.24	1000	Intergenic	Lx10|LINE|L1	433304	NM_001081246	66605	Mm.72646	NM_001081246	ENSMUSG00000056912	1700017N19Rik	RIKEN cDNA 1700017N19 gene	protein-coding
chr10-7212	chr10	100606142	100607142	+	8.24	1000	intron (NM_001081246, intron 7 of 12)	intron (NM_001081246, intron 7 of 12)	14256	NM_001081246	66605	Mm.72646	NM_001081246	ENSMUSG00000056912	1700017N19Rik	RIKEN cDNA 1700017N19 gene	protein-coding
chr10-7216	chr10	100914114	100915114	+	8.24	1000	Intergenic	RLTR11C_MM|LTR|ERVK	322228	NM_001081246	66605	Mm.72646	NM_001081246	ENSMUSG00000056912	1700017N19Rik	RIKEN cDNA 1700017N19 gene	protein-coding
chr10-10063	chr10	100618033	100619033	+	8.24	1000	TTS (NM_001081246)	TTS (NM_001081246)	26147	NM_001081246	66605	Mm.72646	NM_001081246	ENSMUSG00000056912	1700017N19Rik	RIKEN cDNA 1700017N19 gene	protein-coding
chr10-6089	chr10	100686600	100687600	+	8.24	1000	Intergenic	URR1B|DNA|hAT-Charlie	94714	NM_001081246	66605	Mm.72646	NM_001081246	ENSMUSG00000056912	1700017N19Rik	RIKEN cDNA 1700017N19 gene	protein-coding
chr10-10070	chr10	100952872	100953872	+	7.87	1000	Intergenic	Intergenic	360986	NM_001081246	66605	Mm.72646	NM_001081246	ENSMUSG00000056912	1700017N19Rik	RIKEN cDNA 1700017N19 gene	protein-coding
chr13-2840	chr13	31597976	31602776	+	40.1	4800	Intergenic	Intergenic	-17863	NR_029439	71307	Mm.376184	NR_029439	ENSMUSG00000038408	1700018A04Rik	RIKEN cDNA 1700018A04 gene	ncRNA
chr13-6904	chr13	31591304	31592813	+	12.8	1509	Intergenic	Charlie1|DNA|hAT-Charlie	-9545	NR_029439	71307	Mm.376184	NR_029439	ENSMUSG00000038408	1700018A04Rik	RIKEN cDNA 1700018A04 gene	ncRNA
chr13-7985	chr13	31580491	31582008	+	12.6	1517	intron (NR_029439, intron 1 of 5)	L3|LINE|CR1	1264	NR_029439	71307	Mm.376184	NR_029439	ENSMUSG00000038408	1700018A04Rik	RIKEN cDNA 1700018A04 gene	ncRNA
chr8-8896	chr8	121480742	121482603	+	15.2	1861	Intergenic	Intergenic	60282	NM_029597	76405	Mm.165697	NM_029597	ENSMUSG00000031809	1700018B08Rik	RIKEN cDNA 1700018B08 gene	protein-coding
chr8-6218	chr8	121426788	121428185	+	11	1397	Intergenic	Lx8|LINE|L1	114468	NM_029597	76405	Mm.165697	NM_029597	ENSMUSG00000031809	1700018B08Rik	RIKEN cDNA 1700018B08 gene	protein-coding
chr8-2537	chr8	121431359	121432359	+	9.52	1000	Intergenic	Intergenic	110095	NM_029597	76405	Mm.165697	NM_029597	ENSMUSG00000031809	1700018B08Rik	RIKEN cDNA 1700018B08 gene	protein-coding
chr8-6219	chr8	121506970	121507970	+	8.6	1000	Intergenic	Intergenic	34484	NM_029597	76405	Mm.165697	NM_029597	ENSMUSG00000031809	1700018B08Rik	RIKEN cDNA 1700018B08 gene	protein-coding
chr8-8895	chr8	121338174	121339174	+	8.05	1000	Intergenic	Intergenic	203280	NM_029597	76405	Mm.165697	NM_029597	ENSMUSG00000031809	1700018B08Rik	RIKEN cDNA 1700018B08 gene	protein-coding
chr3-5011	chr3	49166139	49174417	+	68.5	8278	Intergenic	(TAGA)n|Simple_repeat|Simple_repeat	-561178	NR_003617	66332	Mm.46124	NM_025493		1700018B24Rik	enhancer of rudimentary homolog pseudogene	pseudo
chr3-8563	chr3	48936460	48944943	+	64.1	8483	Intergenic	RLTR10D2|LTR|ERVK	-331601	NR_003617	66332	Mm.46124	NM_025493		1700018B24Rik	enhancer of rudimentary homolog pseudogene	pseudo
chr3-14384	chr3	48903267	48909145	+	43.2	5878	Intergenic	(TTTG)n|Simple_repeat|Simple_repeat	-297106	NR_003617	66332	Mm.46124	NM_025493		1700018B24Rik	enhancer of rudimentary homolog pseudogene	pseudo
chr3-12134	chr3	48923514	48927710	+	30.8	4196	Intergenic	Intergenic	-316512	NR_003617	66332	Mm.46124	NM_025493		1700018B24Rik	enhancer of rudimentary homolog pseudogene	pseudo
chr3-14388	chr3	48947010	48950994	+	30.6	3984	Intergenic	Lx2|LINE|L1	-339902	NR_003617	66332	Mm.46124	NM_025493		1700018B24Rik	enhancer of rudimentary homolog pseudogene	pseudo
chr3-6007	chr3	48842659	48846320	+	28.4	3661	Intergenic	Intergenic	-235389	NR_003617	66332	Mm.46124	NM_025493		1700018B24Rik	enhancer of rudimentary homolog pseudogene	pseudo
chr3-12137	chr3	49147241	49150663	+	27.8	3422	Intergenic	Intergenic	-539852	NR_003617	66332	Mm.46124	NM_025493		1700018B24Rik	enhancer of rudimentary homolog pseudogene	pseudo
chr3-10163	chr3	48363764	48367253	+	26.2	3489	Intergenic	L1_Mur1|LINE|L1	243592	NR_003617	66332	Mm.46124	NM_025493		1700018B24Rik	enhancer of rudimentary homolog pseudogene	pseudo
chr3-5010	chr3	49155783	49158948	+	24.5	3165	Intergenic	L1_Mus2|LINE|L1	-548265	NR_003617	66332	Mm.46124	NM_025493		1700018B24Rik	enhancer of rudimentary homolog pseudogene	pseudo
chr3-14393	chr3	49134955	49138401	+	24	3446	Intergenic	ERVB4_1B-I_MM-int|LTR|ERVK	-527578	NR_003617	66332	Mm.46124	NM_025493		1700018B24Rik	enhancer of rudimentary homolog pseudogene	pseudo
chr3-10166	chr3	48669482	48672276	+	23.4	2794	Intergenic	Intergenic	-61779	NR_003617	66332	Mm.46124	NM_025493		1700018B24Rik	enhancer of rudimentary homolog pseudogene	pseudo
chr3-12130	chr3	48877774	48880092	+	21	2318	Intergenic	L1_Mus3|LINE|L1	-269833	NR_003617	66332	Mm.46124	NM_025493		1700018B24Rik	enhancer of rudimentary homolog pseudogene	pseudo
chr3-6008	chr3	48899148	48901303	+	17.8	2155	Intergenic	Intergenic	-291125	NR_003617	66332	Mm.46124	NM_025493		1700018B24Rik	enhancer of rudimentary homolog pseudogene	pseudo
chr3-14375	chr3	48463265	48465048	+	14.5	1783	Intergenic	L1Md_T|LINE|L1	144944	NR_003617	66332	Mm.46124	NM_025493		1700018B24Rik	enhancer of rudimentary homolog pseudogene	pseudo
chr3-5002	chr3	48451817	48453502	+	14.5	1685	Intergenic	Intergenic	156441	NR_003617	66332	Mm.46124	NM_025493		1700018B24Rik	enhancer of rudimentary homolog pseudogene	pseudo
chr3-10167	chr3	48838515	48840238	+	13.2	1723	Intergenic	Intergenic	-230276	NR_003617	66332	Mm.46124	NM_025493		1700018B24Rik	enhancer of rudimentary homolog pseudogene	pseudo
chr3-8558	chr3	48892229	48893607	+	13	1378	Intergenic	Intergenic	-283818	NR_003617	66332	Mm.46124	NM_025493		1700018B24Rik	enhancer of rudimentary homolog pseudogene	pseudo
chr3-10172	chr3	49006988	49008566	+	12.6	1578	Intergenic	Intergenic	-398677	NR_003617	66332	Mm.46124	NM_025493		1700018B24Rik	enhancer of rudimentary homolog pseudogene	pseudo
chr3-6006	chr3	48743760	48745342	+	12.3	1582	Intergenic	Lx3_Mus|LINE|L1	-135451	NR_003617	66332	Mm.46124	NM_025493		1700018B24Rik	enhancer of rudimentary homolog pseudogene	pseudo
chr3-6009	chr3	49128569	49129970	+	11.5	1401	Intergenic	B1_Mus2|SINE|Alu	-520169	NR_003617	66332	Mm.46124	NM_025493		1700018B24Rik	enhancer of rudimentary homolog pseudogene	pseudo
chr3-14391	chr3	48972509	48973783	+	11.3	1274	Intergenic	ORR1C2|LTR|ERVL-MaLR	-364046	NR_003617	66332	Mm.46124	NM_025493		1700018B24Rik	enhancer of rudimentary homolog pseudogene	pseudo
chr3-8569	chr3	49152902	49154213	+	10.6	1311	Intergenic	Intergenic	-544457	NR_003617	66332	Mm.46124	NM_025493		1700018B24Rik	enhancer of rudimentary homolog pseudogene	pseudo
chr3-14382	chr3	48887075	48888438	+	10.3	1363	Intergenic	Intergenic	-278656	NR_003617	66332	Mm.46124	NM_025493		1700018B24Rik	enhancer of rudimentary homolog pseudogene	pseudo
chr3-12126	chr3	48634829	48636081	+	9.7	1252	Intergenic	Lx3_Mus|LINE|L1	-26355	NR_003617	66332	Mm.46124	NM_025493		1700018B24Rik	enhancer of rudimentary homolog pseudogene	pseudo
chr3-4188	chr3	49144509	49145509	+	9.15	1000	Intergenic	Intergenic	-535909	NR_003617	66332	Mm.46124	NM_025493		1700018B24Rik	enhancer of rudimentary homolog pseudogene	pseudo
chr3-8557	chr3	48813996	48814996	+	8.79	1000	Intergenic	B1_Mus1|SINE|Alu	-205396	NR_003617	66332	Mm.46124	NM_025493		1700018B24Rik	enhancer of rudimentary homolog pseudogene	pseudo
chr3-7188	chr3	48955965	48956965	+	8.6	1000	Intergenic	Intergenic	-347365	NR_003617	66332	Mm.46124	NM_025493		1700018B24Rik	enhancer of rudimentary homolog pseudogene	pseudo
chr3-8561	chr3	48919276	48920276	+	8.6	1000	Intergenic	L1_Mus3|LINE|L1	-310676	NR_003617	66332	Mm.46124	NM_025493		1700018B24Rik	enhancer of rudimentary homolog pseudogene	pseudo
chr3-10165	chr3	48589475	48590475	+	8.42	1000	Intergenic	Intergenic	19125	NR_003617	66332	Mm.46124	NM_025493		1700018B24Rik	enhancer of rudimentary homolog pseudogene	pseudo
chr3-7185	chr3	48347496	48348496	+	8.42	1000	Intergenic	L1Md_F2|LINE|L1	261104	NR_003617	66332	Mm.46124	NM_025493		1700018B24Rik	enhancer of rudimentary homolog pseudogene	pseudo
chr3-12129	chr3	48868475	48869475	+	8.24	1000	Intergenic	Intergenic	-259875	NR_003617	66332	Mm.46124	NM_025493		1700018B24Rik	enhancer of rudimentary homolog pseudogene	pseudo
chr3-14378	chr3	48551399	48552399	+	8.24	1000	Intergenic	L1MA8|LINE|L1	57201	NR_003617	66332	Mm.46124	NM_025493		1700018B24Rik	enhancer of rudimentary homolog pseudogene	pseudo
chr3-10164	chr3	48534196	48535196	+	8.24	1000	Intergenic	Lx5|LINE|L1	74404	NR_003617	66332	Mm.46124	NM_025493		1700018B24Rik	enhancer of rudimentary homolog pseudogene	pseudo
chr3-12136	chr3	49043832	49044832	+	8.24	1000	Intergenic	Intergenic	-435232	NR_003617	66332	Mm.46124	NM_025493		1700018B24Rik	enhancer of rudimentary homolog pseudogene	pseudo
chr3-12124	chr3	48592094	48593094	+	8.24	1000	Intergenic	MTEa-int|LTR|ERVL-MaLR	16506	NR_003617	66332	Mm.46124	NM_025493		1700018B24Rik	enhancer of rudimentary homolog pseudogene	pseudo
chr3-14377	chr3	48524135	48525135	+	8.05	1000	Intergenic	Intergenic	84465	NR_003617	66332	Mm.46124	NM_025493		1700018B24Rik	enhancer of rudimentary homolog pseudogene	pseudo
chr3-12127	chr3	48732668	48733668	+	8.05	1000	Intergenic	Intergenic	-124068	NR_003617	66332	Mm.46124	NM_025493		1700018B24Rik	enhancer of rudimentary homolog pseudogene	pseudo
chr3-14380	chr3	48781028	48782028	+	8.05	1000	Intergenic	Intergenic	-172428	NR_003617	66332	Mm.46124	NM_025493		1700018B24Rik	enhancer of rudimentary homolog pseudogene	pseudo
chr3-14390	chr3	48962639	48963639	+	7.87	1000	Intergenic	Intergenic	-354039	NR_003617	66332	Mm.46124	NM_025493		1700018B24Rik	enhancer of rudimentary homolog pseudogene	pseudo
chr3-12125	chr3	48623024	48624024	+	7.87	1000	Intergenic	Lx9|LINE|L1	-14424	NR_003617	66332	Mm.46124	NM_025493		1700018B24Rik	enhancer of rudimentary homolog pseudogene	pseudo
chr3-14376	chr3	48486198	48487198	+	7.5	1000	Intergenic	RLTR1C|LTR|ERV1	122402	NR_003617	66332	Mm.46124	NM_025493		1700018B24Rik	enhancer of rudimentary homolog pseudogene	pseudo
chr4-8897	chr4	63652484	63653484	+	8.42	1000	Intergenic	Intergenic	-30555	NM_029324	75524	Mm.38543	NM_029324	ENSMUSG00000058935	1700018C11Rik	RIKEN cDNA 1700018C11 gene	protein-coding
chr5-18688	chr5	145045467	145046467	+	7.87	1000	TTS (NM_027069)	TTS (NM_027069)	2977	NM_027069	69396	Mm.45463	NM_027069	ENSMUSG00000029620	1700018F24Rik	RIKEN cDNA 1700018F24 gene	protein-coding
chr1-14772	chr1	52988425	52992035	+	26.4	3610	Intergenic	Intergenic	-37390	NM_144953	67080	Mm.236287	NM_144953	ENSMUSG00000043629	1700019D03Rik	RIKEN cDNA 1700019D03 gene	protein-coding
chr2-11705	chr2	46806539	46815691	+	68.1	9152	Intergenic	MurERV4-int|LTR|ERVK	1114510	NR_040497	69405	Mm.396184	NR_040497	ENSMUSG00000086202	1700019E08Rik	RIKEN cDNA 1700019E08 gene	ncRNA
chr2-2281	chr2	46777795	46784951	+	52	7156	Intergenic	RMER6C|LTR|ERVK	1084768	NR_040497	69405	Mm.396184	NR_040497	ENSMUSG00000086202	1700019E08Rik	RIKEN cDNA 1700019E08 gene	ncRNA
chr2-11696	chr2	46410156	46415579	+	40.6	5423	Intergenic	L1VL4|LINE|L1	716262	NR_040497	69405	Mm.396184	NR_040497	ENSMUSG00000086202	1700019E08Rik	RIKEN cDNA 1700019E08 gene	ncRNA
chr2-10000	chr2	46453122	46457259	+	31.5	4137	Intergenic	L1_Mus2|LINE|L1	758585	NR_040497	69405	Mm.396184	NR_040497	ENSMUSG00000086202	1700019E08Rik	RIKEN cDNA 1700019E08 gene	ncRNA
chr2-2682	chr2	46390718	46393540	+	22.1	2822	Intergenic	Intergenic	695524	NR_040497	69405	Mm.396184	NR_040497	ENSMUSG00000086202	1700019E08Rik	RIKEN cDNA 1700019E08 gene	ncRNA
chr2-11690	chr2	45677216	45679975	+	21.2	2759	Intergenic	Intergenic	-18010	NR_040497	69405	Mm.396184	NR_040497	ENSMUSG00000086202	1700019E08Rik	RIKEN cDNA 1700019E08 gene	ncRNA
chr2-8581	chr2	47144457	47146595	+	20.3	2138	Intergenic	L1_Mus1|LINE|L1	1448921	NR_040497	69405	Mm.396184	NR_040497	ENSMUSG00000086202	1700019E08Rik	RIKEN cDNA 1700019E08 gene	ncRNA
chr2-3795	chr2	47002200	47004498	+	20	2298	Intergenic	RLTR6-int|LTR|ERV1	1306744	NR_040497	69405	Mm.396184	NR_040497	ENSMUSG00000086202	1700019E08Rik	RIKEN cDNA 1700019E08 gene	ncRNA
chr2-8567	chr2	46375034	46377546	+	19.6	2512	Intergenic	L1M3c|LINE|L1	679685	NR_040497	69405	Mm.396184	NR_040497	ENSMUSG00000086202	1700019E08Rik	RIKEN cDNA 1700019E08 gene	ncRNA
chr2-6187	chr2	46580040	46582495	+	18.9	2455	Intergenic	Intergenic	884662	NR_040497	69405	Mm.396184	NR_040497	ENSMUSG00000086202	1700019E08Rik	RIKEN cDNA 1700019E08 gene	ncRNA
chr2-8572	chr2	46597539	46599737	+	17.8	2198	Intergenic	Intergenic	902033	NR_040497	69405	Mm.396184	NR_040497	ENSMUSG00000086202	1700019E08Rik	RIKEN cDNA 1700019E08 gene	ncRNA
chr2-10010	chr2	46994144	46996130	+	16.5	1986	Intergenic	Intergenic	1298532	NR_040497	69405	Mm.396184	NR_040497	ENSMUSG00000086202	1700019E08Rik	RIKEN cDNA 1700019E08 gene	ncRNA
chr2-7287	chr2	46841693	46843534	+	15.7	1841	Intergenic	Lx6|LINE|L1	1146008	NR_040497	69405	Mm.396184	NR_040497	ENSMUSG00000086202	1700019E08Rik	RIKEN cDNA 1700019E08 gene	ncRNA
chr2-7289	chr2	46987272	46989047	+	13.9	1775	Intergenic	RMER20A|LTR|ERVK	1291554	NR_040497	69405	Mm.396184	NR_040497	ENSMUSG00000086202	1700019E08Rik	RIKEN cDNA 1700019E08 gene	ncRNA
chr2-8578	chr2	46863806	46865270	+	11.5	1464	Intergenic	RMER20B|LTR|ERVK	1167933	NR_040497	69405	Mm.396184	NR_040497	ENSMUSG00000086202	1700019E08Rik	RIKEN cDNA 1700019E08 gene	ncRNA
chr2-4449	chr2	46679962	46681217	+	11.3	1255	Intergenic	Intergenic	983984	NR_040497	69405	Mm.396184	NR_040497	ENSMUSG00000086202	1700019E08Rik	RIKEN cDNA 1700019E08 gene	ncRNA
chr2-5216	chr2	47138786	47140184	+	11.2	1398	Intergenic	ORR1E|LTR|ERVL-MaLR	1442880	NR_040497	69405	Mm.396184	NR_040497	ENSMUSG00000086202	1700019E08Rik	RIKEN cDNA 1700019E08 gene	ncRNA
chr2-11689	chr2	45531913	45533246	+	10.8	1333	Intergenic	Intergenic	-164026	NR_040497	69405	Mm.396184	NR_040497	ENSMUSG00000086202	1700019E08Rik	RIKEN cDNA 1700019E08 gene	ncRNA
chr2-8566	chr2	46282780	46284157	+	10.8	1377	Intergenic	Intergenic	586863	NR_040497	69405	Mm.396184	NR_040497	ENSMUSG00000086202	1700019E08Rik	RIKEN cDNA 1700019E08 gene	ncRNA
chr2-5213	chr2	46649153	46650443	+	10.4	1290	Intergenic	L1VL4|LINE|L1	953193	NR_040497	69405	Mm.396184	NR_040497	ENSMUSG00000086202	1700019E08Rik	RIKEN cDNA 1700019E08 gene	ncRNA
chr2-7291	chr2	47023601	47024882	+	9.88	1281	Intergenic	Intergenic	1327636	NR_040497	69405	Mm.396184	NR_040497	ENSMUSG00000086202	1700019E08Rik	RIKEN cDNA 1700019E08 gene	ncRNA
chr2-2681	chr2	45941416	45942416	+	9.88	1000	Intergenic	Intergenic	245311	NR_040497	69405	Mm.396184	NR_040497	ENSMUSG00000086202	1700019E08Rik	RIKEN cDNA 1700019E08 gene	ncRNA
chr2-5211	chr2	46400232	46401232	+	9.15	1000	Intergenic	Intergenic	704127	NR_040497	69405	Mm.396184	NR_040497	ENSMUSG00000086202	1700019E08Rik	RIKEN cDNA 1700019E08 gene	ncRNA
chr2-6185	chr2	45647017	45648017	+	8.97	1000	Intergenic	Intergenic	-49088	NR_040497	69405	Mm.396184	NR_040497	ENSMUSG00000086202	1700019E08Rik	RIKEN cDNA 1700019E08 gene	ncRNA
chr2-5210	chr2	45434484	45435484	+	8.79	1000	Intergenic	Intergenic	-261621	NR_040497	69405	Mm.396184	NR_040497	ENSMUSG00000086202	1700019E08Rik	RIKEN cDNA 1700019E08 gene	ncRNA
chr2-8565	chr2	45684980	45685980	+	8.6	1000	Intergenic	Intergenic	-11125	NR_040497	69405	Mm.396184	NR_040497	ENSMUSG00000086202	1700019E08Rik	RIKEN cDNA 1700019E08 gene	ncRNA
chr2-8571	chr2	46484090	46485090	+	8.6	1000	Intergenic	Lx2|LINE|L1	787985	NR_040497	69405	Mm.396184	NR_040497	ENSMUSG00000086202	1700019E08Rik	RIKEN cDNA 1700019E08 gene	ncRNA
chr2-8583	chr2	47164919	47165919	+	8.6	1000	Intergenic	RMER1C|Other|Other	1468814	NR_040497	69405	Mm.396184	NR_040497	ENSMUSG00000086202	1700019E08Rik	RIKEN cDNA 1700019E08 gene	ncRNA
chr2-9996	chr2	45612604	45613604	+	8.42	1000	Intergenic	Intergenic	-83501	NR_040497	69405	Mm.396184	NR_040497	ENSMUSG00000086202	1700019E08Rik	RIKEN cDNA 1700019E08 gene	ncRNA
chr2-7290	chr2	47016275	47017275	+	8.42	1000	Intergenic	MTE2b-int|LTR|ERVL-MaLR	1320170	NR_040497	69405	Mm.396184	NR_040497	ENSMUSG00000086202	1700019E08Rik	RIKEN cDNA 1700019E08 gene	ncRNA
chr2-10002	chr2	46739286	46740286	+	8.24	1000	Intergenic	Intergenic	1043181	NR_040497	69405	Mm.396184	NR_040497	ENSMUSG00000086202	1700019E08Rik	RIKEN cDNA 1700019E08 gene	ncRNA
chr2-11695	chr2	46364077	46365077	+	8.24	1000	Intergenic	Intergenic	667972	NR_040497	69405	Mm.396184	NR_040497	ENSMUSG00000086202	1700019E08Rik	RIKEN cDNA 1700019E08 gene	ncRNA
chr2-7278	chr2	46261502	46262502	+	8.24	1000	Intergenic	Plat_L3|LINE|CR1	565397	NR_040497	69405	Mm.396184	NR_040497	ENSMUSG00000086202	1700019E08Rik	RIKEN cDNA 1700019E08 gene	ncRNA
chr2-11694	chr2	46171905	46172905	+	8.24	1000	Intergenic	Intergenic	475800	NR_040497	69405	Mm.396184	NR_040497	ENSMUSG00000086202	1700019E08Rik	RIKEN cDNA 1700019E08 gene	ncRNA
chr2-11707	chr2	46852641	46853641	+	8.24	1000	Intergenic	Lx8b|LINE|L1	1156536	NR_040497	69405	Mm.396184	NR_040497	ENSMUSG00000086202	1700019E08Rik	RIKEN cDNA 1700019E08 gene	ncRNA
chr2-11693	chr2	46096752	46097752	+	8.05	1000	Intergenic	Intergenic	400647	NR_040497	69405	Mm.396184	NR_040497	ENSMUSG00000086202	1700019E08Rik	RIKEN cDNA 1700019E08 gene	ncRNA
chr2-9995	chr2	45405805	45406805	+	8.05	1000	Intergenic	Intergenic	-290300	NR_040497	69405	Mm.396184	NR_040497	ENSMUSG00000086202	1700019E08Rik	RIKEN cDNA 1700019E08 gene	ncRNA
chr2-9997	chr2	45997834	45998834	+	8.05	1000	Intergenic	Intergenic	301729	NR_040497	69405	Mm.396184	NR_040497	ENSMUSG00000086202	1700019E08Rik	RIKEN cDNA 1700019E08 gene	ncRNA
chr2-8580	chr2	47046412	47047412	+	7.87	1000	Intergenic	Intergenic	1350307	NR_040497	69405	Mm.396184	NR_040497	ENSMUSG00000086202	1700019E08Rik	RIKEN cDNA 1700019E08 gene	ncRNA
chr2-11698	chr2	46421157	46422157	+	7.87	1000	Intergenic	Intergenic	725052	NR_040497	69405	Mm.396184	NR_040497	ENSMUSG00000086202	1700019E08Rik	RIKEN cDNA 1700019E08 gene	ncRNA
chr2-11692	chr2	45877794	45878794	+	7.69	1000	Intergenic	Intergenic	181689	NR_040497	69405	Mm.396184	NR_040497	ENSMUSG00000086202	1700019E08Rik	RIKEN cDNA 1700019E08 gene	ncRNA
chr2-11708	chr2	46971804	46972804	+	7.69	1000	Intergenic	L1_Mur2|LINE|L1	1275699	NR_040497	69405	Mm.396184	NR_040497	ENSMUSG00000086202	1700019E08Rik	RIKEN cDNA 1700019E08 gene	ncRNA
chr6-10762	chr6	85887118	85888118	+	8.05	1000	Intergenic	RMER16-int|LTR|ERVK	14915	NM_001145895	75541	Mm.24454	NM_029331	ENSMUSG00000068299	1700019G17Rik	RIKEN cDNA 1700019G17 gene	protein-coding
chr6-12675	chr6	85892733	85893733	+	7.87	1000	Intergenic	Intergenic	9300	NM_001145895	75541	Mm.24454	NM_029331	ENSMUSG00000068299	1700019G17Rik	RIKEN cDNA 1700019G17 gene	protein-coding
chr6-5738	chr6	5851020	5852020	+	8.42	1000	intron (NM_001191023, intron 5 of 15)	intron (NM_001191023, intron 5 of 15)	125873	NR_040255	72249	Mm.443268	NR_040255	ENSMUSG00000085416	1700019G24Rik	RIKEN cDNA 1700019G24 gene	ncRNA
chr12-4633	chr12	96030992	96040912	+	78.5	9920	Intergenic	Intergenic	11270	NR_103800	69423	Mm.46121	NM_027076	ENSMUSG00000059695	1700019M22Rik	NFX-like protein	pseudo
chr12-3882	chr12	96338355	96345926	+	54.7	7571	Intergenic	Intergenic	-294918	NR_103800	69423	Mm.46121	NM_027076	ENSMUSG00000059695	1700019M22Rik	NFX-like protein	pseudo
chr12-4630	chr12	95993410	96000263	+	50.5	6853	Intergenic	Intergenic	50386	NR_103800	69423	Mm.46121	NM_027076	ENSMUSG00000059695	1700019M22Rik	NFX-like protein	pseudo
chr12-5532	chr12	95950600	95957300	+	46.3	6700	Intergenic	Intergenic	93272	NR_103800	69423	Mm.46121	NM_027076	ENSMUSG00000059695	1700019M22Rik	NFX-like protein	pseudo
chr12-5572	chr12	96940297	96945411	+	41	5114	Intergenic	Intergenic	-895632	NR_103800	69423	Mm.46121	NM_027076	ENSMUSG00000059695	1700019M22Rik	NFX-like protein	pseudo
chr12-2688	chr12	96642550	96647642	+	39.2	5092	Intergenic	Lx5|LINE|L1	-597874	NR_103800	69423	Mm.46121	NM_027076	ENSMUSG00000059695	1700019M22Rik	NFX-like protein	pseudo
chr12-1873	chr12	96047789	96052445	+	35.1	4656	Intergenic	Intergenic	-2895	NR_103800	69423	Mm.46121	NM_027076	ENSMUSG00000059695	1700019M22Rik	NFX-like protein	pseudo
chr12-6658	chr12	96854012	96858443	+	34.8	4431	Intergenic	Intergenic	-809005	NR_103800	69423	Mm.46121	NM_027076	ENSMUSG00000059695	1700019M22Rik	NFX-like protein	pseudo
chr12-3880	chr12	96252635	96256610	+	30.9	3975	Intergenic	ERVB4_1B-LTR_MM|LTR|ERVK	-207400	NR_103800	69423	Mm.46121	NM_027076	ENSMUSG00000059695	1700019M22Rik	NFX-like protein	pseudo
chr12-5543	chr12	96215539	96219681	+	30.6	4142	Intergenic	Intergenic	-170388	NR_103800	69423	Mm.46121	NM_027076	ENSMUSG00000059695	1700019M22Rik	NFX-like protein	pseudo
chr12-971	chr12	96226231	96229494	+	28.7	3263	Intergenic	Intergenic	-180640	NR_103800	69423	Mm.46121	NM_027076	ENSMUSG00000059695	1700019M22Rik	NFX-like protein	pseudo
chr12-3200	chr12	95897200	95901117	+	27.5	3917	Intergenic	Intergenic	148064	NR_103800	69423	Mm.46121	NM_027076	ENSMUSG00000059695	1700019M22Rik	NFX-like protein	pseudo
chr12-5546	chr12	96274586	96278226	+	27.3	3640	Intergenic	Intergenic	-229184	NR_103800	69423	Mm.46121	NM_027076	ENSMUSG00000059695	1700019M22Rik	NFX-like protein	pseudo
chr12-4637	chr12	96261997	96265434	+	26.5	3437	Intergenic	Intergenic	-216493	NR_103800	69423	Mm.46121	NM_027076	ENSMUSG00000059695	1700019M22Rik	NFX-like protein	pseudo
chr12-591	chr12	95883441	95886565	+	25.8	3124	Intergenic	L1VL4|LINE|L1	162219	NR_103800	69423	Mm.46121	NM_027076	ENSMUSG00000059695	1700019M22Rik	NFX-like protein	pseudo
chr12-6638	chr12	96375984	96379368	+	25.4	3384	Intergenic	L1_Mus2|LINE|L1	-330454	NR_103800	69423	Mm.46121	NM_027076	ENSMUSG00000059695	1700019M22Rik	NFX-like protein	pseudo
chr12-6652	chr12	96714421	96717986	+	25.4	3565	Intergenic	Intergenic	-668981	NR_103800	69423	Mm.46121	NM_027076	ENSMUSG00000059695	1700019M22Rik	NFX-like protein	pseudo
chr12-2238	chr12	96499475	96502750	+	25.3	3275	Intergenic	L1_Mus3|LINE|L1	-453890	NR_103800	69423	Mm.46121	NM_027076	ENSMUSG00000059695	1700019M22Rik	NFX-like protein	pseudo
chr12-3217	chr12	96893325	96896603	+	25.1	3278	Intergenic	L1VL4|LINE|L1	-847742	NR_103800	69423	Mm.46121	NM_027076	ENSMUSG00000059695	1700019M22Rik	NFX-like protein	pseudo
chr12-4643	chr12	96566852	96570012	+	25.1	3160	Intergenic	Intergenic	-521210	NR_103800	69423	Mm.46121	NM_027076	ENSMUSG00000059695	1700019M22Rik	NFX-like protein	pseudo
chr12-4652	chr12	96705346	96708536	+	24.9	3190	Intergenic	Intergenic	-659719	NR_103800	69423	Mm.46121	NM_027076	ENSMUSG00000059695	1700019M22Rik	NFX-like protein	pseudo
chr12-5569	chr12	96799036	96802085	+	23.8	3049	Intergenic	Lx3A|LINE|L1	-753338	NR_103800	69423	Mm.46121	NM_027076	ENSMUSG00000059695	1700019M22Rik	NFX-like protein	pseudo
chr12-1584	chr12	96025232	96028228	+	23.1	2996	Intergenic	Lx2B|LINE|L1	20492	NR_103800	69423	Mm.46121	NM_027076	ENSMUSG00000059695	1700019M22Rik	NFX-like protein	pseudo
chr12-3886	chr12	96520955	96524032	+	22.9	3077	Intergenic	Lx6|LINE|L1	-475271	NR_103800	69423	Mm.46121	NM_027076	ENSMUSG00000059695	1700019M22Rik	NFX-like protein	pseudo
chr12-2695	chr12	96913412	96916175	+	22.9	2763	Intergenic	Intergenic	-867571	NR_103800	69423	Mm.46121	NM_027076	ENSMUSG00000059695	1700019M22Rik	NFX-like protein	pseudo
chr12-6615	chr12	95871715	95874545	+	22.1	2830	Intergenic	ERVB3_1-LTR_MM|LTR|ERVK	174092	NR_103800	69423	Mm.46121	NM_027076	ENSMUSG00000059695	1700019M22Rik	NFX-like protein	pseudo
chr12-6627	chr12	96054374	96057461	+	22	3087	Intergenic	L1_Mus1|LINE|L1	-8695	NR_103800	69423	Mm.46121	NM_027076	ENSMUSG00000059695	1700019M22Rik	NFX-like protein	pseudo
chr12-2690	chr12	96674637	96677564	+	22	2927	Intergenic	Lx5b|LINE|L1	-628878	NR_103800	69423	Mm.46121	NM_027076	ENSMUSG00000059695	1700019M22Rik	NFX-like protein	pseudo
chr12-6632	chr12	96235636	96238321	+	22	2685	Intergenic	Intergenic	-189756	NR_103800	69423	Mm.46121	NM_027076	ENSMUSG00000059695	1700019M22Rik	NFX-like protein	pseudo
chr12-6617	chr12	95917852	95920654	+	21.6	2802	Intergenic	Lx5|LINE|L1	127969	NR_103800	69423	Mm.46121	NM_027076	ENSMUSG00000059695	1700019M22Rik	NFX-like protein	pseudo
chr12-4655	chr12	96790022	96792516	+	18.9	2494	Intergenic	Intergenic	-744047	NR_103800	69423	Mm.46121	NM_027076	ENSMUSG00000059695	1700019M22Rik	NFX-like protein	pseudo
chr12-4646	chr12	96625193	96627541	+	18.5	2348	Intergenic	L1_Mur1|LINE|L1	-579145	NR_103800	69423	Mm.46121	NM_027076	ENSMUSG00000059695	1700019M22Rik	NFX-like protein	pseudo
chr12-1585	chr12	96085687	96087653	+	17.8	1966	Intergenic	Intergenic	-39448	NR_103800	69423	Mm.46121	NM_027076	ENSMUSG00000059695	1700019M22Rik	NFX-like protein	pseudo
chr12-1583	chr12	95923892	95925992	+	17.8	2100	Intergenic	Intergenic	122280	NR_103800	69423	Mm.46121	NM_027076	ENSMUSG00000059695	1700019M22Rik	NFX-like protein	pseudo
chr12-4660	chr12	96969356	96971156	+	15.2	1800	Intergenic	Lx4A|LINE|L1	-923034	NR_103800	69423	Mm.46121	NM_027076	ENSMUSG00000059695	1700019M22Rik	NFX-like protein	pseudo
chr12-3874	chr12	95967198	95968999	+	14.1	1801	Intergenic	Intergenic	79124	NR_103800	69423	Mm.46121	NM_027076	ENSMUSG00000059695	1700019M22Rik	NFX-like protein	pseudo
chr12-6637	chr12	96284995	96286661	+	13.9	1666	Intergenic	L1_Mus3|LINE|L1	-238606	NR_103800	69423	Mm.46121	NM_027076	ENSMUSG00000059695	1700019M22Rik	NFX-like protein	pseudo
chr12-1592	chr12	96428201	96429879	+	13.7	1678	Intergenic	B3|SINE|B2	-381818	NR_103800	69423	Mm.46121	NM_027076	ENSMUSG00000059695	1700019M22Rik	NFX-like protein	pseudo
chr12-3212	chr12	96653979	96655464	+	13.4	1485	Intergenic	Intergenic	-607499	NR_103800	69423	Mm.46121	NM_027076	ENSMUSG00000059695	1700019M22Rik	NFX-like protein	pseudo
chr12-6664	chr12	96973157	96974774	+	13.2	1617	Intergenic	Lx|LINE|L1	-926743	NR_103800	69423	Mm.46121	NM_027076	ENSMUSG00000059695	1700019M22Rik	NFX-like protein	pseudo
chr12-5574	chr12	96951560	96953330	+	13	1770	Intergenic	Intergenic	-905223	NR_103800	69423	Mm.46121	NM_027076	ENSMUSG00000059695	1700019M22Rik	NFX-like protein	pseudo
chr12-2240	chr12	96635505	96637120	+	13	1615	Intergenic	Intergenic	-589090	NR_103800	69423	Mm.46121	NM_027076	ENSMUSG00000059695	1700019M22Rik	NFX-like protein	pseudo
chr12-3215	chr12	96753641	96755237	+	12.8	1596	Intergenic	Intergenic	-707217	NR_103800	69423	Mm.46121	NM_027076	ENSMUSG00000059695	1700019M22Rik	NFX-like protein	pseudo
chr12-3223	chr12	97005408	97006977	+	12.6	1569	Intergenic	B1_Mur4|SINE|Alu	-958970	NR_103800	69423	Mm.46121	NM_027076	ENSMUSG00000059695	1700019M22Rik	NFX-like protein	pseudo
chr12-5564	chr12	96710196	96711803	+	12.6	1607	Intergenic	B4A|SINE|B4	-663777	NR_103800	69423	Mm.46121	NM_027076	ENSMUSG00000059695	1700019M22Rik	NFX-like protein	pseudo
chr12-2239	chr12	96526894	96528164	+	12.1	1270	Intergenic	Intergenic	-480307	NR_103800	69423	Mm.46121	NM_027076	ENSMUSG00000059695	1700019M22Rik	NFX-like protein	pseudo
chr12-3213	chr12	96680434	96681818	+	11.7	1384	Intergenic	Lx5b|LINE|L1	-633904	NR_103800	69423	Mm.46121	NM_027076	ENSMUSG00000059695	1700019M22Rik	NFX-like protein	pseudo
chr12-4656	chr12	96900762	96902196	+	11.7	1434	Intergenic	Intergenic	-854257	NR_103800	69423	Mm.46121	NM_027076	ENSMUSG00000059695	1700019M22Rik	NFX-like protein	pseudo
chr12-3211	chr12	96387892	96389286	+	11.7	1394	Intergenic	Lx8|LINE|L1	-341367	NR_103800	69423	Mm.46121	NM_027076	ENSMUSG00000059695	1700019M22Rik	NFX-like protein	pseudo
chr12-3879	chr12	96153272	96154583	+	11.3	1311	Intergenic	Intergenic	-106705	NR_103800	69423	Mm.46121	NM_027076	ENSMUSG00000059695	1700019M22Rik	NFX-like protein	pseudo
chr12-6628	chr12	96074314	96075639	+	11.2	1325	Intergenic	Intergenic	-27754	NR_103800	69423	Mm.46121	NM_027076	ENSMUSG00000059695	1700019M22Rik	NFX-like protein	pseudo
chr12-1877	chr12	96692239	96693491	+	11	1252	Intergenic	B3A|SINE|B2	-645643	NR_103800	69423	Mm.46121	NM_027076	ENSMUSG00000059695	1700019M22Rik	NFX-like protein	pseudo
chr12-4645	chr12	96609890	96611248	+	11	1358	Intergenic	Lx5|LINE|L1	-563347	NR_103800	69423	Mm.46121	NM_027076	ENSMUSG00000059695	1700019M22Rik	NFX-like protein	pseudo
chr12-1876	chr12	96351797	96353093	+	10.8	1296	Intergenic	Lx|LINE|L1	-305223	NR_103800	69423	Mm.46121	NM_027076	ENSMUSG00000059695	1700019M22Rik	NFX-like protein	pseudo
chr12-1330	chr12	96935652	96936906	+	10.8	1254	Intergenic	Lx2B2|LINE|L1	-889057	NR_103800	69423	Mm.46121	NM_027076	ENSMUSG00000059695	1700019M22Rik	NFX-like protein	pseudo
chr12-5539	chr12	96044524	96045865	+	10.8	1341	Intergenic	ERVB4_1-I_MM-int|LTR|ERVK	2028	NR_103800	69423	Mm.46121	NM_027076	ENSMUSG00000059695	1700019M22Rik	NFX-like protein	pseudo
chr12-1878	chr12	96836485	96837751	+	10.6	1266	Intergenic	Intergenic	-789896	NR_103800	69423	Mm.46121	NM_027076	ENSMUSG00000059695	1700019M22Rik	NFX-like protein	pseudo
chr12-1590	chr12	96290849	96292109	+	10.4	1260	Intergenic	Tigger1|DNA|TcMar-Tigger	-244257	NR_103800	69423	Mm.46121	NM_027076	ENSMUSG00000059695	1700019M22Rik	NFX-like protein	pseudo
chr12-6642	chr12	96463308	96464591	+	10.3	1283	Intergenic	L1_Mur2|LINE|L1	-416727	NR_103800	69423	Mm.46121	NM_027076	ENSMUSG00000059695	1700019M22Rik	NFX-like protein	pseudo
chr12-6654	chr12	96763591	96764977	+	10.3	1386	Intergenic	Intergenic	-717062	NR_103800	69423	Mm.46121	NM_027076	ENSMUSG00000059695	1700019M22Rik	NFX-like protein	pseudo
chr12-3881	chr12	96271464	96272735	+	10.1	1271	Intergenic	Intergenic	-224877	NR_103800	69423	Mm.46121	NM_027076	ENSMUSG00000059695	1700019M22Rik	NFX-like protein	pseudo
chr12-2697	chr12	96964553	96965853	+	10.1	1300	Intergenic	Intergenic	-917981	NR_103800	69423	Mm.46121	NM_027076	ENSMUSG00000059695	1700019M22Rik	NFX-like protein	pseudo
chr12-6661	chr12	96918919	96920405	+	9.7	1486	Intergenic	L1_Mus2|LINE|L1	-872440	NR_103800	69423	Mm.46121	NM_027076	ENSMUSG00000059695	1700019M22Rik	NFX-like protein	pseudo
chr12-4642	chr12	96548715	96549981	+	9.7	1266	Intergenic	Intergenic	-502126	NR_103800	69423	Mm.46121	NM_027076	ENSMUSG00000059695	1700019M22Rik	NFX-like protein	pseudo
chr12-1591	chr12	96362723	96363723	+	9.52	1000	Intergenic	Intergenic	-316001	NR_103800	69423	Mm.46121	NM_027076	ENSMUSG00000059695	1700019M22Rik	NFX-like protein	pseudo
chr12-2237	chr12	96475722	96476722	+	9.33	1000	Intergenic	Intergenic	-429000	NR_103800	69423	Mm.46121	NM_027076	ENSMUSG00000059695	1700019M22Rik	NFX-like protein	pseudo
chr12-3220	chr12	96931769	96932769	+	8.97	1000	Intergenic	Intergenic	-885047	NR_103800	69423	Mm.46121	NM_027076	ENSMUSG00000059695	1700019M22Rik	NFX-like protein	pseudo
chr12-3214	chr12	96740460	96741460	+	8.97	1000	Intergenic	Intergenic	-693738	NR_103800	69423	Mm.46121	NM_027076	ENSMUSG00000059695	1700019M22Rik	NFX-like protein	pseudo
chr12-3890	chr12	97109680	97110680	+	8.6	1000	Intergenic	B2_Mm2|SINE|B2	-1062958	NR_103800	69423	Mm.46121	NM_027076	ENSMUSG00000059695	1700019M22Rik	NFX-like protein	pseudo
chr12-4662	chr12	97034134	97035134	+	8.6	1000	Intergenic	Lx5c|LINE|L1	-987412	NR_103800	69423	Mm.46121	NM_027076	ENSMUSG00000059695	1700019M22Rik	NFX-like protein	pseudo
chr12-4651	chr12	96695722	96696722	+	8.6	1000	Intergenic	Intergenic	-649000	NR_103800	69423	Mm.46121	NM_027076	ENSMUSG00000059695	1700019M22Rik	NFX-like protein	pseudo
chr12-5535	chr12	95959686	95960686	+	8.42	1000	Intergenic	Intergenic	87036	NR_103800	69423	Mm.46121	NM_027076	ENSMUSG00000059695	1700019M22Rik	NFX-like protein	pseudo
chr12-4624	chr12	95904946	95905946	+	8.42	1000	Intergenic	Intergenic	141776	NR_103800	69423	Mm.46121	NM_027076	ENSMUSG00000059695	1700019M22Rik	NFX-like protein	pseudo
chr12-4644	chr12	96578156	96579156	+	8.42	1000	Intergenic	RMER17C|LTR|ERVK	-531434	NR_103800	69423	Mm.46121	NM_027076	ENSMUSG00000059695	1700019M22Rik	NFX-like protein	pseudo
chr12-4638	chr12	96279963	96280963	+	8.42	1000	Intergenic	L1_Mus4|LINE|L1	-233241	NR_103800	69423	Mm.46121	NM_027076	ENSMUSG00000059695	1700019M22Rik	NFX-like protein	pseudo
chr12-3885	chr12	96431409	96432409	+	8.42	1000	Intergenic	L1_Mus3|LINE|L1	-384687	NR_103800	69423	Mm.46121	NM_027076	ENSMUSG00000059695	1700019M22Rik	NFX-like protein	pseudo
chr12-6630	chr12	96147820	96148820	+	8.24	1000	Intergenic	RMER13A1|LTR|ERVK	-101098	NR_103800	69423	Mm.46121	NM_027076	ENSMUSG00000059695	1700019M22Rik	NFX-like protein	pseudo
chr12-5531	chr12	95947908	95948908	+	8.24	1000	Intergenic	B1_Mus1|SINE|Alu	98814	NR_103800	69423	Mm.46121	NM_027076	ENSMUSG00000059695	1700019M22Rik	NFX-like protein	pseudo
chr12-5570	chr12	96816350	96817350	+	8.24	1000	Intergenic	L1_Mur3|LINE|L1	-769628	NR_103800	69423	Mm.46121	NM_027076	ENSMUSG00000059695	1700019M22Rik	NFX-like protein	pseudo
chr12-5529	chr12	95890198	95891198	+	8.24	1000	Intergenic	Intergenic	156524	NR_103800	69423	Mm.46121	NM_027076	ENSMUSG00000059695	1700019M22Rik	NFX-like protein	pseudo
chr12-6667	chr12	97022495	97023495	+	8.05	1000	Intergenic	Intergenic	-975773	NR_103800	69423	Mm.46121	NM_027076	ENSMUSG00000059695	1700019M22Rik	NFX-like protein	pseudo
chr12-6651	chr12	96698847	96699847	+	8.05	1000	Intergenic	Intergenic	-652125	NR_103800	69423	Mm.46121	NM_027076	ENSMUSG00000059695	1700019M22Rik	NFX-like protein	pseudo
chr12-6641	chr12	96405287	96406287	+	8.05	1000	Intergenic	Intergenic	-358565	NR_103800	69423	Mm.46121	NM_027076	ENSMUSG00000059695	1700019M22Rik	NFX-like protein	pseudo
chr12-6665	chr12	96978414	96979414	+	8.05	1000	Intergenic	Intergenic	-931692	NR_103800	69423	Mm.46121	NM_027076	ENSMUSG00000059695	1700019M22Rik	NFX-like protein	pseudo
chr12-4635	chr12	96090599	96091599	+	8.05	1000	Intergenic	Intergenic	-43877	NR_103800	69423	Mm.46121	NM_027076	ENSMUSG00000059695	1700019M22Rik	NFX-like protein	pseudo
chr12-5557	chr12	96487454	96488454	+	8.05	1000	Intergenic	Intergenic	-440732	NR_103800	69423	Mm.46121	NM_027076	ENSMUSG00000059695	1700019M22Rik	NFX-like protein	pseudo
chr12-5550	chr12	96305574	96306574	+	8.05	1000	Intergenic	Intergenic	-258852	NR_103800	69423	Mm.46121	NM_027076	ENSMUSG00000059695	1700019M22Rik	NFX-like protein	pseudo
chr12-5542	chr12	96115528	96116528	+	8.05	1000	Intergenic	Intergenic	-68806	NR_103800	69423	Mm.46121	NM_027076	ENSMUSG00000059695	1700019M22Rik	NFX-like protein	pseudo
chr12-6622	chr12	96022477	96023477	+	8.05	1000	Intergenic	L1_Mus3|LINE|L1	24245	NR_103800	69423	Mm.46121	NM_027076	ENSMUSG00000059695	1700019M22Rik	NFX-like protein	pseudo
chr12-6629	chr12	96096009	96097009	+	8.05	1000	Intergenic	Lx4B|LINE|L1	-49287	NR_103800	69423	Mm.46121	NM_027076	ENSMUSG00000059695	1700019M22Rik	NFX-like protein	pseudo
chr12-6621	chr12	96008802	96009802	+	8.05	1000	Intergenic	Intergenic	37920	NR_103800	69423	Mm.46121	NM_027076	ENSMUSG00000059695	1700019M22Rik	NFX-like protein	pseudo
chr12-6660	chr12	96908167	96909167	+	8.05	1000	Intergenic	Intergenic	-861445	NR_103800	69423	Mm.46121	NM_027076	ENSMUSG00000059695	1700019M22Rik	NFX-like protein	pseudo
chr12-6640	chr12	96383706	96384706	+	7.87	1000	Intergenic	Intergenic	-336984	NR_103800	69423	Mm.46121	NM_027076	ENSMUSG00000059695	1700019M22Rik	NFX-like protein	pseudo
chr12-6653	chr12	96726631	96727631	+	7.87	1000	Intergenic	Intergenic	-679909	NR_103800	69423	Mm.46121	NM_027076	ENSMUSG00000059695	1700019M22Rik	NFX-like protein	pseudo
chr12-5575	chr12	96993383	96994383	+	7.87	1000	Intergenic	Intergenic	-946661	NR_103800	69423	Mm.46121	NM_027076	ENSMUSG00000059695	1700019M22Rik	NFX-like protein	pseudo
chr12-6668	chr12	97057664	97058664	+	7.87	1000	Intergenic	L2|LINE|L2	-1010942	NR_103800	69423	Mm.46121	NM_027076	ENSMUSG00000059695	1700019M22Rik	NFX-like protein	pseudo
chr12-5549	chr12	96298360	96299360	+	7.87	1000	Intergenic	Intergenic	-251638	NR_103800	69423	Mm.46121	NM_027076	ENSMUSG00000059695	1700019M22Rik	NFX-like protein	pseudo
chr12-5576	chr12	97133309	97134309	+	7.87	1000	Intergenic	Intergenic	-1086587	NR_103800	69423	Mm.46121	NM_027076	ENSMUSG00000059695	1700019M22Rik	NFX-like protein	pseudo
chr12-6645	chr12	96602644	96603644	+	7.69	1000	Intergenic	MER126|DNA|DNA	-555922	NR_103800	69423	Mm.46121	NM_027076	ENSMUSG00000059695	1700019M22Rik	NFX-like protein	pseudo
chr12-6650	chr12	96685084	96686084	+	7.69	1000	Intergenic	Intergenic	-638362	NR_103800	69423	Mm.46121	NM_027076	ENSMUSG00000059695	1700019M22Rik	NFX-like protein	pseudo
chr12-6666	chr12	96997512	96998512	+	7.32	1000	Intergenic	Intergenic	-950790	NR_103800	69423	Mm.46121	NM_027076	ENSMUSG00000059695	1700019M22Rik	NFX-like protein	pseudo
chr19-2936	chr19	58798419	58800082	+	13.7	1663	3' UTR (NM_175199, exon 12 of 12)	3' UTR (NM_175199, exon 12 of 12)	-4836	NM_026208	67507	Mm.27027	NM_026208	ENSMUSG00000026931	1700019N19Rik	RIKEN cDNA 1700019N19 gene	protein-coding
chr1-14962	chr1	86408813	86410235	+	10.8	1422	Intergenic	Intergenic	-16805	NM_027966	71863	Mm.179627	NM_027966	ENSMUSG00000036574	1700019O17Rik	RIKEN cDNA 1700019O17 gene	protein-coding
chr11-8000	chr11	83434714	83436588	+	15.7	1874	Intergenic	Intergenic	-2043	NM_025492	66330	Mm.44800	NM_025492	ENSMUSG00000035085	1700020L24Rik	RIKEN cDNA 1700020L24 gene	protein-coding
chr11-5416	chr11	83441411	83442941	+	12.6	1530	TTS (NM_025492)	TTS (NM_025492)	4482	NM_025492	66330	Mm.44800	NM_025492	ENSMUSG00000035085	1700020L24Rik	RIKEN cDNA 1700020L24 gene	protein-coding
chr9-6749	chr9	120776107	120778106	+	17.6	1999	Intergenic	Intergenic	138144	NR_040742	76402	Mm.436588	NR_040742		1700020M21Rik	RIKEN cDNA 1700020M21 gene	ncRNA
chr9-4831	chr9	120893857	120894857	+	8.79	1000	Intergenic	MIR3|SINE|MIR	20893	NR_040742	76402	Mm.436588	NR_040742		1700020M21Rik	RIKEN cDNA 1700020M21 gene	ncRNA
chr10-7771	chr10	21630983	21631983	+	7.87	1000	Intergenic	Intergenic	38338	NR_027968	67692	Mm.54306	NM_183266		1700020N01Rik	RIKEN cDNA 1700020N01 gene	ncRNA
chr1-12714	chr1	91404530	91405530	+	7.87	1000	non-coding (NR_026924, exon 3 of 3)	non-coding (NR_026924, exon 3 of 3)	999	NR_026924	67086	Mm.396158	NR_026924		1700020N18Rik	RIKEN cDNA 1700020N18 gene	ncRNA
chr2-8086	chr2	173520123	173521636	+	12.4	1513	Intergenic	B4|SINE|B4	-1713	NM_028158	72221	Mm.46132	NM_028158	ENSMUSG00000027518	1700021F07Rik	RIKEN cDNA 1700021F07 gene	protein-coding
chr2-11115	chr2	173527592	173528592	+	7.69	1000	intron (NM_028158, intron 3 of 3)	intron (NM_028158, intron 3 of 3)	5500	NM_028158	72221	Mm.46132	NM_028158	ENSMUSG00000027518	1700021F07Rik	RIKEN cDNA 1700021F07 gene	protein-coding
chr15-1426	chr15	45791135	45798645	+	56.2	7510	Intergenic	LTR40a|LTR|ERVL	-529695	NR_045509	71120	Mm.158571	NR_045509		1700022A22Rik	RIKEN cDNA 1700022A22 gene	ncRNA
chr15-3081	chr15	45752029	45756265	+	34.8	4236	Intergenic	L1_Mus3|LINE|L1	-570438	NR_045509	71120	Mm.158571	NR_045509		1700022A22Rik	RIKEN cDNA 1700022A22 gene	ncRNA
chr15-1660	chr15	46304640	46309210	+	33.7	4570	Intergenic	ERVB5_1-I_MM-int|LTR|ERVK	-17660	NR_045509	71120	Mm.158571	NR_045509		1700022A22Rik	RIKEN cDNA 1700022A22 gene	ncRNA
chr15-5877	chr15	45883457	45886308	+	22.1	2851	Intergenic	Lx|LINE|L1	-439703	NR_045509	71120	Mm.158571	NR_045509		1700022A22Rik	RIKEN cDNA 1700022A22 gene	ncRNA
chr15-5875	chr15	45804377	45807028	+	21	2651	Intergenic	Lx2A|LINE|L1	-518883	NR_045509	71120	Mm.158571	NR_045509		1700022A22Rik	RIKEN cDNA 1700022A22 gene	ncRNA
chr15-4947	chr15	45808656	45810842	+	18.1	2186	Intergenic	Lx3B|LINE|L1	-514836	NR_045509	71120	Mm.158571	NR_045509		1700022A22Rik	RIKEN cDNA 1700022A22 gene	ncRNA
chr15-3085	chr15	46216397	46218491	+	16.8	2094	Intergenic	RMER6C|LTR|ERVK	-107141	NR_045509	71120	Mm.158571	NR_045509		1700022A22Rik	RIKEN cDNA 1700022A22 gene	ncRNA
chr15-4235	chr15	45970748	45972614	+	15.4	1866	Intergenic	(CAAAAA)n|Simple_repeat|Simple_repeat	-352904	NR_045509	71120	Mm.158571	NR_045509		1700022A22Rik	RIKEN cDNA 1700022A22 gene	ncRNA
chr15-4949	chr15	45878069	45879888	+	14.5	1819	Intergenic	L1MB5|LINE|L1	-445607	NR_045509	71120	Mm.158571	NR_045509		1700022A22Rik	RIKEN cDNA 1700022A22 gene	ncRNA
chr15-4239	chr15	46318981	46320612	+	13.2	1631	Intergenic	L1Md_A|LINE|L1	-4789	NR_045509	71120	Mm.158571	NR_045509		1700022A22Rik	RIKEN cDNA 1700022A22 gene	ncRNA
chr15-2623	chr15	46041638	46043074	+	13	1436	Intergenic	MMERVK9E_I-int|LTR|ERVK	-282229	NR_045509	71120	Mm.158571	NR_045509		1700022A22Rik	RIKEN cDNA 1700022A22 gene	ncRNA
chr15-1928	chr15	45901856	45903251	+	12.4	1395	Intergenic	RLTR17B_Mm|LTR|ERVK	-422032	NR_045509	71120	Mm.158571	NR_045509		1700022A22Rik	RIKEN cDNA 1700022A22 gene	ncRNA
chr15-3630	chr15	46229206	46230473	+	10.3	1267	Intergenic	Lx5|LINE|L1	-94746	NR_045509	71120	Mm.158571	NR_045509		1700022A22Rik	RIKEN cDNA 1700022A22 gene	ncRNA
chr15-5879	chr15	46061176	46062504	+	9.7	1328	Intergenic	L1_Mur2|LINE|L1	-262745	NR_045509	71120	Mm.158571	NR_045509		1700022A22Rik	RIKEN cDNA 1700022A22 gene	ncRNA
chr15-1929	chr15	46172245	46173245	+	9.52	1000	Intergenic	RMER13A|LTR|ERVK	-151840	NR_045509	71120	Mm.158571	NR_045509		1700022A22Rik	RIKEN cDNA 1700022A22 gene	ncRNA
chr15-3629	chr15	45962581	45963581	+	8.97	1000	Intergenic	Intergenic	-361504	NR_045509	71120	Mm.158571	NR_045509		1700022A22Rik	RIKEN cDNA 1700022A22 gene	ncRNA
chr15-2622	chr15	46020365	46021365	+	8.79	1000	Intergenic	MMERVK9E_I-int|LTR|ERVK	-303720	NR_045509	71120	Mm.158571	NR_045509		1700022A22Rik	RIKEN cDNA 1700022A22 gene	ncRNA
chr15-2624	chr15	46182064	46183064	+	8.6	1000	Intergenic	ORR1B1-int|LTR|ERVL-MaLR	-142021	NR_045509	71120	Mm.158571	NR_045509		1700022A22Rik	RIKEN cDNA 1700022A22 gene	ncRNA
chr15-3086	chr15	46311522	46312522	+	8.6	1000	Intergenic	Intergenic	-12563	NR_045509	71120	Mm.158571	NR_045509		1700022A22Rik	RIKEN cDNA 1700022A22 gene	ncRNA
chr15-4237	chr15	46226621	46227621	+	8.42	1000	Intergenic	Intergenic	-97464	NR_045509	71120	Mm.158571	NR_045509		1700022A22Rik	RIKEN cDNA 1700022A22 gene	ncRNA
chr15-5876	chr15	45860795	45861795	+	8.24	1000	Intergenic	L1VL4|LINE|L1	-463290	NR_045509	71120	Mm.158571	NR_045509		1700022A22Rik	RIKEN cDNA 1700022A22 gene	ncRNA
chr15-4948	chr15	45871332	45872332	+	8.24	1000	Intergenic	ORR1D1|LTR|ERVL-MaLR	-452753	NR_045509	71120	Mm.158571	NR_045509		1700022A22Rik	RIKEN cDNA 1700022A22 gene	ncRNA
chr15-5873	chr15	45742841	45743841	+	8.24	1000	Intergenic	L1Md_F2|LINE|L1	-581244	NR_045509	71120	Mm.158571	NR_045509		1700022A22Rik	RIKEN cDNA 1700022A22 gene	ncRNA
chr15-3631	chr15	46252367	46253367	+	8.24	1000	Intergenic	Intergenic	-71718	NR_045509	71120	Mm.158571	NR_045509		1700022A22Rik	RIKEN cDNA 1700022A22 gene	ncRNA
chr15-4951	chr15	46284527	46285527	+	8.24	1000	Intergenic	Intergenic	-39558	NR_045509	71120	Mm.158571	NR_045509		1700022A22Rik	RIKEN cDNA 1700022A22 gene	ncRNA
chr15-4953	chr15	46347689	46348689	+	8.05	1000	intron (NR_045509, intron 2 of 3)	L1_Mur1|LINE|L1	23604	NR_045509	71120	Mm.158571	NR_045509		1700022A22Rik	RIKEN cDNA 1700022A22 gene	ncRNA
chr15-5878	chr15	45944364	45945364	+	7.87	1000	Intergenic	RMER17D2|LTR|ERVK	-379721	NR_045509	71120	Mm.158571	NR_045509		1700022A22Rik	RIKEN cDNA 1700022A22 gene	ncRNA
chr15-4950	chr15	45918489	45919489	+	7.87	1000	Intergenic	RodERV21-int|LTR|ERV1	-405596	NR_045509	71120	Mm.158571	NR_045509		1700022A22Rik	RIKEN cDNA 1700022A22 gene	ncRNA
chr16-3888	chr16	59463522	59464522	+	8.24	1000	Intergenic	Intergenic	5216	NR_040568	75636	Mm.490522	NR_040568		1700022E09Rik	RIKEN cDNA 1700022E09 gene	ncRNA
chr12-5841	chr12	9530894	9534354	+	25.4	3460	Intergenic	L1M5|LINE|L1	37961	NR_045488	69420	Mm.396193	NR_045488		1700022H16Rik	RIKEN cDNA 1700022H16 gene	ncRNA
chr12-4955	chr12	9413314	9414620	+	10.8	1306	Intergenic	MTD|LTR|ERVL-MaLR	156618	NR_045488	69420	Mm.396193	NR_045488		1700022H16Rik	RIKEN cDNA 1700022H16 gene	ncRNA
chr11-7317	chr11	109870765	109871765	+	8.42	1000	Intergenic	Intergenic	25387	NR_045909	73257	Mm.250442	NR_045909	ENSMUSG00000087393	1700023C21Rik	RIKEN cDNA 1700023C21 gene	ncRNA
chr10-4182	chr10	65614343	65630064	+	121.5	15721	Intergenic	Intergenic	501861	NR_038039	69433	Mm.23366	NR_038039		1700023F02Rik	RIKEN cDNA 1700023F02 gene	ncRNA
chr10-2156	chr10	65644988	65655932	+	88.6	10944	Intergenic	Intergenic	473604	NR_038039	69433	Mm.23366	NR_038039		1700023F02Rik	RIKEN cDNA 1700023F02 gene	ncRNA
chr10-4960	chr10	65632634	65638909	+	54.2	6275	Intergenic	RLTR31B_Mm|LTR|ERVK	488293	NR_038039	69433	Mm.23366	NR_038039		1700023F02Rik	RIKEN cDNA 1700023F02 gene	ncRNA
chr10-4954	chr10	65576509	65581076	+	38.4	4567	Intergenic	Intergenic	545272	NR_038039	69433	Mm.23366	NR_038039		1700023F02Rik	RIKEN cDNA 1700023F02 gene	ncRNA
chr10-4955	chr10	65586096	65590468	+	37.9	4372	Intergenic	AT_rich|Low_complexity|Low_complexity	535782	NR_038039	69433	Mm.23366	NR_038039		1700023F02Rik	RIKEN cDNA 1700023F02 gene	ncRNA
chr10-9708	chr10	65838175	65842759	+	33.9	4584	Intergenic	Intergenic	283597	NR_038039	69433	Mm.23366	NR_038039		1700023F02Rik	RIKEN cDNA 1700023F02 gene	ncRNA
chr10-8236	chr10	65432462	65437067	+	33.5	4605	Intergenic	RSINE1|SINE|B4	689300	NR_038039	69433	Mm.23366	NR_038039		1700023F02Rik	RIKEN cDNA 1700023F02 gene	ncRNA
chr10-8254	chr10	66413486	66416776	+	27.8	3290	Intergenic	Intergenic	-291067	NR_038039	69433	Mm.23366	NR_038039		1700023F02Rik	RIKEN cDNA 1700023F02 gene	ncRNA
chr10-3034	chr10	65257794	65260776	+	26.7	2982	Intergenic	Intergenic	864779	NR_038039	69433	Mm.23366	NR_038039		1700023F02Rik	RIKEN cDNA 1700023F02 gene	ncRNA
chr10-8251	chr10	65884408	65887860	+	23.6	3452	Intergenic	AT_rich|Low_complexity|Low_complexity	237930	NR_038039	69433	Mm.23366	NR_038039		1700023F02Rik	RIKEN cDNA 1700023F02 gene	ncRNA
chr10-4179	chr10	65505119	65507754	+	21.8	2635	Intergenic	ORR1F|LTR|ERVL-MaLR	617628	NR_038039	69433	Mm.23366	NR_038039		1700023F02Rik	RIKEN cDNA 1700023F02 gene	ncRNA
chr10-9693	chr10	65600762	65603309	+	19.6	2547	Intergenic	Intergenic	522029	NR_038039	69433	Mm.23366	NR_038039		1700023F02Rik	RIKEN cDNA 1700023F02 gene	ncRNA
chr10-8234	chr10	65376013	65378492	+	18.1	2479	Intergenic	Intergenic	746812	NR_038039	69433	Mm.23366	NR_038039		1700023F02Rik	RIKEN cDNA 1700023F02 gene	ncRNA
chr10-4177	chr10	65264121	65266268	+	17.9	2147	Intergenic	L1VL2|LINE|L1	858870	NR_038039	69433	Mm.23366	NR_038039		1700023F02Rik	RIKEN cDNA 1700023F02 gene	ncRNA
chr10-3551	chr10	65831189	65833109	+	17.8	1920	Intergenic	RMER6C|LTR|ERVK	291915	NR_038039	69433	Mm.23366	NR_038039		1700023F02Rik	RIKEN cDNA 1700023F02 gene	ncRNA
chr10-1802	chr10	65809418	65811309	+	17.4	1891	Intergenic	Lx|LINE|L1	313701	NR_038039	69433	Mm.23366	NR_038039		1700023F02Rik	RIKEN cDNA 1700023F02 gene	ncRNA
chr10-8246	chr10	65689664	65691485	+	15	1821	Intergenic	Intergenic	433490	NR_038039	69433	Mm.23366	NR_038039		1700023F02Rik	RIKEN cDNA 1700023F02 gene	ncRNA
chr10-4965	chr10	66305563	66307221	+	14.6	1658	Intergenic	Intergenic	-182328	NR_038039	69433	Mm.23366	NR_038039		1700023F02Rik	RIKEN cDNA 1700023F02 gene	ncRNA
chr10-6958	chr10	65664098	65665839	+	14.3	1741	Intergenic	Intergenic	459096	NR_038039	69433	Mm.23366	NR_038039		1700023F02Rik	RIKEN cDNA 1700023F02 gene	ncRNA
chr10-706	chr10	65672158	65673603	+	14.3	1445	Intergenic	RLTR34B_MM|LTR|ERVK	451184	NR_038039	69433	Mm.23366	NR_038039		1700023F02Rik	RIKEN cDNA 1700023F02 gene	ncRNA
chr10-3543	chr10	65543291	65544933	+	13.9	1642	Intergenic	ORR1B1|LTR|ERVL-MaLR	579952	NR_038039	69433	Mm.23366	NR_038039		1700023F02Rik	RIKEN cDNA 1700023F02 gene	ncRNA
chr10-9690	chr10	65401068	65402801	+	12.8	1733	Intergenic	Intergenic	722130	NR_038039	69433	Mm.23366	NR_038039		1700023F02Rik	RIKEN cDNA 1700023F02 gene	ncRNA
chr10-5873	chr10	66009642	66011164	+	12.6	1522	Intergenic	Intergenic	113661	NR_038039	69433	Mm.23366	NR_038039		1700023F02Rik	RIKEN cDNA 1700023F02 gene	ncRNA
chr10-6964	chr10	66267976	66269526	+	12.6	1550	Intergenic	Lx7|LINE|L1	-144687	NR_038039	69433	Mm.23366	NR_038039		1700023F02Rik	RIKEN cDNA 1700023F02 gene	ncRNA
chr10-3043	chr10	65681186	65682662	+	12.4	1476	Intergenic	Intergenic	442140	NR_038039	69433	Mm.23366	NR_038039		1700023F02Rik	RIKEN cDNA 1700023F02 gene	ncRNA
chr10-3552	chr10	66478969	66480323	+	12.3	1354	Intergenic	MTEa|LTR|ERVL-MaLR	-355582	NR_038039	69433	Mm.23366	NR_038039		1700023F02Rik	RIKEN cDNA 1700023F02 gene	ncRNA
chr10-5868	chr10	65514109	65515463	+	11.3	1354	Intergenic	L1Md_F2|LINE|L1	609278	NR_038039	69433	Mm.23366	NR_038039		1700023F02Rik	RIKEN cDNA 1700023F02 gene	ncRNA
chr10-9711	chr10	66026021	66027373	+	11.2	1352	Intergenic	MTC|LTR|ERVL-MaLR	97367	NR_038039	69433	Mm.23366	NR_038039		1700023F02Rik	RIKEN cDNA 1700023F02 gene	ncRNA
chr10-8252	chr10	66236526	66237785	+	10.8	1259	Intergenic	Intergenic	-113091	NR_038039	69433	Mm.23366	NR_038039		1700023F02Rik	RIKEN cDNA 1700023F02 gene	ncRNA
chr10-5871	chr10	65878713	65879968	+	10.3	1255	Intergenic	L1_Mur2|LINE|L1	244724	NR_038039	69433	Mm.23366	NR_038039		1700023F02Rik	RIKEN cDNA 1700023F02 gene	ncRNA
chr10-3542	chr10	65379993	65381249	+	9.88	1256	Intergenic	ORR1B1|LTR|ERVL-MaLR	743443	NR_038039	69433	Mm.23366	NR_038039		1700023F02Rik	RIKEN cDNA 1700023F02 gene	ncRNA
chr10-3549	chr10	65719467	65720467	+	8.97	1000	Intergenic	Intergenic	404097	NR_038039	69433	Mm.23366	NR_038039		1700023F02Rik	RIKEN cDNA 1700023F02 gene	ncRNA
chr10-6951	chr10	65423269	65424269	+	8.79	1000	Intergenic	Lx5c|LINE|L1	700295	NR_038039	69433	Mm.23366	NR_038039		1700023F02Rik	RIKEN cDNA 1700023F02 gene	ncRNA
chr10-5875	chr10	66332695	66333695	+	8.79	1000	Intergenic	Intergenic	-209131	NR_038039	69433	Mm.23366	NR_038039		1700023F02Rik	RIKEN cDNA 1700023F02 gene	ncRNA
chr10-5872	chr10	66007096	66008096	+	8.79	1000	Intergenic	Intergenic	116468	NR_038039	69433	Mm.23366	NR_038039		1700023F02Rik	RIKEN cDNA 1700023F02 gene	ncRNA
chr10-4952	chr10	65390424	65391424	+	8.6	1000	Intergenic	Intergenic	733140	NR_038039	69433	Mm.23366	NR_038039		1700023F02Rik	RIKEN cDNA 1700023F02 gene	ncRNA
chr10-6962	chr10	65893909	65894909	+	8.6	1000	Intergenic	Intergenic	229655	NR_038039	69433	Mm.23366	NR_038039		1700023F02Rik	RIKEN cDNA 1700023F02 gene	ncRNA
chr10-6963	chr10	66150597	66151597	+	8.42	1000	Intergenic	Intergenic	-27033	NR_038039	69433	Mm.23366	NR_038039		1700023F02Rik	RIKEN cDNA 1700023F02 gene	ncRNA
chr10-6954	chr10	65547929	65548929	+	8.42	1000	Intergenic	Intergenic	575635	NR_038039	69433	Mm.23366	NR_038039		1700023F02Rik	RIKEN cDNA 1700023F02 gene	ncRNA
chr10-4964	chr10	66129410	66130410	+	8.42	1000	Intergenic	Intergenic	-5846	NR_038039	69433	Mm.23366	NR_038039		1700023F02Rik	RIKEN cDNA 1700023F02 gene	ncRNA
chr10-9713	chr10	66069813	66070813	+	8.24	1000	Intergenic	ORR1E|LTR|ERVL-MaLR	53751	NR_038039	69433	Mm.23366	NR_038039		1700023F02Rik	RIKEN cDNA 1700023F02 gene	ncRNA
chr10-9717	chr10	66475952	66476952	+	8.24	1000	Intergenic	Intergenic	-352388	NR_038039	69433	Mm.23366	NR_038039		1700023F02Rik	RIKEN cDNA 1700023F02 gene	ncRNA
chr10-5865	chr10	65371875	65372875	+	8.24	1000	Intergenic	Intergenic	751689	NR_038039	69433	Mm.23366	NR_038039		1700023F02Rik	RIKEN cDNA 1700023F02 gene	ncRNA
chr10-9687	chr10	65151257	65152257	+	8.24	1000	Intergenic	ERVL-E-int|LTR|ERVL	972307	NR_038039	69433	Mm.23366	NR_038039		1700023F02Rik	RIKEN cDNA 1700023F02 gene	ncRNA
chr10-8240	chr10	65610079	65611079	+	8.05	1000	Intergenic	L1_Mus3|LINE|L1	513485	NR_038039	69433	Mm.23366	NR_038039		1700023F02Rik	RIKEN cDNA 1700023F02 gene	ncRNA
chr10-9692	chr10	65535560	65536560	+	8.05	1000	Intergenic	Intergenic	588004	NR_038039	69433	Mm.23366	NR_038039		1700023F02Rik	RIKEN cDNA 1700023F02 gene	ncRNA
chr10-9688	chr10	65275499	65276499	+	8.05	1000	Intergenic	Lx7|LINE|L1	848065	NR_038039	69433	Mm.23366	NR_038039		1700023F02Rik	RIKEN cDNA 1700023F02 gene	ncRNA
chr10-8245	chr10	65686118	65687118	+	8.05	1000	Intergenic	Intergenic	437446	NR_038039	69433	Mm.23366	NR_038039		1700023F02Rik	RIKEN cDNA 1700023F02 gene	ncRNA
chr10-9707	chr10	65822710	65823710	+	8.05	1000	Intergenic	Intergenic	300854	NR_038039	69433	Mm.23366	NR_038039		1700023F02Rik	RIKEN cDNA 1700023F02 gene	ncRNA
chr10-9716	chr10	66401020	66402020	+	8.05	1000	Intergenic	Intergenic	-277456	NR_038039	69433	Mm.23366	NR_038039		1700023F02Rik	RIKEN cDNA 1700023F02 gene	ncRNA
chr10-9715	chr10	66382914	66383914	+	8.05	1000	Intergenic	Intergenic	-259350	NR_038039	69433	Mm.23366	NR_038039		1700023F02Rik	RIKEN cDNA 1700023F02 gene	ncRNA
chr10-8253	chr10	66379482	66380482	+	8.05	1000	Intergenic	Intergenic	-255918	NR_038039	69433	Mm.23366	NR_038039		1700023F02Rik	RIKEN cDNA 1700023F02 gene	ncRNA
chr10-9706	chr10	65758669	65759669	+	7.87	1000	Intergenic	Lx2|LINE|L1	364895	NR_038039	69433	Mm.23366	NR_038039		1700023F02Rik	RIKEN cDNA 1700023F02 gene	ncRNA
chr10-9714	chr10	66085829	66086829	+	7.69	1000	Intergenic	L1MC2|LINE|L1	37735	NR_038039	69433	Mm.23366	NR_038039		1700023F02Rik	RIKEN cDNA 1700023F02 gene	ncRNA
chr10-9712	chr10	66066657	66067657	+	7.69	1000	Intergenic	Lx8b|LINE|L1	56907	NR_038039	69433	Mm.23366	NR_038039		1700023F02Rik	RIKEN cDNA 1700023F02 gene	ncRNA
chr10-8233	chr10	65297082	65298082	+	7.69	1000	Intergenic	Intergenic	826482	NR_038039	69433	Mm.23366	NR_038039		1700023F02Rik	RIKEN cDNA 1700023F02 gene	ncRNA
chr10-9710	chr10	65961735	65962735	+	7.5	1000	Intergenic	Intergenic	161829	NR_038039	69433	Mm.23366	NR_038039		1700023F02Rik	RIKEN cDNA 1700023F02 gene	ncRNA
chr11-5602	chr11	103200567	103204065	+	29.5	3498	intron (NM_001254724, intron 1 of 9)	intron (NM_001254724, intron 1 of 9)	6232	NM_001254724	69441	Mm.380648	NM_027082	ENSMUSG00000020940	1700023F06Rik	RIKEN cDNA 1700023F06 gene	protein-coding
chr11-8273	chr11	103194579	103197736	+	25.3	3157	intron (NM_001077698, intron 19 of 25)	intron (NM_001077698, intron 19 of 25)	12391	NM_001254724	69441	Mm.380648	NM_027082	ENSMUSG00000020940	1700023F06Rik	RIKEN cDNA 1700023F06 gene	protein-coding
chr11-5600	chr11	103190469	103192060	+	13.4	1591	intron (NM_001077698, intron 11 of 25)	B3|SINE|B2	17284	NM_001254724	69441	Mm.380648	NM_027082	ENSMUSG00000020940	1700023F06Rik	RIKEN cDNA 1700023F06 gene	protein-coding
chr11-5604	chr11	103210635	103211887	+	9.88	1252	intron (NM_177801, intron 1 of 4)	intron (NM_177801, intron 1 of 4)	-2713	NM_001254724	69441	Mm.380648	NM_027082	ENSMUSG00000020940	1700023F06Rik	RIKEN cDNA 1700023F06 gene	protein-coding
chr14-3490	chr14	123886527	123888718	+	20	2191	intron (NM_145467, intron 7 of 10)	intron (NM_145467, intron 7 of 10)	-100013	NR_045479	69393	Mm.491348	NR_045479		1700024B18Rik	RIKEN cDNA 1700024B18 gene	ncRNA
chr14-6236	chr14	123911998	123914151	+	19.4	2153	intron (NM_145467, intron 7 of 10)	Lx5c|LINE|L1	-74561	NR_045479	69393	Mm.491348	NR_045479		1700024B18Rik	RIKEN cDNA 1700024B18 gene	ncRNA
chr14-6237	chr14	123940341	123941943	+	12.8	1602	intron (NM_145467, intron 7 of 10)	intron (NM_145467, intron 7 of 10)	-46493	NR_045479	69393	Mm.491348	NR_045479		1700024B18Rik	RIKEN cDNA 1700024B18 gene	ncRNA
chr14-6234	chr14	123848729	123849980	+	10.8	1251	intron (NM_145467, intron 6 of 10)	intron (NM_145467, intron 6 of 10)	-138281	NR_045479	69393	Mm.491348	NR_045479		1700024B18Rik	RIKEN cDNA 1700024B18 gene	ncRNA
chr14-3489	chr14	123882696	123883966	+	10.8	1270	intron (NM_145467, intron 7 of 10)	ORR1E|LTR|ERVL-MaLR	-104304	NR_045479	69393	Mm.491348	NR_045479		1700024B18Rik	RIKEN cDNA 1700024B18 gene	ncRNA
chr14-9159	chr14	123845870	123846870	+	8.24	1000	intron (NM_145467, intron 5 of 10)	intron (NM_145467, intron 5 of 10)	-141265	NR_045479	69393	Mm.491348	NR_045479		1700024B18Rik	RIKEN cDNA 1700024B18 gene	ncRNA
chr14-9160	chr14	123863241	123864241	+	8.24	1000	intron (NM_145467, intron 7 of 10)	intron (NM_145467, intron 7 of 10)	-123894	NR_045479	69393	Mm.491348	NR_045479		1700024B18Rik	RIKEN cDNA 1700024B18 gene	ncRNA
chr14-9161	chr14	124076734	124077734	+	8.05	1000	intron (NM_010201, intron 3 of 4)	L1Md_F2|LINE|L1	89599	NR_045479	69393	Mm.491348	NR_045479		1700024B18Rik	RIKEN cDNA 1700024B18 gene	ncRNA
chr14-7535	chr14	123958034	123959034	+	8.05	1000	intron (NM_145467, intron 8 of 10)	intron (NM_145467, intron 8 of 10)	-29101	NR_045479	69393	Mm.491348	NR_045479		1700024B18Rik	RIKEN cDNA 1700024B18 gene	ncRNA
chr14-5247	chr14	32421972	32426029	+	28.9	4057	intron (NM_009891, intron 10 of 15)	intron (NM_009891, intron 10 of 15)	-35627	NM_001034037	67085	Mm.109099	NM_001034037	ENSMUSG00000072473	1700024G13Rik	RIKEN cDNA 1700024G13 gene	protein-coding
chr14-3581	chr14	32356013	32357273	+	10.1	1260	Intergenic	MTD|LTR|ERVL-MaLR	31730	NM_001034037	67085	Mm.109099	NM_001034037	ENSMUSG00000072473	1700024G13Rik	RIKEN cDNA 1700024G13 gene	protein-coding
chr14-2416	chr14	32401393	32402393	+	9.15	1000	Intergenic	Intergenic	-13520	NM_001034037	67085	Mm.109099	NM_001034037	ENSMUSG00000072473	1700024G13Rik	RIKEN cDNA 1700024G13 gene	protein-coding
chr14-7706	chr14	32358847	32359847	+	8.05	1000	Intergenic	MTD|LTR|ERVL-MaLR	29026	NM_001034037	67085	Mm.109099	NM_001034037	ENSMUSG00000072473	1700024G13Rik	RIKEN cDNA 1700024G13 gene	protein-coding
chr13-8696	chr13	98996403	98998835	+	18.1	2432	Intergenic	Intergenic	-13054	NM_027064	69382	Mm.45466	NM_027064	ENSMUSG00000045022	1700024P04Rik	RIKEN cDNA 1700024P04 gene	protein-coding
chr13-5538	chr13	99000348	99001348	+	8.42	1000	Intergenic	ORR1B2|LTR|ERVL-MaLR	-16283	NM_027064	69382	Mm.45466	NM_027064	ENSMUSG00000045022	1700024P04Rik	RIKEN cDNA 1700024P04 gene	protein-coding
chr4-5106	chr4	104935932	104940634	+	39.2	4702	intron (NM_001285953, intron 1 of 19)	intron (NM_001285953, intron 1 of 19)	24827	NM_001285952	242594	Mm.65181	NM_001162980	ENSMUSG00000078612	1700024P16Rik	RIKEN cDNA 1700024P16 gene	protein-coding
chr4-5105	chr4	104914304	104915304	+	9.15	1000	intron (NM_001285953, intron 1 of 19)	intron (NM_001285953, intron 1 of 19)	1348	NM_001285952	242594	Mm.65181	NM_001162980	ENSMUSG00000078612	1700024P16Rik	RIKEN cDNA 1700024P16 gene	protein-coding
chr4-12572	chr4	104930076	104931076	+	7.87	1000	intron (NM_001285953, intron 1 of 19)	Lx9|LINE|L1	17120	NM_001285952	242594	Mm.65181	NM_001162980	ENSMUSG00000078612	1700024P16Rik	RIKEN cDNA 1700024P16 gene	protein-coding
chr2-6805	chr2	165108251	165113556	+	41.4	5305	TTS (NM_174988)	TTS (NM_174988)	-20153	NR_033448	72211	Mm.482899	NR_033448	ENSMUSG00000078935	1700025C18Rik	RIKEN cDNA 1700025C18 gene	ncRNA
chr2-8045	chr2	165156266	165157809	+	13.2	1543	intron (NM_174988, intron 4 of 11)	intron (NM_174988, intron 4 of 11)	-66287	NR_033448	72211	Mm.482899	NR_033448	ENSMUSG00000078935	1700025C18Rik	RIKEN cDNA 1700025C18 gene	ncRNA
chr2-12955	chr2	165105033	165106417	+	10.4	1384	Intergenic	Intergenic	-14975	NR_033448	72211	Mm.482899	NR_033448	ENSMUSG00000078935	1700025C18Rik	RIKEN cDNA 1700025C18 gene	ncRNA
chr2-4149	chr2	165096201	165097201	+	9.52	1000	Intergenic	Intergenic	-5951	NR_033448	72211	Mm.482899	NR_033448	ENSMUSG00000078935	1700025C18Rik	RIKEN cDNA 1700025C18 gene	ncRNA
chr2-11033	chr2	165152602	165153864	+	9.33	1262	intron (NM_174988, intron 4 of 11)	intron (NM_174988, intron 4 of 11)	-62483	NR_033448	72211	Mm.482899	NR_033448	ENSMUSG00000078935	1700025C18Rik	RIKEN cDNA 1700025C18 gene	ncRNA
chr2-8044	chr2	165130611	165131611	+	8.6	1000	intron (NM_174988, intron 8 of 11)	intron (NM_174988, intron 8 of 11)	-40361	NR_033448	72211	Mm.482899	NR_033448	ENSMUSG00000078935	1700025C18Rik	RIKEN cDNA 1700025C18 gene	ncRNA
chr2-12957	chr2	165117247	165118247	+	7.87	1000	intron (NM_174988, intron 10 of 11)	intron (NM_174988, intron 10 of 11)	-26997	NR_033448	72211	Mm.482899	NR_033448	ENSMUSG00000078935	1700025C18Rik	RIKEN cDNA 1700025C18 gene	ncRNA
chr10-8806	chr10	119329392	119330392	+	8.05	1000	Intergenic	Intergenic	-83552	NR_040578	67081	Mm.72644	NR_040578		1700025F24Rik	RIKEN cDNA 1700025F24 gene	ncRNA
chr17-9736	chr17	54581244	54584837	+	27.8	3593	Intergenic	MusHAL1|LINE|L1	-212966	NR_045825	69418	Mm.391004	NR_045825		1700025K24Rik	RIKEN cDNA 1700025K24 gene	ncRNA
chr17-6318	chr17	54589134	54592015	+	23.6	2881	Intergenic	Lx|LINE|L1	-220500	NR_045825	69418	Mm.391004	NR_045825		1700025K24Rik	RIKEN cDNA 1700025K24 gene	ncRNA
chr17-6319	chr17	54623429	54626055	+	19.4	2626	Intergenic	LTRIS2|LTR|ERV1	-254668	NR_045825	69418	Mm.391004	NR_045825		1700025K24Rik	RIKEN cDNA 1700025K24 gene	ncRNA
chr17-8460	chr17	54530621	54532185	+	12.4	1564	Intergenic	Lx8|LINE|L1	-161329	NR_045825	69418	Mm.391004	NR_045825		1700025K24Rik	RIKEN cDNA 1700025K24 gene	ncRNA
chr17-6315	chr17	54391976	54393346	+	12.3	1370	Intergenic	Intergenic	-22587	NR_045825	69418	Mm.391004	NR_045825		1700025K24Rik	RIKEN cDNA 1700025K24 gene	ncRNA
chr17-8462	chr17	54602030	54603397	+	11	1367	Intergenic	Intergenic	-232639	NR_045825	69418	Mm.391004	NR_045825		1700025K24Rik	RIKEN cDNA 1700025K24 gene	ncRNA
chr17-9733	chr17	54510534	54511795	+	10.1	1261	Intergenic	L1_Mus3|LINE|L1	-141090	NR_045825	69418	Mm.391004	NR_045825		1700025K24Rik	RIKEN cDNA 1700025K24 gene	ncRNA
chr17-8465	chr17	54900656	54901914	+	10.1	1258	Intergenic	Intergenic	-531211	NR_045825	69418	Mm.391004	NR_045825		1700025K24Rik	RIKEN cDNA 1700025K24 gene	ncRNA
chr17-8458	chr17	54441394	54442747	+	9.7	1353	Intergenic	RLTR30D2_MM|LTR|ERV1	-71996	NR_045825	69418	Mm.391004	NR_045825		1700025K24Rik	RIKEN cDNA 1700025K24 gene	ncRNA
chr17-4762	chr17	54758033	54759033	+	8.97	1000	Intergenic	L1_Mus4|LINE|L1	-388459	NR_045825	69418	Mm.391004	NR_045825		1700025K24Rik	RIKEN cDNA 1700025K24 gene	ncRNA
chr17-4761	chr17	54399371	54400371	+	8.97	1000	Intergenic	Lx5|LINE|L1	-29797	NR_045825	69418	Mm.391004	NR_045825		1700025K24Rik	RIKEN cDNA 1700025K24 gene	ncRNA
chr17-6320	chr17	54878002	54879002	+	8.79	1000	Intergenic	MER104|DNA|TcMar-Tc2	-508428	NR_045825	69418	Mm.391004	NR_045825		1700025K24Rik	RIKEN cDNA 1700025K24 gene	ncRNA
chr17-7327	chr17	54809586	54810586	+	8.42	1000	Intergenic	L1VL2|LINE|L1	-440012	NR_045825	69418	Mm.391004	NR_045825		1700025K24Rik	RIKEN cDNA 1700025K24 gene	ncRNA
chr17-8464	chr17	54870405	54871405	+	8.42	1000	Intergenic	Intergenic	-500831	NR_045825	69418	Mm.391004	NR_045825		1700025K24Rik	RIKEN cDNA 1700025K24 gene	ncRNA
chr17-7326	chr17	54640682	54641682	+	8.42	1000	Intergenic	Helitron1Na_Mam|RC|Helitron	-271108	NR_045825	69418	Mm.391004	NR_045825		1700025K24Rik	RIKEN cDNA 1700025K24 gene	ncRNA
chr17-7320	chr17	54502149	54503149	+	8.24	1000	Intergenic	Intergenic	-132575	NR_045825	69418	Mm.391004	NR_045825		1700025K24Rik	RIKEN cDNA 1700025K24 gene	ncRNA
chr17-7317	chr17	54428382	54429382	+	8.24	1000	Intergenic	Intergenic	-58808	NR_045825	69418	Mm.391004	NR_045825		1700025K24Rik	RIKEN cDNA 1700025K24 gene	ncRNA
chr17-9732	chr17	54434769	54435769	+	8.05	1000	Intergenic	Intergenic	-65195	NR_045825	69418	Mm.391004	NR_045825		1700025K24Rik	RIKEN cDNA 1700025K24 gene	ncRNA
chr17-7319	chr17	54455589	54456589	+	8.05	1000	Intergenic	L1_Rod|LINE|L1	-86015	NR_045825	69418	Mm.391004	NR_045825		1700025K24Rik	RIKEN cDNA 1700025K24 gene	ncRNA
chr17-9730	chr17	54356040	54357040	+	8.05	1000	intron (NR_045825, intron 2 of 2)	L1_Mur2|LINE|L1	13534	NR_045825	69418	Mm.391004	NR_045825		1700025K24Rik	RIKEN cDNA 1700025K24 gene	ncRNA
chr17-7321	chr17	54553482	54554482	+	8.05	1000	Intergenic	Intergenic	-183908	NR_045825	69418	Mm.391004	NR_045825		1700025K24Rik	RIKEN cDNA 1700025K24 gene	ncRNA
chr17-9735	chr17	54542959	54543959	+	8.05	1000	Intergenic	Intergenic	-173385	NR_045825	69418	Mm.391004	NR_045825		1700025K24Rik	RIKEN cDNA 1700025K24 gene	ncRNA
chr17-9731	chr17	54366627	54367627	+	7.87	1000	intron (NR_045825, intron 1 of 2)	intron (NR_045825, intron 1 of 2)	2947	NR_045825	69418	Mm.391004	NR_045825		1700025K24Rik	RIKEN cDNA 1700025K24 gene	ncRNA
chr17-9738	chr17	54643303	54644303	+	7.69	1000	Intergenic	L1_Mus1|LINE|L1	-273729	NR_045825	69418	Mm.391004	NR_045825		1700025K24Rik	RIKEN cDNA 1700025K24 gene	ncRNA
chr6-5063	chr6	39070551	39071807	+	10.4	1256	intron (NM_011539, intron 9 of 12)	intron (NM_011539, intron 9 of 12)	-3593	NR_040523	69986	Mm.490941	NR_040523		1700025N23Rik	RIKEN cDNA 1700025N23 gene	ncRNA
chr6-12006	chr6	39005523	39006523	+	8.05	1000	intron (NM_011539, intron 5 of 12)	Eulor2A|DNA?|DNA?	61563	NR_040523	69986	Mm.490941	NR_040523		1700025N23Rik	RIKEN cDNA 1700025N23 gene	ncRNA
chr8-2820	chr8	70994613	71001007	+	47.4	6394	Intergenic	Intergenic	28945	NR_045487	69419	Mm.188688	NR_045487		1700026F02Rik	RIKEN cDNA 1700026F02 gene	ncRNA
chr8-1370	chr8	71130679	71133286	+	22.9	2607	Intergenic	Intergenic	-105227	NR_045487	69419	Mm.188688	NR_045487		1700026F02Rik	RIKEN cDNA 1700026F02 gene	ncRNA
chr8-4088	chr8	71003284	71004558	+	10.6	1274	Intergenic	Intergenic	22834	NR_045487	69419	Mm.188688	NR_045487		1700026F02Rik	RIKEN cDNA 1700026F02 gene	ncRNA
chr8-1974	chr8	71147496	71148496	+	9.52	1000	Intergenic	L1_Mus4|LINE|L1	-121241	NR_045487	69419	Mm.188688	NR_045487		1700026F02Rik	RIKEN cDNA 1700026F02 gene	ncRNA
chr5-11171	chr5	64424291	64425953	+	13.9	1662	Intergenic	MLT1A0-int|LTR|ERVL-MaLR	42820	NR_040681	69999	Mm.261413	NR_040681		1700027F09Rik	RIKEN cDNA 1700027F09 gene	ncRNA
chr3-5962	chr3	45678704	45688094	+	74.7	9390	Intergenic	L1_Mur2|LINE|L1	-244090	NR_040594	72274	Mm.396202	NR_040594		1700027H10Rik	RIKEN cDNA 1700027H10 gene	ncRNA
chr3-14284	chr3	45573362	45577882	+	32	4520	Intergenic	Intergenic	-136313	NR_040594	72274	Mm.396202	NR_040594		1700027H10Rik	RIKEN cDNA 1700027H10 gene	ncRNA
chr3-10104	chr3	45867632	45871391	+	29.7	3759	Intergenic	Intergenic	-430202	NR_040594	72274	Mm.396202	NR_040594		1700027H10Rik	RIKEN cDNA 1700027H10 gene	ncRNA
chr3-14292	chr3	45879497	45883066	+	28.7	3569	Intergenic	Intergenic	-441972	NR_040594	72274	Mm.396202	NR_040594		1700027H10Rik	RIKEN cDNA 1700027H10 gene	ncRNA
chr3-14283	chr3	45550940	45554804	+	28	3864	Intergenic	Lx4B|LINE|L1	-113563	NR_040594	72274	Mm.396202	NR_040594		1700027H10Rik	RIKEN cDNA 1700027H10 gene	ncRNA
chr3-7140	chr3	45695708	45698476	+	23.1	2768	Intergenic	Intergenic	-257783	NR_040594	72274	Mm.396202	NR_040594		1700027H10Rik	RIKEN cDNA 1700027H10 gene	ncRNA
chr3-14286	chr3	45594322	45596757	+	20.1	2435	Intergenic	Intergenic	-156230	NR_040594	72274	Mm.396202	NR_040594		1700027H10Rik	RIKEN cDNA 1700027H10 gene	ncRNA
chr3-10090	chr3	45484640	45486979	+	17.8	2339	Intergenic	Intergenic	-46500	NR_040594	72274	Mm.396202	NR_040594		1700027H10Rik	RIKEN cDNA 1700027H10 gene	ncRNA
chr3-7142	chr3	45850665	45852249	+	13.7	1584	Intergenic	Lx10|LINE|L1	-412148	NR_040594	72274	Mm.396202	NR_040594		1700027H10Rik	RIKEN cDNA 1700027H10 gene	ncRNA
chr3-5964	chr3	45777937	45779494	+	13.2	1557	Intergenic	RLTR34C_MM|LTR|ERVK	-339406	NR_040594	72274	Mm.396202	NR_040594		1700027H10Rik	RIKEN cDNA 1700027H10 gene	ncRNA
chr3-8513	chr3	45833807	45835369	+	12.8	1562	Intergenic	MTD|LTR|ERVL-MaLR	-395279	NR_040594	72274	Mm.396202	NR_040594		1700027H10Rik	RIKEN cDNA 1700027H10 gene	ncRNA
chr3-10102	chr3	45709523	45710975	+	12.6	1452	Intergenic	RMER15|LTR|ERVL	-270940	NR_040594	72274	Mm.396202	NR_040594		1700027H10Rik	RIKEN cDNA 1700027H10 gene	ncRNA
chr3-10095	chr3	45673154	45674572	+	11.7	1418	Intergenic	L1MA5A|LINE|L1	-234554	NR_040594	72274	Mm.396202	NR_040594		1700027H10Rik	RIKEN cDNA 1700027H10 gene	ncRNA
chr3-12049	chr3	45420986	45422617	+	11.5	1631	3' UTR (NM_001098171, exon 5 of 5)	3' UTR (NM_001098171, exon 5 of 5)	17508	NR_040594	72274	Mm.396202	NR_040594		1700027H10Rik	RIKEN cDNA 1700027H10 gene	ncRNA
chr3-8514	chr3	45942333	45943726	+	11.3	1393	Intergenic	L1_Mus4|LINE|L1	-503720	NR_040594	72274	Mm.396202	NR_040594		1700027H10Rik	RIKEN cDNA 1700027H10 gene	ncRNA
chr3-4160	chr3	45614737	45615992	+	10.8	1255	Intergenic	Intergenic	-176055	NR_040594	72274	Mm.396202	NR_040594		1700027H10Rik	RIKEN cDNA 1700027H10 gene	ncRNA
chr3-12058	chr3	45840507	45841895	+	10.3	1388	Intergenic	L1_Mus2|LINE|L1	-401892	NR_040594	72274	Mm.396202	NR_040594		1700027H10Rik	RIKEN cDNA 1700027H10 gene	ncRNA
chr3-14296	chr3	45934544	45935879	+	10.3	1335	Intergenic	Intergenic	-495902	NR_040594	72274	Mm.396202	NR_040594		1700027H10Rik	RIKEN cDNA 1700027H10 gene	ncRNA
chr3-2438	chr3	45872961	45873961	+	9.88	1000	Intergenic	Intergenic	-434152	NR_040594	72274	Mm.396202	NR_040594		1700027H10Rik	RIKEN cDNA 1700027H10 gene	ncRNA
chr3-3455	chr3	45534252	45535252	+	9.52	1000	Intergenic	Intergenic	-95443	NR_040594	72274	Mm.396202	NR_040594		1700027H10Rik	RIKEN cDNA 1700027H10 gene	ncRNA
chr3-8509	chr3	45416271	45417525	+	9.52	1254	intron (NR_040594, intron 3 of 3)	intron (NR_040594, intron 3 of 3)	22411	NR_040594	72274	Mm.396202	NR_040594		1700027H10Rik	RIKEN cDNA 1700027H10 gene	ncRNA
chr3-10089	chr3	45447242	45448242	+	8.6	1000	Intergenic	Intergenic	-8433	NR_040594	72274	Mm.396202	NR_040594		1700027H10Rik	RIKEN cDNA 1700027H10 gene	ncRNA
chr3-10103	chr3	45827668	45828668	+	8.6	1000	Intergenic	Intergenic	-388859	NR_040594	72274	Mm.396202	NR_040594		1700027H10Rik	RIKEN cDNA 1700027H10 gene	ncRNA
chr3-10107	chr3	45938297	45939297	+	8.24	1000	Intergenic	Lx4A|LINE|L1	-499488	NR_040594	72274	Mm.396202	NR_040594		1700027H10Rik	RIKEN cDNA 1700027H10 gene	ncRNA
chr3-10106	chr3	45928128	45929128	+	8.24	1000	Intergenic	Lx|LINE|L1	-489319	NR_040594	72274	Mm.396202	NR_040594		1700027H10Rik	RIKEN cDNA 1700027H10 gene	ncRNA
chr3-10094	chr3	45645049	45646049	+	8.24	1000	Intergenic	MTD|LTR|ERVL-MaLR	-206240	NR_040594	72274	Mm.396202	NR_040594		1700027H10Rik	RIKEN cDNA 1700027H10 gene	ncRNA
chr3-12062	chr3	45905337	45906337	+	8.24	1000	Intergenic	L1_Mur3|LINE|L1	-466528	NR_040594	72274	Mm.396202	NR_040594		1700027H10Rik	RIKEN cDNA 1700027H10 gene	ncRNA
chr3-12050	chr3	45457184	45458184	+	8.24	1000	Intergenic	MTC|LTR|ERVL-MaLR	-18375	NR_040594	72274	Mm.396202	NR_040594		1700027H10Rik	RIKEN cDNA 1700027H10 gene	ncRNA
chr3-10092	chr3	45526653	45527653	+	8.24	1000	Intergenic	Lx8b|LINE|L1	-87844	NR_040594	72274	Mm.396202	NR_040594		1700027H10Rik	RIKEN cDNA 1700027H10 gene	ncRNA
chr3-10091	chr3	45493139	45494139	+	8.05	1000	Intergenic	Intergenic	-54330	NR_040594	72274	Mm.396202	NR_040594		1700027H10Rik	RIKEN cDNA 1700027H10 gene	ncRNA
chr3-12053	chr3	45666550	45667550	+	7.87	1000	Intergenic	L1_Mur3|LINE|L1	-227741	NR_040594	72274	Mm.396202	NR_040594		1700027H10Rik	RIKEN cDNA 1700027H10 gene	ncRNA
chr3-14288	chr3	45634358	45635358	+	7.87	1000	Intergenic	ORR1A2-int|LTR|ERVL-MaLR	-195549	NR_040594	72274	Mm.396202	NR_040594		1700027H10Rik	RIKEN cDNA 1700027H10 gene	ncRNA
chr3-14291	chr3	45804637	45805637	+	7.69	1000	Intergenic	RLTR11A|LTR|ERVK	-365828	NR_040594	72274	Mm.396202	NR_040594		1700027H10Rik	RIKEN cDNA 1700027H10 gene	ncRNA
chr9-6195	chr9	36665489	36670945	+	46.9	5456	TTS (NR_040741)	TTS (NR_040741)	24972	NR_040741	75567	Mm.426883	NR_040741	ENSMUSG00000098304	1700027I24Rik	RIKEN cDNA 1700027I24 gene	ncRNA
chr9-4447	chr9	36691000	36692777	+	14.8	1777	intron (NR_040741, intron 1 of 3)	intron (NR_040741, intron 1 of 3)	1301	NR_040741	75567	Mm.426883	NR_040741	ENSMUSG00000098304	1700027I24Rik	RIKEN cDNA 1700027I24 gene	ncRNA
chr10-7939	chr10	43775169	43776169	+	8.24	1000	Intergenic	Intergenic	29511	NR_040581	69443	Mm.484042	NR_040581		1700027J07Rik	RIKEN cDNA 1700027J07 gene	ncRNA
chr10-9375	chr10	43781941	43782941	+	8.24	1000	Intergenic	RMER19B2|LTR|ERVK	36283	NR_040581	69443	Mm.484042	NR_040581		1700027J07Rik	RIKEN cDNA 1700027J07 gene	ncRNA
chr7-11810	chr7	28473662	28477108	+	27.1	3446	intron (NR_030567, intron 2 of 4)	intron (NR_030567, intron 2 of 4)	-21556	NR_033605	70001	Mm.417851	NR_033605		1700028B04Rik	NADH dehydrogenase (ubiquinone) 1 beta subcomplex 8 pseudogene	pseudo
chr7-13572	chr7	28479991	28481485	+	12.3	1494	intron (NR_030567, intron 4 of 4)	RMER19B2|LTR|ERVK	-16203	NR_033605	70001	Mm.417851	NR_033605		1700028B04Rik	NADH dehydrogenase (ubiquinone) 1 beta subcomplex 8 pseudogene	pseudo
chr7-10221	chr7	28500378	28501378	+	8.42	1000	Intergenic	MTD|LTR|ERVL-MaLR	3937	NR_033605	70001	Mm.417851	NR_033605		1700028B04Rik	NADH dehydrogenase (ubiquinone) 1 beta subcomplex 8 pseudogene	pseudo
chr5-17929	chr5	112095003	112101043	+	54.9	6040	Intergenic	Intergenic	-108740	NR_045377	75569	Mm.243721	NR_045377		1700028D13Rik	RIKEN cDNA 1700028D13 gene	ncRNA
chr5-15510	chr5	112034563	112038640	+	32	4077	Intergenic	Intergenic	-170162	NR_045377	75569	Mm.243721	NR_045377		1700028D13Rik	RIKEN cDNA 1700028D13 gene	ncRNA
chr5-13447	chr5	112079868	112083271	+	28.9	3403	Intergenic	Intergenic	-125194	NR_045377	75569	Mm.243721	NR_045377		1700028D13Rik	RIKEN cDNA 1700028D13 gene	ncRNA
chr5-10084	chr5	112208625	112212354	+	25.6	3729	TTS (NR_045378)	TTS (NR_045378)	3726	NR_045378	75569	Mm.243721	NR_045377		1700028D13Rik	RIKEN cDNA 1700028D13 gene	ncRNA
chr5-15514	chr5	112116299	112119214	+	24.2	2915	Intergenic	Intergenic	-89007	NR_045377	75569	Mm.243721	NR_045377		1700028D13Rik	RIKEN cDNA 1700028D13 gene	ncRNA
chr5-5614	chr5	112184460	112186984	+	21.4	2524	Intergenic	Intergenic	-21041	NR_045377	75569	Mm.243721	NR_045377		1700028D13Rik	RIKEN cDNA 1700028D13 gene	ncRNA
chr5-7454	chr5	112123356	112126009	+	21.2	2653	Intergenic	Intergenic	-82081	NR_045377	75569	Mm.243721	NR_045377		1700028D13Rik	RIKEN cDNA 1700028D13 gene	ncRNA
chr5-10078	chr5	112016546	112018093	+	13.2	1547	Intergenic	Intergenic	-189444	NR_045377	75569	Mm.243721	NR_045377		1700028D13Rik	RIKEN cDNA 1700028D13 gene	ncRNA
chr5-7452	chr5	111990797	111992166	+	12.3	1369	Intergenic	Intergenic	-215282	NR_045377	75569	Mm.243721	NR_045377		1700028D13Rik	RIKEN cDNA 1700028D13 gene	ncRNA
chr5-17928	chr5	112027123	112028385	+	10.4	1262	Intergenic	Intergenic	-179009	NR_045377	75569	Mm.243721	NR_045377		1700028D13Rik	RIKEN cDNA 1700028D13 gene	ncRNA
chr5-6483	chr5	112007875	112008875	+	9.33	1000	Intergenic	Intergenic	-198388	NR_045377	75569	Mm.243721	NR_045377		1700028D13Rik	RIKEN cDNA 1700028D13 gene	ncRNA
chr5-11637	chr5	112013330	112014330	+	8.6	1000	Intergenic	Intergenic	-192933	NR_045377	75569	Mm.243721	NR_045377		1700028D13Rik	RIKEN cDNA 1700028D13 gene	ncRNA
chr5-13448	chr5	112177440	112178440	+	8.42	1000	Intergenic	Intergenic	-28823	NR_045377	75569	Mm.243721	NR_045377		1700028D13Rik	RIKEN cDNA 1700028D13 gene	ncRNA
chr5-15509	chr5	112004375	112005375	+	8.42	1000	Intergenic	B1_Mm|SINE|Alu	-201888	NR_045377	75569	Mm.243721	NR_045377		1700028D13Rik	RIKEN cDNA 1700028D13 gene	ncRNA
chr5-13446	chr5	112030122	112031122	+	8.05	1000	Intergenic	PB1D9|SINE|Alu	-176141	NR_045377	75569	Mm.243721	NR_045377		1700028D13Rik	RIKEN cDNA 1700028D13 gene	ncRNA
chr5-17930	chr5	112174402	112175402	+	7.69	1000	Intergenic	Intergenic	-31861	NR_045377	75569	Mm.243721	NR_045377		1700028D13Rik	RIKEN cDNA 1700028D13 gene	ncRNA
chr5-7933	chr5	151442816	151448169	+	48.3	5353	Intergenic	AT_rich|Low_complexity|Low_complexity	76817	NR_045700	625175	Mm.443286	NR_045699	ENSMUSG00000097321	1700028E10Rik	RIKEN cDNA 1700028E10 gene	ncRNA
chr5-10662	chr5	151438359	151440968	+	20.7	2609	Intergenic	MYSERV16_I-int|LTR|ERVK	70988	NR_045700	625175	Mm.443286	NR_045699	ENSMUSG00000097321	1700028E10Rik	RIKEN cDNA 1700028E10 gene	ncRNA
chr5-4506	chr5	151351215	151352695	+	14.8	1480	Intergenic	B4A|SINE|B4	-16720	NR_045699	625175	Mm.443286	NR_045699	ENSMUSG00000097321	1700028E10Rik	RIKEN cDNA 1700028E10 gene	ncRNA
chr5-6869	chr5	151459374	151460869	+	12.8	1495	Intergenic	Intergenic	91446	NR_045700	625175	Mm.443286	NR_045699	ENSMUSG00000097321	1700028E10Rik	RIKEN cDNA 1700028E10 gene	ncRNA
chr5-7936	chr5	151462444	151463444	+	9.15	1000	Intergenic	MTA_Mm|LTR|ERVL-MaLR	94269	NR_045700	625175	Mm.443286	NR_045699	ENSMUSG00000097321	1700028E10Rik	RIKEN cDNA 1700028E10 gene	ncRNA
chr5-12214	chr5	151469868	151470868	+	8.79	1000	Intergenic	MT-int|LTR|ERVL-MaLR	101693	NR_045700	625175	Mm.443286	NR_045699	ENSMUSG00000097321	1700028E10Rik	RIKEN cDNA 1700028E10 gene	ncRNA
chr3-8875	chr3	83454012	83459072	+	39.9	5060	Intergenic	Intergenic	117576	NR_036591	69460	Mm.389464	NR_036591		1700028M03Rik	RIKEN cDNA 1700028M03 gene	ncRNA
chr3-12631	chr3	83402406	83406032	+	28.6	3626	Intergenic	Intergenic	169899	NR_036591	69460	Mm.389464	NR_036591		1700028M03Rik	RIKEN cDNA 1700028M03 gene	ncRNA
chr3-4356	chr3	83537950	83541208	+	24.5	3258	Intergenic	Intergenic	34539	NR_036591	69460	Mm.389464	NR_036591		1700028M03Rik	RIKEN cDNA 1700028M03 gene	ncRNA
chr3-7490	chr3	83550686	83552218	+	13.2	1532	Intergenic	Intergenic	22666	NR_036591	69460	Mm.389464	NR_036591		1700028M03Rik	RIKEN cDNA 1700028M03 gene	ncRNA
chr3-6238	chr3	83345080	83346436	+	12.3	1356	Intergenic	Intergenic	228360	NR_036591	69460	Mm.389464	NR_036591		1700028M03Rik	RIKEN cDNA 1700028M03 gene	ncRNA
chr3-10601	chr3	83393841	83395111	+	11	1270	Intergenic	MMERVK10C-int|LTR|ERVK	179642	NR_036591	69460	Mm.389464	NR_036591		1700028M03Rik	RIKEN cDNA 1700028M03 gene	ncRNA
chr3-6239	chr3	83619640	83620902	+	10.8	1262	Intergenic	Intergenic	-46153	NR_036591	69460	Mm.389464	NR_036591		1700028M03Rik	RIKEN cDNA 1700028M03 gene	ncRNA
chr3-10605	chr3	83464470	83465735	+	9.7	1265	Intergenic	L1VL4|LINE|L1	109016	NR_036591	69460	Mm.389464	NR_036591		1700028M03Rik	RIKEN cDNA 1700028M03 gene	ncRNA
chr3-6240	chr3	83655567	83656567	+	8.97	1000	Intergenic	L1_Mus1|LINE|L1	-81949	NR_036591	69460	Mm.389464	NR_036591		1700028M03Rik	RIKEN cDNA 1700028M03 gene	ncRNA
chr3-12638	chr3	83589979	83590979	+	8.24	1000	Intergenic	Intergenic	-16361	NR_036591	69460	Mm.389464	NR_036591		1700028M03Rik	RIKEN cDNA 1700028M03 gene	ncRNA
chr3-12640	chr3	83627448	83628448	+	8.05	1000	Intergenic	Intergenic	-53830	NR_036591	69460	Mm.389464	NR_036591		1700028M03Rik	RIKEN cDNA 1700028M03 gene	ncRNA
chr3-12630	chr3	83376855	83377855	+	7.87	1000	Intergenic	Intergenic	196763	NR_036591	69460	Mm.389464	NR_036591		1700028M03Rik	RIKEN cDNA 1700028M03 gene	ncRNA
chr3-12637	chr3	83567426	83568426	+	7.87	1000	intron (NR_036591, intron 1 of 4)	B3|SINE|B2	6192	NR_036591	69460	Mm.389464	NR_036591		1700028M03Rik	RIKEN cDNA 1700028M03 gene	ncRNA
chr3-14988	chr3	83509323	83510323	+	7.32	1000	Intergenic	Intergenic	64295	NR_036591	69460	Mm.389464	NR_036591		1700028M03Rik	RIKEN cDNA 1700028M03 gene	ncRNA
chr19-3605	chr19	23666075	23667075	+	8.05	1000	Intergenic	Intergenic	-13763	NM_026188	67483	Mm.443287	NM_026188	ENSMUSG00000033053	1700028P14Rik	RIKEN cDNA 1700028P14 gene	protein-coding
chr2-5817	chr2	171412971	171413971	+	8.6	1000	Intergenic	Intergenic	549328	NR_040509	75655	Mm.396203	NR_040509	ENSMUSG00000086823	1700028P15Rik	RIKEN cDNA 1700028P15 gene	ncRNA
chr2-9463	chr2	171355679	171356679	+	8.42	1000	Intergenic	Intergenic	606620	NR_040509	75655	Mm.396203	NR_040509	ENSMUSG00000086823	1700028P15Rik	RIKEN cDNA 1700028P15 gene	ncRNA
chr2-13039	chr2	171469029	171470029	+	8.42	1000	Intergenic	ORR1C2-int|LTR|ERVL-MaLR	493270	NR_040509	75655	Mm.396203	NR_040509	ENSMUSG00000086823	1700028P15Rik	RIKEN cDNA 1700028P15 gene	ncRNA
chr2-11105	chr2	171875164	171876164	+	8.24	1000	Intergenic	RMER19B2|LTR|ERVK	87135	NR_040509	75655	Mm.396203	NR_040509	ENSMUSG00000086823	1700028P15Rik	RIKEN cDNA 1700028P15 gene	ncRNA
chr16-2434	chr16	93504413	93505413	+	9.15	1000	Intergenic	Intergenic	-46041	NR_040494	72264	Mm.396204	NR_040494		1700029J03Rik	RIKEN cDNA 1700029J03 gene	ncRNA
chr4-9514	chr4	135622784	135625112	+	20.1	2328	Intergenic	MIRb|SINE|MIR	-2707	NR_015613	73937	Mm.292326	NM_028688	ENSMUSG00000086788	1700029M20Rik	RIKEN cDNA 1700029M20 gene	ncRNA
chr4-9516	chr4	135653111	135655202	+	17.9	2091	Intergenic	MLT1H1|LTR|ERVL-MaLR	27501	NR_027909	73937	Mm.292326	NM_028688	ENSMUSG00000086788	1700029M20Rik	RIKEN cDNA 1700029M20 gene	ncRNA
chr4-2943	chr4	135628291	135629805	+	13.2	1514	non-coding (NR_015613, exon 3 of 3)	non-coding (NR_015613, exon 3 of 3)	2393	NR_027909	73937	Mm.292326	NM_028688	ENSMUSG00000086788	1700029M20Rik	RIKEN cDNA 1700029M20 gene	ncRNA
chr4-11073	chr4	135650430	135651430	+	8.42	1000	Intergenic	Intergenic	24275	NR_027909	73937	Mm.292326	NM_028688	ENSMUSG00000086788	1700029M20Rik	RIKEN cDNA 1700029M20 gene	ncRNA
chr13-3331	chr13	44401414	44402414	+	9.33	1000	Intergenic	Intergenic	-37813	NR_045489	69491	Mm.392410	NR_045489	ENSMUSG00000098144	1700029N11Rik	RIKEN cDNA 1700029N11 gene	ncRNA
chr12-14	chr12	20226972	20234810	+	169.9	7838	Intergenic	MMERGLN-int|LTR|ERV1	584888	NR_015521	69513	Mm.273972	NR_015521		1700030C10Rik	RIKEN cDNA 1700030C10 gene	ncRNA
chr12-2410	chr12	20291597	20301615	+	76.5	10018	Intergenic	IAP1-MM_LTR|LTR|ERVK	519173	NR_015521	69513	Mm.273972	NR_015521		1700030C10Rik	RIKEN cDNA 1700030C10 gene	ncRNA
chr12-5896	chr12	20777684	20784219	+	51.8	6535	Intergenic	Intergenic	34828	NR_015521	69513	Mm.273972	NR_015521		1700030C10Rik	RIKEN cDNA 1700030C10 gene	ncRNA
chr12-2884	chr12	20755506	20757160	+	14.1	1654	Intergenic	Intergenic	59446	NR_015521	69513	Mm.273972	NR_015521		1700030C10Rik	RIKEN cDNA 1700030C10 gene	ncRNA
chr12-4155	chr12	20679971	20681415	+	11.5	1444	Intergenic	Intergenic	135086	NR_015521	69513	Mm.273972	NR_015521		1700030C10Rik	RIKEN cDNA 1700030C10 gene	ncRNA
chr12-1713	chr12	20824851	20826148	+	11	1297	Intergenic	Intergenic	-9720	NR_015521	69513	Mm.273972	NR_015521		1700030C10Rik	RIKEN cDNA 1700030C10 gene	ncRNA
chr12-1712	chr12	20675441	20676441	+	8.79	1000	Intergenic	MMERVK9E_I-int|LTR|ERVK	139838	NR_015521	69513	Mm.273972	NR_015521		1700030C10Rik	RIKEN cDNA 1700030C10 gene	ncRNA
chr12-4153	chr12	20645781	20646781	+	8.6	1000	Intergenic	Intergenic	169498	NR_015521	69513	Mm.273972	NR_015521		1700030C10Rik	RIKEN cDNA 1700030C10 gene	ncRNA
chr12-4159	chr12	20847250	20848250	+	8.6	1000	Intergenic	IAPEY4_I-int|LTR|ERVK	-31971	NR_015521	69513	Mm.273972	NR_015521		1700030C10Rik	RIKEN cDNA 1700030C10 gene	ncRNA
chr12-3482	chr12	20705523	20706523	+	8.42	1000	Intergenic	Intergenic	109756	NR_015521	69513	Mm.273972	NR_015521		1700030C10Rik	RIKEN cDNA 1700030C10 gene	ncRNA
chr12-3485	chr12	20831265	20832265	+	8.42	1000	Intergenic	Intergenic	-15986	NR_015521	69513	Mm.273972	NR_015521		1700030C10Rik	RIKEN cDNA 1700030C10 gene	ncRNA
chr12-4154	chr12	20659327	20660327	+	8.42	1000	Intergenic	IAP-d-int|LTR|ERVK	155952	NR_015521	69513	Mm.273972	NR_015521		1700030C10Rik	RIKEN cDNA 1700030C10 gene	ncRNA
chr12-4998	chr12	20739705	20740705	+	8.24	1000	Intergenic	Intergenic	75574	NR_015521	69513	Mm.273972	NR_015521		1700030C10Rik	RIKEN cDNA 1700030C10 gene	ncRNA
chr12-4996	chr12	19669143	19670143	+	8.05	1000	Intergenic	B2_Mm2|SINE|B2	1146136	NR_015521	69513	Mm.273972	NR_015521		1700030C10Rik	RIKEN cDNA 1700030C10 gene	ncRNA
chr12-4158	chr12	20794059	20795059	+	7.87	1000	Intergenic	B3|SINE|B2	21220	NR_015521	69513	Mm.273972	NR_015521		1700030C10Rik	RIKEN cDNA 1700030C10 gene	ncRNA
chr6-3276	chr6	117593650	117595412	+	16.3	1762	Intergenic	Intergenic	157238	NR_045731	72263	Mm.443289	NR_045731		1700030F04Rik	RIKEN cDNA 1700030F04 gene	ncRNA
chr6-2283	chr6	117718951	117719951	+	9.88	1000	intron (NR_045731, intron 2 of 3)	L1MB3|LINE|L1	32318	NR_045731	72263	Mm.443289	NR_045731		1700030F04Rik	RIKEN cDNA 1700030F04 gene	ncRNA
chr6-3869	chr6	117690996	117691996	+	9.15	1000	intron (NR_045731, intron 3 of 3)	intron (NR_045731, intron 3 of 3)	60273	NR_045731	72263	Mm.443289	NR_045731		1700030F04Rik	RIKEN cDNA 1700030F04 gene	ncRNA
chr6-11022	chr6	117714261	117715261	+	7.87	1000	intron (NR_045731, intron 2 of 3)	intron (NR_045731, intron 2 of 3)	37008	NR_045731	72263	Mm.443289	NR_045731		1700030F04Rik	RIKEN cDNA 1700030F04 gene	ncRNA
chr15-3941	chr15	99946050	99947332	+	11.3	1282	Intergenic	Intergenic	-15033	NM_028180	72277	Mm.272766	NM_028180	ENSMUSG00000045350	1700030F18Rik	RIKEN cDNA 1700030F18 gene	protein-coding
chr3-9235	chr3	136461007	136464872	+	31.1	3865	Intergenic	Intergenic	-13590	NR_040592	70055	Mm.261063	NR_040592		1700030L20Rik	RIKEN cDNA 1700030L20 gene	ncRNA
chr19-2197	chr19	3167946	3170532	+	22.3	2586	intron (NR_045304, intron 2 of 2)	ERVB4_1-I_MM-int|LTR|ERVK	28464	NR_045304	70011	Mm.393871	NR_045304		1700030N03Rik	RIKEN cDNA 1700030N03 gene	ncRNA
chr19-2196	chr19	3160247	3161247	+	8.6	1000	intron (NR_045304, intron 2 of 2)	ERVB4_1-I_MM-int|LTR|ERVK	36956	NR_045304	70011	Mm.393871	NR_045304		1700030N03Rik	RIKEN cDNA 1700030N03 gene	ncRNA
chr19-2551	chr19	3148844	3149844	+	8.42	1000	Intergenic	Intergenic	48359	NR_045304	70011	Mm.393871	NR_045304		1700030N03Rik	RIKEN cDNA 1700030N03 gene	ncRNA
chr10-8787	chr10	116769073	116775207	+	45.4	6134	Intergenic	Intergenic	-42963	NR_045345	72286	Mm.396207	NR_045345		1700030O20Rik	RIKEN cDNA 1700030O20 gene	ncRNA
chr10-8786	chr10	116738830	116740235	+	11.3	1405	Intergenic	Intergenic	-10355	NR_045345	72286	Mm.396207	NR_045345		1700030O20Rik	RIKEN cDNA 1700030O20 gene	ncRNA
chr17-8206	chr17	36931812	36934780	+	18.7	2968	non-coding (NR_045439, exon 3 of 3)	non-coding (NR_045439, exon 3 of 3)	9504	NR_045439	73286	Mm.426884	NR_045439	ENSMUSG00000092239	1700031A10Rik	RIKEN cDNA 1700031A10 gene	ncRNA
chr17-7092	chr17	36911813	36912813	+	8.24	1000	Intergenic	Intergenic	-11479	NR_045439	73286	Mm.426884	NR_045439	ENSMUSG00000092239	1700031A10Rik	RIKEN cDNA 1700031A10 gene	ncRNA
chr15-2419	chr15	98400907	98402188	+	10.3	1281	intron (NR_015496, intron 2 of 10)	intron (NR_015496, intron 2 of 10)	3102	NR_015496	73302	Mm.272760	NR_015496		1700031M16Rik	RIKEN cDNA 1700031M16 gene	ncRNA
chr18-2676	chr18	52634735	52636368	+	12.8	1633	intron (NM_025749, intron 1 of 1)	intron (NM_025749, intron 1 of 1)	-10669	NM_030097	78414	Mm.273327	NM_030097	ENSMUSG00000024532	1700034E13Rik	RIKEN cDNA 1700034E13 gene	protein-coding
chr5-10108	chr5	112636776	112641654	+	43.4	4878	Intergenic	L1ME3E|LINE|L1	-49219	NR_045396	67325	Mm.490791	NR_045396	ENSMUSG00000097962	1700034G24Rik	RIKEN cDNA 1700034G24 gene	ncRNA
chr5-10111	chr5	112643628	112646197	+	20.3	2569	Intergenic	Intergenic	-54916	NR_045396	67325	Mm.490791	NR_045396	ENSMUSG00000097962	1700034G24Rik	RIKEN cDNA 1700034G24 gene	ncRNA
chr5-3114	chr5	112616199	112617912	+	15.2	1713	Intergenic	Intergenic	-27059	NR_045396	67325	Mm.490791	NR_045396	ENSMUSG00000097962	1700034G24Rik	RIKEN cDNA 1700034G24 gene	ncRNA
chr9-799	chr9	92931645	92951554	+	202.1	19909	Intergenic	MLT1G1|LTR|ERVL-MaLR	64134	NR_040756	78349	Mm.52612	NR_040756		1700034K08Rik	RIKEN cDNA 1700034K08 gene	ncRNA
chr9-6546	chr9	92912095	92929568	+	158	17473	Intergenic	B3A|SINE|B2	84902	NR_040756	78349	Mm.52612	NR_040756		1700034K08Rik	RIKEN cDNA 1700034K08 gene	ncRNA
chr9-6598	chr9	93681784	93701177	+	151.6	19393	Intergenic	Intergenic	-685747	NR_040756	78349	Mm.52612	NR_040756		1700034K08Rik	RIKEN cDNA 1700034K08 gene	ncRNA
chr9-3361	chr9	93328029	93340289	+	99	12260	Intergenic	Intergenic	-328426	NR_040756	78349	Mm.52612	NR_040756		1700034K08Rik	RIKEN cDNA 1700034K08 gene	ncRNA
chr9-4699	chr9	93453074	93463743	+	89.7	10669	Intergenic	MLT1I|LTR|ERVL-MaLR	-452675	NR_040756	78349	Mm.52612	NR_040756		1700034K08Rik	RIKEN cDNA 1700034K08 gene	ncRNA
chr9-7764	chr9	93652013	93662468	+	88.6	10455	Intergenic	Intergenic	-651507	NR_040756	78349	Mm.52612	NR_040756		1700034K08Rik	RIKEN cDNA 1700034K08 gene	ncRNA
chr9-4695	chr9	93310873	93322477	+	82.5	11604	Intergenic	Lx2B|LINE|L1	-310942	NR_040756	78349	Mm.52612	NR_040756		1700034K08Rik	RIKEN cDNA 1700034K08 gene	ncRNA
chr9-8986	chr9	93503136	93512390	+	77.2	9254	Intergenic	Intergenic	-502030	NR_040756	78349	Mm.52612	NR_040756		1700034K08Rik	RIKEN cDNA 1700034K08 gene	ncRNA
chr9-6596	chr9	93669844	93679553	+	76.7	9709	Intergenic	Lx2B2|LINE|L1	-668965	NR_040756	78349	Mm.52612	NR_040756		1700034K08Rik	RIKEN cDNA 1700034K08 gene	ncRNA
chr9-7715	chr9	93107585	93117857	+	73.6	10272	Intergenic	Intergenic	-106988	NR_040756	78349	Mm.52612	NR_040756		1700034K08Rik	RIKEN cDNA 1700034K08 gene	ncRNA
chr9-4685	chr9	92977564	92986388	+	71.6	8824	intron (NR_040756, intron 2 of 3)	RLTR13C2|LTR|ERVK	23757	NR_040756	78349	Mm.52612	NR_040756		1700034K08Rik	RIKEN cDNA 1700034K08 gene	ncRNA
chr9-8948	chr9	93092436	93102010	+	71.2	9574	Intergenic	Intergenic	-91490	NR_040756	78349	Mm.52612	NR_040756		1700034K08Rik	RIKEN cDNA 1700034K08 gene	ncRNA
chr9-7719	chr9	93195222	93203840	+	63.9	8618	Intergenic	Intergenic	-193798	NR_040756	78349	Mm.52612	NR_040756		1700034K08Rik	RIKEN cDNA 1700034K08 gene	ncRNA
chr9-7711	chr9	92991042	92998241	+	58.2	7199	intron (NR_040756, intron 2 of 3)	RLTR13D4|LTR|ERVK	11092	NR_040756	78349	Mm.52612	NR_040756		1700034K08Rik	RIKEN cDNA 1700034K08 gene	ncRNA
chr9-5596	chr9	93558862	93565935	+	55.1	7073	Intergenic	MERVL_2A-int|LTR|ERVL	-556665	NR_040756	78349	Mm.52612	NR_040756		1700034K08Rik	RIKEN cDNA 1700034K08 gene	ncRNA
chr9-8977	chr9	93420268	93427357	+	54.2	7089	Intergenic	L1MC2|LINE|L1	-418079	NR_040756	78349	Mm.52612	NR_040756		1700034K08Rik	RIKEN cDNA 1700034K08 gene	ncRNA
chr9-8974	chr9	93368446	93375148	+	53.3	6702	Intergenic	MTEb-int|LTR|ERVL-MaLR	-366064	NR_040756	78349	Mm.52612	NR_040756		1700034K08Rik	RIKEN cDNA 1700034K08 gene	ncRNA
chr9-6566	chr9	93242878	93250273	+	53.3	7395	Intergenic	Lx2|LINE|L1	-240842	NR_040756	78349	Mm.52612	NR_040756		1700034K08Rik	RIKEN cDNA 1700034K08 gene	ncRNA
chr9-3378	chr9	93763329	93770070	+	52	6741	Intergenic	L1_Mus1|LINE|L1	-760966	NR_040756	78349	Mm.52612	NR_040756		1700034K08Rik	RIKEN cDNA 1700034K08 gene	ncRNA
chr9-3355	chr9	93052022	93058244	+	51.8	6222	Intergenic	L1Md_F2|LINE|L1	-49400	NR_040756	78349	Mm.52612	NR_040756		1700034K08Rik	RIKEN cDNA 1700034K08 gene	ncRNA
chr9-8956	chr9	93146171	93152954	+	49.2	6783	Intergenic	RLTR14|LTR|ERV1	-143829	NR_040756	78349	Mm.52612	NR_040756		1700034K08Rik	RIKEN cDNA 1700034K08 gene	ncRNA
chr9-7748	chr9	93468131	93473775	+	43.6	5644	Intergenic	Intergenic	-465220	NR_040756	78349	Mm.52612	NR_040756		1700034K08Rik	RIKEN cDNA 1700034K08 gene	ncRNA
chr9-4004	chr9	93402262	93407445	+	42.3	5183	Intergenic	Lx9|LINE|L1	-399120	NR_040756	78349	Mm.52612	NR_040756		1700034K08Rik	RIKEN cDNA 1700034K08 gene	ncRNA
chr9-3377	chr9	93751063	93756661	+	41.5	5598	Intergenic	Intergenic	-748129	NR_040756	78349	Mm.52612	NR_040756		1700034K08Rik	RIKEN cDNA 1700034K08 gene	ncRNA
chr9-2068	chr9	93296655	93302249	+	41.5	5594	Intergenic	Intergenic	-293719	NR_040756	78349	Mm.52612	NR_040756		1700034K08Rik	RIKEN cDNA 1700034K08 gene	ncRNA
chr9-7727	chr9	93251902	93257479	+	41	5577	Intergenic	Intergenic	-248957	NR_040756	78349	Mm.52612	NR_040756		1700034K08Rik	RIKEN cDNA 1700034K08 gene	ncRNA
chr9-6588	chr9	93535924	93540866	+	39.9	4942	Intergenic	Lx2B|LINE|L1	-532662	NR_040756	78349	Mm.52612	NR_040756		1700034K08Rik	RIKEN cDNA 1700034K08 gene	ncRNA
chr9-2428	chr9	93352874	93358414	+	39.7	5540	Intergenic	ORR1C2|LTR|ERVL-MaLR	-349911	NR_040756	78349	Mm.52612	NR_040756		1700034K08Rik	RIKEN cDNA 1700034K08 gene	ncRNA
chr9-4019	chr9	93597342	93602539	+	39.7	5197	Intergenic	Intergenic	-594207	NR_040756	78349	Mm.52612	NR_040756		1700034K08Rik	RIKEN cDNA 1700034K08 gene	ncRNA
chr9-5569	chr9	92894621	92899329	+	36.6	4708	Intergenic	RLTR23|LTR|ERV1	108758	NR_040756	78349	Mm.52612	NR_040756		1700034K08Rik	RIKEN cDNA 1700034K08 gene	ncRNA
chr9-7774	chr9	93734599	93739122	+	35.3	4523	Intergenic	Intergenic	-731127	NR_040756	78349	Mm.52612	NR_040756		1700034K08Rik	RIKEN cDNA 1700034K08 gene	ncRNA
chr9-5570	chr9	92905006	92909557	+	35.1	4551	Intergenic	Intergenic	98452	NR_040756	78349	Mm.52612	NR_040756		1700034K08Rik	RIKEN cDNA 1700034K08 gene	ncRNA
chr9-2433	chr9	93584316	93588405	+	33.7	4089	Intergenic	Intergenic	-580627	NR_040756	78349	Mm.52612	NR_040756		1700034K08Rik	RIKEN cDNA 1700034K08 gene	ncRNA
chr9-4716	chr9	93639741	93644145	+	32.8	4404	Intergenic	PB1D7|SINE|Alu	-636210	NR_040756	78349	Mm.52612	NR_040756		1700034K08Rik	RIKEN cDNA 1700034K08 gene	ncRNA
chr9-4701	chr9	93490910	93494903	+	30.4	3993	Intergenic	Intergenic	-487173	NR_040756	78349	Mm.52612	NR_040756		1700034K08Rik	RIKEN cDNA 1700034K08 gene	ncRNA
chr9-3365	chr9	93442413	93445741	+	29.3	3328	Intergenic	Intergenic	-438344	NR_040756	78349	Mm.52612	NR_040756		1700034K08Rik	RIKEN cDNA 1700034K08 gene	ncRNA
chr9-5603	chr9	93630836	93634755	+	27.6	3919	Intergenic	Intergenic	-627062	NR_040756	78349	Mm.52612	NR_040756		1700034K08Rik	RIKEN cDNA 1700034K08 gene	ncRNA
chr9-9000	chr9	93741844	93745322	+	24.7	3478	Intergenic	Lx|LINE|L1	-737850	NR_040756	78349	Mm.52612	NR_040756		1700034K08Rik	RIKEN cDNA 1700034K08 gene	ncRNA
chr9-8972	chr9	93348176	93351328	+	24.5	3152	Intergenic	L1Md_F3|LINE|L1	-344019	NR_040756	78349	Mm.52612	NR_040756		1700034K08Rik	RIKEN cDNA 1700034K08 gene	ncRNA
chr9-2859	chr9	93291935	93294584	+	22.5	2649	Intergenic	Intergenic	-287526	NR_040756	78349	Mm.52612	NR_040756		1700034K08Rik	RIKEN cDNA 1700034K08 gene	ncRNA
chr9-4005	chr9	93410772	93413474	+	22.1	2702	Intergenic	Intergenic	-406390	NR_040756	78349	Mm.52612	NR_040756		1700034K08Rik	RIKEN cDNA 1700034K08 gene	ncRNA
chr9-5600	chr9	93577149	93579433	+	20.3	2284	Intergenic	Lx8|LINE|L1	-572558	NR_040756	78349	Mm.52612	NR_040756		1700034K08Rik	RIKEN cDNA 1700034K08 gene	ncRNA
chr9-8945	chr9	93079177	93081795	+	19.8	2618	Intergenic	RMER20A|LTR|ERVK	-74753	NR_040756	78349	Mm.52612	NR_040756		1700034K08Rik	RIKEN cDNA 1700034K08 gene	ncRNA
chr9-4707	chr9	93526282	93528273	+	16.3	1991	Intergenic	Lx2B2|LINE|L1	-521544	NR_040756	78349	Mm.52612	NR_040756		1700034K08Rik	RIKEN cDNA 1700034K08 gene	ncRNA
chr9-6560	chr9	93126805	93128728	+	16.1	1923	Intergenic	Intergenic	-122033	NR_040756	78349	Mm.52612	NR_040756		1700034K08Rik	RIKEN cDNA 1700034K08 gene	ncRNA
chr9-2867	chr9	93606222	93608045	+	15.9	1823	Intergenic	L1MCa|LINE|L1	-601400	NR_040756	78349	Mm.52612	NR_040756		1700034K08Rik	RIKEN cDNA 1700034K08 gene	ncRNA
chr9-2410	chr9	92885969	92887623	+	15.4	1654	Intergenic	Intergenic	118937	NR_040756	78349	Mm.52612	NR_040756		1700034K08Rik	RIKEN cDNA 1700034K08 gene	ncRNA
chr9-3370	chr9	93591301	93593077	+	14.6	1776	Intergenic	Intergenic	-586456	NR_040756	78349	Mm.52612	NR_040756		1700034K08Rik	RIKEN cDNA 1700034K08 gene	ncRNA
chr9-7722	chr9	93210608	93212375	+	13.9	1767	Intergenic	Intergenic	-205758	NR_040756	78349	Mm.52612	NR_040756		1700034K08Rik	RIKEN cDNA 1700034K08 gene	ncRNA
chr9-4014	chr9	93499873	93501549	+	13.5	1676	Intergenic	Intergenic	-494978	NR_040756	78349	Mm.52612	NR_040756		1700034K08Rik	RIKEN cDNA 1700034K08 gene	ncRNA
chr9-6579	chr9	93416197	93417889	+	13.2	1692	Intergenic	Intergenic	-411310	NR_040756	78349	Mm.52612	NR_040756		1700034K08Rik	RIKEN cDNA 1700034K08 gene	ncRNA
chr9-6552	chr9	92954839	92956459	+	12.8	1620	Intergenic	Intergenic	50084	NR_040756	78349	Mm.52612	NR_040756		1700034K08Rik	RIKEN cDNA 1700034K08 gene	ncRNA
chr9-8938	chr9	92963761	92965421	+	12.6	1660	Intergenic	Intergenic	41142	NR_040756	78349	Mm.52612	NR_040756		1700034K08Rik	RIKEN cDNA 1700034K08 gene	ncRNA
chr9-2425	chr9	93214913	93216313	+	12.4	1400	Intergenic	Intergenic	-209880	NR_040756	78349	Mm.52612	NR_040756		1700034K08Rik	RIKEN cDNA 1700034K08 gene	ncRNA
chr9-7761	chr9	93610448	93611990	+	12.4	1542	Intergenic	B3|SINE|B2	-605486	NR_040756	78349	Mm.52612	NR_040756		1700034K08Rik	RIKEN cDNA 1700034K08 gene	ncRNA
chr9-7758	chr9	93530949	93532619	+	12.3	1670	Intergenic	Intergenic	-526051	NR_040756	78349	Mm.52612	NR_040756		1700034K08Rik	RIKEN cDNA 1700034K08 gene	ncRNA
chr9-6563	chr9	93163098	93164483	+	11.7	1385	Intergenic	LTR102_Mam|LTR|ERVL	-158057	NR_040756	78349	Mm.52612	NR_040756		1700034K08Rik	RIKEN cDNA 1700034K08 gene	ncRNA
chr9-7753	chr9	93479512	93480941	+	11.5	1429	Intergenic	Intergenic	-474493	NR_040756	78349	Mm.52612	NR_040756		1700034K08Rik	RIKEN cDNA 1700034K08 gene	ncRNA
chr9-5595	chr9	93554164	93555475	+	11.2	1311	Intergenic	Intergenic	-549086	NR_040756	78349	Mm.52612	NR_040756		1700034K08Rik	RIKEN cDNA 1700034K08 gene	ncRNA
chr9-8967	chr9	93304233	93305734	+	11.2	1501	Intergenic	Intergenic	-299250	NR_040756	78349	Mm.52612	NR_040756		1700034K08Rik	RIKEN cDNA 1700034K08 gene	ncRNA
chr9-4693	chr9	93282141	93283512	+	11.2	1371	Intergenic	Intergenic	-277093	NR_040756	78349	Mm.52612	NR_040756		1700034K08Rik	RIKEN cDNA 1700034K08 gene	ncRNA
chr9-5573	chr9	92960595	92961870	+	11.2	1275	Intergenic	Intergenic	44501	NR_040756	78349	Mm.52612	NR_040756		1700034K08Rik	RIKEN cDNA 1700034K08 gene	ncRNA
chr9-2078	chr9	93636831	93638086	+	11	1255	Intergenic	Intergenic	-631725	NR_040756	78349	Mm.52612	NR_040756		1700034K08Rik	RIKEN cDNA 1700034K08 gene	ncRNA
chr9-4001	chr9	93279016	93280325	+	11	1309	Intergenic	RLTR15|LTR|ERVK	-273937	NR_040756	78349	Mm.52612	NR_040756		1700034K08Rik	RIKEN cDNA 1700034K08 gene	ncRNA
chr9-5613	chr9	93703500	93704793	+	10.4	1293	Intergenic	Lx9|LINE|L1	-698413	NR_040756	78349	Mm.52612	NR_040756		1700034K08Rik	RIKEN cDNA 1700034K08 gene	ncRNA
chr9-7730	chr9	93269716	93270991	+	10.3	1275	Intergenic	Intergenic	-264620	NR_040756	78349	Mm.52612	NR_040756		1700034K08Rik	RIKEN cDNA 1700034K08 gene	ncRNA
chr9-8960	chr9	93180185	93181499	+	9.88	1314	Intergenic	MTE-int|LTR|ERVL-MaLR	-175109	NR_040756	78349	Mm.52612	NR_040756		1700034K08Rik	RIKEN cDNA 1700034K08 gene	ncRNA
chr9-4012	chr9	93475951	93477250	+	9.7	1299	Intergenic	Intergenic	-470867	NR_040756	78349	Mm.52612	NR_040756		1700034K08Rik	RIKEN cDNA 1700034K08 gene	ncRNA
chr9-7725	chr9	93235199	93236493	+	9.7	1294	Intergenic	Intergenic	-230113	NR_040756	78349	Mm.52612	NR_040756		1700034K08Rik	RIKEN cDNA 1700034K08 gene	ncRNA
chr9-7773	chr9	93731604	93732604	+	8.6	1000	Intergenic	Lx3A|LINE|L1	-726371	NR_040756	78349	Mm.52612	NR_040756		1700034K08Rik	RIKEN cDNA 1700034K08 gene	ncRNA
chr9-5589	chr9	93391381	93392381	+	8.6	1000	Intergenic	Intergenic	-386148	NR_040756	78349	Mm.52612	NR_040756		1700034K08Rik	RIKEN cDNA 1700034K08 gene	ncRNA
chr9-6602	chr9	93725276	93726276	+	8.42	1000	Intergenic	RMER15-int|LTR|ERVL	-720043	NR_040756	78349	Mm.52612	NR_040756		1700034K08Rik	RIKEN cDNA 1700034K08 gene	ncRNA
chr9-8999	chr9	93722706	93723706	+	8.24	1000	Intergenic	RMER15-int|LTR|ERVL	-717473	NR_040756	78349	Mm.52612	NR_040756		1700034K08Rik	RIKEN cDNA 1700034K08 gene	ncRNA
chr9-7731	chr9	93273890	93274890	+	8.24	1000	Intergenic	Lx7|LINE|L1	-268657	NR_040756	78349	Mm.52612	NR_040756		1700034K08Rik	RIKEN cDNA 1700034K08 gene	ncRNA
chr9-8988	chr9	93517124	93518124	+	8.24	1000	Intergenic	Intergenic	-511891	NR_040756	78349	Mm.52612	NR_040756		1700034K08Rik	RIKEN cDNA 1700034K08 gene	ncRNA
chr9-8965	chr9	93222533	93223533	+	8.05	1000	Intergenic	MTEa|LTR|ERVL-MaLR	-217300	NR_040756	78349	Mm.52612	NR_040756		1700034K08Rik	RIKEN cDNA 1700034K08 gene	ncRNA
chr9-6605	chr9	93747642	93748642	+	8.05	1000	Intergenic	Intergenic	-742409	NR_040756	78349	Mm.52612	NR_040756		1700034K08Rik	RIKEN cDNA 1700034K08 gene	ncRNA
chr9-8998	chr9	93715251	93716251	+	8.05	1000	Intergenic	LTR80B|LTR|ERVL	-710018	NR_040756	78349	Mm.52612	NR_040756		1700034K08Rik	RIKEN cDNA 1700034K08 gene	ncRNA
chr9-8955	chr9	93123848	93124848	+	7.87	1000	Intergenic	Lx9|LINE|L1	-118615	NR_040756	78349	Mm.52612	NR_040756		1700034K08Rik	RIKEN cDNA 1700034K08 gene	ncRNA
chr9-8958	chr9	93155431	93156431	+	7.87	1000	Intergenic	L1Md_F2|LINE|L1	-150198	NR_040756	78349	Mm.52612	NR_040756		1700034K08Rik	RIKEN cDNA 1700034K08 gene	ncRNA
chr9-7724	chr9	93232064	93233064	+	7.87	1000	Intergenic	Lx4B|LINE|L1	-226831	NR_040756	78349	Mm.52612	NR_040756		1700034K08Rik	RIKEN cDNA 1700034K08 gene	ncRNA
chr9-7700	chr9	92889386	92890386	+	7.87	1000	Intergenic	Intergenic	115847	NR_040756	78349	Mm.52612	NR_040756		1700034K08Rik	RIKEN cDNA 1700034K08 gene	ncRNA
chr9-7756	chr9	93523582	93524582	+	7.87	1000	Intergenic	Intergenic	-518349	NR_040756	78349	Mm.52612	NR_040756		1700034K08Rik	RIKEN cDNA 1700034K08 gene	ncRNA
chr9-8961	chr9	93192428	93193428	+	7.87	1000	Intergenic	Intergenic	-187195	NR_040756	78349	Mm.52612	NR_040756		1700034K08Rik	RIKEN cDNA 1700034K08 gene	ncRNA
chr9-8976	chr9	93377020	93378020	+	7.5	1000	Intergenic	B3A|SINE|B2	-371787	NR_040756	78349	Mm.52612	NR_040756		1700034K08Rik	RIKEN cDNA 1700034K08 gene	ncRNA
chr3-10614	chr3	85418756	85421230	+	20	2474	Intergenic	Intergenic	102474	NR_040542	73283	Mm.489084	NR_040542		1700036G14Rik	RIKEN cDNA 1700036G14 gene	ncRNA
chr3-7496	chr3	85308231	85310108	+	16.5	1877	Intergenic	Intergenic	-8350	NR_040542	73283	Mm.489084	NR_040542		1700036G14Rik	RIKEN cDNA 1700036G14 gene	ncRNA
chr3-15003	chr3	85280221	85281221	+	8.05	1000	Intergenic	Intergenic	-36798	NR_040542	73283	Mm.489084	NR_040542		1700036G14Rik	RIKEN cDNA 1700036G14 gene	ncRNA
chr7-4992	chr7	45278395	45297196	+	164	18801	exon (NM_001033176, exon 5 of 6)	exon (NM_001033176, exon 5 of 6)	4922	NM_001033176	76713	Mm.425445	NM_001033176	ENSMUSG00000070568	1700039E15Rik	RIKEN cDNA 1700039E15 gene	protein-coding
chr7-7877	chr7	45268473	45275220	+	58.2	6747	Intergenic	B4A|SINE|B4	-11027	NM_001033176	76713	Mm.425445	NM_001033176	ENSMUSG00000070568	1700039E15Rik	RIKEN cDNA 1700039E15 gene	protein-coding
chr7-10568	chr7	45299832	45304062	+	31.3	4230	Intergenic	Intergenic	19074	NM_001033176	76713	Mm.425445	NM_001033176	ENSMUSG00000070568	1700039E15Rik	RIKEN cDNA 1700039E15 gene	protein-coding
chr7-12150	chr7	45259755	45262907	+	24.2	3152	Intergenic	Intergenic	-21542	NM_001033176	76713	Mm.425445	NM_001033176	ENSMUSG00000070568	1700039E15Rik	RIKEN cDNA 1700039E15 gene	protein-coding
chr19-1134	chr19	44829613	44840404	+	101.4	10791	intron (NM_011037, intron 8 of 9)	intron (NM_011037, intron 8 of 9)	930	NR_045315	73322	Mm.250457	NR_045315	ENSMUSG00000092369	1700039E22Rik	RIKEN cDNA 1700039E22 gene	ncRNA
chr19-1563	chr19	44872552	44878065	+	42.6	5513	Intergenic	Intergenic	-39370	NR_045315	73322	Mm.250457	NR_045315	ENSMUSG00000092369	1700039E22Rik	RIKEN cDNA 1700039E22 gene	ncRNA
chr19-3793	chr19	44846999	44851221	+	35.7	4222	Intergenic	Intergenic	-13172	NR_045315	73322	Mm.250457	NR_045315	ENSMUSG00000092369	1700039E22Rik	RIKEN cDNA 1700039E22 gene	ncRNA
chr19-3796	chr19	44864365	44868288	+	30.2	3923	Intergenic	RLTR17B_Mm|LTR|ERVK	-30388	NR_045315	73322	Mm.250457	NR_045315	ENSMUSG00000092369	1700039E22Rik	RIKEN cDNA 1700039E22 gene	ncRNA
chr19-3795	chr19	44858142	44861982	+	28.2	3840	Intergenic	Intergenic	-24124	NR_045315	73322	Mm.250457	NR_045315	ENSMUSG00000092369	1700039E22Rik	RIKEN cDNA 1700039E22 gene	ncRNA
chr19-3791	chr19	44843097	44845296	+	18.5	2199	Intergenic	Intergenic	-8258	NR_045315	73322	Mm.250457	NR_045315	ENSMUSG00000092369	1700039E22Rik	RIKEN cDNA 1700039E22 gene	ncRNA
chr19-1807	chr19	44823499	44825359	+	15.2	1860	intron (NM_011037, intron 7 of 9)	intron (NM_011037, intron 7 of 9)	11509	NR_045315	73322	Mm.250457	NR_045315	ENSMUSG00000092369	1700039E22Rik	RIKEN cDNA 1700039E22 gene	ncRNA
chr19-1809	chr19	44853719	44854719	+	8.97	1000	Intergenic	Intergenic	-18281	NR_045315	73322	Mm.250457	NR_045315	ENSMUSG00000092369	1700039E22Rik	RIKEN cDNA 1700039E22 gene	ncRNA
chr10-4201	chr10	68481663	68483251	+	12.6	1588	intron (NM_028491, intron 5 of 7)	intron (NM_028491, intron 5 of 7)	59418	NM_028491	73287	Mm.141830	NM_028491	ENSMUSG00000019945	1700040L02Rik	RIKEN cDNA 1700040L02 gene	protein-coding
chr10-9737	chr10	68587821	68588821	+	8.24	1000	Intergenic	Intergenic	-46446	NM_028491	73287	Mm.141830	NM_028491	ENSMUSG00000019945	1700040L02Rik	RIKEN cDNA 1700040L02 gene	protein-coding
chr10-8265	chr10	68613525	68614525	+	7.87	1000	Intergenic	Intergenic	-72150	NM_028491	73287	Mm.141830	NM_028491	ENSMUSG00000019945	1700040L02Rik	RIKEN cDNA 1700040L02 gene	protein-coding
chr9-8665	chr9	57198367	57199367	+	8.05	1000	Intergenic	Intergenic	23592	NR_033784	67319	Mm.234187	NR_033784		1700041C23Rik	RIKEN cDNA 1700041C23 gene	ncRNA
chr16-7282	chr16	76881567	76885688	+	27.1	4121	Intergenic	B3|SINE|B2	127254	NR_040573	76601	Mm.396217	NR_040573		1700041M19Rik	RIKEN cDNA 1700041M19 gene	ncRNA
chr16-2327	chr16	76932463	76934273	+	15.2	1810	Intergenic	Lx8|LINE|L1	77513	NR_040573	76601	Mm.396217	NR_040573		1700041M19Rik	RIKEN cDNA 1700041M19 gene	ncRNA
chr16-1924	chr16	76716080	76717080	+	9.15	1000	Intergenic	MLT1D|LTR|ERVL-MaLR	294301	NR_040573	76601	Mm.396217	NR_040573		1700041M19Rik	RIKEN cDNA 1700041M19 gene	ncRNA
chr16-7284	chr16	76955523	76956523	+	7.87	1000	Intergenic	MTE2a|LTR|ERVL-MaLR	54858	NR_040573	76601	Mm.396217	NR_040573		1700041M19Rik	RIKEN cDNA 1700041M19 gene	ncRNA
chr4-4963	chr4	57440620	57441620	+	9.15	1000	Intergenic	RMER6C|LTR|ERVK	-76828	NR_038179	73349	Mm.393774	NR_038178		1700042G15Rik	RIKEN cDNA 1700042G15 gene	ncRNA
chr4-12068	chr4	57435510	57436510	+	8.05	1000	Intergenic	Intergenic	-71718	NR_038179	73349	Mm.393774	NR_038178		1700042G15Rik	RIKEN cDNA 1700042G15 gene	ncRNA
chr4-12067	chr4	57430775	57431775	+	7.87	1000	Intergenic	Intergenic	-66983	NR_038179	73349	Mm.393774	NR_038178		1700042G15Rik	RIKEN cDNA 1700042G15 gene	ncRNA
chr14-5107	chr14	118320303	118324658	+	39.7	4355	Intergenic	Intergenic	-43398	NR_045624	73306	Mm.362328	NR_045624		1700044C05Rik	RIKEN cDNA 1700044C05 gene	ncRNA
chr14-9126	chr14	118372680	118373680	+	8.24	1000	intron (NR_045624, intron 3 of 5)	intron (NR_045624, intron 3 of 5)	7302	NR_045624	73306	Mm.362328	NR_045624		1700044C05Rik	RIKEN cDNA 1700044C05 gene	ncRNA
chr14-9127	chr14	118435519	118436519	+	7.87	1000	Intergenic	Intergenic	70141	NR_045624	73306	Mm.362328	NR_045624		1700044C05Rik	RIKEN cDNA 1700044C05 gene	ncRNA
chr14-7493	chr14	118390895	118391895	+	7.87	1000	intron (NR_045624, intron 4 of 5)	Lx7|LINE|L1	25517	NR_045624	73306	Mm.362328	NR_045624		1700044C05Rik	RIKEN cDNA 1700044C05 gene	ncRNA
chr18-4360	chr18	48928459	48932317	+	28.7	3858	Intergenic	L1_Mus3|LINE|L1	-592901	NR_033785	67321	Mm.245802	NR_033785		1700044K03Rik	RIKEN cDNA 1700044K03 gene	ncRNA
chr18-4362	chr18	49115707	49118210	+	21.2	2503	Intergenic	RSINE1|SINE|B4	-406331	NR_033785	67321	Mm.245802	NR_033785		1700044K03Rik	RIKEN cDNA 1700044K03 gene	ncRNA
chr18-2247	chr18	49369507	49371096	+	13.2	1589	Intergenic	B3A|SINE|B2	-152988	NR_033785	67321	Mm.245802	NR_033785		1700044K03Rik	RIKEN cDNA 1700044K03 gene	ncRNA
chr18-3135	chr18	48859277	48860277	+	8.6	1000	Intergenic	MLTR11A|LTR|ERVK	-663512	NR_033785	67321	Mm.245802	NR_033785		1700044K03Rik	RIKEN cDNA 1700044K03 gene	ncRNA
chr18-4358	chr18	48815595	48816595	+	8.24	1000	Intergenic	Intergenic	-707194	NR_033785	67321	Mm.245802	NR_033785		1700044K03Rik	RIKEN cDNA 1700044K03 gene	ncRNA
chr18-4359	chr18	48828963	48829963	+	8.05	1000	Intergenic	Intergenic	-693826	NR_033785	67321	Mm.245802	NR_033785		1700044K03Rik	RIKEN cDNA 1700044K03 gene	ncRNA
chr18-3705	chr18	48872674	48873674	+	7.69	1000	Intergenic	Intergenic	-650115	NR_033785	67321	Mm.245802	NR_033785		1700044K03Rik	RIKEN cDNA 1700044K03 gene	ncRNA
chr4-13045	chr4	150837712	150838712	+	8.05	1000	intron (NR_040649, intron 3 of 3)	intron (NR_040649, intron 3 of 3)	16737	NR_040649	73348	Mm.396218	NR_040649	ENSMUSG00000078492	1700045H11Rik	RIKEN cDNA 1700045H11 gene	ncRNA
chr11-5797	chr11	13632668	13637600	+	36.8	4932	Intergenic	Lx2B2|LINE|L1	964091	NR_045918	73307	Mm.399291	NR_045918	ENSMUSG00000085561	1700046C09Rik	RIKEN cDNA 1700046C09 gene	ncRNA
chr11-8568	chr11	13876595	13879898	+	26.2	3303	Intergenic	Intergenic	720979	NR_045918	73307	Mm.399291	NR_045918	ENSMUSG00000085561	1700046C09Rik	RIKEN cDNA 1700046C09 gene	ncRNA
chr11-8572	chr11	14260978	14264199	+	24.7	3221	Intergenic	Intergenic	336637	NR_045918	73307	Mm.399291	NR_045918	ENSMUSG00000085561	1700046C09Rik	RIKEN cDNA 1700046C09 gene	ncRNA
chr11-8567	chr11	13855385	13858852	+	23.6	3467	Intergenic	L1_Mus3|LINE|L1	742107	NR_045918	73307	Mm.399291	NR_045918	ENSMUSG00000085561	1700046C09Rik	RIKEN cDNA 1700046C09 gene	ncRNA
chr11-5809	chr11	14519845	14522556	+	22.3	2711	Intergenic	LTRIS_Mm|LTR|ERV1	78025	NR_045918	73307	Mm.399291	NR_045918	ENSMUSG00000085561	1700046C09Rik	RIKEN cDNA 1700046C09 gene	ncRNA
chr11-5810	chr11	14546953	14550385	+	22.3	3432	Intergenic	L1Md_F2|LINE|L1	50556	NR_045918	73307	Mm.399291	NR_045918	ENSMUSG00000085561	1700046C09Rik	RIKEN cDNA 1700046C09 gene	ncRNA
chr11-8559	chr11	13542232	13545175	+	22	2943	Intergenic	A-rich|Low_complexity|Low_complexity	1055522	NR_045918	73307	Mm.399291	NR_045918	ENSMUSG00000085561	1700046C09Rik	RIKEN cDNA 1700046C09 gene	ncRNA
chr11-6602	chr11	14422256	14425078	+	21.6	2822	Intergenic	L1_Mus3|LINE|L1	175558	NR_045918	73307	Mm.399291	NR_045918	ENSMUSG00000085561	1700046C09Rik	RIKEN cDNA 1700046C09 gene	ncRNA
chr11-2423	chr11	14572689	14575033	+	21.4	2344	intron (NR_045918, intron 3 of 3)	L1_Mus3|LINE|L1	25364	NR_045918	73307	Mm.399291	NR_045918	ENSMUSG00000085561	1700046C09Rik	RIKEN cDNA 1700046C09 gene	ncRNA
chr11-6606	chr11	14565516	14567955	+	18.9	2439	intron (NR_045918, intron 3 of 3)	MTA_Mm|LTR|ERVL-MaLR	32490	NR_045918	73307	Mm.399291	NR_045918	ENSMUSG00000085561	1700046C09Rik	RIKEN cDNA 1700046C09 gene	ncRNA
chr11-5807	chr11	14462175	14464163	+	17	1988	Intergenic	L1_Mus2|LINE|L1	136056	NR_045918	73307	Mm.399291	NR_045918	ENSMUSG00000085561	1700046C09Rik	RIKEN cDNA 1700046C09 gene	ncRNA
chr11-7527	chr11	13836708	13838419	+	14.3	1711	Intergenic	Intergenic	761662	NR_045918	73307	Mm.399291	NR_045918	ENSMUSG00000085561	1700046C09Rik	RIKEN cDNA 1700046C09 gene	ncRNA
chr11-5796	chr11	13555863	13557653	+	14.3	1790	Intergenic	Intergenic	1042467	NR_045918	73307	Mm.399291	NR_045918	ENSMUSG00000085561	1700046C09Rik	RIKEN cDNA 1700046C09 gene	ncRNA
chr11-6604	chr11	14444793	14446386	+	13.5	1593	Intergenic	Lx2A|LINE|L1	153636	NR_045918	73307	Mm.399291	NR_045918	ENSMUSG00000085561	1700046C09Rik	RIKEN cDNA 1700046C09 gene	ncRNA
chr11-3071	chr11	14500485	14502161	+	13.4	1676	Intergenic	L1VL4|LINE|L1	97902	NR_045918	73307	Mm.399291	NR_045918	ENSMUSG00000085561	1700046C09Rik	RIKEN cDNA 1700046C09 gene	ncRNA
chr11-982	chr11	13553097	13554347	+	13	1250	Intergenic	Intergenic	1045503	NR_045918	73307	Mm.399291	NR_045918	ENSMUSG00000085561	1700046C09Rik	RIKEN cDNA 1700046C09 gene	ncRNA
chr11-8570	chr11	13944276	13945942	+	12.8	1666	Intergenic	Intergenic	654116	NR_045918	73307	Mm.399291	NR_045918	ENSMUSG00000085561	1700046C09Rik	RIKEN cDNA 1700046C09 gene	ncRNA
chr11-8566	chr11	13765055	13766640	+	11.9	1585	Intergenic	Intergenic	833378	NR_045918	73307	Mm.399291	NR_045918	ENSMUSG00000085561	1700046C09Rik	RIKEN cDNA 1700046C09 gene	ncRNA
chr11-5133	chr11	13660878	13662152	+	10.8	1274	Intergenic	Intergenic	937710	NR_045918	73307	Mm.399291	NR_045918	ENSMUSG00000085561	1700046C09Rik	RIKEN cDNA 1700046C09 gene	ncRNA
chr11-6594	chr11	13623788	13625258	+	10.4	1470	Intergenic	Intergenic	974702	NR_045918	73307	Mm.399291	NR_045918	ENSMUSG00000085561	1700046C09Rik	RIKEN cDNA 1700046C09 gene	ncRNA
chr11-7529	chr11	13870380	13871741	+	10.3	1361	Intergenic	Intergenic	728165	NR_045918	73307	Mm.399291	NR_045918	ENSMUSG00000085561	1700046C09Rik	RIKEN cDNA 1700046C09 gene	ncRNA
chr11-5799	chr11	13671924	13673183	+	9.88	1259	Intergenic	Intergenic	926672	NR_045918	73307	Mm.399291	NR_045918	ENSMUSG00000085561	1700046C09Rik	RIKEN cDNA 1700046C09 gene	ncRNA
chr11-5806	chr11	14296327	14297327	+	8.6	1000	Intergenic	Intergenic	302398	NR_045918	73307	Mm.399291	NR_045918	ENSMUSG00000085561	1700046C09Rik	RIKEN cDNA 1700046C09 gene	ncRNA
chr11-5142	chr11	14589445	14590445	+	8.6	1000	intron (NR_045918, intron 1 of 3)	PB1D9|SINE|Alu	9280	NR_045918	73307	Mm.399291	NR_045918	ENSMUSG00000085561	1700046C09Rik	RIKEN cDNA 1700046C09 gene	ncRNA
chr11-5135	chr11	13774249	13775249	+	8.42	1000	Intergenic	Lx5|LINE|L1	824476	NR_045918	73307	Mm.399291	NR_045918	ENSMUSG00000085561	1700046C09Rik	RIKEN cDNA 1700046C09 gene	ncRNA
chr11-6596	chr11	13669103	13670103	+	8.42	1000	Intergenic	Intergenic	929622	NR_045918	73307	Mm.399291	NR_045918	ENSMUSG00000085561	1700046C09Rik	RIKEN cDNA 1700046C09 gene	ncRNA
chr11-5137	chr11	14091286	14092286	+	8.42	1000	Intergenic	Intergenic	507439	NR_045918	73307	Mm.399291	NR_045918	ENSMUSG00000085561	1700046C09Rik	RIKEN cDNA 1700046C09 gene	ncRNA
chr11-6603	chr11	14439573	14440573	+	8.42	1000	Intergenic	Intergenic	159152	NR_045918	73307	Mm.399291	NR_045918	ENSMUSG00000085561	1700046C09Rik	RIKEN cDNA 1700046C09 gene	ncRNA
chr11-5804	chr11	13939893	13940893	+	8.24	1000	Intergenic	Lx5|LINE|L1	658832	NR_045918	73307	Mm.399291	NR_045918	ENSMUSG00000085561	1700046C09Rik	RIKEN cDNA 1700046C09 gene	ncRNA
chr11-7524	chr11	13578605	13579605	+	8.05	1000	Intergenic	L1VL2|LINE|L1	1020120	NR_045918	73307	Mm.399291	NR_045918	ENSMUSG00000085561	1700046C09Rik	RIKEN cDNA 1700046C09 gene	ncRNA
chr11-7530	chr11	14312904	14313904	+	8.05	1000	Intergenic	ORR1C2|LTR|ERVL-MaLR	285821	NR_045918	73307	Mm.399291	NR_045918	ENSMUSG00000085561	1700046C09Rik	RIKEN cDNA 1700046C09 gene	ncRNA
chr11-7525	chr11	13590296	13591296	+	8.05	1000	Intergenic	Intergenic	1008429	NR_045918	73307	Mm.399291	NR_045918	ENSMUSG00000085561	1700046C09Rik	RIKEN cDNA 1700046C09 gene	ncRNA
chr11-8571	chr11	13991935	13992935	+	8.05	1000	Intergenic	Intergenic	606790	NR_045918	73307	Mm.399291	NR_045918	ENSMUSG00000085561	1700046C09Rik	RIKEN cDNA 1700046C09 gene	ncRNA
chr11-8573	chr11	14338530	14339530	+	7.87	1000	Intergenic	Intergenic	260195	NR_045918	73307	Mm.399291	NR_045918	ENSMUSG00000085561	1700046C09Rik	RIKEN cDNA 1700046C09 gene	ncRNA
chr11-6600	chr11	14132541	14133541	+	7.87	1000	Intergenic	L1_Mus2|LINE|L1	466184	NR_045918	73307	Mm.399291	NR_045918	ENSMUSG00000085561	1700046C09Rik	RIKEN cDNA 1700046C09 gene	ncRNA
chr11-8563	chr11	13596170	13597170	+	7.87	1000	Intergenic	Intergenic	1002555	NR_045918	73307	Mm.399291	NR_045918	ENSMUSG00000085561	1700046C09Rik	RIKEN cDNA 1700046C09 gene	ncRNA
chr11-8562	chr11	13571850	13572850	+	7.69	1000	Intergenic	Lx3C|LINE|L1	1026875	NR_045918	73307	Mm.399291	NR_045918	ENSMUSG00000085561	1700046C09Rik	RIKEN cDNA 1700046C09 gene	ncRNA
chr14-6493	chr14	44248428	44250477	+	16.5	2049	Intergenic	Intergenic	-36215	NR_073363	74328	Mm.439150	NR_073363		1700047E10Rik	RIKEN cDNA 1700047E10 gene	ncRNA
chr15-5565	chr15	11942936	11943936	+	8.24	1000	Intergenic	Intergenic	-23626	NR_040447	73339	Mm.231975	NR_040447		1700047G03Rik	RIKEN cDNA 1700047G03 gene	ncRNA
chr6-13492	chr6	147843981	147845818	+	15	1837	Intergenic	Intergenic	154658	NR_033636	100039727	Mm.396220	NR_033636	ENSMUSG00000085077	1700049E15Rik	RIKEN cDNA 1700049E15 gene	ncRNA
chr6-10840	chr6	100425916	100436072	+	84	10156	Intergenic	MTC|LTR|ERVL-MaLR	-96406	NR_040525	73395	Mm.69413	NR_040525		1700049E22Rik	RIKEN cDNA 1700049E22 gene	ncRNA
chr6-3230	chr6	100460050	100467326	+	61	7276	Intergenic	Intergenic	-63712	NR_040525	73395	Mm.69413	NR_040525		1700049E22Rik	RIKEN cDNA 1700049E22 gene	ncRNA
chr6-12762	chr6	100472951	100475984	+	22.3	3033	Intergenic	Intergenic	-52933	NR_040525	73395	Mm.69413	NR_040525		1700049E22Rik	RIKEN cDNA 1700049E22 gene	ncRNA
chr6-5422	chr6	100439620	100442010	+	20.3	2390	Intergenic	Intergenic	-86585	NR_040525	73395	Mm.69413	NR_040525		1700049E22Rik	RIKEN cDNA 1700049E22 gene	ncRNA
chr6-6435	chr6	100494443	100495993	+	12.8	1550	Intergenic	Intergenic	-32182	NR_040525	73395	Mm.69413	NR_040525		1700049E22Rik	RIKEN cDNA 1700049E22 gene	ncRNA
chr6-12761	chr6	100469706	100471218	+	12.3	1512	Intergenic	Intergenic	-56938	NR_040525	73395	Mm.69413	NR_040525		1700049E22Rik	RIKEN cDNA 1700049E22 gene	ncRNA
chr6-10842	chr6	100456241	100457241	+	8.24	1000	Intergenic	Intergenic	-70659	NR_040525	73395	Mm.69413	NR_040525		1700049E22Rik	RIKEN cDNA 1700049E22 gene	ncRNA
chr6-12764	chr6	100544169	100545169	+	8.05	1000	Intergenic	Intergenic	17269	NR_040525	73395	Mm.69413	NR_040525		1700049E22Rik	RIKEN cDNA 1700049E22 gene	ncRNA
chr7-10211	chr7	27942311	27945152	+	22.9	2841	Intergenic	RMER19B2|LTR|ERVK	-14301	NM_028538	73430	Mm.379224	NM_028538	ENSMUSG00000070709	1700049G17Rik	RIKEN cDNA 1700049G17 gene	protein-coding
chr10-8301	chr10	72053214	72061487	+	65.2	8273	Intergenic	Intergenic	-76660	NR_003644	108950	Mm.212793	NM_175390	ENSMUSG00000043859	1700049L16Rik	hematological and neurological expressed 1-like pseudogene	pseudo
chr10-8293	chr10	71834107	71841199	+	60.6	7092	Intergenic	Intergenic	143037	NR_003644	108950	Mm.212793	NM_175390	ENSMUSG00000043859	1700049L16Rik	hematological and neurological expressed 1-like pseudogene	pseudo
chr10-9777	chr10	72175047	72181904	+	53.3	6857	Intergenic	ORR1B2|LTR|ERVL-MaLR	-197785	NR_003644	108950	Mm.212793	NM_175390	ENSMUSG00000043859	1700049L16Rik	hematological and neurological expressed 1-like pseudogene	pseudo
chr10-7009	chr10	71698782	71704339	+	43.9	5557	Intergenic	B2_Mm2|SINE|B2	279130	NR_003644	108950	Mm.212793	NM_175390	ENSMUSG00000043859	1700049L16Rik	hematological and neurological expressed 1-like pseudogene	pseudo
chr10-9772	chr10	72112752	72117699	+	39	4947	Intergenic	Intergenic	-134535	NR_003644	108950	Mm.212793	NM_175390	ENSMUSG00000043859	1700049L16Rik	hematological and neurological expressed 1-like pseudogene	pseudo
chr10-4217	chr10	71825674	71829742	+	35.3	4068	Intergenic	Intergenic	152982	NR_003644	108950	Mm.212793	NM_175390	ENSMUSG00000043859	1700049L16Rik	hematological and neurological expressed 1-like pseudogene	pseudo
chr10-8297	chr10	71884316	71888708	+	34.6	4392	Intergenic	Intergenic	94178	NR_003644	108950	Mm.212793	NM_175390	ENSMUSG00000043859	1700049L16Rik	hematological and neurological expressed 1-like pseudogene	pseudo
chr10-8302	chr10	72122602	72126545	+	29.3	3943	Intergenic	Intergenic	-143883	NR_003644	108950	Mm.212793	NM_175390	ENSMUSG00000043859	1700049L16Rik	hematological and neurological expressed 1-like pseudogene	pseudo
chr10-8299	chr10	71996579	71999804	+	28	3225	Intergenic	Intergenic	-17501	NR_003644	108950	Mm.212793	NM_175390	ENSMUSG00000043859	1700049L16Rik	hematological and neurological expressed 1-like pseudogene	pseudo
chr10-3067	chr10	72140586	72143868	+	26.5	3282	Intergenic	(CAAA)n|Simple_repeat|Simple_repeat	-161537	NR_003644	108950	Mm.212793	NM_175390	ENSMUSG00000043859	1700049L16Rik	hematological and neurological expressed 1-like pseudogene	pseudo
chr10-7008	chr10	71686771	71689810	+	25.8	3039	Intergenic	Intergenic	292400	NR_003644	108950	Mm.212793	NM_175390	ENSMUSG00000043859	1700049L16Rik	hematological and neurological expressed 1-like pseudogene	pseudo
chr10-5915	chr10	72004616	72007102	+	20.7	2486	Intergenic	Intergenic	-25169	NR_003644	108950	Mm.212793	NM_175390	ENSMUSG00000043859	1700049L16Rik	hematological and neurological expressed 1-like pseudogene	pseudo
chr10-8303	chr10	72129539	72132161	+	20.5	2622	Intergenic	Intergenic	-150160	NR_003644	108950	Mm.212793	NM_175390	ENSMUSG00000043859	1700049L16Rik	hematological and neurological expressed 1-like pseudogene	pseudo
chr10-9764	chr10	71875974	71877920	+	17	1946	Intergenic	L1MC4a|LINE|L1	103743	NR_003644	108950	Mm.212793	NM_175390	ENSMUSG00000043859	1700049L16Rik	hematological and neurological expressed 1-like pseudogene	pseudo
chr10-3577	chr10	72265014	72266883	+	16.5	1869	Intergenic	Intergenic	-285258	NR_003644	108950	Mm.212793	NM_175390	ENSMUSG00000043859	1700049L16Rik	hematological and neurological expressed 1-like pseudogene	pseudo
chr10-8296	chr10	71880255	71882064	+	15.2	1809	Intergenic	Intergenic	99531	NR_003644	108950	Mm.212793	NM_175390	ENSMUSG00000043859	1700049L16Rik	hematological and neurological expressed 1-like pseudogene	pseudo
chr10-7019	chr10	72157287	72159052	+	14.3	1765	Intergenic	Intergenic	-177479	NR_003644	108950	Mm.212793	NM_175390	ENSMUSG00000043859	1700049L16Rik	hematological and neurological expressed 1-like pseudogene	pseudo
chr10-2590	chr10	72048549	72050143	+	13.9	1594	Intergenic	Intergenic	-68656	NR_003644	108950	Mm.212793	NM_175390	ENSMUSG00000043859	1700049L16Rik	hematological and neurological expressed 1-like pseudogene	pseudo
chr10-5020	chr10	72041282	72042749	+	11.7	1467	Intergenic	RMER15|LTR|ERVL	-61325	NR_003644	108950	Mm.212793	NM_175390	ENSMUSG00000043859	1700049L16Rik	hematological and neurological expressed 1-like pseudogene	pseudo
chr10-5029	chr10	72199937	72201381	+	11.7	1444	Intergenic	Intergenic	-219969	NR_003644	108950	Mm.212793	NM_175390	ENSMUSG00000043859	1700049L16Rik	hematological and neurological expressed 1-like pseudogene	pseudo
chr10-8307	chr10	72208321	72209660	+	11.3	1339	Intergenic	B3|SINE|B2	-228300	NR_003644	108950	Mm.212793	NM_175390	ENSMUSG00000043859	1700049L16Rik	hematological and neurological expressed 1-like pseudogene	pseudo
chr10-9758	chr10	71679346	71680718	+	11.2	1372	Intergenic	Lx8|LINE|L1	300658	NR_003644	108950	Mm.212793	NM_175390	ENSMUSG00000043859	1700049L16Rik	hematological and neurological expressed 1-like pseudogene	pseudo
chr10-5017	chr10	72001532	72002813	+	11	1281	Intergenic	Intergenic	-21482	NR_003644	108950	Mm.212793	NM_175390	ENSMUSG00000043859	1700049L16Rik	hematological and neurological expressed 1-like pseudogene	pseudo
chr10-8295	chr10	71872653	71873939	+	10.8	1286	Intergenic	Intergenic	107394	NR_003644	108950	Mm.212793	NM_175390	ENSMUSG00000043859	1700049L16Rik	hematological and neurological expressed 1-like pseudogene	pseudo
chr10-7014	chr10	72029511	72030805	+	10.4	1294	Intergenic	Intergenic	-49468	NR_003644	108950	Mm.212793	NM_175390	ENSMUSG00000043859	1700049L16Rik	hematological and neurological expressed 1-like pseudogene	pseudo
chr10-4218	chr10	71927773	71928773	+	8.97	1000	Intergenic	Intergenic	52417	NR_003644	108950	Mm.212793	NM_175390	ENSMUSG00000043859	1700049L16Rik	hematological and neurological expressed 1-like pseudogene	pseudo
chr10-3576	chr10	72235136	72236136	+	8.97	1000	Intergenic	RMER5|LTR|ERV1	-254946	NR_003644	108950	Mm.212793	NM_175390	ENSMUSG00000043859	1700049L16Rik	hematological and neurological expressed 1-like pseudogene	pseudo
chr10-5024	chr10	72104852	72105852	+	8.79	1000	Intergenic	Intergenic	-124662	NR_003644	108950	Mm.212793	NM_175390	ENSMUSG00000043859	1700049L16Rik	hematological and neurological expressed 1-like pseudogene	pseudo
chr10-5023	chr10	72080245	72081245	+	8.79	1000	Intergenic	Intergenic	-100055	NR_003644	108950	Mm.212793	NM_175390	ENSMUSG00000043859	1700049L16Rik	hematological and neurological expressed 1-like pseudogene	pseudo
chr10-5914	chr10	71987844	71988844	+	8.6	1000	Intergenic	Intergenic	-7654	NR_003644	108950	Mm.212793	NM_175390	ENSMUSG00000043859	1700049L16Rik	hematological and neurological expressed 1-like pseudogene	pseudo
chr10-7021	chr10	72227825	72228825	+	8.6	1000	Intergenic	Intergenic	-247635	NR_003644	108950	Mm.212793	NM_175390	ENSMUSG00000043859	1700049L16Rik	hematological and neurological expressed 1-like pseudogene	pseudo
chr10-7007	chr10	71673328	71674328	+	8.6	1000	Intergenic	Intergenic	306862	NR_003644	108950	Mm.212793	NM_175390	ENSMUSG00000043859	1700049L16Rik	hematological and neurological expressed 1-like pseudogene	pseudo
chr10-5917	chr10	72024631	72025631	+	8.6	1000	Intergenic	Intergenic	-44441	NR_003644	108950	Mm.212793	NM_175390	ENSMUSG00000043859	1700049L16Rik	hematological and neurological expressed 1-like pseudogene	pseudo
chr10-8298	chr10	71964269	71965269	+	8.6	1000	Intergenic	Intergenic	15921	NR_003644	108950	Mm.212793	NM_175390	ENSMUSG00000043859	1700049L16Rik	hematological and neurological expressed 1-like pseudogene	pseudo
chr10-7013	chr10	71983351	71984351	+	8.42	1000	Intergenic	L1M4|LINE|L1	-3161	NR_003644	108950	Mm.212793	NM_175390	ENSMUSG00000043859	1700049L16Rik	hematological and neurological expressed 1-like pseudogene	pseudo
chr10-4216	chr10	71767079	71768079	+	8.42	1000	Intergenic	Intergenic	213111	NR_003644	108950	Mm.212793	NM_175390	ENSMUSG00000043859	1700049L16Rik	hematological and neurological expressed 1-like pseudogene	pseudo
chr10-8292	chr10	71759792	71760792	+	8.42	1000	Intergenic	Intergenic	220398	NR_003644	108950	Mm.212793	NM_175390	ENSMUSG00000043859	1700049L16Rik	hematological and neurological expressed 1-like pseudogene	pseudo
chr10-9766	chr10	71990451	71991451	+	8.24	1000	Intergenic	Lx8b|LINE|L1	-10261	NR_003644	108950	Mm.212793	NM_175390	ENSMUSG00000043859	1700049L16Rik	hematological and neurological expressed 1-like pseudogene	pseudo
chr10-5913	chr10	71954176	71955176	+	8.24	1000	Intergenic	L2a|LINE|L2	26014	NR_003644	108950	Mm.212793	NM_175390	ENSMUSG00000043859	1700049L16Rik	hematological and neurological expressed 1-like pseudogene	pseudo
chr10-9765	chr10	71920717	71921717	+	8.05	1000	Intergenic	Lx2|LINE|L1	59473	NR_003644	108950	Mm.212793	NM_175390	ENSMUSG00000043859	1700049L16Rik	hematological and neurological expressed 1-like pseudogene	pseudo
chr10-7006	chr10	71664892	71665892	+	8.05	1000	Intergenic	Intergenic	315298	NR_003644	108950	Mm.212793	NM_175390	ENSMUSG00000043859	1700049L16Rik	hematological and neurological expressed 1-like pseudogene	pseudo
chr10-9780	chr10	72213706	72214706	+	7.87	1000	Intergenic	Intergenic	-233516	NR_003644	108950	Mm.212793	NM_175390	ENSMUSG00000043859	1700049L16Rik	hematological and neurological expressed 1-like pseudogene	pseudo
chr10-9771	chr10	72092207	72093207	+	7.87	1000	Intergenic	L1MB4|LINE|L1	-112017	NR_003644	108950	Mm.212793	NM_175390	ENSMUSG00000043859	1700049L16Rik	hematological and neurological expressed 1-like pseudogene	pseudo
chr10-9760	chr10	71805905	71806905	+	7.87	1000	Intergenic	Intergenic	174285	NR_003644	108950	Mm.212793	NM_175390	ENSMUSG00000043859	1700049L16Rik	hematological and neurological expressed 1-like pseudogene	pseudo
chr11-5319	chr11	72274531	72275531	+	8.79	1000	Intergenic	Intergenic	8187	NR_045922	73366	Mm.396157	NR_045922	ENSMUSG00000086951	1700051A21Rik	RIKEN cDNA 1700051A21 gene	ncRNA
chr6-9217	chr6	112215579	112220371	+	41.9	4792	Intergenic	Intergenic	7267	NR_027865	67336	Mm.378014	NR_027865		1700054K19Rik	RIKEN cDNA 1700054K19 gene	ncRNA
chr6-3862	chr6	111900185	111904409	+	36.1	4224	Intergenic	MTEb|LTR|ERVL-MaLR	-308411	NR_027865	67336	Mm.378014	NR_027865		1700054K19Rik	RIKEN cDNA 1700054K19 gene	ncRNA
chr6-12960	chr6	111891252	111895271	+	32.2	4019	Intergenic	Lx4A|LINE|L1	-317447	NR_027865	67336	Mm.378014	NR_027865		1700054K19Rik	RIKEN cDNA 1700054K19 gene	ncRNA
chr6-6512	chr6	111940392	111944109	+	29.7	3717	Intergenic	Intergenic	-268458	NR_027865	67336	Mm.378014	NR_027865		1700054K19Rik	RIKEN cDNA 1700054K19 gene	ncRNA
chr6-7748	chr6	111932090	111935325	+	26.9	3235	Intergenic	RMER6C|LTR|ERVK	-277001	NR_027865	67336	Mm.378014	NR_027865		1700054K19Rik	RIKEN cDNA 1700054K19 gene	ncRNA
chr6-2280	chr6	112235189	112237382	+	19.6	2193	Intergenic	Intergenic	25577	NR_027865	67336	Mm.378014	NR_027865		1700054K19Rik	RIKEN cDNA 1700054K19 gene	ncRNA
chr6-3265	chr6	112223348	112224607	+	11.3	1259	Intergenic	Intergenic	13269	NR_027865	67336	Mm.378014	NR_027865		1700054K19Rik	RIKEN cDNA 1700054K19 gene	ncRNA
chr6-3861	chr6	111694704	111695959	+	11	1255	Intergenic	L1_Mus3|LINE|L1	-515377	NR_027865	67336	Mm.378014	NR_027865		1700054K19Rik	RIKEN cDNA 1700054K19 gene	ncRNA
chr6-10997	chr6	112129337	112130649	+	10.4	1312	Intergenic	Intergenic	-80715	NR_027865	67336	Mm.378014	NR_027865		1700054K19Rik	RIKEN cDNA 1700054K19 gene	ncRNA
chr6-6513	chr6	112061822	112063188	+	10.3	1366	Intergenic	Intergenic	-148203	NR_027865	67336	Mm.378014	NR_027865		1700054K19Rik	RIKEN cDNA 1700054K19 gene	ncRNA
chr6-12962	chr6	111927510	111928852	+	9.88	1342	Intergenic	Intergenic	-282527	NR_027865	67336	Mm.378014	NR_027865		1700054K19Rik	RIKEN cDNA 1700054K19 gene	ncRNA
chr6-12966	chr6	112051860	112053144	+	9.15	1284	Intergenic	Intergenic	-158206	NR_027865	67336	Mm.378014	NR_027865		1700054K19Rik	RIKEN cDNA 1700054K19 gene	ncRNA
chr6-5479	chr6	111981585	111982585	+	8.42	1000	Intergenic	Intergenic	-228623	NR_027865	67336	Mm.378014	NR_027865		1700054K19Rik	RIKEN cDNA 1700054K19 gene	ncRNA
chr6-12958	chr6	111478415	111479415	+	8.24	1000	intron (NM_177328, intron 8 of 9)	L1_Mus3|LINE|L1	-731793	NR_027865	67336	Mm.378014	NR_027865		1700054K19Rik	RIKEN cDNA 1700054K19 gene	ncRNA
chr6-10996	chr6	112064879	112065879	+	8.24	1000	Intergenic	MLT1K|LTR|ERVL-MaLR	-145329	NR_027865	67336	Mm.378014	NR_027865		1700054K19Rik	RIKEN cDNA 1700054K19 gene	ncRNA
chr6-12965	chr6	112007397	112008397	+	8.05	1000	Intergenic	Intergenic	-202811	NR_027865	67336	Mm.378014	NR_027865		1700054K19Rik	RIKEN cDNA 1700054K19 gene	ncRNA
chr6-12959	chr6	111825476	111826476	+	8.05	1000	Intergenic	RMER2|LTR|ERV1	-384732	NR_027865	67336	Mm.378014	NR_027865		1700054K19Rik	RIKEN cDNA 1700054K19 gene	ncRNA
chr1-11783	chr1	183822193	183824068	+	15	1875	Intergenic	Intergenic	210868	NM_028516	73363	Mm.50115	NM_028516	ENSMUSG00000044854	1700056E22Rik	RIKEN cDNA 1700056E22 gene	protein-coding
chr1-11782	chr1	183737241	183738241	+	8.42	1000	Intergenic	Intergenic	296257	NM_028516	73363	Mm.50115	NM_028516	ENSMUSG00000044854	1700056E22Rik	RIKEN cDNA 1700056E22 gene	protein-coding
chr9-6525	chr9	92349788	92352922	+	22.9	3134	intron (NM_001033184, intron 4 of 6)	intron (NM_001033184, intron 4 of 6)	41978	NM_001033184	78459	Mm.179195	NM_001033184	ENSMUSG00000074139	1700057G04Rik	RIKEN cDNA 1700057G04 gene	protein-coding
chr9-5550	chr9	92302644	92303644	+	8.79	1000	Intergenic	Intergenic	-6233	NM_001033184	78459	Mm.179195	NM_001033184	ENSMUSG00000074139	1700057G04Rik	RIKEN cDNA 1700057G04 gene	protein-coding
chr4-5179	chr4	124346012	124347012	+	9.15	1000	Intergenic	Intergenic	139447	NR_040774	78460	Mm.452060	NR_040774		1700057H15Rik	RIKEN cDNA 1700057H15 gene	ncRNA
chr4-9378	chr4	124458197	124459197	+	8.42	1000	intron (NR_040774, intron 2 of 3)	ORR1E|LTR|ERVL-MaLR	27262	NR_040774	78460	Mm.452060	NR_040774		1700057H15Rik	RIKEN cDNA 1700057H15 gene	ncRNA
chr4-12738	chr4	124427804	124428804	+	7.5	1000	Intergenic	Intergenic	57655	NR_040774	78460	Mm.452060	NR_040774		1700057H15Rik	RIKEN cDNA 1700057H15 gene	ncRNA
chr6-13460	chr6	143461134	143464706	+	25.4	3572	Intergenic	Intergenic	188368	NR_045732	73425	Mm.417844	NR_045732	ENSMUSG00000086887	1700060C16Rik	RIKEN cDNA 1700060C16 gene	ncRNA
chr6-11407	chr6	143516407	143518901	+	20	2494	Intergenic	Intergenic	133634	NR_045732	73425	Mm.417844	NR_045732	ENSMUSG00000086887	1700060C16Rik	RIKEN cDNA 1700060C16 gene	ncRNA
chr6-2375	chr6	143501839	143503533	+	14.6	1694	Intergenic	Intergenic	148602	NR_045732	73425	Mm.417844	NR_045732	ENSMUSG00000086887	1700060C16Rik	RIKEN cDNA 1700060C16 gene	ncRNA
chr6-8075	chr6	143451572	143453176	+	13.7	1604	Intergenic	Intergenic	198914	NR_045732	73425	Mm.417844	NR_045732	ENSMUSG00000086887	1700060C16Rik	RIKEN cDNA 1700060C16 gene	ncRNA
chr6-13461	chr6	143498198	143499198	+	8.05	1000	Intergenic	Intergenic	152590	NR_045732	73425	Mm.417844	NR_045732	ENSMUSG00000086887	1700060C16Rik	RIKEN cDNA 1700060C16 gene	ncRNA
chr6-13462	chr6	143805480	143806480	+	7.87	1000	Intergenic	L1_Rod|LINE|L1	-154692	NR_045732	73425	Mm.417844	NR_045732	ENSMUSG00000086887	1700060C16Rik	RIKEN cDNA 1700060C16 gene	ncRNA
chr2-4947	chr2	9226529	9231025	+	35.9	4496	Intergenic	Lx|LINE|L1	39262	NR_038180	73438	Mm.23558	NR_038180	ENSMUSG00000085580	1700061F12Rik	RIKEN cDNA 1700061F12 gene	ncRNA
chr2-8151	chr2	8356976	8360738	+	30.9	3762	Intergenic	L1_Mus3|LINE|L1	-830658	NR_038180	73438	Mm.23558	NR_038180	ENSMUSG00000085580	1700061F12Rik	RIKEN cDNA 1700061F12 gene	ncRNA
chr2-4946	chr2	8588574	8592372	+	30.6	3798	Intergenic	RMER17A|LTR|ERVK	-599042	NR_038180	73438	Mm.23558	NR_038180	ENSMUSG00000085580	1700061F12Rik	RIKEN cDNA 1700061F12 gene	ncRNA
chr2-6912	chr2	8389947	8393953	+	28.9	4006	Intergenic	MLT1C|LTR|ERVL-MaLR	-797565	NR_038180	73438	Mm.23558	NR_038180	ENSMUSG00000085580	1700061F12Rik	RIKEN cDNA 1700061F12 gene	ncRNA
chr2-6914	chr2	8576342	8579086	+	23.4	2744	Intergenic	Intergenic	-611801	NR_038180	73438	Mm.23558	NR_038180	ENSMUSG00000085580	1700061F12Rik	RIKEN cDNA 1700061F12 gene	ncRNA
chr2-8154	chr2	8524962	8527654	+	22.3	2692	Intergenic	Intergenic	-663207	NR_038180	73438	Mm.23558	NR_038180	ENSMUSG00000085580	1700061F12Rik	RIKEN cDNA 1700061F12 gene	ncRNA
chr2-11192	chr2	9021418	9023640	+	18.3	2222	Intergenic	L1_Mus2|LINE|L1	-166986	NR_038180	73438	Mm.23558	NR_038180	ENSMUSG00000085580	1700061F12Rik	RIKEN cDNA 1700061F12 gene	ncRNA
chr2-4213	chr2	8650951	8653098	+	18.3	2147	Intergenic	L1VL1|LINE|L1	-537491	NR_038180	73438	Mm.23558	NR_038180	ENSMUSG00000085580	1700061F12Rik	RIKEN cDNA 1700061F12 gene	ncRNA
chr2-11190	chr2	9012119	9014585	+	18.3	2466	Intergenic	Intergenic	-176163	NR_038180	73438	Mm.23558	NR_038180	ENSMUSG00000085580	1700061F12Rik	RIKEN cDNA 1700061F12 gene	ncRNA
chr2-6915	chr2	8606951	8608790	+	14.8	1839	Intergenic	L1_Mus1|LINE|L1	-581645	NR_038180	73438	Mm.23558	NR_038180	ENSMUSG00000085580	1700061F12Rik	RIKEN cDNA 1700061F12 gene	ncRNA
chr2-6910	chr2	8301005	8302641	+	14.1	1636	Intergenic	RLTR11B|LTR|ERVK	-887692	NR_038180	73438	Mm.23558	NR_038180	ENSMUSG00000085580	1700061F12Rik	RIKEN cDNA 1700061F12 gene	ncRNA
chr2-11193	chr2	9094994	9096586	+	13.7	1592	Intergenic	Intergenic	-93725	NR_038180	73438	Mm.23558	NR_038180	ENSMUSG00000085580	1700061F12Rik	RIKEN cDNA 1700061F12 gene	ncRNA
chr2-5870	chr2	9233593	9235106	+	13.5	1513	Intergenic	Intergenic	44834	NR_038180	73438	Mm.23558	NR_038180	ENSMUSG00000085580	1700061F12Rik	RIKEN cDNA 1700061F12 gene	ncRNA
chr2-3582	chr2	8440621	8442161	+	12.8	1540	Intergenic	Intergenic	-748124	NR_038180	73438	Mm.23558	NR_038180	ENSMUSG00000085580	1700061F12Rik	RIKEN cDNA 1700061F12 gene	ncRNA
chr2-11185	chr2	8569288	8570854	+	12.6	1566	Intergenic	L1_Mus4|LINE|L1	-619444	NR_038180	73438	Mm.23558	NR_038180	ENSMUSG00000085580	1700061F12Rik	RIKEN cDNA 1700061F12 gene	ncRNA
chr2-11179	chr2	8379825	8381351	+	12.3	1526	Intergenic	Intergenic	-808927	NR_038180	73438	Mm.23558	NR_038180	ENSMUSG00000085580	1700061F12Rik	RIKEN cDNA 1700061F12 gene	ncRNA
chr2-8156	chr2	8535908	8537235	+	11.2	1327	Intergenic	Intergenic	-652944	NR_038180	73438	Mm.23558	NR_038180	ENSMUSG00000085580	1700061F12Rik	RIKEN cDNA 1700061F12 gene	ncRNA
chr2-4942	chr2	8550276	8551575	+	11	1299	Intergenic	Lx4A|LINE|L1	-638590	NR_038180	73438	Mm.23558	NR_038180	ENSMUSG00000085580	1700061F12Rik	RIKEN cDNA 1700061F12 gene	ncRNA
chr2-11183	chr2	8411724	8413030	+	10.3	1306	Intergenic	L1_Mus3|LINE|L1	-777138	NR_038180	73438	Mm.23558	NR_038180	ENSMUSG00000085580	1700061F12Rik	RIKEN cDNA 1700061F12 gene	ncRNA
chr2-5869	chr2	9100890	9102249	+	9.88	1359	Intergenic	B4A|SINE|B4	-87946	NR_038180	73438	Mm.23558	NR_038180	ENSMUSG00000085580	1700061F12Rik	RIKEN cDNA 1700061F12 gene	ncRNA
chr2-5865	chr2	8386227	8387227	+	8.97	1000	Intergenic	Intergenic	-802788	NR_038180	73438	Mm.23558	NR_038180	ENSMUSG00000085580	1700061F12Rik	RIKEN cDNA 1700061F12 gene	ncRNA
chr2-5866	chr2	8513729	8514729	+	8.6	1000	Intergenic	Intergenic	-675286	NR_038180	73438	Mm.23558	NR_038180	ENSMUSG00000085580	1700061F12Rik	RIKEN cDNA 1700061F12 gene	ncRNA
chr2-6911	chr2	8307766	8308766	+	8.6	1000	Intergenic	Lx7|LINE|L1	-881249	NR_038180	73438	Mm.23558	NR_038180	ENSMUSG00000085580	1700061F12Rik	RIKEN cDNA 1700061F12 gene	ncRNA
chr2-5864	chr2	8297678	8298678	+	8.6	1000	Intergenic	Intergenic	-891337	NR_038180	73438	Mm.23558	NR_038180	ENSMUSG00000085580	1700061F12Rik	RIKEN cDNA 1700061F12 gene	ncRNA
chr2-4940	chr2	8305228	8306228	+	8.6	1000	Intergenic	Intergenic	-883787	NR_038180	73438	Mm.23558	NR_038180	ENSMUSG00000085580	1700061F12Rik	RIKEN cDNA 1700061F12 gene	ncRNA
chr2-8152	chr2	8365407	8366407	+	8.24	1000	Intergenic	MT2C_Mm|LTR|ERVL	-823608	NR_038180	73438	Mm.23558	NR_038180	ENSMUSG00000085580	1700061F12Rik	RIKEN cDNA 1700061F12 gene	ncRNA
chr2-11189	chr2	8754007	8755007	+	8.24	1000	Intergenic	Intergenic	-435008	NR_038180	73438	Mm.23558	NR_038180	ENSMUSG00000085580	1700061F12Rik	RIKEN cDNA 1700061F12 gene	ncRNA
chr2-9556	chr2	9243724	9244724	+	8.05	1000	Intergenic	Intergenic	54709	NR_038180	73438	Mm.23558	NR_038180	ENSMUSG00000085580	1700061F12Rik	RIKEN cDNA 1700061F12 gene	ncRNA
chr2-11182	chr2	8407892	8408892	+	8.05	1000	Intergenic	L1VL4|LINE|L1	-781123	NR_038180	73438	Mm.23558	NR_038180	ENSMUSG00000085580	1700061F12Rik	RIKEN cDNA 1700061F12 gene	ncRNA
chr2-9552	chr2	8867308	8868308	+	8.05	1000	Intergenic	Intergenic	-321707	NR_038180	73438	Mm.23558	NR_038180	ENSMUSG00000085580	1700061F12Rik	RIKEN cDNA 1700061F12 gene	ncRNA
chr2-11187	chr2	8646249	8647249	+	8.05	1000	Intergenic	L1MB8|LINE|L1	-542766	NR_038180	73438	Mm.23558	NR_038180	ENSMUSG00000085580	1700061F12Rik	RIKEN cDNA 1700061F12 gene	ncRNA
chr2-11186	chr2	8582055	8583055	+	7.69	1000	Intergenic	L1_Mus1|LINE|L1	-606960	NR_038180	73438	Mm.23558	NR_038180	ENSMUSG00000085580	1700061F12Rik	RIKEN cDNA 1700061F12 gene	ncRNA
chr2-9546	chr2	8562602	8563602	+	7.69	1000	Intergenic	Intergenic	-626413	NR_038180	73438	Mm.23558	NR_038180	ENSMUSG00000085580	1700061F12Rik	RIKEN cDNA 1700061F12 gene	ncRNA
chr2-11195	chr2	9266385	9267385	+	7.69	1000	Intergenic	Intergenic	77370	NR_038180	73438	Mm.23558	NR_038180	ENSMUSG00000085580	1700061F12Rik	RIKEN cDNA 1700061F12 gene	ncRNA
chr2-11181	chr2	8403157	8404157	+	7.69	1000	Intergenic	MMERVK10D3_I-int|LTR|ERVK	-785858	NR_038180	73438	Mm.23558	NR_038180	ENSMUSG00000085580	1700061F12Rik	RIKEN cDNA 1700061F12 gene	ncRNA
chr2-9553	chr2	8973882	8974882	+	7.69	1000	Intergenic	Intergenic	-215133	NR_038180	73438	Mm.23558	NR_038180	ENSMUSG00000085580	1700061F12Rik	RIKEN cDNA 1700061F12 gene	ncRNA
chr2-11184	chr2	8539115	8540115	+	7.69	1000	Intergenic	Intergenic	-649900	NR_038180	73438	Mm.23558	NR_038180	ENSMUSG00000085580	1700061F12Rik	RIKEN cDNA 1700061F12 gene	ncRNA
chr2-11177	chr2	8336501	8337501	+	7.69	1000	Intergenic	Intergenic	-852514	NR_038180	73438	Mm.23558	NR_038180	ENSMUSG00000085580	1700061F12Rik	RIKEN cDNA 1700061F12 gene	ncRNA
chr3-15430	chr3	117193098	117195883	+	22.7	2785	Intergenic	MTEa|LTR|ERVL-MaLR	-116725	NR_038029	433646	Mm.158997	NR_038029	ENSMUSG00000028009	1700061I17Rik	RIKEN cDNA 1700061I17 gene	ncRNA
chr3-13003	chr3	117213584	117214975	+	11.5	1391	Intergenic	L1_Mus1|LINE|L1	-136514	NR_038029	433646	Mm.158997	NR_038029	ENSMUSG00000028009	1700061I17Rik	RIKEN cDNA 1700061I17 gene	ncRNA
chr3-10940	chr3	117197580	117198908	+	9.88	1328	Intergenic	MLTR18A_MM|LTR|ERVK	-120479	NR_038029	433646	Mm.158997	NR_038029	ENSMUSG00000028009	1700061I17Rik	RIKEN cDNA 1700061I17 gene	ncRNA
chr1-6552	chr1	95932078	95935648	+	25.4	3570	Intergenic	Lx3C|LINE|L1	87895	NR_040467	73454	Mm.396229	NR_040467		1700063A18Rik	RIKEN cDNA 1700063A18 gene	ncRNA
chr1-6553	chr1	96179432	96182521	+	23.1	3089	Intergenic	L1VL2|LINE|L1	-159218	NR_040467	73454	Mm.396229	NR_040467		1700063A18Rik	RIKEN cDNA 1700063A18 gene	ncRNA
chr1-2339	chr1	96336536	96338606	+	19.8	2070	Intergenic	Intergenic	-315813	NR_040467	73454	Mm.396229	NR_040467		1700063A18Rik	RIKEN cDNA 1700063A18 gene	ncRNA
chr1-15053	chr1	96085885	96087814	+	15.4	1929	Intergenic	L1_Mus3|LINE|L1	-65091	NR_040467	73454	Mm.396229	NR_040467		1700063A18Rik	RIKEN cDNA 1700063A18 gene	ncRNA
chr1-7746	chr1	95925016	95926688	+	14.1	1672	Intergenic	Lx8b|LINE|L1	95906	NR_040467	73454	Mm.396229	NR_040467		1700063A18Rik	RIKEN cDNA 1700063A18 gene	ncRNA
chr1-3507	chr1	96169008	96170358	+	11.7	1350	Intergenic	Intergenic	-147925	NR_040467	73454	Mm.396229	NR_040467		1700063A18Rik	RIKEN cDNA 1700063A18 gene	ncRNA
chr1-12762	chr1	95869076	95870374	+	10.8	1298	Intergenic	Intergenic	152033	NR_040467	73454	Mm.396229	NR_040467		1700063A18Rik	RIKEN cDNA 1700063A18 gene	ncRNA
chr1-7748	chr1	96079717	96080995	+	10.4	1278	Intergenic	Intergenic	-58598	NR_040467	73454	Mm.396229	NR_040467		1700063A18Rik	RIKEN cDNA 1700063A18 gene	ncRNA
chr1-7749	chr1	96153219	96154470	+	10.4	1251	Intergenic	Intergenic	-132086	NR_040467	73454	Mm.396229	NR_040467		1700063A18Rik	RIKEN cDNA 1700063A18 gene	ncRNA
chr1-10797	chr1	96146446	96147446	+	8.6	1000	Intergenic	Lx5c|LINE|L1	-125188	NR_040467	73454	Mm.396229	NR_040467		1700063A18Rik	RIKEN cDNA 1700063A18 gene	ncRNA
chr1-9107	chr1	96066988	96067988	+	8.6	1000	Intergenic	Lx9|LINE|L1	-45730	NR_040467	73454	Mm.396229	NR_040467		1700063A18Rik	RIKEN cDNA 1700063A18 gene	ncRNA
chr1-9108	chr1	96071421	96072421	+	8.42	1000	Intergenic	L1_Rod|LINE|L1	-50163	NR_040467	73454	Mm.396229	NR_040467		1700063A18Rik	RIKEN cDNA 1700063A18 gene	ncRNA
chr1-15059	chr1	96306557	96307557	+	8.24	1000	Intergenic	RLTR21|LTR|ERVK	-285299	NR_040467	73454	Mm.396229	NR_040467		1700063A18Rik	RIKEN cDNA 1700063A18 gene	ncRNA
chr1-15057	chr1	96247170	96248170	+	8.24	1000	Intergenic	RMER19C|LTR|ERVK	-225912	NR_040467	73454	Mm.396229	NR_040467		1700063A18Rik	RIKEN cDNA 1700063A18 gene	ncRNA
chr1-10798	chr1	96216451	96217451	+	8.24	1000	Intergenic	Lx7|LINE|L1	-195193	NR_040467	73454	Mm.396229	NR_040467		1700063A18Rik	RIKEN cDNA 1700063A18 gene	ncRNA
chr1-12763	chr1	95928742	95929742	+	8.05	1000	Intergenic	Intergenic	92516	NR_040467	73454	Mm.396229	NR_040467		1700063A18Rik	RIKEN cDNA 1700063A18 gene	ncRNA
chr1-15055	chr1	96091690	96092690	+	8.05	1000	Intergenic	(CA)n|Simple_repeat|Simple_repeat	-70432	NR_040467	73454	Mm.396229	NR_040467		1700063A18Rik	RIKEN cDNA 1700063A18 gene	ncRNA
chr1-15048	chr1	95988208	95989208	+	8.05	1000	Intergenic	Intergenic	33050	NR_040467	73454	Mm.396229	NR_040467		1700063A18Rik	RIKEN cDNA 1700063A18 gene	ncRNA
chr1-12764	chr1	96102117	96103117	+	8.05	1000	Intergenic	L1_Mus3|LINE|L1	-80859	NR_040467	73454	Mm.396229	NR_040467		1700063A18Rik	RIKEN cDNA 1700063A18 gene	ncRNA
chr1-15049	chr1	96026382	96027382	+	8.05	1000	Intergenic	Intergenic	-5124	NR_040467	73454	Mm.396229	NR_040467		1700063A18Rik	RIKEN cDNA 1700063A18 gene	ncRNA
chr1-15050	chr1	96030140	96031140	+	7.87	1000	Intergenic	Intergenic	-8882	NR_040467	73454	Mm.396229	NR_040467		1700063A18Rik	RIKEN cDNA 1700063A18 gene	ncRNA
chr1-15051	chr1	96048489	96049489	+	7.87	1000	Intergenic	BGLII_B|LTR|ERVK	-27231	NR_040467	73454	Mm.396229	NR_040467		1700063A18Rik	RIKEN cDNA 1700063A18 gene	ncRNA
chr1-15058	chr1	96251491	96252491	+	7.69	1000	Intergenic	Intergenic	-230233	NR_040467	73454	Mm.396229	NR_040467		1700063A18Rik	RIKEN cDNA 1700063A18 gene	ncRNA
chr1-15056	chr1	96149521	96150521	+	7.5	1000	Intergenic	L1_Mus3|LINE|L1	-128263	NR_040467	73454	Mm.396229	NR_040467		1700063A18Rik	RIKEN cDNA 1700063A18 gene	ncRNA
chr9-5313	chr9	41251534	41254932	+	25.4	3398	Intergenic	RLTR20B2|LTR|ERVK	47078	NR_040392	78500	Mm.275715	NR_040392		1700063D05Rik	RIKEN cDNA 1700063D05 gene	ncRNA
chr5-13271	chr5	91824819	91825819	+	8.24	1000	Intergenic	Intergenic	-58019	NR_045383	73452	Mm.396233	NR_045383		1700063O14Rik	RIKEN cDNA 1700063O14 gene	ncRNA
chr5-13270	chr5	91691964	91692964	+	7.87	1000	Intergenic	Intergenic	74836	NR_045383	73452	Mm.396233	NR_045383		1700063O14Rik	RIKEN cDNA 1700063O14 gene	ncRNA
chr10-10410	chr10	119051177	119053575	+	20	2398	Intergenic	RSINE1|SINE|B4	-40529	NR_045348	73400	Mm.416864	NR_045348		1700064J06Rik	RIKEN cDNA 1700064J06 gene	ncRNA
chr12-5587	chr12	99567298	99572889	+	42.6	5591	Intergenic	Intergenic	57881	NR_045288	73457	Mm.383439	NR_045288		1700064M15Rik	RIKEN cDNA 1700064M15 gene	ncRNA
chr12-4678	chr12	99614345	99618029	+	26.7	3684	Intergenic	Intergenic	11787	NR_045288	73457	Mm.383439	NR_045288		1700064M15Rik	RIKEN cDNA 1700064M15 gene	ncRNA
chr12-3237	chr12	99601701	99603158	+	11.3	1457	Intergenic	Intergenic	25545	NR_045288	73457	Mm.383439	NR_045288		1700064M15Rik	RIKEN cDNA 1700064M15 gene	ncRNA
chr12-1599	chr12	99607670	99608926	+	11.2	1256	Intergenic	Intergenic	19676	NR_045288	73457	Mm.383439	NR_045288		1700064M15Rik	RIKEN cDNA 1700064M15 gene	ncRNA
chr6-3011	chr6	35397626	35398978	+	11.7	1352	Intergenic	Intergenic	67456	NR_040526	73409	Mm.69443	NR_040526		1700065J11Rik	RIKEN cDNA 1700065J11 gene	ncRNA
chr6-10151	chr6	35383167	35384167	+	8.24	1000	Intergenic	Intergenic	52821	NR_040526	73409	Mm.69443	NR_040526		1700065J11Rik	RIKEN cDNA 1700065J11 gene	ncRNA
chr6-5278	chr6	73487118	73493157	+	50.5	6039	Intergenic	Intergenic	-19116	NR_108032	73408	Mm.233629	NR_108032		1700065L07Rik	RIKEN cDNA 1700065L07 gene	ncRNA
chr6-3143	chr6	73961654	73967216	+	42.5	5562	Intergenic	Intergenic	-493414	NR_108032	73408	Mm.233629	NR_108032		1700065L07Rik	RIKEN cDNA 1700065L07 gene	ncRNA
chr6-10618	chr6	74174128	74178601	+	35.3	4473	Intergenic	L1Md_F2|LINE|L1	-705343	NR_108032	73408	Mm.233629	NR_108032		1700065L07Rik	RIKEN cDNA 1700065L07 gene	ncRNA
chr6-6286	chr6	74092695	74096483	+	28.6	3788	Intergenic	Intergenic	-623568	NR_108032	73408	Mm.233629	NR_108032		1700065L07Rik	RIKEN cDNA 1700065L07 gene	ncRNA
chr6-8875	chr6	73907571	73911275	+	28	3704	Intergenic	Intergenic	-438402	NR_108032	73408	Mm.233629	NR_108032		1700065L07Rik	RIKEN cDNA 1700065L07 gene	ncRNA
chr6-3728	chr6	75049570	75053020	+	27.6	3450	Intergenic	RMER15|LTR|ERVL	-1580274	NR_108032	73408	Mm.233629	NR_108032		1700065L07Rik	RIKEN cDNA 1700065L07 gene	ncRNA
chr6-8885	chr6	74453540	74456879	+	25.6	3339	Intergenic	Lx2|LINE|L1	-984188	NR_108032	73408	Mm.233629	NR_108032		1700065L07Rik	RIKEN cDNA 1700065L07 gene	ncRNA
chr6-12502	chr6	74587378	74590379	+	23.2	3001	Intergenic	ORR1F|LTR|ERVL-MaLR	-1117857	NR_108032	73408	Mm.233629	NR_108032		1700065L07Rik	RIKEN cDNA 1700065L07 gene	ncRNA
chr6-7492	chr6	74710646	74713440	+	23.1	2794	Intergenic	Lx8|LINE|L1	-1241022	NR_108032	73408	Mm.233629	NR_108032		1700065L07Rik	RIKEN cDNA 1700065L07 gene	ncRNA
chr6-8894	chr6	75075255	75077750	+	21.2	2495	Intergenic	L1_Mus3|LINE|L1	-1605481	NR_108032	73408	Mm.233629	NR_108032		1700065L07Rik	RIKEN cDNA 1700065L07 gene	ncRNA
chr6-4457	chr6	74359995	74362470	+	21	2475	Intergenic	Intergenic	-890211	NR_108032	73408	Mm.233629	NR_108032		1700065L07Rik	RIKEN cDNA 1700065L07 gene	ncRNA
chr6-10634	chr6	75228591	75231313	+	20.7	2722	Intergenic	Lx3_Mus|LINE|L1	-1758931	NR_108032	73408	Mm.233629	NR_108032		1700065L07Rik	RIKEN cDNA 1700065L07 gene	ncRNA
chr6-12510	chr6	74932187	74934634	+	20.5	2447	Intergenic	L1VL2|LINE|L1	-1462389	NR_108032	73408	Mm.233629	NR_108032		1700065L07Rik	RIKEN cDNA 1700065L07 gene	ncRNA
chr6-12476	chr6	73498854	73501528	+	19.2	2674	Intergenic	Lx5|LINE|L1	-29170	NR_108032	73408	Mm.233629	NR_108032		1700065L07Rik	RIKEN cDNA 1700065L07 gene	ncRNA
chr6-7485	chr6	74120806	74123216	+	19.2	2410	Intergenic	Intergenic	-650990	NR_108032	73408	Mm.233629	NR_108032		1700065L07Rik	RIKEN cDNA 1700065L07 gene	ncRNA
chr6-10627	chr6	74919254	74921541	+	18.9	2287	Intergenic	RLTR22_Mur|LTR|ERVK	-1449376	NR_108032	73408	Mm.233629	NR_108032		1700065L07Rik	RIKEN cDNA 1700065L07 gene	ncRNA
chr6-5290	chr6	74888348	74890466	+	18.5	2118	Intergenic	MTEa|LTR|ERVL-MaLR	-1418386	NR_108032	73408	Mm.233629	NR_108032		1700065L07Rik	RIKEN cDNA 1700065L07 gene	ncRNA
chr6-6292	chr6	74914481	74916237	+	14.3	1756	Intergenic	Lx2|LINE|L1	-1444338	NR_108032	73408	Mm.233629	NR_108032		1700065L07Rik	RIKEN cDNA 1700065L07 gene	ncRNA
chr6-10623	chr6	74389457	74391074	+	14.1	1617	Intergenic	Lx4B|LINE|L1	-919244	NR_108032	73408	Mm.233629	NR_108032		1700065L07Rik	RIKEN cDNA 1700065L07 gene	ncRNA
chr6-6284	chr6	73555415	73557085	+	13.7	1670	Intergenic	L1_Mus3|LINE|L1	-85229	NR_108032	73408	Mm.233629	NR_108032		1700065L07Rik	RIKEN cDNA 1700065L07 gene	ncRNA
chr6-6289	chr6	74199198	74200910	+	13.7	1712	Intergenic	L1MB4|LINE|L1	-729033	NR_108032	73408	Mm.233629	NR_108032		1700065L07Rik	RIKEN cDNA 1700065L07 gene	ncRNA
chr6-7486	chr6	74156167	74157726	+	13.2	1559	Intergenic	Lx9|LINE|L1	-685925	NR_108032	73408	Mm.233629	NR_108032		1700065L07Rik	RIKEN cDNA 1700065L07 gene	ncRNA
chr6-12481	chr6	73607584	73609124	+	12.8	1540	Intergenic	RMER17A|LTR|ERVK	-137333	NR_108032	73408	Mm.233629	NR_108032		1700065L07Rik	RIKEN cDNA 1700065L07 gene	ncRNA
chr6-10612	chr6	73688850	73690467	+	12.8	1617	Intergenic	RMER3D-int|LTR|ERVK	-218637	NR_108032	73408	Mm.233629	NR_108032		1700065L07Rik	RIKEN cDNA 1700065L07 gene	ncRNA
chr6-6290	chr6	74435410	74436768	+	11.7	1358	Intergenic	Intergenic	-965068	NR_108032	73408	Mm.233629	NR_108032		1700065L07Rik	RIKEN cDNA 1700065L07 gene	ncRNA
chr6-4463	chr6	75087252	75088613	+	11.7	1361	Intergenic	Lx3A|LINE|L1	-1616911	NR_108032	73408	Mm.233629	NR_108032		1700065L07Rik	RIKEN cDNA 1700065L07 gene	ncRNA
chr6-5287	chr6	74604101	74605544	+	11.5	1443	Intergenic	Intergenic	-1133801	NR_108032	73408	Mm.233629	NR_108032		1700065L07Rik	RIKEN cDNA 1700065L07 gene	ncRNA
chr6-5292	chr6	75106669	75108090	+	11.5	1421	Intergenic	L1_Mus3|LINE|L1	-1636358	NR_108032	73408	Mm.233629	NR_108032		1700065L07Rik	RIKEN cDNA 1700065L07 gene	ncRNA
chr6-12483	chr6	73853524	73854985	+	11.5	1461	Intergenic	Intergenic	-383233	NR_108032	73408	Mm.233629	NR_108032		1700065L07Rik	RIKEN cDNA 1700065L07 gene	ncRNA
chr6-7498	chr6	75173611	75174873	+	11.3	1262	Intergenic	Intergenic	-1703221	NR_108032	73408	Mm.233629	NR_108032		1700065L07Rik	RIKEN cDNA 1700065L07 gene	ncRNA
chr6-8891	chr6	74870296	74871610	+	11.2	1314	Intergenic	Intergenic	-1399932	NR_108032	73408	Mm.233629	NR_108032		1700065L07Rik	RIKEN cDNA 1700065L07 gene	ncRNA
chr6-7497	chr6	75134272	75135745	+	11	1473	Intergenic	L1Md_F2|LINE|L1	-1663987	NR_108032	73408	Mm.233629	NR_108032		1700065L07Rik	RIKEN cDNA 1700065L07 gene	ncRNA
chr6-8895	chr6	75324204	75325501	+	10.8	1297	Intergenic	Intergenic	-1853831	NR_108032	73408	Mm.233629	NR_108032		1700065L07Rik	RIKEN cDNA 1700065L07 gene	ncRNA
chr6-8890	chr6	74858461	74859745	+	10.4	1284	Intergenic	L1MA9|LINE|L1	-1388082	NR_108032	73408	Mm.233629	NR_108032		1700065L07Rik	RIKEN cDNA 1700065L07 gene	ncRNA
chr6-12485	chr6	73902105	73903414	+	10.3	1309	Intergenic	L1VL4|LINE|L1	-431738	NR_108032	73408	Mm.233629	NR_108032		1700065L07Rik	RIKEN cDNA 1700065L07 gene	ncRNA
chr6-12495	chr6	74227959	74229331	+	10.3	1372	Intergenic	L1_Mus3|LINE|L1	-757624	NR_108032	73408	Mm.233629	NR_108032		1700065L07Rik	RIKEN cDNA 1700065L07 gene	ncRNA
chr6-6285	chr6	73709124	73710519	+	10.3	1395	Intergenic	Intergenic	-238800	NR_108032	73408	Mm.233629	NR_108032		1700065L07Rik	RIKEN cDNA 1700065L07 gene	ncRNA
chr6-7481	chr6	73877766	73879038	+	10.1	1272	Intergenic	RMER5|LTR|ERV1	-407381	NR_108032	73408	Mm.233629	NR_108032		1700065L07Rik	RIKEN cDNA 1700065L07 gene	ncRNA
chr6-5295	chr6	75187031	75188335	+	10.1	1304	Intergenic	Intergenic	-1716662	NR_108032	73408	Mm.233629	NR_108032		1700065L07Rik	RIKEN cDNA 1700065L07 gene	ncRNA
chr6-7483	chr6	74066774	74068054	+	10.1	1280	Intergenic	Intergenic	-596393	NR_108032	73408	Mm.233629	NR_108032		1700065L07Rik	RIKEN cDNA 1700065L07 gene	ncRNA
chr6-10616	chr6	73953605	73954869	+	9.88	1264	Intergenic	Intergenic	-483216	NR_108032	73408	Mm.233629	NR_108032		1700065L07Rik	RIKEN cDNA 1700065L07 gene	ncRNA
chr6-10625	chr6	74675954	74677206	+	9.7	1252	Intergenic	Intergenic	-1205559	NR_108032	73408	Mm.233629	NR_108032		1700065L07Rik	RIKEN cDNA 1700065L07 gene	ncRNA
chr6-3142	chr6	73920739	73921739	+	9.33	1000	Intergenic	Lx4A|LINE|L1	-450218	NR_108032	73408	Mm.233629	NR_108032		1700065L07Rik	RIKEN cDNA 1700065L07 gene	ncRNA
chr6-5284	chr6	74165018	74166018	+	9.15	1000	Intergenic	MTD|LTR|ERVL-MaLR	-694497	NR_108032	73408	Mm.233629	NR_108032		1700065L07Rik	RIKEN cDNA 1700065L07 gene	ncRNA
chr6-6288	chr6	74153204	74154204	+	8.97	1000	Intergenic	Intergenic	-682683	NR_108032	73408	Mm.233629	NR_108032		1700065L07Rik	RIKEN cDNA 1700065L07 gene	ncRNA
chr6-5286	chr6	74399499	74400499	+	8.97	1000	Intergenic	Intergenic	-928978	NR_108032	73408	Mm.233629	NR_108032		1700065L07Rik	RIKEN cDNA 1700065L07 gene	ncRNA
chr6-5289	chr6	74808313	74809313	+	8.97	1000	Intergenic	Lx5|LINE|L1	-1337792	NR_108032	73408	Mm.233629	NR_108032		1700065L07Rik	RIKEN cDNA 1700065L07 gene	ncRNA
chr6-7490	chr6	74480365	74481365	+	8.79	1000	Intergenic	Intergenic	-1009844	NR_108032	73408	Mm.233629	NR_108032		1700065L07Rik	RIKEN cDNA 1700065L07 gene	ncRNA
chr6-5283	chr6	74081657	74082657	+	8.79	1000	Intergenic	Intergenic	-611136	NR_108032	73408	Mm.233629	NR_108032		1700065L07Rik	RIKEN cDNA 1700065L07 gene	ncRNA
chr6-5294	chr6	75138567	75139567	+	8.79	1000	Intergenic	Lx3A|LINE|L1	-1668046	NR_108032	73408	Mm.233629	NR_108032		1700065L07Rik	RIKEN cDNA 1700065L07 gene	ncRNA
chr6-6287	chr6	74138729	74139729	+	8.79	1000	Intergenic	L1Md_F2|LINE|L1	-668208	NR_108032	73408	Mm.233629	NR_108032		1700065L07Rik	RIKEN cDNA 1700065L07 gene	ncRNA
chr6-7491	chr6	74573459	74574459	+	8.6	1000	Intergenic	Intergenic	-1102938	NR_108032	73408	Mm.233629	NR_108032		1700065L07Rik	RIKEN cDNA 1700065L07 gene	ncRNA
chr6-8879	chr6	74002968	74003968	+	8.42	1000	Intergenic	Intergenic	-532447	NR_108032	73408	Mm.233629	NR_108032		1700065L07Rik	RIKEN cDNA 1700065L07 gene	ncRNA
chr6-7488	chr6	74185010	74186010	+	8.42	1000	Intergenic	Lx8b|LINE|L1	-714489	NR_108032	73408	Mm.233629	NR_108032		1700065L07Rik	RIKEN cDNA 1700065L07 gene	ncRNA
chr6-8881	chr6	74150589	74151589	+	8.42	1000	Intergenic	Intergenic	-680068	NR_108032	73408	Mm.233629	NR_108032		1700065L07Rik	RIKEN cDNA 1700065L07 gene	ncRNA
chr6-10632	chr6	75083685	75084685	+	8.42	1000	Intergenic	(CAGAGA)n|Simple_repeat|Simple_repeat	-1613164	NR_108032	73408	Mm.233629	NR_108032		1700065L07Rik	RIKEN cDNA 1700065L07 gene	ncRNA
chr6-12500	chr6	74424804	74425804	+	8.24	1000	Intergenic	Intergenic	-954283	NR_108032	73408	Mm.233629	NR_108032		1700065L07Rik	RIKEN cDNA 1700065L07 gene	ncRNA
chr6-7482	chr6	74045886	74046886	+	8.24	1000	Intergenic	Intergenic	-575365	NR_108032	73408	Mm.233629	NR_108032		1700065L07Rik	RIKEN cDNA 1700065L07 gene	ncRNA
chr6-12515	chr6	75313962	75314962	+	8.24	1000	Intergenic	Intergenic	-1843441	NR_108032	73408	Mm.233629	NR_108032		1700065L07Rik	RIKEN cDNA 1700065L07 gene	ncRNA
chr6-8887	chr6	74617878	74618878	+	8.24	1000	Intergenic	Intergenic	-1147357	NR_108032	73408	Mm.233629	NR_108032		1700065L07Rik	RIKEN cDNA 1700065L07 gene	ncRNA
chr6-8893	chr6	75007723	75008723	+	8.24	1000	Intergenic	Intergenic	-1537202	NR_108032	73408	Mm.233629	NR_108032		1700065L07Rik	RIKEN cDNA 1700065L07 gene	ncRNA
chr6-12517	chr6	75341037	75342037	+	8.24	1000	Intergenic	Intergenic	-1870516	NR_108032	73408	Mm.233629	NR_108032		1700065L07Rik	RIKEN cDNA 1700065L07 gene	ncRNA
chr6-10619	chr6	74206729	74207729	+	8.24	1000	Intergenic	Intergenic	-736208	NR_108032	73408	Mm.233629	NR_108032		1700065L07Rik	RIKEN cDNA 1700065L07 gene	ncRNA
chr6-12512	chr6	75202258	75203258	+	8.05	1000	Intergenic	Intergenic	-1731737	NR_108032	73408	Mm.233629	NR_108032		1700065L07Rik	RIKEN cDNA 1700065L07 gene	ncRNA
chr6-12497	chr6	74328643	74329643	+	8.05	1000	Intergenic	MER74A|LTR|ERVL	-858122	NR_108032	73408	Mm.233629	NR_108032		1700065L07Rik	RIKEN cDNA 1700065L07 gene	ncRNA
chr6-12489	chr6	73970257	73971257	+	8.05	1000	Intergenic	L1_Mus4|LINE|L1	-499736	NR_108032	73408	Mm.233629	NR_108032		1700065L07Rik	RIKEN cDNA 1700065L07 gene	ncRNA
chr6-7476	chr6	73470114	73471114	+	8.05	1000	promoter-TSS (NM_025737)	promoter-TSS (NM_025737)	407	NR_108032	73408	Mm.233629	NR_108032		1700065L07Rik	RIKEN cDNA 1700065L07 gene	ncRNA
chr6-12484	chr6	73859645	73860645	+	8.05	1000	Intergenic	L1_Mus1|LINE|L1	-389124	NR_108032	73408	Mm.233629	NR_108032		1700065L07Rik	RIKEN cDNA 1700065L07 gene	ncRNA
chr6-12516	chr6	75336442	75337442	+	8.05	1000	Intergenic	LTRIS2|LTR|ERV1	-1865921	NR_108032	73408	Mm.233629	NR_108032		1700065L07Rik	RIKEN cDNA 1700065L07 gene	ncRNA
chr6-10613	chr6	73816738	73817738	+	8.05	1000	Intergenic	B3|SINE|B2	-346217	NR_108032	73408	Mm.233629	NR_108032		1700065L07Rik	RIKEN cDNA 1700065L07 gene	ncRNA
chr6-12494	chr6	74220785	74221785	+	7.87	1000	Intergenic	Intergenic	-750264	NR_108032	73408	Mm.233629	NR_108032		1700065L07Rik	RIKEN cDNA 1700065L07 gene	ncRNA
chr6-10633	chr6	75193936	75194936	+	7.87	1000	Intergenic	Lx7|LINE|L1	-1723415	NR_108032	73408	Mm.233629	NR_108032		1700065L07Rik	RIKEN cDNA 1700065L07 gene	ncRNA
chr6-8886	chr6	74566238	74567238	+	7.87	1000	Intergenic	Intergenic	-1095717	NR_108032	73408	Mm.233629	NR_108032		1700065L07Rik	RIKEN cDNA 1700065L07 gene	ncRNA
chr6-10630	chr6	74959434	74960434	+	7.87	1000	Intergenic	L1_Mur3|LINE|L1	-1488913	NR_108032	73408	Mm.233629	NR_108032		1700065L07Rik	RIKEN cDNA 1700065L07 gene	ncRNA
chr6-12504	chr6	74614272	74615272	+	7.87	1000	Intergenic	RLTR25B|LTR|ERVK	-1143751	NR_108032	73408	Mm.233629	NR_108032		1700065L07Rik	RIKEN cDNA 1700065L07 gene	ncRNA
chr6-12490	chr6	74064235	74065235	+	7.87	1000	Intergenic	Lx2B2|LINE|L1	-593714	NR_108032	73408	Mm.233629	NR_108032		1700065L07Rik	RIKEN cDNA 1700065L07 gene	ncRNA
chr6-12498	chr6	74374724	74375724	+	7.87	1000	Intergenic	Intergenic	-904203	NR_108032	73408	Mm.233629	NR_108032		1700065L07Rik	RIKEN cDNA 1700065L07 gene	ncRNA
chr6-12480	chr6	73591944	73592944	+	7.69	1000	Intergenic	Intergenic	-121423	NR_108032	73408	Mm.233629	NR_108032		1700065L07Rik	RIKEN cDNA 1700065L07 gene	ncRNA
chr6-12506	chr6	74826243	74827243	+	7.69	1000	Intergenic	Intergenic	-1355722	NR_108032	73408	Mm.233629	NR_108032		1700065L07Rik	RIKEN cDNA 1700065L07 gene	ncRNA
chr6-12479	chr6	73509378	73510378	+	7.5	1000	Intergenic	Intergenic	-38857	NR_108032	73408	Mm.233629	NR_108032		1700065L07Rik	RIKEN cDNA 1700065L07 gene	ncRNA
chr6-12514	chr6	75263401	75264401	+	7.5	1000	Intergenic	RMER10A|LTR|ERVL	-1792880	NR_108032	73408	Mm.233629	NR_108032		1700065L07Rik	RIKEN cDNA 1700065L07 gene	ncRNA
chr1-3053	chr1	88935537	88937589	+	19.6	2052	Intergenic	Intergenic	-79550	NR_040471	73475	Mm.491040	NR_040471		1700067G17Rik	RIKEN cDNA 1700067G17 gene	ncRNA
chr1-12699	chr1	88926359	88927840	+	12.3	1481	Intergenic	B3A|SINE|B2	-89014	NR_040471	73475	Mm.491040	NR_040471		1700067G17Rik	RIKEN cDNA 1700067G17 gene	ncRNA
chr17-9682	chr17	48064031	48066624	+	19.2	2593	non-coding (NR_110485, exon 3 of 3)	non-coding (NR_110485, exon 3 of 3)	-24305	NM_026625	68224	Mm.138490	NM_026625	ENSMUSG00000021545	1700067P10Rik	RIKEN cDNA 1700067P10 gene	protein-coding
chr17-4740	chr17	48070609	48072166	+	13.7	1557	intron (NR_110485, intron 1 of 2)	B3A|SINE|B2	-18245	NM_026625	68224	Mm.138490	NM_026625	ENSMUSG00000021545	1700067P10Rik	RIKEN cDNA 1700067P10 gene	protein-coding
chr17-4090	chr17	48081005	48082586	+	13.5	1581	intron (NR_110485, intron 1 of 2)	intron (NR_110485, intron 1 of 2)	-7837	NM_026625	68224	Mm.138490	NM_026625	ENSMUSG00000021545	1700067P10Rik	RIKEN cDNA 1700067P10 gene	protein-coding
chr17-5430	chr17	48088053	48089053	+	8.97	1000	intron (NR_110485, intron 1 of 2)	MLT1C|LTR|ERVL-MaLR	-1079	NM_026625	68224	Mm.138490	NM_026625	ENSMUSG00000021545	1700067P10Rik	RIKEN cDNA 1700067P10 gene	protein-coding
chr17-6289	chr17	48084185	48085185	+	8.6	1000	intron (NR_110485, intron 1 of 2)	MLT1B|LTR|ERVL-MaLR	-4947	NM_026625	68224	Mm.138490	NM_026625	ENSMUSG00000021545	1700067P10Rik	RIKEN cDNA 1700067P10 gene	protein-coding
chr5-15565	chr5	113701422	113702422	+	8.05	1000	intron (NR_033216, intron 2 of 2)	intron (NR_033216, intron 2 of 2)	22850	NR_033216	381707	Mm.159016	NR_033216	ENSMUSG00000042184	1700069L16Rik	RIKEN cDNA 1700069L16 gene	ncRNA
chr5-18000	chr5	113714332	113715332	+	8.05	1000	intron (NR_033216, intron 2 of 2)	B2_Mm2|SINE|B2	9940	NR_033216	381707	Mm.159016	NR_033216	ENSMUSG00000042184	1700069L16Rik	RIKEN cDNA 1700069L16 gene	ncRNA
chr5-18001	chr5	113727733	113728733	+	7.69	1000	Intergenic	LTR33A_|LTR|ERVL	-3461	NR_033216	381707	Mm.159016	NR_033216	ENSMUSG00000042184	1700069L16Rik	RIKEN cDNA 1700069L16 gene	ncRNA
chr6-11028	chr6	118221266	118225221	+	28.2	3955	Intergenic	CT-rich|Low_complexity|Low_complexity	25211	NR_040527	73531	Mm.396245	NR_040527		1700069P05Rik	RIKEN cDNA 1700069P05 gene	ncRNA
chr6-6542	chr6	118235127	118238378	+	23.4	3251	Intergenic	ORR1F|LTR|ERVL-MaLR	11702	NR_040527	73531	Mm.396245	NR_040527		1700069P05Rik	RIKEN cDNA 1700069P05 gene	ncRNA
chr6-7770	chr6	118250958	118251958	+	8.79	1000	Intergenic	Intergenic	-3004	NR_040527	73531	Mm.396245	NR_040527		1700069P05Rik	RIKEN cDNA 1700069P05 gene	ncRNA
chr6-9247	chr6	118253986	118254986	+	8.24	1000	Intergenic	Intergenic	-6032	NR_040527	73531	Mm.396245	NR_040527		1700069P05Rik	RIKEN cDNA 1700069P05 gene	ncRNA
chr11-5395	chr11	81542463	81545150	+	21	2687	intron (NM_001034013, intron 1 of 9)	intron (NM_001034013, intron 1 of 9)	29733	NM_001033765	237880	Mm.435528	NM_001033765		1700071K01Rik	RIKEN cDNA 1700071K01 gene	protein-coding
chr11-9091	chr11	81552677	81554026	+	11	1349	intron (NM_001034013, intron 1 of 9)	intron (NM_001034013, intron 1 of 9)	20188	NM_001033765	237880	Mm.435528	NM_001033765		1700071K01Rik	RIKEN cDNA 1700071K01 gene	protein-coding
chr11-6137	chr11	81564825	81565825	+	8.6	1000	intron (NM_001034013, intron 1 of 9)	intron (NM_001034013, intron 1 of 9)	8214	NM_001033765	237880	Mm.435528	NM_001033765		1700071K01Rik	RIKEN cDNA 1700071K01 gene	protein-coding
chr11-7001	chr11	81429913	81430913	+	8.42	1000	intron (NM_001034013, intron 1 of 9)	MTC|LTR|ERVL-MaLR	143126	NM_001033765	237880	Mm.435528	NM_001033765		1700071K01Rik	RIKEN cDNA 1700071K01 gene	protein-coding
chr9-5384	chr9	58400546	58401843	+	10.3	1297	Intergenic	Intergenic	30690	NR_040727	73529	Mm.490924	NR_040727		1700072B07Rik	RIKEN cDNA 1700072B07 gene	ncRNA
chr6-11412	chr6	145404194	145405447	+	11.7	1253	intron (NM_028742, intron 8 of 9)	B3|SINE|B2	17195	NR_003625	381827	Mm.179075	NM_001001987		1700073E17Rik	ribosomal protein L7 pseudogene	pseudo
chr2-8131	chr2	3976726	3980972	+	35.7	4246	Intergenic	MuRRS4-int|LTR|ERV1	162292	NR_040500	73489	Mm.488103	NR_040500	ENSMUSG00000084859	1700080N15Rik	RIKEN cDNA 1700080N15 gene	ncRNA
chr2-8130	chr2	3946637	3950216	+	25.6	3579	Intergenic	RLTR9A3B|LTR|ERVK	192715	NR_040500	73489	Mm.488103	NR_040500	ENSMUSG00000084859	1700080N15Rik	RIKEN cDNA 1700080N15 gene	ncRNA
chr2-241	chr2	3963957	3965237	+	14.5	1280	Intergenic	Intergenic	176544	NR_040500	73489	Mm.488103	NR_040500	ENSMUSG00000084859	1700080N15Rik	RIKEN cDNA 1700080N15 gene	ncRNA
chr2-4926	chr2	3942322	3943649	+	10.8	1327	Intergenic	Intergenic	198156	NR_040500	73489	Mm.488103	NR_040500	ENSMUSG00000084859	1700080N15Rik	RIKEN cDNA 1700080N15 gene	ncRNA
chr2-6892	chr2	3939538	3940538	+	8.6	1000	Intergenic	Intergenic	201103	NR_040500	73489	Mm.488103	NR_040500	ENSMUSG00000084859	1700080N15Rik	RIKEN cDNA 1700080N15 gene	ncRNA
chr5-10270	chr5	119050784	119063509	+	115.5	12725	Intergenic	Intergenic	-51090	NR_040693	73477	Mm.410863	NR_040693		1700081H04Rik	RIKEN cDNA 1700081H04 gene	ncRNA
chr5-11814	chr5	119070745	119079187	+	68.6	8442	Intergenic	Intergenic	-33270	NR_040693	73477	Mm.410863	NR_040693		1700081H04Rik	RIKEN cDNA 1700081H04 gene	ncRNA
chr5-10277	chr5	119125553	119132417	+	49.6	6864	Intergenic	(GA)n|Simple_repeat|Simple_repeat	20749	NR_040693	73477	Mm.410863	NR_040693		1700081H04Rik	RIKEN cDNA 1700081H04 gene	ncRNA
chr5-18226	chr5	119085016	119087984	+	25.3	2968	Intergenic	Intergenic	-21736	NR_040693	73477	Mm.410863	NR_040693		1700081H04Rik	RIKEN cDNA 1700081H04 gene	ncRNA
chr5-18227	chr5	119094256	119097229	+	22.7	2973	Intergenic	RLTR51A_Mm|LTR|ERVK?	-12494	NR_040693	73477	Mm.410863	NR_040693		1700081H04Rik	RIKEN cDNA 1700081H04 gene	ncRNA
chr5-13665	chr5	119035783	119038072	+	19	2289	Intergenic	Intergenic	-71309	NR_040693	73477	Mm.410863	NR_040693		1700081H04Rik	RIKEN cDNA 1700081H04 gene	ncRNA
chr5-2416	chr5	119134514	119136372	+	18.3	1858	Intergenic	Intergenic	27207	NR_040693	73477	Mm.410863	NR_040693		1700081H04Rik	RIKEN cDNA 1700081H04 gene	ncRNA
chr5-18222	chr5	119047201	119049225	+	17.2	2024	Intergenic	Intergenic	-60023	NR_040693	73477	Mm.410863	NR_040693		1700081H04Rik	RIKEN cDNA 1700081H04 gene	ncRNA
chr5-11813	chr5	119067237	119069194	+	16.3	1957	Intergenic	B4|SINE|B4	-40021	NR_040693	73477	Mm.410863	NR_040693		1700081H04Rik	RIKEN cDNA 1700081H04 gene	ncRNA
chr5-15712	chr5	119080838	119082633	+	14.5	1795	Intergenic	B1_Mur4|SINE|Alu	-26501	NR_040693	73477	Mm.410863	NR_040693		1700081H04Rik	RIKEN cDNA 1700081H04 gene	ncRNA
chr5-10275	chr5	119089834	119091498	+	13.9	1664	Intergenic	ID_B1|SINE|B4	-17570	NR_040693	73477	Mm.410863	NR_040693		1700081H04Rik	RIKEN cDNA 1700081H04 gene	ncRNA
chr5-11816	chr5	119148683	119149683	+	8.79	1000	Intergenic	Intergenic	40947	NR_040693	73477	Mm.410863	NR_040693		1700081H04Rik	RIKEN cDNA 1700081H04 gene	ncRNA
chr5-15710	chr5	119042211	119043211	+	7.87	1000	Intergenic	B3|SINE|B2	-65525	NR_040693	73477	Mm.410863	NR_040693		1700081H04Rik	RIKEN cDNA 1700081H04 gene	ncRNA
chr1-11703	chr1	169889401	169890912	+	13	1511	Intergenic	Lx8|LINE|L1	-38783	NM_001033185	78465	Mm.291078	NM_001033185	ENSMUSG00000070532	1700084C01Rik	RIKEN cDNA 1700084C01 gene	protein-coding
chr1-16338	chr1	169931691	169932691	+	8.24	1000	intron (NM_001033185, intron 2 of 3)	intron (NM_001033185, intron 2 of 3)	3252	NM_001033185	78465	Mm.291078	NM_001033185	ENSMUSG00000070532	1700084C01Rik	RIKEN cDNA 1700084C01 gene	protein-coding
chr2-8305	chr2	30226728	30233945	+	56.9	7217	Intergenic	MURVY-int|LTR|ERV1	7295	NR_028299	67350	Mm.402683	NR_028299		1700084E18Rik	RIKEN cDNA 1700084E18 gene	ncRNA
chr13-6193	chr13	69926700	69928101	+	11.5	1401	Intergenic	B1_Mus2|SINE|Alu	100948	NR_045965	74280	Mm.273343	NR_045965		1700084F23Rik	RIKEN cDNA 1700084F23 gene	ncRNA
chr13-4593	chr13	70111986	70113254	+	10.1	1268	Intergenic	L1VL4|LINE|L1	-84272	NR_045965	74280	Mm.273343	NR_045965		1700084F23Rik	RIKEN cDNA 1700084F23 gene	ncRNA
chr15-4888	chr15	33451239	33452502	+	9.88	1263	intron (NM_018755, intron 6 of 8)	L1VL4|LINE|L1	-45931	NR_033608	73486	Mm.483393	NM_028551		1700084J12Rik	ribosomal protein L7-like 1 pseudogene	pseudo
chr15-5813	chr15	33526815	33527815	+	8.05	1000	intron (NM_018755, intron 8 of 8)	ORR1A1|LTR|ERVL-MaLR	-121376	NR_033608	73486	Mm.483393	NM_028551		1700084J12Rik	ribosomal protein L7-like 1 pseudogene	pseudo
chr12-4466	chr12	74284927	74289610	+	37.5	4683	intron (NR_030735, intron 2 of 3)	intron (NR_030735, intron 2 of 3)	2992	NR_030734	74284	Mm.287421	NR_030733		1700086L19Rik	RIKEN cDNA 1700086L19 gene	ncRNA
chr12-3746	chr12	74183076	74184586	+	11.7	1510	intron (NM_172804, intron 2 of 6)	MTD-int|LTR|ERVL-MaLR	-100445	NR_030733	74284	Mm.287421	NR_030733		1700086L19Rik	RIKEN cDNA 1700086L19 gene	ncRNA
chr12-6419	chr12	74268478	74269478	+	7.87	1000	Intergenic	Intergenic	-15298	NR_030733	74284	Mm.287421	NR_030733		1700086L19Rik	RIKEN cDNA 1700086L19 gene	ncRNA
chr12-6418	chr12	74263392	74264392	+	7.87	1000	intron (NM_172804, intron 6 of 6)	intron (NM_172804, intron 6 of 6)	-20384	NR_030733	74284	Mm.287421	NR_030733		1700086L19Rik	RIKEN cDNA 1700086L19 gene	ncRNA
chr18-3646	chr18	38234584	38235584	+	8.05	1000	Intergenic	Intergenic	15114	NR_027903	73516	Mm.48776	NR_015475	ENSMUSG00000097080	1700086O06Rik	RIKEN cDNA 1700086O06 gene	ncRNA
chr15-5237	chr15	79135335	79139418	+	31.8	4083	TTS (NM_177461)	TTS (NM_177461)	3875	NM_138581	27660	Mm.390827	NM_138581	ENSMUSG00000033029	1700088E04Rik	RIKEN cDNA 1700088E04 gene	protein-coding
chr15-6179	chr15	79129588	79132684	+	22.7	3096	intron (NM_177461, intron 13 of 15)	B1_Mur4|SINE|Alu	10115	NM_138581	27660	Mm.390827	NM_138581	ENSMUSG00000033029	1700088E04Rik	RIKEN cDNA 1700088E04 gene	protein-coding
chr14-6487	chr14	41964042	41965042	+	8.24	1000	Intergenic	Intergenic	130735	NR_073362	73553	Mm.243777	NM_028570		1700091H14Rik	RIKEN cDNA 1700091H14 gene	ncRNA
chr13-7892	chr13	26448495	26455958	+	58.2	7463	Intergenic	Intergenic	-139820	NR_045933	73576	Mm.45473	NR_045933		1700092E19Rik	RIKEN cDNA 1700092E19 gene	ncRNA
chr13-2813	chr13	26374131	26377475	+	27.5	3344	Intergenic	Intergenic	-63397	NR_045933	73576	Mm.45473	NR_045933		1700092E19Rik	RIKEN cDNA 1700092E19 gene	ncRNA
chr13-5848	chr13	26437047	26440308	+	27.1	3261	Intergenic	CT-rich|Low_complexity|Low_complexity	-126271	NR_045933	73576	Mm.45473	NR_045933		1700092E19Rik	RIKEN cDNA 1700092E19 gene	ncRNA
chr13-4359	chr13	26362940	26366240	+	26.4	3300	Intergenic	Intergenic	-52184	NR_045933	73576	Mm.45473	NR_045933		1700092E19Rik	RIKEN cDNA 1700092E19 gene	ncRNA
chr13-6822	chr13	26478933	26481239	+	20.5	2306	Intergenic	Lx7|LINE|L1	-167680	NR_045933	73576	Mm.45473	NR_045933		1700092E19Rik	RIKEN cDNA 1700092E19 gene	ncRNA
chr13-3774	chr13	26537728	26539900	+	19	2172	Intergenic	Intergenic	-226408	NR_045933	73576	Mm.45473	NR_045933		1700092E19Rik	RIKEN cDNA 1700092E19 gene	ncRNA
chr13-2452	chr13	26348175	26349600	+	11.2	1425	Intergenic	Lx2|LINE|L1	-36481	NR_045933	73576	Mm.45473	NR_045933		1700092E19Rik	RIKEN cDNA 1700092E19 gene	ncRNA
chr13-1858	chr13	26494555	26495810	+	11	1255	Intergenic	Intergenic	-182776	NR_045933	73576	Mm.45473	NR_045933		1700092E19Rik	RIKEN cDNA 1700092E19 gene	ncRNA
chr13-2814	chr13	26380260	26381522	+	10.4	1262	Intergenic	Intergenic	-68485	NR_045933	73576	Mm.45473	NR_045933		1700092E19Rik	RIKEN cDNA 1700092E19 gene	ncRNA
chr13-3771	chr13	26398100	26399100	+	9.15	1000	Intergenic	MER103C|DNA|hAT-Charlie	-86194	NR_045933	73576	Mm.45473	NR_045933		1700092E19Rik	RIKEN cDNA 1700092E19 gene	ncRNA
chr13-3772	chr13	26426011	26427011	+	8.97	1000	Intergenic	RLTR17|LTR|ERVK	-114105	NR_045933	73576	Mm.45473	NR_045933		1700092E19Rik	RIKEN cDNA 1700092E19 gene	ncRNA
chr13-5846	chr13	26337954	26338954	+	8.6	1000	Intergenic	B4A|SINE|B4	-26048	NR_045933	73576	Mm.45473	NR_045933		1700092E19Rik	RIKEN cDNA 1700092E19 gene	ncRNA
chr13-5030	chr13	26342123	26343123	+	8.6	1000	Intergenic	Intergenic	-30217	NR_045933	73576	Mm.45473	NR_045933		1700092E19Rik	RIKEN cDNA 1700092E19 gene	ncRNA
chr13-5845	chr13	26173864	26174864	+	8.42	1000	Intergenic	Intergenic	138042	NR_045933	73576	Mm.45473	NR_045933		1700092E19Rik	RIKEN cDNA 1700092E19 gene	ncRNA
chr13-6820	chr13	26393054	26394054	+	8.05	1000	Intergenic	Intergenic	-81148	NR_045933	73576	Mm.45473	NR_045933		1700092E19Rik	RIKEN cDNA 1700092E19 gene	ncRNA
chr13-6818	chr13	26254412	26255412	+	8.05	1000	Intergenic	Intergenic	57494	NR_045933	73576	Mm.45473	NR_045933		1700092E19Rik	RIKEN cDNA 1700092E19 gene	ncRNA
chr11-9460	chr11	114244736	114250951	+	45.9	6215	Intergenic	MLTR14|LTR|ERV1	49585	NR_045930	73536	Mm.54275	NR_045930	ENSMUSG00000078600	1700092K14Rik	RIKEN cDNA 1700092K14 gene	ncRNA
chr11-9462	chr11	114252929	114258371	+	40.5	5442	Intergenic	B4A|SINE|B4	57392	NR_045930	73536	Mm.54275	NR_045930	ENSMUSG00000078600	1700092K14Rik	RIKEN cDNA 1700092K14 gene	ncRNA
chr11-7362	chr11	114237692	114241910	+	39	4218	Intergenic	Intergenic	41543	NR_045930	73536	Mm.54275	NR_045930	ENSMUSG00000078600	1700092K14Rik	RIKEN cDNA 1700092K14 gene	ncRNA
chr11-5017	chr11	114231630	114235583	+	35.7	3953	Intergenic	L1MC2|LINE|L1	35348	NR_045930	73536	Mm.54275	NR_045930	ENSMUSG00000078600	1700092K14Rik	RIKEN cDNA 1700092K14 gene	ncRNA
chr11-6443	chr11	114312592	114314417	+	15.4	1825	Intergenic	Intergenic	115246	NR_045930	73536	Mm.54275	NR_045930	ENSMUSG00000078600	1700092K14Rik	RIKEN cDNA 1700092K14 gene	ncRNA
chr11-3806	chr11	114225811	114227559	+	13.9	1748	Intergenic	Intergenic	28427	NR_045930	73536	Mm.54275	NR_045930	ENSMUSG00000078600	1700092K14Rik	RIKEN cDNA 1700092K14 gene	ncRNA
chr11-4394	chr11	114284183	114285740	+	13.7	1557	Intergenic	Intergenic	86703	NR_045930	73536	Mm.54275	NR_045930	ENSMUSG00000078600	1700092K14Rik	RIKEN cDNA 1700092K14 gene	ncRNA
chr11-7360	chr11	114216195	114217808	+	13.4	1613	Intergenic	Intergenic	18743	NR_045930	73536	Mm.54275	NR_045930	ENSMUSG00000078600	1700092K14Rik	RIKEN cDNA 1700092K14 gene	ncRNA
chr11-5016	chr11	114202986	114204263	+	10.3	1277	Intergenic	Intergenic	5366	NR_045930	73536	Mm.54275	NR_045930	ENSMUSG00000078600	1700092K14Rik	RIKEN cDNA 1700092K14 gene	ncRNA
chr11-7363	chr11	114269968	114270968	+	8.05	1000	Intergenic	Intergenic	72210	NR_045930	73536	Mm.54275	NR_045930	ENSMUSG00000078600	1700092K14Rik	RIKEN cDNA 1700092K14 gene	ncRNA
chr11-1256	chr11	23530927	23534487	+	34	3560	Intergenic	MuRRS4-int|LTR|ERV1	-12765	NM_001110133	67358	Mm.87328	NM_026105	ENSMUSG00000020286	1700093K21Rik	RIKEN cDNA 1700093K21 gene	protein-coding
chr11-5860	chr11	23527003	23529372	+	19	2369	Intergenic	MuRRS4-int|LTR|ERV1	-8245	NM_001110133	67358	Mm.87328	NM_026105	ENSMUSG00000020286	1700093K21Rik	RIKEN cDNA 1700093K21 gene	protein-coding
chr6-12152	chr6	52456528	52459211	+	20.9	2683	Intergenic	Intergenic	-34582	NR_046049	74304	Mm.490579	NR_046049		1700094M24Rik	RIKEN cDNA 1700094M24 gene	ncRNA
chr4-384	chr4	146739104	146742969	+	45.8	3865	Intergenic	B2_Mm1a|SINE|B2	-194163	NR_045468	67524	Mm.444300	NR_045468	ENSMUSG00000086046	1700095A21Rik	RIKEN cDNA 1700095A21 gene	ncRNA
chr4-2031	chr4	146540385	146541385	+	10.1	1000	intron (NR_045468, intron 2 of 2)	intron (NR_045468, intron 2 of 2)	5988	NR_045468	67524	Mm.444300	NR_045468	ENSMUSG00000086046	1700095A21Rik	RIKEN cDNA 1700095A21 gene	ncRNA
chr5-13469	chr5	112810935	112817870	+	56.9	6935	intron (NM_028901, intron 22 of 43)	intron (NM_028901, intron 22 of 43)	21110	NR_040676	67360	Mm.59218	NR_040675	ENSMUSG00000098230	1700095B10Rik	RIKEN cDNA 1700095B10 gene	ncRNA
chr5-13465	chr5	112690372	112695099	+	34.6	4727	exon (NM_028901, exon 43 of 44)	exon (NM_028901, exon 43 of 44)	-100557	NR_040675	67360	Mm.59218	NR_040675	ENSMUSG00000098230	1700095B10Rik	RIKEN cDNA 1700095B10 gene	ncRNA
chr5-5630	chr5	112794532	112798666	+	34.4	4134	intron (NR_040675, intron 2 of 3)	intron (NR_040675, intron 2 of 3)	3307	NR_040676	67360	Mm.59218	NR_040675	ENSMUSG00000098230	1700095B10Rik	RIKEN cDNA 1700095B10 gene	ncRNA
chr5-8675	chr5	112775034	112778616	+	32	3582	intron (NM_028901, intron 33 of 43)	intron (NM_028901, intron 33 of 43)	-16467	NR_040675	67360	Mm.59218	NR_040675	ENSMUSG00000098230	1700095B10Rik	RIKEN cDNA 1700095B10 gene	ncRNA
chr5-17952	chr5	112721014	112723302	+	17.2	2288	intron (NM_028901, intron 40 of 43)	intron (NM_028901, intron 40 of 43)	-71134	NR_040675	67360	Mm.59218	NR_040675	ENSMUSG00000098230	1700095B10Rik	RIKEN cDNA 1700095B10 gene	ncRNA
chr5-10114	chr5	112839288	112840995	+	13.5	1707	intron (NM_028901, intron 15 of 43)	intron (NM_028901, intron 15 of 43)	46849	NR_040676	67360	Mm.59218	NR_040675	ENSMUSG00000098230	1700095B10Rik	RIKEN cDNA 1700095B10 gene	ncRNA
chr5-13466	chr5	112698948	112699948	+	8.79	1000	intron (NM_028901, intron 42 of 43)	intron (NM_028901, intron 42 of 43)	-93844	NR_040675	67360	Mm.59218	NR_040675	ENSMUSG00000098230	1700095B10Rik	RIKEN cDNA 1700095B10 gene	ncRNA
chr5-11666	chr5	112832624	112833624	+	8.42	1000	intron (NM_028901, intron 18 of 43)	intron (NM_028901, intron 18 of 43)	39832	NR_040676	67360	Mm.59218	NR_040675	ENSMUSG00000098230	1700095B10Rik	RIKEN cDNA 1700095B10 gene	ncRNA
chr5-15533	chr5	112805412	112806412	+	8.24	1000	intron (NM_028901, intron 25 of 43)	intron (NM_028901, intron 25 of 43)	12620	NR_040676	67360	Mm.59218	NR_040675	ENSMUSG00000098230	1700095B10Rik	RIKEN cDNA 1700095B10 gene	ncRNA
chr5-17955	chr5	112802412	112803412	+	8.24	1000	intron (NM_028901, intron 26 of 43)	intron (NM_028901, intron 26 of 43)	9620	NR_040676	67360	Mm.59218	NR_040675	ENSMUSG00000098230	1700095B10Rik	RIKEN cDNA 1700095B10 gene	ncRNA
chr5-17954	chr5	112768029	112769029	+	8.05	1000	intron (NM_028901, intron 34 of 43)	intron (NM_028901, intron 34 of 43)	-24763	NR_040675	67360	Mm.59218	NR_040675	ENSMUSG00000098230	1700095B10Rik	RIKEN cDNA 1700095B10 gene	ncRNA
chr11-6392	chr11	109332278	109341889	+	76.5	9611	Intergenic	Intergenic	-9784	NR_027883	67927	Mm.394490	NR_027883		1700096J18Rik	RIKEN cDNA 1700096J18 gene	ncRNA
chr11-7311	chr11	109326731	109330695	+	37.2	3964	Intergenic	B3|SINE|B2	-18154	NR_027883	67927	Mm.394490	NR_027883		1700096J18Rik	RIKEN cDNA 1700096J18 gene	ncRNA
chr11-6395	chr11	109346980	109348506	+	13.2	1526	intron (NR_027883, intron 1 of 1)	intron (NR_027883, intron 1 of 1)	876	NR_027883	67927	Mm.394490	NR_027883		1700096J18Rik	RIKEN cDNA 1700096J18 gene	ncRNA
chr11-8306	chr11	109344265	109345265	+	8.24	1000	Intergenic	Tigger7|DNA|TcMar-Tigger	-2102	NR_027883	67927	Mm.394490	NR_027883		1700096J18Rik	RIKEN cDNA 1700096J18 gene	ncRNA
chr13-7205	chr13	70446111	70449923	+	31.1	3812	Intergenic	Intergenic	-125224	NR_045934	73584	Mm.442491	NR_045934		1700100L14Rik	RIKEN cDNA 1700100L14 gene	ncRNA
chr13-1955	chr13	70530765	70532018	+	11	1253	Intergenic	Intergenic	-41850	NR_045934	73584	Mm.442491	NR_045934		1700100L14Rik	RIKEN cDNA 1700100L14 gene	ncRNA
chr13-2974	chr13	70527809	70529153	+	10.6	1344	Intergenic	Intergenic	-44760	NR_045934	73584	Mm.442491	NR_045934		1700100L14Rik	RIKEN cDNA 1700100L14 gene	ncRNA
chr13-8366	chr13	70471739	70473026	+	9.15	1287	Intergenic	L1Md_F2|LINE|L1	-100859	NR_045934	73584	Mm.442491	NR_045934		1700100L14Rik	RIKEN cDNA 1700100L14 gene	ncRNA
chr13-6195	chr13	70422707	70423707	+	8.6	1000	Intergenic	RLTR20A2|LTR|ERVK	-150034	NR_045934	73584	Mm.442491	NR_045934		1700100L14Rik	RIKEN cDNA 1700100L14 gene	ncRNA
chr13-8369	chr13	70549167	70550167	+	8.24	1000	Intergenic	Intergenic	-23574	NR_045934	73584	Mm.442491	NR_045934		1700100L14Rik	RIKEN cDNA 1700100L14 gene	ncRNA
chr12-5797	chr12	6507580	6513239	+	45	5659	Intergenic	MTD|LTR|ERVL-MaLR	869921	NR_045045	73575	Mm.179463	NR_045045		1700101O22Rik	RIKEN cDNA 1700101O22 gene	ncRNA
chr12-5811	chr12	6811414	6817119	+	43.6	5705	Intergenic	Intergenic	566064	NR_045045	73575	Mm.179463	NR_045045		1700101O22Rik	RIKEN cDNA 1700101O22 gene	ncRNA
chr12-3417	chr12	6728006	6733605	+	43	5599	Intergenic	Intergenic	649525	NR_045045	73575	Mm.179463	NR_045045		1700101O22Rik	RIKEN cDNA 1700101O22 gene	ncRNA
chr12-4916	chr12	6688057	6693167	+	39.9	5110	Intergenic	RLTR20A4|LTR|ERVK	689718	NR_045045	73575	Mm.179463	NR_045045		1700101O22Rik	RIKEN cDNA 1700101O22 gene	ncRNA
chr12-2366	chr12	6860915	6866481	+	39.5	5566	Intergenic	L1M2|LINE|L1	516632	NR_045045	73575	Mm.179463	NR_045045		1700101O22Rik	RIKEN cDNA 1700101O22 gene	ncRNA
chr12-4922	chr12	6747032	6752181	+	35.7	5149	Intergenic	Intergenic	630724	NR_045045	73575	Mm.179463	NR_045045		1700101O22Rik	RIKEN cDNA 1700101O22 gene	ncRNA
chr12-3415	chr12	6527177	6531389	+	31.8	4212	Intergenic	L1_Mus2|LINE|L1	851047	NR_045045	73575	Mm.179463	NR_045045		1700101O22Rik	RIKEN cDNA 1700101O22 gene	ncRNA
chr12-5810	chr12	6799250	6802656	+	30.4	3406	Intergenic	MLT1C|LTR|ERVL-MaLR	579377	NR_045045	73575	Mm.179463	NR_045045		1700101O22Rik	RIKEN cDNA 1700101O22 gene	ncRNA
chr12-2847	chr12	7127330	7130972	+	28.9	3642	Intergenic	Intergenic	251179	NR_045045	73575	Mm.179463	NR_045045		1700101O22Rik	RIKEN cDNA 1700101O22 gene	ncRNA
chr12-1995	chr12	6901826	6905411	+	28	3585	Intergenic	(TC)n|Simple_repeat|Simple_repeat	476712	NR_045045	73575	Mm.179463	NR_045045		1700101O22Rik	RIKEN cDNA 1700101O22 gene	ncRNA
chr12-5830	chr12	7437443	7441315	+	26.2	3872	Intergenic	Lx8b|LINE|L1	-59049	NR_045045	73575	Mm.179463	NR_045045		1700101O22Rik	RIKEN cDNA 1700101O22 gene	ncRNA
chr12-1209	chr12	6709107	6712224	+	25.4	3117	Intergenic	Intergenic	669665	NR_045045	73575	Mm.179463	NR_045045		1700101O22Rik	RIKEN cDNA 1700101O22 gene	ncRNA
chr12-1024	chr12	6536330	6539570	+	25.1	3240	Intergenic	Intergenic	842380	NR_045045	73575	Mm.179463	NR_045045		1700101O22Rik	RIKEN cDNA 1700101O22 gene	ncRNA
chr12-2834	chr12	6547074	6550409	+	24.7	3335	Intergenic	L1Md_F2|LINE|L1	831589	NR_045045	73575	Mm.179463	NR_045045		1700101O22Rik	RIKEN cDNA 1700101O22 gene	ncRNA
chr12-2850	chr12	7185233	7187841	+	24.2	2608	Intergenic	Intergenic	193793	NR_045045	73575	Mm.179463	NR_045045		1700101O22Rik	RIKEN cDNA 1700101O22 gene	ncRNA
chr12-1412	chr12	6755406	6758066	+	23.6	2660	Intergenic	L1_Mus3|LINE|L1	623594	NR_045045	73575	Mm.179463	NR_045045		1700101O22Rik	RIKEN cDNA 1700101O22 gene	ncRNA
chr12-1690	chr12	6874425	6877197	+	22.7	2772	Intergenic	Intergenic	504519	NR_045045	73575	Mm.179463	NR_045045		1700101O22Rik	RIKEN cDNA 1700101O22 gene	ncRNA
chr12-2848	chr12	7138306	7140792	+	21.4	2486	Intergenic	MIRb|SINE|MIR	240781	NR_045045	73575	Mm.179463	NR_045045		1700101O22Rik	RIKEN cDNA 1700101O22 gene	ncRNA
chr12-5817	chr12	6998155	7001005	+	20.5	2850	Intergenic	Intergenic	380750	NR_045045	73575	Mm.179463	NR_045045		1700101O22Rik	RIKEN cDNA 1700101O22 gene	ncRNA
chr12-5795	chr12	6479082	6481628	+	20.3	2546	Intergenic	Intergenic	899975	NR_045045	73575	Mm.179463	NR_045045		1700101O22Rik	RIKEN cDNA 1700101O22 gene	ncRNA
chr12-2365	chr12	6856458	6858739	+	19.6	2281	Intergenic	Intergenic	522732	NR_045045	73575	Mm.179463	NR_045045		1700101O22Rik	RIKEN cDNA 1700101O22 gene	ncRNA
chr12-5827	chr12	7390725	7393047	+	19.2	2322	Intergenic	Intergenic	-11556	NR_045045	73575	Mm.179463	NR_045045		1700101O22Rik	RIKEN cDNA 1700101O22 gene	ncRNA
chr12-1687	chr12	6766816	6769053	+	18.7	2237	Intergenic	Intergenic	612396	NR_045045	73575	Mm.179463	NR_045045		1700101O22Rik	RIKEN cDNA 1700101O22 gene	ncRNA
chr12-4946	chr12	7160872	7162814	+	16.8	1942	Intergenic	Intergenic	218487	NR_045045	73575	Mm.179463	NR_045045		1700101O22Rik	RIKEN cDNA 1700101O22 gene	ncRNA
chr12-5798	chr12	6542731	6544779	+	16.5	2048	Intergenic	Intergenic	836575	NR_045045	73575	Mm.179463	NR_045045		1700101O22Rik	RIKEN cDNA 1700101O22 gene	ncRNA
chr12-4088	chr12	6404698	6406528	+	15.9	1830	Intergenic	Intergenic	974717	NR_045045	73575	Mm.179463	NR_045045		1700101O22Rik	RIKEN cDNA 1700101O22 gene	ncRNA
chr12-5825	chr12	7318630	7320492	+	14.8	1862	Intergenic	Intergenic	60769	NR_045045	73575	Mm.179463	NR_045045		1700101O22Rik	RIKEN cDNA 1700101O22 gene	ncRNA
chr12-2845	chr12	6888935	6890692	+	14.3	1757	Intergenic	Lx8|LINE|L1	490517	NR_045045	73575	Mm.179463	NR_045045		1700101O22Rik	RIKEN cDNA 1700101O22 gene	ncRNA
chr12-4089	chr12	6440067	6441743	+	13.7	1676	Intergenic	Intergenic	939425	NR_045045	73575	Mm.179463	NR_045045		1700101O22Rik	RIKEN cDNA 1700101O22 gene	ncRNA
chr12-1211	chr12	6823005	6824661	+	13.5	1656	Intergenic	L1_Mur2|LINE|L1	556497	NR_045045	73575	Mm.179463	NR_045045		1700101O22Rik	RIKEN cDNA 1700101O22 gene	ncRNA
chr12-4100	chr12	6782515	6784124	+	13.4	1609	Intergenic	Intergenic	597011	NR_045045	73575	Mm.179463	NR_045045		1700101O22Rik	RIKEN cDNA 1700101O22 gene	ncRNA
chr12-457	chr12	7592382	7593731	+	13	1349	Intergenic	Intergenic	-212726	NR_045045	73575	Mm.179463	NR_045045		1700101O22Rik	RIKEN cDNA 1700101O22 gene	ncRNA
chr12-4091	chr12	6494197	6495723	+	12.8	1526	Intergenic	Lx5c|LINE|L1	885370	NR_045045	73575	Mm.179463	NR_045045		1700101O22Rik	RIKEN cDNA 1700101O22 gene	ncRNA
chr12-4942	chr12	7109010	7110594	+	12.6	1584	Intergenic	L1M3c|LINE|L1	270528	NR_045045	73575	Mm.179463	NR_045045		1700101O22Rik	RIKEN cDNA 1700101O22 gene	ncRNA
chr12-4114	chr12	7423718	7425360	+	12.6	1642	Intergenic	Intergenic	-44209	NR_045045	73575	Mm.179463	NR_045045		1700101O22Rik	RIKEN cDNA 1700101O22 gene	ncRNA
chr12-4928	chr12	6794282	6795813	+	12.6	1531	Intergenic	Intergenic	585283	NR_045045	73575	Mm.179463	NR_045045		1700101O22Rik	RIKEN cDNA 1700101O22 gene	ncRNA
chr12-1408	chr12	6424877	6426158	+	11.7	1281	Intergenic	MER68C|LTR|ERVL	954813	NR_045045	73575	Mm.179463	NR_045045		1700101O22Rik	RIKEN cDNA 1700101O22 gene	ncRNA
chr12-4101	chr12	6785956	6787330	+	11.5	1374	Intergenic	Intergenic	593687	NR_045045	73575	Mm.179463	NR_045045		1700101O22Rik	RIKEN cDNA 1700101O22 gene	ncRNA
chr12-1685	chr12	6681624	6682898	+	11.5	1274	Intergenic	RMER1B|Other|Other	698069	NR_045045	73575	Mm.179463	NR_045045		1700101O22Rik	RIKEN cDNA 1700101O22 gene	ncRNA
chr12-4104	chr12	6934909	6936285	+	11.3	1376	Intergenic	Intergenic	444733	NR_045045	73575	Mm.179463	NR_045045		1700101O22Rik	RIKEN cDNA 1700101O22 gene	ncRNA
chr12-1210	chr12	6764038	6765295	+	11.2	1257	Intergenic	Intergenic	615664	NR_045045	73575	Mm.179463	NR_045045		1700101O22Rik	RIKEN cDNA 1700101O22 gene	ncRNA
chr12-4948	chr12	7282004	7283409	+	11.2	1405	Intergenic	Intergenic	97624	NR_045045	73575	Mm.179463	NR_045045		1700101O22Rik	RIKEN cDNA 1700101O22 gene	ncRNA
chr12-5800	chr12	6558903	6560240	+	11.2	1337	Intergenic	Lx|LINE|L1	820759	NR_045045	73575	Mm.179463	NR_045045		1700101O22Rik	RIKEN cDNA 1700101O22 gene	ncRNA
chr12-4940	chr12	7083534	7084850	+	10.8	1316	Intergenic	Intergenic	296138	NR_045045	73575	Mm.179463	NR_045045		1700101O22Rik	RIKEN cDNA 1700101O22 gene	ncRNA
chr12-3433	chr12	7165867	7167121	+	10.8	1254	Intergenic	Lx5|LINE|L1	213836	NR_045045	73575	Mm.179463	NR_045045		1700101O22Rik	RIKEN cDNA 1700101O22 gene	ncRNA
chr12-5801	chr12	6627096	6628384	+	10.6	1288	Intergenic	L1Md_F2|LINE|L1	752590	NR_045045	73575	Mm.179463	NR_045045		1700101O22Rik	RIKEN cDNA 1700101O22 gene	ncRNA
chr12-2851	chr12	7295048	7296304	+	10.6	1256	Intergenic	Intergenic	84654	NR_045045	73575	Mm.179463	NR_045045		1700101O22Rik	RIKEN cDNA 1700101O22 gene	ncRNA
chr12-4941	chr12	7095043	7096406	+	10.4	1363	Intergenic	Intergenic	284606	NR_045045	73575	Mm.179463	NR_045045		1700101O22Rik	RIKEN cDNA 1700101O22 gene	ncRNA
chr12-3426	chr12	6837503	6838773	+	10.4	1270	Intergenic	Intergenic	542192	NR_045045	73575	Mm.179463	NR_045045		1700101O22Rik	RIKEN cDNA 1700101O22 gene	ncRNA
chr12-4919	chr12	6697068	6698351	+	10.3	1283	Intergenic	Intergenic	682621	NR_045045	73575	Mm.179463	NR_045045		1700101O22Rik	RIKEN cDNA 1700101O22 gene	ncRNA
chr12-3435	chr12	7630228	7631485	+	10.1	1257	Intergenic	Lx2B2|LINE|L1	-250526	NR_045045	73575	Mm.179463	NR_045045		1700101O22Rik	RIKEN cDNA 1700101O22 gene	ncRNA
chr12-2371	chr12	7576458	7577458	+	8.97	1000	Intergenic	B1_Mur1|SINE|Alu	-196628	NR_045045	73575	Mm.179463	NR_045045		1700101O22Rik	RIKEN cDNA 1700101O22 gene	ncRNA
chr12-2368	chr12	7201444	7202444	+	8.97	1000	Intergenic	Intergenic	178386	NR_045045	73575	Mm.179463	NR_045045		1700101O22Rik	RIKEN cDNA 1700101O22 gene	ncRNA
chr12-4110	chr12	7124812	7125812	+	8.6	1000	Intergenic	Intergenic	255018	NR_045045	73575	Mm.179463	NR_045045		1700101O22Rik	RIKEN cDNA 1700101O22 gene	ncRNA
chr12-2837	chr12	6555196	6556196	+	8.6	1000	Intergenic	Lx|LINE|L1	824634	NR_045045	73575	Mm.179463	NR_045045		1700101O22Rik	RIKEN cDNA 1700101O22 gene	ncRNA
chr12-3429	chr12	6886257	6887257	+	8.6	1000	Intergenic	Intergenic	493573	NR_045045	73575	Mm.179463	NR_045045		1700101O22Rik	RIKEN cDNA 1700101O22 gene	ncRNA
chr12-3430	chr12	6968385	6969385	+	8.6	1000	Intergenic	Intergenic	411445	NR_045045	73575	Mm.179463	NR_045045		1700101O22Rik	RIKEN cDNA 1700101O22 gene	ncRNA
chr12-4113	chr12	7382076	7383076	+	8.42	1000	Intergenic	Intergenic	-2246	NR_045045	73575	Mm.179463	NR_045045		1700101O22Rik	RIKEN cDNA 1700101O22 gene	ncRNA
chr12-4116	chr12	7644718	7645718	+	8.42	1000	Intergenic	L1Md_F|LINE|L1	-264888	NR_045045	73575	Mm.179463	NR_045045		1700101O22Rik	RIKEN cDNA 1700101O22 gene	ncRNA
chr12-4947	chr12	7251569	7252569	+	8.42	1000	Intergenic	Intergenic	128261	NR_045045	73575	Mm.179463	NR_045045		1700101O22Rik	RIKEN cDNA 1700101O22 gene	ncRNA
chr12-3423	chr12	6779029	6780029	+	8.24	1000	Intergenic	RMER17A2|LTR|ERVK	600801	NR_045045	73575	Mm.179463	NR_045045		1700101O22Rik	RIKEN cDNA 1700101O22 gene	ncRNA
chr12-4927	chr12	6791630	6792630	+	8.24	1000	Intergenic	Intergenic	588200	NR_045045	73575	Mm.179463	NR_045045		1700101O22Rik	RIKEN cDNA 1700101O22 gene	ncRNA
chr12-5828	chr12	7418184	7419184	+	8.24	1000	Intergenic	Intergenic	-38354	NR_045045	73575	Mm.179463	NR_045045		1700101O22Rik	RIKEN cDNA 1700101O22 gene	ncRNA
chr12-4943	chr12	7121530	7122530	+	8.24	1000	Intergenic	Intergenic	258300	NR_045045	73575	Mm.179463	NR_045045		1700101O22Rik	RIKEN cDNA 1700101O22 gene	ncRNA
chr12-4109	chr12	7103197	7104197	+	8.24	1000	Intergenic	Intergenic	276633	NR_045045	73575	Mm.179463	NR_045045		1700101O22Rik	RIKEN cDNA 1700101O22 gene	ncRNA
chr12-5802	chr12	6678592	6679592	+	8.24	1000	Intergenic	L1Md_F2|LINE|L1	701238	NR_045045	73575	Mm.179463	NR_045045		1700101O22Rik	RIKEN cDNA 1700101O22 gene	ncRNA
chr12-4938	chr12	6893841	6894841	+	8.05	1000	Intergenic	Intergenic	485989	NR_045045	73575	Mm.179463	NR_045045		1700101O22Rik	RIKEN cDNA 1700101O22 gene	ncRNA
chr12-5794	chr12	6444548	6445548	+	8.05	1000	Intergenic	Intergenic	935282	NR_045045	73575	Mm.179463	NR_045045		1700101O22Rik	RIKEN cDNA 1700101O22 gene	ncRNA
chr12-4105	chr12	6956402	6957402	+	8.05	1000	Intergenic	Intergenic	423428	NR_045045	73575	Mm.179463	NR_045045		1700101O22Rik	RIKEN cDNA 1700101O22 gene	ncRNA
chr12-5793	chr12	6420427	6421427	+	8.05	1000	Intergenic	Intergenic	959403	NR_045045	73575	Mm.179463	NR_045045		1700101O22Rik	RIKEN cDNA 1700101O22 gene	ncRNA
chr12-5816	chr12	6951103	6952103	+	8.05	1000	Intergenic	Intergenic	428727	NR_045045	73575	Mm.179463	NR_045045		1700101O22Rik	RIKEN cDNA 1700101O22 gene	ncRNA
chr12-4107	chr12	7029707	7030707	+	8.05	1000	Intergenic	Intergenic	350123	NR_045045	73575	Mm.179463	NR_045045		1700101O22Rik	RIKEN cDNA 1700101O22 gene	ncRNA
chr12-4909	chr12	6415051	6416051	+	7.87	1000	Intergenic	AT_rich|Low_complexity|Low_complexity	964779	NR_045045	73575	Mm.179463	NR_045045		1700101O22Rik	RIKEN cDNA 1700101O22 gene	ncRNA
chr12-5832	chr12	7674864	7675864	+	7.87	1000	Intergenic	Lx8|LINE|L1	-295034	NR_045045	73575	Mm.179463	NR_045045		1700101O22Rik	RIKEN cDNA 1700101O22 gene	ncRNA
chr12-5826	chr12	7327071	7328071	+	7.69	1000	Intergenic	Intergenic	52759	NR_045045	73575	Mm.179463	NR_045045		1700101O22Rik	RIKEN cDNA 1700101O22 gene	ncRNA
chr12-5805	chr12	6702603	6703603	+	7.69	1000	Intergenic	IAP1-MM_I-int|LTR|ERVK	677227	NR_045045	73575	Mm.179463	NR_045045		1700101O22Rik	RIKEN cDNA 1700101O22 gene	ncRNA
chr12-5818	chr12	7008126	7009126	+	7.69	1000	Intergenic	ORR1A4-int|LTR|ERVL-MaLR	371704	NR_045045	73575	Mm.179463	NR_045045		1700101O22Rik	RIKEN cDNA 1700101O22 gene	ncRNA
chr12-5822	chr12	7198530	7199530	+	7.69	1000	Intergenic	Intergenic	181300	NR_045045	73575	Mm.179463	NR_045045		1700101O22Rik	RIKEN cDNA 1700101O22 gene	ncRNA
chr12-5821	chr12	7132983	7133983	+	7.69	1000	Intergenic	L1MEd|LINE|L1	246847	NR_045045	73575	Mm.179463	NR_045045		1700101O22Rik	RIKEN cDNA 1700101O22 gene	ncRNA
chr12-4914	chr12	6612622	6613622	+	7.14	1000	Intergenic	Intergenic	767208	NR_045045	73575	Mm.179463	NR_045045		1700101O22Rik	RIKEN cDNA 1700101O22 gene	ncRNA
chr17-7760	chr17	3623002	3624970	+	16.8	1968	Intergenic	Intergenic	66162	NR_045302	68230	Mm.431352	NR_045302		1700102H20Rik	RIKEN cDNA 1700102H20 gene	ncRNA
chr17-7759	chr17	3575962	3576962	+	8.05	1000	Intergenic	RLTR11A2|LTR|ERVK	18638	NR_045302	68230	Mm.431352	NR_045302		1700102H20Rik	RIKEN cDNA 1700102H20 gene	ncRNA
chr11-8032	chr11	88310237	88311237	+	8.24	1000	Intergenic	Intergenic	16694	NM_028859	74297	Mm.207320	NM_028859	ENSMUSG00000034031	1700106J16Rik	RIKEN cDNA 1700106J16 gene	protein-coding
chr11-8031	chr11	88299505	88300505	+	8.05	1000	Intergenic	Intergenic	5962	NM_028859	74297	Mm.207320	NM_028859	ENSMUSG00000034031	1700106J16Rik	RIKEN cDNA 1700106J16 gene	protein-coding
chr14-4605	chr14	76808615	76809615	+	8.6	1000	Intergenic	Intergenic	131547	NR_015485	73272	Mm.116804	NR_015485		1700108F19Rik	RIKEN cDNA 1700108F19 gene	ncRNA
chr14-5550	chr14	76746320	76747320	+	8.42	1000	Intergenic	Intergenic	69252	NR_015485	73272	Mm.116804	NR_015485		1700108F19Rik	RIKEN cDNA 1700108F19 gene	ncRNA
chr14-5126	chr14	122273859	122280283	+	49.4	6424	intron (NM_029556, intron 1 of 7)	intron (NM_029556, intron 1 of 7)	-43433	NR_015532	68245	Mm.443285	NR_015532		1700108J01Rik	RIKEN cDNA 1700108J01 gene	ncRNA
chr14-5125	chr14	122229618	122231923	+	21.2	2305	intron (NR_015532, intron 1 of 1)	intron (NR_015532, intron 1 of 1)	2868	NR_015532	68245	Mm.443285	NR_015532		1700108J01Rik	RIKEN cDNA 1700108J01 gene	ncRNA
chr14-9145	chr14	122283674	122285366	+	14.1	1692	intron (NM_029556, intron 1 of 7)	intron (NM_029556, intron 1 of 7)	-50882	NR_015532	68245	Mm.443285	NR_015532		1700108J01Rik	RIKEN cDNA 1700108J01 gene	ncRNA
chr14-7515	chr14	122214700	122215700	+	8.24	1000	intron (NM_029556, intron 1 of 7)	intron (NM_029556, intron 1 of 7)	18438	NR_015532	68245	Mm.443285	NR_015532		1700108J01Rik	RIKEN cDNA 1700108J01 gene	ncRNA
chr14-2974	chr14	39748848	39754585	+	48.5	5737	Intergenic	Intergenic	96053	NR_045936	73591	Mm.65499	NR_045936		1700109I08Rik	RIKEN cDNA 1700109I08 gene	ncRNA
chr14-5367	chr14	39877087	39881964	+	40.3	4877	Intergenic	Intergenic	223862	NR_045936	73591	Mm.65499	NR_045936		1700109I08Rik	RIKEN cDNA 1700109I08 gene	ncRNA
chr14-706	chr14	39598164	39603093	+	39	4929	Intergenic	L1_Mus3|LINE|L1	-55035	NR_045936	73591	Mm.65499	NR_045936		1700109I08Rik	RIKEN cDNA 1700109I08 gene	ncRNA
chr14-5358	chr14	39722595	39726840	+	34.8	4245	Intergenic	Intergenic	69054	NR_045936	73591	Mm.65499	NR_045936		1700109I08Rik	RIKEN cDNA 1700109I08 gene	ncRNA
chr14-6471	chr14	40143380	40147197	+	31.7	3817	Intergenic	Lx|LINE|L1	489625	NR_045936	73591	Mm.65499	NR_045936		1700109I08Rik	RIKEN cDNA 1700109I08 gene	ncRNA
chr14-5355	chr14	39592444	39595760	+	25.4	3316	Intergenic	Lx2B|LINE|L1	-61561	NR_045936	73591	Mm.65499	NR_045936		1700109I08Rik	RIKEN cDNA 1700109I08 gene	ncRNA
chr14-5369	chr14	39976666	39980095	+	24	3429	Intergenic	L1_Mus3|LINE|L1	322717	NR_045936	73591	Mm.65499	NR_045936		1700109I08Rik	RIKEN cDNA 1700109I08 gene	ncRNA
chr14-3654	chr14	40054393	40057151	+	21	2758	Intergenic	Intergenic	400109	NR_045936	73591	Mm.65499	NR_045936		1700109I08Rik	RIKEN cDNA 1700109I08 gene	ncRNA
chr14-7829	chr14	39741748	39744067	+	20.7	2319	Intergenic	Lx8b|LINE|L1	87244	NR_045936	73591	Mm.65499	NR_045936		1700109I08Rik	RIKEN cDNA 1700109I08 gene	ncRNA
chr14-6457	chr14	39567663	39570385	+	20.5	2722	Intergenic	Intergenic	-86639	NR_045936	73591	Mm.65499	NR_045936		1700109I08Rik	RIKEN cDNA 1700109I08 gene	ncRNA
chr14-5357	chr14	39624315	39626787	+	19.6	2472	Intergenic	Lx6|LINE|L1	-30112	NR_045936	73591	Mm.65499	NR_045936		1700109I08Rik	RIKEN cDNA 1700109I08 gene	ncRNA
chr14-5374	chr14	40199638	40201860	+	19	2222	Intergenic	Lx3A|LINE|L1	545086	NR_045936	73591	Mm.65499	NR_045936		1700109I08Rik	RIKEN cDNA 1700109I08 gene	ncRNA
chr14-7839	chr14	40093073	40095361	+	17.9	2288	Intergenic	(TC)n|Simple_repeat|Simple_repeat	438554	NR_045936	73591	Mm.65499	NR_045936		1700109I08Rik	RIKEN cDNA 1700109I08 gene	ncRNA
chr14-4436	chr14	40061176	40063221	+	17.4	2045	Intergenic	Intergenic	406535	NR_045936	73591	Mm.65499	NR_045936		1700109I08Rik	RIKEN cDNA 1700109I08 gene	ncRNA
chr14-2461	chr14	39729076	39731089	+	16.8	2013	Intergenic	Intergenic	74419	NR_045936	73591	Mm.65499	NR_045936		1700109I08Rik	RIKEN cDNA 1700109I08 gene	ncRNA
chr14-1687	chr14	39614679	39616374	+	14.3	1695	Intergenic	Intergenic	-40137	NR_045936	73591	Mm.65499	NR_045936		1700109I08Rik	RIKEN cDNA 1700109I08 gene	ncRNA
chr14-2026	chr14	40087393	40088820	+	13.2	1427	Intergenic	Intergenic	432443	NR_045936	73591	Mm.65499	NR_045936		1700109I08Rik	RIKEN cDNA 1700109I08 gene	ncRNA
chr14-1690	chr14	40072730	40074326	+	13	1596	Intergenic	ORR1A4|LTR|ERVL-MaLR	417865	NR_045936	73591	Mm.65499	NR_045936		1700109I08Rik	RIKEN cDNA 1700109I08 gene	ncRNA
chr14-7827	chr14	39582428	39584086	+	12.8	1658	Intergenic	Lx5c|LINE|L1	-72406	NR_045936	73591	Mm.65499	NR_045936		1700109I08Rik	RIKEN cDNA 1700109I08 gene	ncRNA
chr14-5365	chr14	39855128	39856693	+	12.4	1565	Intergenic	MTD|LTR|ERVL-MaLR	200247	NR_045936	73591	Mm.65499	NR_045936		1700109I08Rik	RIKEN cDNA 1700109I08 gene	ncRNA
chr14-7837	chr14	40015124	40016730	+	12.3	1606	Intergenic	RLTR41|LTR|ERV1	360264	NR_045936	73591	Mm.65499	NR_045936		1700109I08Rik	RIKEN cDNA 1700109I08 gene	ncRNA
chr14-6470	chr14	40078773	40080274	+	12.1	1501	Intergenic	Intergenic	423860	NR_045936	73591	Mm.65499	NR_045936		1700109I08Rik	RIKEN cDNA 1700109I08 gene	ncRNA
chr14-5364	chr14	39823873	39825297	+	11.7	1424	Intergenic	L1Md_F|LINE|L1	168922	NR_045936	73591	Mm.65499	NR_045936		1700109I08Rik	RIKEN cDNA 1700109I08 gene	ncRNA
chr14-1374	chr14	39992448	39993783	+	11	1335	Intergenic	Lx5c|LINE|L1	337452	NR_045936	73591	Mm.65499	NR_045936		1700109I08Rik	RIKEN cDNA 1700109I08 gene	ncRNA
chr14-5368	chr14	39898483	39899786	+	11	1303	Intergenic	RLTR50B|LTR|ERVK	243471	NR_045936	73591	Mm.65499	NR_045936		1700109I08Rik	RIKEN cDNA 1700109I08 gene	ncRNA
chr14-3649	chr14	39700610	39701862	+	10.8	1252	Intergenic	Lx4A|LINE|L1	45573	NR_045936	73591	Mm.65499	NR_045936		1700109I08Rik	RIKEN cDNA 1700109I08 gene	ncRNA
chr14-2463	chr14	39798536	39799795	+	10.8	1259	Intergenic	L1_Mus3|LINE|L1	143502	NR_045936	73591	Mm.65499	NR_045936		1700109I08Rik	RIKEN cDNA 1700109I08 gene	ncRNA
chr14-5361	chr14	39767907	39769243	+	10.6	1336	Intergenic	Intergenic	112912	NR_045936	73591	Mm.65499	NR_045936		1700109I08Rik	RIKEN cDNA 1700109I08 gene	ncRNA
chr14-5363	chr14	39808146	39809498	+	10.6	1352	Intergenic	L1_Mur3|LINE|L1	153159	NR_045936	73591	Mm.65499	NR_045936		1700109I08Rik	RIKEN cDNA 1700109I08 gene	ncRNA
chr14-2024	chr14	39948029	39949300	+	10.6	1271	Intergenic	Intergenic	293001	NR_045936	73591	Mm.65499	NR_045936		1700109I08Rik	RIKEN cDNA 1700109I08 gene	ncRNA
chr14-2027	chr14	40206741	40208016	+	10.4	1275	Intergenic	Lx3A|LINE|L1	551715	NR_045936	73591	Mm.65499	NR_045936		1700109I08Rik	RIKEN cDNA 1700109I08 gene	ncRNA
chr14-5372	chr14	40040191	40041490	+	10.1	1299	Intergenic	Intergenic	385177	NR_045936	73591	Mm.65499	NR_045936		1700109I08Rik	RIKEN cDNA 1700109I08 gene	ncRNA
chr14-7826	chr14	39577769	39579070	+	9.7	1301	Intergenic	L3|LINE|CR1	-77244	NR_045936	73591	Mm.65499	NR_045936		1700109I08Rik	RIKEN cDNA 1700109I08 gene	ncRNA
chr14-2025	chr14	39999980	40000980	+	9.15	1000	Intergenic	L1M4b|LINE|L1	344817	NR_045936	73591	Mm.65499	NR_045936		1700109I08Rik	RIKEN cDNA 1700109I08 gene	ncRNA
chr14-4439	chr14	40216867	40217867	+	8.79	1000	Intergenic	L1MB5|LINE|L1	561704	NR_045936	73591	Mm.65499	NR_045936		1700109I08Rik	RIKEN cDNA 1700109I08 gene	ncRNA
chr14-3650	chr14	39792641	39793641	+	8.79	1000	Intergenic	RLTR25A|LTR|ERVK	137478	NR_045936	73591	Mm.65499	NR_045936		1700109I08Rik	RIKEN cDNA 1700109I08 gene	ncRNA
chr14-4440	chr14	40224257	40225257	+	8.42	1000	Intergenic	Intergenic	569094	NR_045936	73591	Mm.65499	NR_045936		1700109I08Rik	RIKEN cDNA 1700109I08 gene	ncRNA
chr14-5354	chr14	39571933	39572933	+	8.24	1000	Intergenic	Intergenic	-83230	NR_045936	73591	Mm.65499	NR_045936		1700109I08Rik	RIKEN cDNA 1700109I08 gene	ncRNA
chr14-6462	chr14	39633935	39634935	+	7.87	1000	Intergenic	L1_Mus3|LINE|L1	-21228	NR_045936	73591	Mm.65499	NR_045936		1700109I08Rik	RIKEN cDNA 1700109I08 gene	ncRNA
chr14-7832	chr14	39859727	39860727	+	7.87	1000	Intergenic	ORR1D2|LTR|ERVL-MaLR	204564	NR_045936	73591	Mm.65499	NR_045936		1700109I08Rik	RIKEN cDNA 1700109I08 gene	ncRNA
chr14-5373	chr14	40116987	40117987	+	7.87	1000	Intergenic	Intergenic	461824	NR_045936	73591	Mm.65499	NR_045936		1700109I08Rik	RIKEN cDNA 1700109I08 gene	ncRNA
chr14-6466	chr14	39819790	39820790	+	7.69	1000	Intergenic	RLTR10-int|LTR|ERVK	164627	NR_045936	73591	Mm.65499	NR_045936		1700109I08Rik	RIKEN cDNA 1700109I08 gene	ncRNA
chr14-6468	chr14	39987994	39988994	+	7.32	1000	Intergenic	Intergenic	332831	NR_045936	73591	Mm.65499	NR_045936		1700109I08Rik	RIKEN cDNA 1700109I08 gene	ncRNA
chr14-7833	chr14	39872086	39873086	+	7.32	1000	Intergenic	MLT1E1|LTR|ERVL-MaLR	216923	NR_045936	73591	Mm.65499	NR_045936		1700109I08Rik	RIKEN cDNA 1700109I08 gene	ncRNA
chr14-5223	chr14	22167386	22169632	+	20.7	2246	intron (NM_028275, intron 2 of 6)	intron (NM_028275, intron 2 of 6)	148797	NM_028275	76633	Mm.489898	NM_028275	ENSMUSG00000063458	1700112E06Rik	RIKEN cDNA 1700112E06 gene	protein-coding
chr14-5221	chr14	22035844	22037870	+	18.3	2026	intron (NM_028275, intron 2 of 6)	intron (NM_028275, intron 2 of 6)	17145	NM_028275	76633	Mm.489898	NM_028275	ENSMUSG00000063458	1700112E06Rik	RIKEN cDNA 1700112E06 gene	protein-coding
chr14-2898	chr14	22157754	22159346	+	13	1592	intron (NM_028275, intron 2 of 6)	intron (NM_028275, intron 2 of 6)	138838	NM_028275	76633	Mm.489898	NM_028275	ENSMUSG00000063458	1700112E06Rik	RIKEN cDNA 1700112E06 gene	protein-coding
chr14-3557	chr14	22016401	22017992	+	12.4	1591	Intergenic	Intergenic	-2516	NM_028275	76633	Mm.489898	NM_028275	ENSMUSG00000063458	1700112E06Rik	RIKEN cDNA 1700112E06 gene	protein-coding
chr14-6335	chr14	22087854	22089291	+	11.2	1437	intron (NM_028275, intron 2 of 6)	intron (NM_028275, intron 2 of 6)	68860	NM_028275	76633	Mm.489898	NM_028275	ENSMUSG00000063458	1700112E06Rik	RIKEN cDNA 1700112E06 gene	protein-coding
chr14-3560	chr14	22094801	22096079	+	10.8	1278	intron (NM_028275, intron 2 of 6)	intron (NM_028275, intron 2 of 6)	75728	NM_028275	76633	Mm.489898	NM_028275	ENSMUSG00000063458	1700112E06Rik	RIKEN cDNA 1700112E06 gene	protein-coding
chr14-2405	chr14	22212212	22213212	+	8.79	1000	intron (NM_028275, intron 2 of 6)	(CA)n|Simple_repeat|Simple_repeat	193000	NM_028275	76633	Mm.489898	NM_028275	ENSMUSG00000063458	1700112E06Rik	RIKEN cDNA 1700112E06 gene	protein-coding
chr14-7669	chr14	22247946	22248946	+	8.05	1000	intron (NM_028275, intron 2 of 6)	intron (NM_028275, intron 2 of 6)	228734	NM_028275	76633	Mm.489898	NM_028275	ENSMUSG00000063458	1700112E06Rik	RIKEN cDNA 1700112E06 gene	protein-coding
chr14-7667	chr14	22081880	22082880	+	7.87	1000	intron (NM_028275, intron 2 of 6)	intron (NM_028275, intron 2 of 6)	62668	NM_028275	76633	Mm.489898	NM_028275	ENSMUSG00000063458	1700112E06Rik	RIKEN cDNA 1700112E06 gene	protein-coding
chr14-7666	chr14	22074113	22075113	+	7.87	1000	intron (NM_028275, intron 2 of 6)	intron (NM_028275, intron 2 of 6)	54901	NM_028275	76633	Mm.489898	NM_028275	ENSMUSG00000063458	1700112E06Rik	RIKEN cDNA 1700112E06 gene	protein-coding
chr1-9965	chr1	184483454	184486984	+	27.3	3530	Intergenic	Intergenic	72472	NR_040472	73590	Mm.82792	NR_040472		1700112H15Rik	RIKEN cDNA 1700112H15 gene	ncRNA
chr1-6032	chr1	184576990	184578680	+	14.3	1690	Intergenic	RMER19B|LTR|ERVK	-20144	NR_040472	73590	Mm.82792	NR_040472		1700112H15Rik	RIKEN cDNA 1700112H15 gene	ncRNA
chr1-16456	chr1	184565485	184566485	+	8.05	1000	Intergenic	Intergenic	-8294	NR_040472	73590	Mm.82792	NR_040472		1700112H15Rik	RIKEN cDNA 1700112H15 gene	ncRNA
chr1-16455	chr1	184478553	184479553	+	7.69	1000	Intergenic	RLTR12BD_Mm|LTR|ERVK	78638	NR_040472	73590	Mm.82792	NR_040472		1700112H15Rik	RIKEN cDNA 1700112H15 gene	ncRNA
chr1-16454	chr1	184303329	184304329	+	7.69	1000	Intergenic	Intergenic	253862	NR_040472	73590	Mm.82792	NR_040472		1700112H15Rik	RIKEN cDNA 1700112H15 gene	ncRNA
chr5-6308	chr5	77053618	77056589	+	23.4	2971	intron (NM_027970, intron 5 of 8)	L1M3|LINE|L1	-36240	NR_077218	68246	Mm.319633	NR_077218	ENSMUSG00000086632	1700112J05Rik	RIKEN cDNA 1700112J05 gene	ncRNA
chr5-9802	chr5	77017424	77018942	+	13.7	1518	intron (NR_077218, intron 1 of 3)	intron (NR_077218, intron 1 of 3)	680	NR_077218	68246	Mm.319633	NR_077218	ENSMUSG00000086632	1700112J05Rik	RIKEN cDNA 1700112J05 gene	ncRNA
chr5-8421	chr5	77025180	77026435	+	9.88	1255	intron (NM_027970, intron 1 of 8)	intron (NM_027970, intron 1 of 8)	-6944	NR_077218	68246	Mm.319633	NR_077218	ENSMUSG00000086632	1700112J05Rik	RIKEN cDNA 1700112J05 gene	ncRNA
chr3-7520	chr3	88181694	88183673	+	16.7	1979	Intergenic	Intergenic	-4898	NR_045997	76642	Mm.424420	NR_045997	ENSMUSG00000096935	1700113A16Rik	RIKEN cDNA 1700113A16 gene	ncRNA
chr3-12668	chr3	88189666	88190666	+	8.05	1000	Intergenic	Intergenic	-12381	NR_045997	76642	Mm.424420	NR_045997	ENSMUSG00000096935	1700113A16Rik	RIKEN cDNA 1700113A16 gene	ncRNA
chr10-8472	chr10	87137556	87141499	+	33.9	3943	intron (NM_029685, intron 3 of 5)	intron (NM_029685, intron 3 of 5)	81481	NM_029685	76640	Mm.78423	NM_029685	ENSMUSG00000047129	1700113H08Rik	RIKEN cDNA 1700113H08 gene	protein-coding
chr10-6036	chr10	87146390	87149776	+	31.1	3386	intron (NM_029685, intron 3 of 5)	HAL1ME|LINE|L1	90037	NM_029685	76640	Mm.78423	NM_029685	ENSMUSG00000047129	1700113H08Rik	RIKEN cDNA 1700113H08 gene	protein-coding
chr10-9965	chr10	87216513	87218170	+	13.2	1657	intron (NM_029685, intron 4 of 5)	intron (NM_029685, intron 4 of 5)	159295	NM_029685	76640	Mm.78423	NM_029685	ENSMUSG00000047129	1700113H08Rik	RIKEN cDNA 1700113H08 gene	protein-coding
chr10-6035	chr10	87130699	87131699	+	8.42	1000	intron (NM_029685, intron 3 of 5)	RLTR24|LTR|ERV1	73153	NM_029685	76640	Mm.78423	NM_029685	ENSMUSG00000047129	1700113H08Rik	RIKEN cDNA 1700113H08 gene	protein-coding
chr16-4523	chr16	34900160	34901160	+	8.24	1000	intron (NM_139300, intron 11 of 31)	intron (NM_139300, intron 11 of 31)	38669	NR_040536	76649	Mm.420532	NR_040536		1700119H24Rik	RIKEN cDNA 1700119H24 gene	ncRNA
chr7-14875	chr7	127607743	127610800	+	26.4	3057	3' UTR (NM_177226, exon 3 of 3)	3' UTR (NM_177226, exon 3 of 3)	-4826	NR_027915	68232	Mm.347960	NM_026628		1700120K04Rik	RIKEN cDNA 1700120K04 gene	ncRNA
chr12-1623	chr12	106304801	106307626	+	23.6	2825	Intergenic	Intergenic	141453	NR_036593	76639	Mm.375609	NR_036593	ENSMUSG00000092066	1700121N20Rik	RIKEN cDNA 1700121N20 gene	ncRNA
chr12-1913	chr12	106375624	106377323	+	14.1	1699	Intergenic	Intergenic	71193	NR_036593	76639	Mm.375609	NR_036593	ENSMUSG00000092066	1700121N20Rik	RIKEN cDNA 1700121N20 gene	ncRNA
chr12-4725	chr12	106262005	106263586	+	13.2	1581	Intergenic	Intergenic	184871	NR_036593	76639	Mm.375609	NR_036593	ENSMUSG00000092066	1700121N20Rik	RIKEN cDNA 1700121N20 gene	ncRNA
chr12-5632	chr12	106381030	106382670	+	13	1640	Intergenic	Intergenic	65816	NR_036593	76639	Mm.375609	NR_036593	ENSMUSG00000092066	1700121N20Rik	RIKEN cDNA 1700121N20 gene	ncRNA
chr12-6759	chr12	106265223	106266223	+	8.05	1000	Intergenic	L2a|LINE|L2	181943	NR_036593	76639	Mm.375609	NR_036593	ENSMUSG00000092066	1700121N20Rik	RIKEN cDNA 1700121N20 gene	ncRNA
chr12-6760	chr12	106338430	106339430	+	7.5	1000	Intergenic	Intergenic	108736	NR_036593	76639	Mm.375609	NR_036593	ENSMUSG00000092066	1700121N20Rik	RIKEN cDNA 1700121N20 gene	ncRNA
chr17-8415	chr17	48054863	48060676	+	54	5813	Intergenic	Intergenic	-19476	NM_029689	76651	Mm.76918	NM_029689	ENSMUSG00000094928	1700122O11Rik	RIKEN cDNA 1700122O11 gene	protein-coding
chr17-1177	chr17	48047113	48051815	+	47.4	4702	Intergenic	Intergenic	-11171	NM_029689	76651	Mm.76918	NM_029689	ENSMUSG00000094928	1700122O11Rik	RIKEN cDNA 1700122O11 gene	protein-coding
chr19-1386	chr19	6181973	6185316	+	22.5	3343	promoter-TSS (NM_001165919)	promoter-TSS (NM_001165919)	-766	NM_001165919	622554	Mm.159757	NM_001165919	ENSMUSG00000024786	1700123I01Rik	RIKEN cDNA 1700123I01 gene	protein-coding
chr5-18597	chr5	138563423	138564423	+	8.05	1000	intron (NM_029693, intron 2 of 5)	MurSAT1|Satellite|Satellite	771	NM_029693	76658	Mm.73235	NM_029693	ENSMUSG00000029526	1700123K08Rik	RIKEN cDNA 1700123K08 gene	protein-coding
chr6-9067	chr6	96300620	96302035	+	11.9	1415	intron (NM_182808, intron 2 of 4)	intron (NM_182808, intron 2 of 4)	-135122	NR_003643	78482	Mm.391486	NM_030107	ENSMUSG00000072878	1700123L14Rik	nucleoporin 50 pseudogene	pseudo
chr6-3802	chr6	96362533	96363533	+	9.33	1000	intron (NM_182808, intron 2 of 4)	intron (NM_182808, intron 2 of 4)	-196828	NR_003643	78482	Mm.391486	NM_030107	ENSMUSG00000072878	1700123L14Rik	nucleoporin 50 pseudogene	pseudo
chr6-7615	chr6	96316468	96317468	+	8.42	1000	intron (NM_182808, intron 2 of 4)	L1MC1|LINE|L1	-150763	NR_003643	78482	Mm.391486	NM_030107	ENSMUSG00000072878	1700123L14Rik	nucleoporin 50 pseudogene	pseudo
chr6-12737	chr6	96359040	96360040	+	7.87	1000	intron (NM_182808, intron 2 of 4)	B4A|SINE|B4	-193335	NR_003643	78482	Mm.391486	NM_030107	ENSMUSG00000072878	1700123L14Rik	nucleoporin 50 pseudogene	pseudo
chr4-9799	chr4	10812372	10814921	+	20.3	2549	Intergenic	Intergenic	-15844	NR_045185	73624	Mm.67392	NR_045185	ENSMUSG00000086080	1700123O12Rik	RIKEN cDNA 1700123O12 gene	ncRNA
chr4-8432	chr4	10480020	10481020	+	8.6	1000	Intergenic	Intergenic	317282	NR_045185	73624	Mm.67392	NR_045185	ENSMUSG00000086080	1700123O12Rik	RIKEN cDNA 1700123O12 gene	ncRNA
chr4-8433	chr4	10589410	10590410	+	8.6	1000	intron (NR_045185, intron 4 of 4)	Lx5c|LINE|L1	207892	NR_045185	73624	Mm.67392	NR_045185	ENSMUSG00000086080	1700123O12Rik	RIKEN cDNA 1700123O12 gene	ncRNA
chr4-11407	chr4	10638823	10639823	+	7.69	1000	intron (NR_045185, intron 4 of 4)	L1Md_F|LINE|L1	158479	NR_045185	73624	Mm.67392	NR_045185	ENSMUSG00000086080	1700123O12Rik	RIKEN cDNA 1700123O12 gene	ncRNA
chr6-1595	chr6	83759671	83764120	+	36.6	4449	promoter-TSS (NM_029245)	promoter-TSS (NM_029245)	613	NR_105027	67934	Mm.126190	NR_105027		1700124L16Rik	RIKEN cDNA 1700124L16 gene	ncRNA
chr4-12741	chr4	124893235	124899457	+	55.8	6222	intron (NM_001256432, intron 5 of 16)	intron (NM_001256432, intron 5 of 16)	-1564	NR_040651	73628	Mm.398337	NR_040651	ENSMUSG00000085263	1700125G02Rik	RIKEN cDNA 1700125G02 gene	ncRNA
chr4-8055	chr4	124901262	124903433	+	17.8	2171	intron (NM_001256432, intron 6 of 16)	intron (NM_001256432, intron 6 of 16)	-7565	NR_040651	73628	Mm.398337	NR_040651	ENSMUSG00000085263	1700125G02Rik	RIKEN cDNA 1700125G02 gene	ncRNA
chr4-10940	chr4	124910656	124911656	+	8.24	1000	intron (NM_001256432, intron 8 of 16)	ORR1A2|LTR|ERVL-MaLR	-16374	NR_040651	73628	Mm.398337	NR_040651	ENSMUSG00000085263	1700125G02Rik	RIKEN cDNA 1700125G02 gene	ncRNA
chr14-7220	chr14	107687562	107691836	+	35.3	4274	Intergenic	Lx3C|LINE|L1	-1203179	NR_045938	73631	Mm.48862	NR_045938		1700128A07Rik	RIKEN cDNA 1700128A07 gene	ncRNA
chr14-4060	chr14	106713971	106718626	+	34	4655	Intergenic	Intergenic	-229778	NR_045938	73631	Mm.48862	NR_045938		1700128A07Rik	RIKEN cDNA 1700128A07 gene	ncRNA
chr14-7207	chr14	106777520	106781472	+	30.2	3952	Intergenic	Lx8b|LINE|L1	-292976	NR_045938	73631	Mm.48862	NR_045938		1700128A07Rik	RIKEN cDNA 1700128A07 gene	ncRNA
chr14-809	chr14	106354009	106357334	+	26.5	3325	Intergenic	Intergenic	130849	NR_045938	73631	Mm.48862	NR_045938		1700128A07Rik	RIKEN cDNA 1700128A07 gene	ncRNA
chr14-4061	chr14	106820992	106823781	+	23.2	2789	Intergenic	Intergenic	-335866	NR_045938	73631	Mm.48862	NR_045938		1700128A07Rik	RIKEN cDNA 1700128A07 gene	ncRNA
chr14-7205	chr14	106685505	106688207	+	22.5	2702	Intergenic	Intergenic	-200336	NR_045938	73631	Mm.48862	NR_045938		1700128A07Rik	RIKEN cDNA 1700128A07 gene	ncRNA
chr14-1881	chr14	106830219	106832553	+	21	2334	Intergenic	Intergenic	-344866	NR_045938	73631	Mm.48862	NR_045938		1700128A07Rik	RIKEN cDNA 1700128A07 gene	ncRNA
chr14-8729	chr14	107552199	107554935	+	20.5	2736	Intergenic	Intergenic	-1067047	NR_045938	73631	Mm.48862	NR_045938		1700128A07Rik	RIKEN cDNA 1700128A07 gene	ncRNA
chr14-7202	chr14	106598681	106601218	+	20.3	2537	Intergenic	RMER19A|LTR|ERVK	-113429	NR_045938	73631	Mm.48862	NR_045938		1700128A07Rik	RIKEN cDNA 1700128A07 gene	ncRNA
chr14-8730	chr14	107569295	107571941	+	19.8	2646	Intergenic	Lx8b|LINE|L1	-1084098	NR_045938	73631	Mm.48862	NR_045938		1700128A07Rik	RIKEN cDNA 1700128A07 gene	ncRNA
chr14-4058	chr14	106695010	106697145	+	19.2	2135	Intergenic	Intergenic	-209557	NR_045938	73631	Mm.48862	NR_045938		1700128A07Rik	RIKEN cDNA 1700128A07 gene	ncRNA
chr14-7215	chr14	107001867	107003797	+	17.6	1930	Intergenic	MTE-int|LTR|ERVL-MaLR	-516312	NR_045938	73631	Mm.48862	NR_045938		1700128A07Rik	RIKEN cDNA 1700128A07 gene	ncRNA
chr14-7199	chr14	106400209	106402218	+	17	2009	Intergenic	Lx8|LINE|L1	85307	NR_045938	73631	Mm.48862	NR_045938		1700128A07Rik	RIKEN cDNA 1700128A07 gene	ncRNA
chr14-8723	chr14	107353486	107355392	+	15.7	1906	Intergenic	MLT1J-int|LTR|ERVL-MaLR	-867919	NR_045938	73631	Mm.48862	NR_045938		1700128A07Rik	RIKEN cDNA 1700128A07 gene	ncRNA
chr14-8722	chr14	107284099	107285808	+	15	1709	Intergenic	ORR1B2|LTR|ERVL-MaLR	-798433	NR_045938	73631	Mm.48862	NR_045938		1700128A07Rik	RIKEN cDNA 1700128A07 gene	ncRNA
chr14-1249	chr14	106360349	106362093	+	14.8	1744	Intergenic	Intergenic	125299	NR_045938	73631	Mm.48862	NR_045938		1700128A07Rik	RIKEN cDNA 1700128A07 gene	ncRNA
chr14-5945	chr14	106838413	106840107	+	13.4	1694	Intergenic	Intergenic	-352740	NR_045938	73631	Mm.48862	NR_045938		1700128A07Rik	RIKEN cDNA 1700128A07 gene	ncRNA
chr14-4055	chr14	106514395	106515988	+	13.2	1593	Intergenic	Lx8|LINE|L1	-28671	NR_045938	73631	Mm.48862	NR_045938		1700128A07Rik	RIKEN cDNA 1700128A07 gene	ncRNA
chr14-5933	chr14	106321976	106323569	+	13	1593	Intergenic	Intergenic	163748	NR_045938	73631	Mm.48862	NR_045938		1700128A07Rik	RIKEN cDNA 1700128A07 gene	ncRNA
chr14-4904	chr14	106607933	106609455	+	12.8	1522	Intergenic	Intergenic	-122174	NR_045938	73631	Mm.48862	NR_045938		1700128A07Rik	RIKEN cDNA 1700128A07 gene	ncRNA
chr14-5952	chr14	107480234	107481888	+	12.4	1654	Intergenic	Intergenic	-994541	NR_045938	73631	Mm.48862	NR_045938		1700128A07Rik	RIKEN cDNA 1700128A07 gene	ncRNA
chr14-4912	chr14	107058111	107059658	+	11.9	1547	Intergenic	Lx3_Mus|LINE|L1	-572364	NR_045938	73631	Mm.48862	NR_045938		1700128A07Rik	RIKEN cDNA 1700128A07 gene	ncRNA
chr14-4914	chr14	107389353	107390794	+	11.5	1441	Intergenic	Lx7|LINE|L1	-903553	NR_045938	73631	Mm.48862	NR_045938		1700128A07Rik	RIKEN cDNA 1700128A07 gene	ncRNA
chr14-8721	chr14	106952133	106953414	+	11.3	1281	Intergenic	Lx7|LINE|L1	-466253	NR_045938	73631	Mm.48862	NR_045938		1700128A07Rik	RIKEN cDNA 1700128A07 gene	ncRNA
chr14-7200	chr14	106501312	106502600	+	11.2	1288	Intergenic	Intergenic	-15436	NR_045938	73631	Mm.48862	NR_045938		1700128A07Rik	RIKEN cDNA 1700128A07 gene	ncRNA
chr14-7212	chr14	106919843	106921241	+	11.2	1398	Intergenic	Intergenic	-434022	NR_045938	73631	Mm.48862	NR_045938		1700128A07Rik	RIKEN cDNA 1700128A07 gene	ncRNA
chr14-7219	chr14	107670661	107671992	+	10.8	1331	Intergenic	Intergenic	-1184806	NR_045938	73631	Mm.48862	NR_045938		1700128A07Rik	RIKEN cDNA 1700128A07 gene	ncRNA
chr14-4906	chr14	106710795	106712063	+	10.6	1268	Intergenic	Intergenic	-224909	NR_045938	73631	Mm.48862	NR_045938		1700128A07Rik	RIKEN cDNA 1700128A07 gene	ncRNA
chr14-8710	chr14	106347666	106348971	+	10.3	1305	Intergenic	Intergenic	138202	NR_045938	73631	Mm.48862	NR_045938		1700128A07Rik	RIKEN cDNA 1700128A07 gene	ncRNA
chr14-8718	chr14	106859917	106861232	+	9.7	1315	Intergenic	Intergenic	-374054	NR_045938	73631	Mm.48862	NR_045938		1700128A07Rik	RIKEN cDNA 1700128A07 gene	ncRNA
chr14-3333	chr14	106814776	106815776	+	9.15	1000	Intergenic	Intergenic	-328756	NR_045938	73631	Mm.48862	NR_045938		1700128A07Rik	RIKEN cDNA 1700128A07 gene	ncRNA
chr14-4063	chr14	107178805	107179805	+	8.97	1000	Intergenic	Intergenic	-692785	NR_045938	73631	Mm.48862	NR_045938		1700128A07Rik	RIKEN cDNA 1700128A07 gene	ncRNA
chr14-2271	chr14	107303571	107304571	+	8.79	1000	Intergenic	Intergenic	-817551	NR_045938	73631	Mm.48862	NR_045938		1700128A07Rik	RIKEN cDNA 1700128A07 gene	ncRNA
chr14-4915	chr14	107436763	107437763	+	8.79	1000	Intergenic	Intergenic	-950743	NR_045938	73631	Mm.48862	NR_045938		1700128A07Rik	RIKEN cDNA 1700128A07 gene	ncRNA
chr14-4059	chr14	106706951	106707951	+	8.6	1000	Intergenic	Lx8|LINE|L1	-220931	NR_045938	73631	Mm.48862	NR_045938		1700128A07Rik	RIKEN cDNA 1700128A07 gene	ncRNA
chr14-4911	chr14	106916967	106917967	+	8.6	1000	Intergenic	Intergenic	-430947	NR_045938	73631	Mm.48862	NR_045938		1700128A07Rik	RIKEN cDNA 1700128A07 gene	ncRNA
chr14-4910	chr14	106783729	106784729	+	8.6	1000	Intergenic	Lx3A|LINE|L1	-297709	NR_045938	73631	Mm.48862	NR_045938		1700128A07Rik	RIKEN cDNA 1700128A07 gene	ncRNA
chr14-5938	chr14	106649497	106650497	+	8.6	1000	Intergenic	URR1A|DNA|hAT-Charlie	-163477	NR_045938	73631	Mm.48862	NR_045938		1700128A07Rik	RIKEN cDNA 1700128A07 gene	ncRNA
chr14-5949	chr14	107150984	107151984	+	8.42	1000	Intergenic	Lx8b|LINE|L1	-664964	NR_045938	73631	Mm.48862	NR_045938		1700128A07Rik	RIKEN cDNA 1700128A07 gene	ncRNA
chr14-7216	chr14	107068702	107069702	+	8.42	1000	Intergenic	Lx7|LINE|L1	-582682	NR_045938	73631	Mm.48862	NR_045938		1700128A07Rik	RIKEN cDNA 1700128A07 gene	ncRNA
chr14-4913	chr14	107246284	107247284	+	8.42	1000	Intergenic	Intergenic	-760264	NR_045938	73631	Mm.48862	NR_045938		1700128A07Rik	RIKEN cDNA 1700128A07 gene	ncRNA
chr14-4056	chr14	106529470	106530470	+	8.42	1000	Intergenic	Intergenic	-43450	NR_045938	73631	Mm.48862	NR_045938		1700128A07Rik	RIKEN cDNA 1700128A07 gene	ncRNA
chr14-5940	chr14	106766986	106767986	+	8.24	1000	Intergenic	RMER1B|Other|Other	-280966	NR_045938	73631	Mm.48862	NR_045938		1700128A07Rik	RIKEN cDNA 1700128A07 gene	ncRNA
chr14-4902	chr14	106520787	106521787	+	8.24	1000	Intergenic	Intergenic	-34767	NR_045938	73631	Mm.48862	NR_045938		1700128A07Rik	RIKEN cDNA 1700128A07 gene	ncRNA
chr14-5946	chr14	106891729	106892729	+	8.24	1000	Intergenic	Intergenic	-405709	NR_045938	73631	Mm.48862	NR_045938		1700128A07Rik	RIKEN cDNA 1700128A07 gene	ncRNA
chr14-8724	chr14	107424010	107425010	+	8.24	1000	Intergenic	L1_Mur1|LINE|L1	-937990	NR_045938	73631	Mm.48862	NR_045938		1700128A07Rik	RIKEN cDNA 1700128A07 gene	ncRNA
chr14-7211	chr14	106877478	106878478	+	8.24	1000	Intergenic	Lx9|LINE|L1	-391458	NR_045938	73631	Mm.48862	NR_045938		1700128A07Rik	RIKEN cDNA 1700128A07 gene	ncRNA
chr14-7217	chr14	107475561	107476561	+	8.24	1000	Intergenic	L1_Mus2|LINE|L1	-989541	NR_045938	73631	Mm.48862	NR_045938		1700128A07Rik	RIKEN cDNA 1700128A07 gene	ncRNA
chr14-4066	chr14	107518136	107519136	+	8.24	1000	Intergenic	Intergenic	-1032116	NR_045938	73631	Mm.48862	NR_045938		1700128A07Rik	RIKEN cDNA 1700128A07 gene	ncRNA
chr14-5936	chr14	106560298	106561298	+	8.24	1000	Intergenic	Lx2A1|LINE|L1	-74278	NR_045938	73631	Mm.48862	NR_045938		1700128A07Rik	RIKEN cDNA 1700128A07 gene	ncRNA
chr14-7201	chr14	106553353	106554353	+	8.24	1000	Intergenic	Lx8b|LINE|L1	-67333	NR_045938	73631	Mm.48862	NR_045938		1700128A07Rik	RIKEN cDNA 1700128A07 gene	ncRNA
chr14-8726	chr14	107488472	107489472	+	8.05	1000	Intergenic	MTEa-int|LTR|ERVL-MaLR	-1002452	NR_045938	73631	Mm.48862	NR_045938		1700128A07Rik	RIKEN cDNA 1700128A07 gene	ncRNA
chr14-8720	chr14	106865952	106866952	+	8.05	1000	Intergenic	Intergenic	-379932	NR_045938	73631	Mm.48862	NR_045938		1700128A07Rik	RIKEN cDNA 1700128A07 gene	ncRNA
chr14-8713	chr14	106636882	106637882	+	8.05	1000	Intergenic	Intergenic	-150862	NR_045938	73631	Mm.48862	NR_045938		1700128A07Rik	RIKEN cDNA 1700128A07 gene	ncRNA
chr14-7218	chr14	107561226	107562226	+	8.05	1000	Intergenic	Intergenic	-1075206	NR_045938	73631	Mm.48862	NR_045938		1700128A07Rik	RIKEN cDNA 1700128A07 gene	ncRNA
chr14-5950	chr14	107316092	107317092	+	8.05	1000	Intergenic	Lx4A|LINE|L1	-830072	NR_045938	73631	Mm.48862	NR_045938		1700128A07Rik	RIKEN cDNA 1700128A07 gene	ncRNA
chr14-8728	chr14	107527848	107528848	+	8.05	1000	Intergenic	RLTR13D3|LTR|ERVK	-1041828	NR_045938	73631	Mm.48862	NR_045938		1700128A07Rik	RIKEN cDNA 1700128A07 gene	ncRNA
chr14-7214	chr14	106997523	106998523	+	8.05	1000	Intergenic	Lx8|LINE|L1	-511503	NR_045938	73631	Mm.48862	NR_045938		1700128A07Rik	RIKEN cDNA 1700128A07 gene	ncRNA
chr14-7213	chr14	106938099	106939099	+	8.05	1000	Intergenic	RMER17C|LTR|ERVK	-452079	NR_045938	73631	Mm.48862	NR_045938		1700128A07Rik	RIKEN cDNA 1700128A07 gene	ncRNA
chr14-8732	chr14	107577407	107578407	+	7.87	1000	Intergenic	Lx|LINE|L1	-1091387	NR_045938	73631	Mm.48862	NR_045938		1700128A07Rik	RIKEN cDNA 1700128A07 gene	ncRNA
chr14-8712	chr14	106628694	106629694	+	7.87	1000	Intergenic	Intergenic	-142674	NR_045938	73631	Mm.48862	NR_045938		1700128A07Rik	RIKEN cDNA 1700128A07 gene	ncRNA
chr14-8727	chr14	107495471	107496471	+	7.87	1000	Intergenic	L1_Mur3|LINE|L1	-1009451	NR_045938	73631	Mm.48862	NR_045938		1700128A07Rik	RIKEN cDNA 1700128A07 gene	ncRNA
chr14-8714	chr14	106677367	106678367	+	7.87	1000	Intergenic	Intergenic	-191347	NR_045938	73631	Mm.48862	NR_045938		1700128A07Rik	RIKEN cDNA 1700128A07 gene	ncRNA
chr14-7204	chr14	106663132	106664132	+	7.69	1000	Intergenic	Intergenic	-177112	NR_045938	73631	Mm.48862	NR_045938		1700128A07Rik	RIKEN cDNA 1700128A07 gene	ncRNA
chr14-8733	chr14	107593008	107594008	+	7.69	1000	Intergenic	Intergenic	-1106988	NR_045938	73631	Mm.48862	NR_045938		1700128A07Rik	RIKEN cDNA 1700128A07 gene	ncRNA
chr14-8734	chr14	107676369	107677369	+	7.32	1000	Intergenic	Intergenic	-1190349	NR_045938	73631	Mm.48862	NR_045938		1700128A07Rik	RIKEN cDNA 1700128A07 gene	ncRNA
chr9-8029	chr9	8222496	8226122	+	29.5	3626	intron (NR_033618, intron 1 of 2)	RMER4B|LTR|ERVK	2420	NR_033618	76669	Mm.491041	NM_029697	ENSMUSG00000031998	1700128F08Rik	U1-snRNP binding protein homolog pseudogene	pseudo
chr9-2540	chr9	8218106	8220105	+	17.8	1999	Intergenic	Lx2B2|LINE|L1	-2784	NR_033618	76669	Mm.491041	NM_029697	ENSMUSG00000031998	1700128F08Rik	U1-snRNP binding protein homolog pseudogene	pseudo
chr14-7993	chr14	59027720	59028720	+	8.24	1000	Intergenic	MTE2a|LTR|ERVL-MaLR	114673	NM_026461	67932	Mm.65550	NM_026461	ENSMUSG00000021977	1700129C05Rik	RIKEN cDNA 1700129C05 gene	protein-coding
chr14-7992	chr14	58891677	58892677	+	8.05	1000	Intergenic	L1ME2|LINE|L1	250716	NM_026461	67932	Mm.65550	NM_026461	ENSMUSG00000021977	1700129C05Rik	RIKEN cDNA 1700129C05 gene	protein-coding
chr14-5475	chr14	58904060	58905060	+	7.87	1000	Intergenic	L1MEg|LINE|L1	238333	NM_026461	67932	Mm.65550	NM_026461	ENSMUSG00000021977	1700129C05Rik	RIKEN cDNA 1700129C05 gene	protein-coding
chr1-5549	chr1	98210533	98214764	+	34.6	4231	Intergenic	L1_Mus2|LINE|L1	81181	NR_040439	69030	Mm.402692	NR_040439		1810006J02Rik	RIKEN cDNA 1810006J02 gene	ncRNA
chr1-7771	chr1	98197591	98200299	+	21	2708	Intergenic	ORR1A2-int|LTR|ERVL-MaLR	67478	NR_040439	69030	Mm.402692	NR_040439		1810006J02Rik	RIKEN cDNA 1810006J02 gene	ncRNA
chr1-9133	chr1	98263609	98265633	+	16.5	2024	Intergenic	Intergenic	133154	NR_040439	69030	Mm.402692	NR_040439		1810006J02Rik	RIKEN cDNA 1810006J02 gene	ncRNA
chr1-7770	chr1	98158890	98159890	+	8.6	1000	Intergenic	Intergenic	27923	NR_040439	69030	Mm.402692	NR_040439		1810006J02Rik	RIKEN cDNA 1810006J02 gene	ncRNA
chr1-10825	chr1	98233024	98234024	+	8.42	1000	Intergenic	RLTR10A|LTR|ERVK	102057	NR_040439	69030	Mm.402692	NR_040439		1810006J02Rik	RIKEN cDNA 1810006J02 gene	ncRNA
chr1-15093	chr1	98251765	98252765	+	8.24	1000	Intergenic	Intergenic	120798	NR_040439	69030	Mm.402692	NR_040439		1810006J02Rik	RIKEN cDNA 1810006J02 gene	ncRNA
chr12-4308	chr12	49438275	49443878	+	38.6	5603	Intergenic	L1Md_F2|LINE|L1	39786	NR_045472	69054	Mm.417838	NR_045472		1810007C17Rik	RIKEN cDNA 1810007C17 gene	ncRNA
chr12-2991	chr12	49633348	49637703	+	33.5	4355	Intergenic	(CA)n|Simple_repeat|Simple_repeat	-154663	NR_045472	69054	Mm.417838	NR_045472		1810007C17Rik	RIKEN cDNA 1810007C17 gene	ncRNA
chr12-3614	chr12	49773738	49777681	+	27.3	3943	Intergenic	Lx2|LINE|L1	-294847	NR_045472	69054	Mm.417838	NR_045472		1810007C17Rik	RIKEN cDNA 1810007C17 gene	ncRNA
chr12-5188	chr12	49597716	49599771	+	17	2055	Intergenic	Lx2A1|LINE|L1	-117881	NR_045472	69054	Mm.417838	NR_045472		1810007C17Rik	RIKEN cDNA 1810007C17 gene	ncRNA
chr12-5185	chr12	49540286	49542157	+	15.6	1871	Intergenic	Lx10|LINE|L1	-60359	NR_045472	69054	Mm.417838	NR_045472		1810007C17Rik	RIKEN cDNA 1810007C17 gene	ncRNA
chr12-4309	chr12	49519032	49520821	+	15.4	1789	Intergenic	Intergenic	-39064	NR_045472	69054	Mm.417838	NR_045472		1810007C17Rik	RIKEN cDNA 1810007C17 gene	ncRNA
chr12-2994	chr12	49791063	49792714	+	13.9	1651	Intergenic	L1_Mus1|LINE|L1	-311026	NR_045472	69054	Mm.417838	NR_045472		1810007C17Rik	RIKEN cDNA 1810007C17 gene	ncRNA
chr12-6153	chr12	49593001	49594686	+	13.4	1685	Intergenic	L1VL4|LINE|L1	-112981	NR_045472	69054	Mm.417838	NR_045472		1810007C17Rik	RIKEN cDNA 1810007C17 gene	ncRNA
chr12-6157	chr12	49852802	49854349	+	11.2	1547	Intergenic	L1_Mus1|LINE|L1	-372713	NR_045472	69054	Mm.417838	NR_045472		1810007C17Rik	RIKEN cDNA 1810007C17 gene	ncRNA
chr12-5192	chr12	49808498	49809879	+	10.4	1381	Intergenic	Intergenic	-328326	NR_045472	69054	Mm.417838	NR_045472		1810007C17Rik	RIKEN cDNA 1810007C17 gene	ncRNA
chr12-2990	chr12	49451358	49452358	+	8.79	1000	Intergenic	Intergenic	29004	NR_045472	69054	Mm.417838	NR_045472		1810007C17Rik	RIKEN cDNA 1810007C17 gene	ncRNA
chr12-2995	chr12	49974021	49975021	+	8.42	1000	Intergenic	Intergenic	-493659	NR_045472	69054	Mm.417838	NR_045472		1810007C17Rik	RIKEN cDNA 1810007C17 gene	ncRNA
chr12-4313	chr12	50000369	50001369	+	8.42	1000	Intergenic	Lx3C|LINE|L1	-520007	NR_045472	69054	Mm.417838	NR_045472		1810007C17Rik	RIKEN cDNA 1810007C17 gene	ncRNA
[truncated: 53,455 more rows]
